# Supplementary material
Source: PubMed Central journal article supplement (PMC6941172)
Supplement: NIHMS1063321-supplement-Supplemental.pdf [file NIHMS1063321-supplement-Supplemental.pdf]

## Supporting Information

### **Design and Synthesis of Novel Deuterated Ligands Functionally Selective for the $\gamma$ -Aminobutyric Acid Type A Receptor (GABA<sub>A</sub>R) $\alpha 6$ Subtype with Improved Metabolic Stability and Enhanced Bioavailability**

Daniel E. Knutson<sup>a</sup>, Revathi Kodali<sup>a</sup>, Branka Divović<sup>b</sup>, Marco Treven<sup>c</sup>, Michael R. Stephen<sup>a</sup>, Nicolas M. Zahn<sup>a</sup>, Vladimir Dobričić<sup>c</sup>, Alec T. Huber<sup>a</sup>, Matheus A. Meirelles<sup>a</sup>, Ranjit S. Verma<sup>a</sup>, Laurin Wimmer<sup>d</sup>, Christopher Witzigmann<sup>a</sup>, Leggy A. Arnold<sup>a</sup>, Lih-Chu Chiou<sup>f,g,h</sup>, Margot Ernst<sup>e</sup>, Marko D. Mihovilovic<sup>d</sup>, Miroslav M. Savić<sup>b</sup>, Werner Sieghart<sup>e</sup>, and James M. Cook<sup>a,\*</sup>

<sup>a</sup>Department of Chemistry and Biochemistry, Milwaukee Institute for Drug Discovery, University of Wisconsin-Milwaukee, 3210 N. Cramer St., Milwaukee, Wisconsin 53211, USA.

<sup>b</sup>Department of Pharmacology, Faculty of Pharmacy, University of Belgrade, Vojvode Stepe 450, 11221 Belgrade, Serbia.

<sup>c</sup>Department of Pharmaceutical Chemistry, Faculty of Pharmacy, University of Belgrade, Vojvode Stepe 450, 11221 Belgrade, Serbia.

<sup>d</sup>TU Wien—Institute of Applied Synthetic Chemistry, Getreidemarkt 9/163, A-1060 Vienna, Austria.

<sup>e</sup>Department of Molecular Neurosciences, Center for Brain Research, Medical University of Vienna, Spitalgasse 4, A-1090 Vienna, Austria.

<sup>f</sup>Department of Pharmacology, <sup>g</sup>Graduate Institute of Brain and Mind Sciences, College of Medicine, National Taiwan University, Taipei 10051, Taiwan.

<sup>h</sup>Graduate Institute of Acupuncture Science, China Medical University, Taichung 40402, Taiwan

## Table of Contents

|                                                                                 |            |
|---------------------------------------------------------------------------------|------------|
| <b>Table S1:</b> Primary radioligand binding assays                             | <b>S2</b>  |
| <b>Table S2:</b> Secondary radioligand binding assays                           | <b>S11</b> |
| <b>Table S3:</b> Results of Cytotoxicity Studies on HEK293 and HEPG2 cells      | <b>S13</b> |
| <b>Figure S1:</b> Cytotoxicity of ligands on HEK293 and HEPG2 cells             | <b>S14</b> |
| <b>Figure S2:</b> Motor coordination studies on selected ligands on the rotorod | <b>S15</b> |
| <b>Table S4:</b> Additional ligands synthesized                                 | <b>S16</b> |
| <b>Scheme S1:</b> Synthesis of additional analogs                               | <b>S17</b> |
| <b>Supporting Experimental:</b>                                                 | <b>S18</b> |
| <b>Human Liver (HLM) and Mouse Liver (MLM) Microsomal Assays:</b>               | <b>S32</b> |

**Table S1:** Primary radioligand binding assays. Compound-induced radioligand displacement assays for 46 receptors, transporters and channels conducted by the National Institute of Medical Health Psychoactive Drugs Screening Program (B. Roth et al., UNC, available at <http://pdsp.med.unc.edu>).<sup>a</sup>

| Compound                 | Serotonin<br>5-HT <sub>1A</sub> | Serotonin<br>5-HT <sub>1B</sub> | Serotonin<br>5-HT <sub>1D</sub> | Serotonin<br>5-HT <sub>1E</sub> | Serotonin<br>5-HT <sub>2A</sub> | Serotonin<br>5-HT <sub>2B</sub> |
|--------------------------|---------------------------------|---------------------------------|---------------------------------|---------------------------------|---------------------------------|---------------------------------|
| Radioligand              | [ <sup>3</sup> H]8-OH-DPAT      | [ <sup>3</sup> H]GR127543       | [ <sup>3</sup> H]GR127543       | [ <sup>3</sup> H]5-HT           | [ <sup>3</sup> H]Ketanserin     | [ <sup>3</sup> H]LSD            |
| <b>8a<sup>p</sup></b>    | 9.7                             | 12                              | 27.5                            | 1.3                             | 12.8                            | 28.6                            |
| <b>8b<sup>b,p</sup></b>  | -5.4                            | 21.6                            | 11.3                            | 0                               | -2.8                            | 46.3                            |
| <b>8c<sup>b,p</sup></b>  | 11.1                            | 22.8                            | 28                              | -16.5                           | 0.4                             | 37.9                            |
| <b>8d<sup>b,p</sup></b>  | 0.7                             | 25.5                            | 23.5                            | -18.9                           | 1.2                             | 47                              |
| <b>8e<sup>b,m</sup></b>  | -13.7                           | 1.8                             | 2.4                             | -4.2                            | -5.2                            | 22.6                            |
| <b>8f<sup>b,o</sup></b>  | -6                              | -4.2                            | -10.2                           | -7.8                            | -13.7                           | 21                              |
| <b>8g<sup>b,m</sup></b>  | -2.1                            | -8.2                            | -8.4                            | 7.2                             | 2.7                             | 15.9                            |
| <b>8h<sup>b,o</sup></b>  | 0.3                             | -8.6                            | -9.2                            | -0.8                            | -11.8                           | 20.1                            |
| <b>13a<sup>b,e</sup></b> | -2.6                            | -5                              | 11.2                            | -1.5                            | 3.5                             | 25.6                            |
| <b>13b<sup>b,e</sup></b> | -5.7                            | 4.1                             | -1.4                            | 1.8                             | -6.8                            | 8                               |
| <b>13c<sup>b,e</sup></b> | -0.7                            | -4.1                            | 0.3                             | 8.6                             | 0.2                             | 48.7                            |
| <b>13i<sup>b,e</sup></b> | 1.5                             | -4                              | -3.6                            | -5.1                            | 5.9                             | 27.3                            |
| <b>8i<sup>m</sup></b>    | -1.3                            | -14.8                           | 5.6                             | 1                               | 12.2                            | 8.3                             |
| <b>8j<sup>c,m</sup></b>  | -15.8                           | -8.5                            | -6.5                            | -5.4                            | -2.5                            | 37.7                            |
| <b>8l<sup>c,p</sup></b>  | 7.4                             | 8                               | 13.7                            | -11.3                           | -1.4                            | 49.9                            |
| <b>8m<sup>c,o</sup></b>  | -8.2                            | -12.8                           | -10.2                           | 9.1                             | -1.5                            | 9.9                             |
| <b>13e<sup>c,e</sup></b> | 8.9                             | 2.4                             | 4.9                             | -1.3                            | 9.4                             | 37.1                            |
| <b>13f<sup>c,e</sup></b> | -1.3                            | 2.6                             | -8.3                            | -24.2                           | -11.1                           | 3.9                             |
| <b>8n<sup>p</sup></b>    | -16.1                           | 1.4                             | 4.5                             | -1                              | 5.7                             | 15.3                            |
| <b>8o<sup>d,p</sup></b>  | 1.8                             | 9.7                             | 6.5                             | -9.7                            | -2.6                            | <b>72.2</b>                     |
| <b>8p<sup>d,m</sup></b>  | -6.3                            | -9.5                            | -9.1                            | -3.5                            | -8.8                            | 23.6                            |
| <b>8q<sup>d,o</sup></b>  | 32.6                            | 6.9                             | -11.7                           | -9.9                            | -15.5                           | 45.5                            |
| <b>13g<sup>d,e</sup></b> | 2.7                             | -5.3                            | 0.9                             | -25.2                           | -5.5                            | 13.4                            |
| <b>13h<sup>d,e</sup></b> | -10.7                           | -2.8                            | -5.9                            | -29.3                           | -6.4                            | 23                              |
| <b>8r<sup>p</sup></b>    | 33.8                            | 13.1                            | 5.9                             | 1.4                             | -1.9                            | 28.8                            |
| <b>8s<sup>m</sup></b>    | 6.6                             | -0.1                            | 3.1                             | -3.3                            | 1.8                             | 21                              |
| <b>8t<sup>o</sup></b>    | 3.2                             | -8.6                            | -5.1                            | 5.6                             | 0.8                             | 9                               |

<sup>a</sup>Data are the percent inhibition induced by 10 μM of each respective compound on the specific binding at the screened target. The higher the number the more the radioligand was displaced. The number higher than 50% inhibition is considered meaningful and is shown in **bold** and **highlighted**. <sup>b</sup>8a related analogs in **red**. <sup>c</sup>8i related analogs in **blue**. <sup>d</sup>8n related analogs in **green**. <sup>e</sup>“A-ring” or “D-ring” N-hetero analogs. <sup>f</sup>BZP = benzodiazepine, DOR = δ-opioid receptor, KOR = κ-opioid receptor, MOR = μ-opioid receptor. <sup>o</sup>D-ring “ortho”. <sup>m</sup>D-ring “meta”. <sup>p</sup>D-ring “para”.

**Table S1:** Primary radioligand binding assays. Compound-induced radioligand displacement assays for 46 receptors, transporters and channels conducted by the National Institute of Medical Health Psychoactive Drugs Screening Program (B. Roth et al., UNC, available at <http://pdsp.med.unc.edu>).<sup>a</sup>

| Compound                 | Serotonin<br>5-HT <sub>2C</sub> | Serotonin<br>5-HT <sub>3</sub> | Serotonin<br>5-HT <sub>5a</sub> | Serotonin<br>5-HT <sub>6</sub> | Serotonin<br>5-HT <sub>7</sub> | Adrenergic<br>$\alpha_{1A}$ |
|--------------------------|---------------------------------|--------------------------------|---------------------------------|--------------------------------|--------------------------------|-----------------------------|
| Radioligand              | [ <sup>3</sup> H]Mesulergine    | [ <sup>3</sup> H]LY278584      | [ <sup>3</sup> H]LSD            | [ <sup>3</sup> H]LSD           | [ <sup>3</sup> H]LSD           | [ <sup>3</sup> H]Prazosin   |
| <b>8a<sup>p</sup></b>    | 36.2                            | 33.4                           | 5.8                             | 24.5                           | <b>78.6</b>                    | -14.2                       |
| <b>8b<sup>b,p</sup></b>  | 7.8                             | 14.6                           | 3.9                             | 2.4                            | <b>60.2</b>                    | -3.6                        |
| <b>8c<sup>b,p</sup></b>  | 37.5                            | 35.4                           | 31.2                            | 23.3                           | <b>69</b>                      | -1.9                        |
| <b>8d<sup>b,p</sup></b>  | 7.1                             | 21.3                           | 20.2                            | 1.4                            | <b>74.4</b>                    | -4.4                        |
| <b>8e<sup>b,m</sup></b>  | -3.6                            | 14.4                           | -14.9                           | 1.5                            | 34.7                           | -20.1                       |
| <b>8f<sup>b,o</sup></b>  | -3.3                            | 1.9                            | -4.1                            | -13.3                          | 20.8                           | 19.7                        |
| <b>8g<sup>b,m</sup></b>  | -14.6                           | 8.1                            | -11.6                           | -9.3                           | -4.8                           | -17.9                       |
| <b>8h<sup>b,o</sup></b>  | -5.8                            | -8.4                           | -19.5                           | 0.6                            | 13.2                           | 0                           |
| <b>13a<sup>b,e</sup></b> | 5.2                             | 1.8                            | 6.2                             | 11.5                           | 22.4                           | -18.9                       |
| <b>13b<sup>b,e</sup></b> | -1.4                            | -6.3                           | -16.5                           | -3.8                           | 15.6                           | -13.6                       |
| <b>13c<sup>b,e</sup></b> | 5                               | -7.4                           | -12.1                           | 13                             | 26.5                           | -7.9                        |
| <b>13i<sup>b,e</sup></b> | 5.6                             | 10.4                           | -10.5                           | 9.6                            | 32.7                           | -9.2                        |
| <b>8i<sup>m</sup></b>    | 10.3                            | 24.2                           | -2.8                            | 13.5                           | 41.7                           | -9.6                        |
| <b>8j<sup>c,m</sup></b>  | -3.7                            | 3.1                            | -9.1                            | 1.9                            | 20.7                           | -16.8                       |
| <b>8l<sup>c,p</sup></b>  | 10.1                            | 22.5                           | 21.1                            | 1.1                            | 12.8                           | -6.8                        |
| <b>8m<sup>c,o</sup></b>  | -1.9                            | -6.4                           | -9.7                            | -7.1                           | 0.4                            | -6.9                        |
| <b>13e<sup>c,e</sup></b> | 5.8                             | 6.2                            | 8.7                             | 15.2                           | 6.5                            | -6.9                        |
| <b>13f<sup>c,e</sup></b> | -7.5                            | 15.9                           | -7                              | -4.7                           | 6.3                            | 5.7                         |
| <b>8n<sup>p</sup></b>    | 4.9                             | 20.9                           | -0.4                            | 10.4                           | <b>61.5</b>                    | -9.7                        |
| <b>8o<sup>d,p</sup></b>  | 13.9                            | 9.7                            | 13.5                            | 0.2                            | <b>54.6</b>                    | -6.9                        |
| <b>8p<sup>d,m</sup></b>  | -0.8                            | 1.8                            | -10.2                           | -8.7                           | 12.6                           | 5.7                         |
| <b>8q<sup>d,o</sup></b>  | <b>73.8</b>                     | 43.8                           | 3                               | -16.4                          | 15.9                           | 2.5                         |
| <b>13g<sup>d,e</sup></b> | <b>67.9</b>                     | -14.9                          | -14                             | -6.9                           | -13.7                          | -12.1                       |
| <b>13h<sup>d,e</sup></b> | 7.9                             | 18.9                           | -1.5                            | -5.3                           | 30.6                           | 2.7                         |
| <b>8r<sup>p</sup></b>    | <b>76.4</b>                     | 45.8                           | 18.1                            | 13.4                           | 20.1                           | -20.1                       |
| <b>8s<sup>m</sup></b>    | 0                               | -4.8                           | 11.6                            | 3.9                            | -4.3                           | -14.2                       |
| <b>8t<sup>o</sup></b>    | -0.3                            | 5.7                            | 11.2                            | 6.9                            | 1.1                            | -25.1                       |

<sup>a</sup>Data are the percent inhibition induced by 10  $\mu$ M of each respective compound on the specific binding at the screened target. The higher the number the more the radioligand was displaced. The number higher than 50% inhibition is considered meaningful and is shown in **bold** and **highlighted**. <sup>b</sup>**8a** related analogs in **red**. <sup>c</sup>**8i** related analogs in **blue**. <sup>d</sup>**8n** related analogs in **green**. <sup>e</sup>“A-ring” or “D-ring” N-hetero analogs. <sup>f</sup>BZP = benzodiazepine, DOR =  $\delta$ -opioid receptor, KOR =  $\kappa$ -opioid receptor, MOR =  $\mu$ -opioid receptor. <sup>o</sup>D-ring “ortho”. <sup>m</sup>D-ring “meta”. <sup>p</sup>D-ring “para”.

**Table S1:** Primary radioligand binding assays. Compound-induced radioligand displacement assays for 46 receptors, transporters and channels conducted by the National Institute of Medical Health Psychoactive Drugs Screening Program (B. Roth et al., UNC, available at <http://pdsp.med.unc.edu>).<sup>a</sup>

| Compound                 | Adrenergic<br>$\alpha_{2B}$ | Adrenergic<br>$\alpha_{1D}$ | Adrenergic<br>$\alpha_{2A}$ | Adrenergic<br>$\alpha_{2B}$ | Adrenergic<br>$\alpha_{2C}$ | Adrenergic<br>$\beta_1$         |
|--------------------------|-----------------------------|-----------------------------|-----------------------------|-----------------------------|-----------------------------|---------------------------------|
| Radioligand              | [ <sup>3</sup> H]Prazosin   | [ <sup>3</sup> H]Clonidine  | [ <sup>3</sup> H]Clonidine  | [ <sup>3</sup> H]Clonidine  | [ <sup>3</sup> H]Clonidine  | [ <sup>125</sup> I]Iodopindolol |
| <b>8a<sup>p</sup></b>    | 11.9                        | -3.2                        | -8.7                        | 6.4                         | 2.6                         | -10.4                           |
| <b>8b<sup>b,p</sup></b>  | 30.9                        | 8.8                         | 9.6                         | 6.4                         | 19.8                        | -7.8                            |
| <b>8c<sup>b,p</sup></b>  | 20.8                        | 16                          | 18.7                        | 18.9                        | 26.4                        | -2.7                            |
| <b>8d<sup>b,p</sup></b>  | 24.2                        | 14.3                        | 31.1                        | 9.2                         | 26.7                        | 21.5                            |
| <b>8e<sup>b,m</sup></b>  | 17.8                        | 0.2                         | -4.8                        | 6.8                         | 0.5                         | -9.1                            |
| <b>8f<sup>b,o</sup></b>  | 36.9                        | -3.3                        | 16.3                        | 3.3                         | 17.5                        | -16.9                           |
| <b>8g<sup>b,m</sup></b>  | 21.2                        | -1.6                        | -13.4                       | -30.3                       | -7.1                        | -15.8                           |
| <b>8h<sup>b,o</sup></b>  | 31.6                        | -4.6                        | 11                          | 17.3                        | 14.9                        | -4.7                            |
| <b>13a<sup>b,e</sup></b> | 37.8                        | 3                           | -3.4                        | 23.4                        | -7.5                        | 2                               |
| <b>13b<sup>b,e</sup></b> | 14.7                        | -17                         | -102.5                      | -21.5                       | -48.2                       | -12.1                           |
| <b>13c<sup>b,e</sup></b> | 13.3                        | 5.6                         | 10.4                        | 20                          | 17                          | -16.2                           |
| <b>13i<sup>b,e</sup></b> | 8                           | 9.2                         | 14.6                        | 33                          | 10                          | -13.6                           |
| <b>8i<sup>m</sup></b>    | 24.6                        | -3.9                        | -0.7                        | -5.7                        | 5.5                         | 7.7                             |
| <b>8j<sup>c,m</sup></b>  | 23.6                        | -18.1                       | -7.9                        | -1.1                        | 1.7                         | 11.4                            |
| <b>8l<sup>c,p</sup></b>  | 25                          | 2.8                         | 23.6                        | 14.2                        | 18.6                        | -3.4                            |
| <b>8m<sup>c,o</sup></b>  | 26.5                        | -2.8                        | 18.1                        | -2.3                        | 20                          | 1.6                             |
| <b>13e<sup>c,e</sup></b> | 22.7                        | 11.7                        | 6.4                         | 37.1                        | 13                          | 44.1                            |
| <b>13f<sup>c,e</sup></b> | 39.4                        | -13.2                       | -6.3                        | 19.5                        | -7.2                        | -13.6                           |
| <b>8n<sup>p</sup></b>    | 25.1                        | -7.8                        | 10.7                        | 9.9                         | -7.1                        | -7.3                            |
| <b>8o<sup>d,p</sup></b>  | 21.7                        | 15.1                        | 26.6                        | 4.8                         | 22.8                        | -6.6                            |
| <b>8p<sup>d,m</sup></b>  | 39.4                        | -13.2                       | -6.3                        | 19.5                        | -7.2                        | -13.6                           |
| <b>8q<sup>d,o</sup></b>  | 25.9                        | 1.8                         | 18.9                        | 11.7                        | 17.5                        | -4.4                            |
| <b>13g<sup>d,e</sup></b> | 14.6                        | -14.1                       | -123.2                      | -37.9                       | 14.3                        | 7.3                             |
| <b>13h<sup>d,e</sup></b> | 12.6                        | 9.6                         | -129.3                      | 7.2                         | 3.9                         | -16.7                           |
| <b>8r<sup>p</sup></b>    | 5.4                         | 0.4                         | -19.1                       | -1.4                        | -1.2                        | 1                               |
| <b>8s<sup>m</sup></b>    | 1                           | 12.9                        | -17.6                       | -6.8                        | 4.4                         | -10.2                           |
| <b>8t<sup>o</sup></b>    | 11.4                        | 4.9                         | -6.5                        | 8.5                         | -0.1                        | 1.7                             |

<sup>a</sup>Data are the percent inhibition induced by 10  $\mu$ M of each respective compound on the specific binding at the screened target. The higher the number the more the radioligand was displaced. The number higher than 50% inhibition is considered meaningful and is shown in **bold** and **highlighted**. <sup>b</sup>**8a** related analogs in **red**. <sup>c</sup>**8i** related analogs in **blue**. <sup>d</sup>**8n** related analogs in **green**. <sup>e</sup>“A-ring” or “D-ring” N-hetero analogs. <sup>f</sup>BZP = benzodiazepine, DOR =  $\delta$ -opioid receptor, KOR =  $\kappa$ -opioid receptor, MOR =  $\mu$ -opioid receptor. <sup>o</sup>D-ring “ortho”. <sup>m</sup>D-ring “meta”. <sup>p</sup>D-ring “para”.

**Table S1:** Primary radioligand binding assays. Compound-induced radioligand displacement assays for 46 receptors, transporters and channels conducted by the National Institute of Medical Health Psychoactive Drugs Screening Program (B. Roth et al., UNC, available at <http://pdsp.med.unc.edu>).<sup>a</sup>

| Compound                 | Adrenergic $\beta_2$            | Adrenergic $\beta_3$            | BZP <sup>f</sup> Rat Brain Site | Dopamine D <sub>1</sub>     | Dopamine D <sub>2</sub>              | Dopamine D <sub>3</sub>              |
|--------------------------|---------------------------------|---------------------------------|---------------------------------|-----------------------------|--------------------------------------|--------------------------------------|
| Radioligand              | [ <sup>125</sup> I]Iodopindolol | [ <sup>125</sup> I]Iodopindolol | [ <sup>3</sup> H]Flunitrazepam  | [ <sup>3</sup> H]-SCH233930 | [ <sup>3</sup> H]-N-methyl-spiperone | [ <sup>3</sup> H]-N-methyl-spiperone |
| <b>8a<sup>p</sup></b>    | 6.9                             | 4                               | <b>92.4</b>                     | -0.1                        | -20.8                                | 3.2                                  |
| <b>8b<sup>b,p</sup></b>  | -19.7                           | -5.7                            | <b>96.2</b>                     | -17.8                       | -16.5                                | -7.4                                 |
| <b>8c<sup>b,p</sup></b>  | -9.5                            | -19                             | <b>96.7</b>                     | 13.5                        | -5                                   | -5.8                                 |
| <b>8d<sup>b,p</sup></b>  | 8.6                             | -9.3                            | <b>94.5</b>                     | 5.7                         | -18.3                                | -7.7                                 |
| <b>8e<sup>b,m</sup></b>  | 3.9                             | -11.6                           | <b>95</b>                       | 10.1                        | -4.9                                 | -1.3                                 |
| <b>8f<sup>b,o</sup></b>  | -3.3                            | -7.3                            | <b>80.5</b>                     | -6.2                        | -3.9                                 | 13.8                                 |
| <b>8g<sup>b,m</sup></b>  | 7.4                             | -18.7                           | <b>99.3</b>                     | 17.4                        | 11.3                                 | -10                                  |
| <b>8h<sup>b,o</sup></b>  | 1.4                             | -17.5                           | 41.3                            | -2.4                        | -16                                  | -5                                   |
| <b>13a<sup>b,e</sup></b> | -4.2                            | -6.3                            | <b>91.3</b>                     | 6.1                         | -9                                   | 7.9                                  |
| <b>13b<sup>b,e</sup></b> | -6.3                            | -13.6                           | <b>93.7</b>                     | -15.2                       | 9.5                                  | 5.5                                  |
| <b>13c<sup>b,e</sup></b> | 3.4                             | -5.7                            | <b>98.2</b>                     | -3.9                        | -14.9                                | -3.6                                 |
| <b>13i<sup>b,e</sup></b> | 7                               | -7.1                            | <b>96.9</b>                     | 12.7                        | -3.1                                 | 0.6                                  |
| <b>8i<sup>m</sup></b>    | 12.6                            | -9.3                            | <b>94.1</b>                     | -12.1                       | -15.1                                | -5.1                                 |
| <b>8j<sup>c,m</sup></b>  | -4.1                            | -3.6                            | <b>96.3</b>                     | 4.2                         | -18.1                                | 3.1                                  |
| <b>8l<sup>c,p</sup></b>  | -8.7                            | 5.2                             | <b>95</b>                       | -5.1                        | -11.2                                | -11.2                                |
| <b>8m<sup>c,o</sup></b>  | -8                              | -15.2                           | <b>88.7</b>                     | -16.2                       | -11.2                                | -3.3                                 |
| <b>13e<sup>c,e</sup></b> | -3.9                            | -2.7                            | <b>100.6</b>                    | -0.4                        | -2.6                                 | 7.2                                  |
| <b>13f<sup>c,e</sup></b> | 5.3                             | -2.7                            | <b>95.6</b>                     | -1.8                        | 15.1                                 | 16.6                                 |
| <b>8n<sup>p</sup></b>    | 1.7                             | -9.6                            | <b>93.2</b>                     | -1.8                        | -12.4                                | -0.8                                 |
| <b>8o<sup>d,p</sup></b>  | -10.3                           | -19.7                           | <b>97.4</b>                     | -0.7                        | -14.4                                | -6.6                                 |
| <b>8p<sup>d,m</sup></b>  | 5.3                             | -2.7                            | <b>95.6</b>                     | -0.1                        | -13.8                                | 6.3                                  |
| <b>8q<sup>d,o</sup></b>  | -9.1                            | -23.3                           | 42.2                            | 11.9                        | -24.2                                | 11.9                                 |
| <b>13g<sup>d,e</sup></b> | -17.8                           | 9.8                             | <b>101.4</b>                    | 2.2                         | 19.1                                 | -5.6                                 |
| <b>13h<sup>d,e</sup></b> | -5.1                            | -1.1                            | <b>93.3</b>                     | 10.5                        | 3.9                                  | 10.8                                 |
| <b>8r<sup>p</sup></b>    | 11.7                            | 0.7                             | <b>91.5</b>                     | 0                           | -19                                  | 8.6                                  |
| <b>8s<sup>m</sup></b>    | 4.5                             | 1.9                             | <b>96.7</b>                     | -1.4                        | -2.9                                 | -2.8                                 |
| <b>8t<sup>p</sup></b>    | -9.9                            | 5.9                             | <b>78</b>                       | -2.5                        | -11                                  | 7.6                                  |

<sup>a</sup>Data are the percent inhibition induced by 10  $\mu$ M of each respective compound on the specific binding at the screened target. The higher the number the more the radioligand was displaced. The number higher than 50% inhibition is considered meaningful and is shown in **bold** and **highlighted**. <sup>b</sup>**8a** related analogs in **red**. <sup>c</sup>**8i** related analogs in **blue**. <sup>d</sup>**8n** related analogs in **green**. <sup>e</sup>“A-ring” or “D-ring” N-hetero analogs. <sup>f</sup>BZP = benzodiazepine, DOR =  $\delta$ -opioid receptor, KOR =  $\kappa$ -opioid receptor, MOR =  $\mu$ -opioid receptor. <sup>o</sup>D-ring “ortho”. <sup>m</sup>D-ring “meta”. <sup>p</sup>D-ring “para”.

**Table S1:** Primary radioligand binding assays. Compound-induced radioligand displacement assays for 46 receptors, transporters and channels conducted by the National Institute of Medical Health Psychoactive Drugs Screening Program (B. Roth et al., UNC, available at <http://pdsp.med.unc.edu>).<sup>a</sup>

| Compound                 | Dopamine D <sub>4</sub>              | Dopamine D <sub>5</sub>     | Transporter Dopamine (DAT) | DOR <sup>f</sup>       | GABA <sub>A</sub>         | Histamine H <sub>1</sub>    |
|--------------------------|--------------------------------------|-----------------------------|----------------------------|------------------------|---------------------------|-----------------------------|
| Radioligand              | [ <sup>3</sup> H]-N-methyl-spiperone | [ <sup>3</sup> H]-SCH233930 | [ <sup>3</sup> H]WIN35428  | [ <sup>3</sup> H]DADLE | [ <sup>3</sup> H]Muscimol | [ <sup>3</sup> H]Pyrilamine |
| <b>8a<sup>p</sup></b>    | -0.4                                 | <b>57.9</b>                 | -7.8                       | 10.8                   | 13.1                      | 52.4                        |
| <b>8b<sup>b,p</sup></b>  | -0.5                                 | 14.7                        | -6.7                       | 6.3                    | 6.8                       | 48.7                        |
| <b>8c<sup>b,p</sup></b>  | 5.4                                  | 8.5                         | -14                        | 23.2                   | 8.5                       | 25.5                        |
| <b>8d<sup>b,p</sup></b>  | 1.4                                  | 12.3                        | -7.7                       | 5.9                    | 2.6                       | 28.9                        |
| <b>8e<sup>b,m</sup></b>  | -3                                   | 30.9                        | 4.4                        | 3.6                    | 7.6                       | 64.3                        |
| <b>8f<sup>b,o</sup></b>  | 2.2                                  | 14.3                        | -5.2                       | 28.6                   | 1                         | 14.8                        |
| <b>8g<sup>b,m</sup></b>  | -15                                  | 12.2                        | -32.4                      | 9.5                    | -1.6                      | 41.7                        |
| <b>8h<sup>b,o</sup></b>  | 2                                    | 1.7                         | -1                         | -12.3                  | -5.2                      | 49.8                        |
| <b>13a<sup>b,e</sup></b> | -7.9                                 | 4                           | 10.3                       | 26                     | 14.5                      | 57.6                        |
| <b>13b<sup>b,e</sup></b> | -9.5                                 | 7.5                         | 12.4                       | -2.3                   | -9.2                      | 48.7                        |
| <b>13c<sup>b,e</sup></b> | -7.3                                 | 9                           | -10.4                      | -8.2                   | 17.3                      | 62.1                        |
| <b>13i<sup>b,e</sup></b> | 1.2                                  | 9.2                         | -9.5                       | -5.7                   | 9.8                       | 74.7                        |
| <b>8i<sup>m</sup></b>    | -6.7                                 | 44.9                        | 5.3                        | -0.1                   | -0.5                      | 64.7                        |
| <b>8j<sup>c,m</sup></b>  | -0.5                                 | 23.2                        | 0.9                        | 14.3                   | -2.9                      | 56.2                        |
| <b>8l<sup>c,p</sup></b>  | -6.7                                 | 9                           | 2                          | <b>50.8</b>            | 7.5                       | 38.9                        |
| <b>8m<sup>c,o</sup></b>  | -4.1                                 | -1.9                        | -7.1                       | 0.2                    | -3.2                      | 27.9                        |
| <b>13e<sup>c,e</sup></b> | 5.9                                  | 4.9                         | -1                         | <b>72.4</b>            | 18.5                      | 51.9                        |
| <b>13f<sup>c,e</sup></b> | 5.4                                  | -3.9                        | 5.2                        | <b>58.6</b>            | 24.5                      | -12                         |
| <b>8n<sup>p</sup></b>    | 3.7                                  | 40.8                        | 2.8                        | -1                     | -9.9                      | 71.8                        |
| <b>8o<sup>d,p</sup></b>  | 1                                    | 17                          | -3.5                       | 14.1                   | 9.2                       | 55.9                        |
| <b>8p<sup>d,m</sup></b>  | 1.4                                  | 21.8                        | 2.5                        | 0.6                    | -4.8                      | 31.4                        |
| <b>8q<sup>d,o</sup></b>  | -6.9                                 | 10                          | -9.2                       | -16.9                  | -3.1                      | 37.8                        |
| <b>13g<sup>d,e</sup></b> | 2                                    | 0.1                         | -10.9                      | 47.7                   | 45.5                      | 44.4                        |
| <b>13h<sup>d,e</sup></b> | 17.9                                 | 1.8                         | -12                        | 20.1                   | <b>66.8</b>               | -15                         |
| <b>8r<sup>p</sup></b>    | -0.3                                 | <b>59.1</b>                 | 5.2                        | 31.4                   | -15.7                     | 45.1                        |
| <b>8s<sup>m</sup></b>    | 14.7                                 | 4.3                         | 6.7                        | 7.1                    | 2.7                       | 40.5                        |
| <b>8t<sup>o</sup></b>    | -0.8                                 | 5.7                         | 15.4                       | -10                    | 2.6                       | 54.1                        |

<sup>a</sup>Data are the percent inhibition induced by 10 μM of each respective compound on the specific binding at the screened target. The higher the number the more the radioligand was displaced. The number higher than 50% inhibition is considered meaningful and is shown in **bold** and **highlighted**. <sup>b</sup>**8a** related analogs in **red**. <sup>c</sup>**8i** related analogs in **blue**. <sup>d</sup>**8n** related analogs in **green**. <sup>e</sup>“A-ring” or “D-ring” N-hetero analogs. <sup>f</sup>BZP = benzodiazepine, DOR = δ-opioid receptor, KOR = κ-opioid receptor, MOR = μ-opioid receptor. <sup>o</sup>D-ring “ortho”. <sup>m</sup>D-ring “meta”. <sup>p</sup>D-ring “para”.

**Table S1:** Primary radioligand binding assays. Compound-induced radioligand displacement assays for 46 receptors, transporters and channels conducted by the National Institute of Medical Health Psychoactive Drugs Screening Program (B. Roth et al., UNC, available at <http://pdsp.med.unc.edu>).<sup>a</sup>

| Compound                 | Histamine H <sub>2</sub>   | Histamine H <sub>3</sub>               | Histamine H <sub>4</sub>   | hERG binding | KOR <sup>f</sup>        | Muscarinic M <sub>1</sub> |
|--------------------------|----------------------------|----------------------------------------|----------------------------|--------------|-------------------------|---------------------------|
| Radioligand              | [ <sup>3</sup> H]Tiotidine | [ <sup>3</sup> H]alpha-methylhistamine | [ <sup>3</sup> H]Histamine | N/A          | [ <sup>3</sup> H]U69593 | [ <sup>3</sup> H]QNB      |
| <b>8a<sup>p</sup></b>    | -1.4                       | -1.5                                   | -12.2                      | 7.4          | 7.1                     | 20.6                      |
| <b>8b<sup>b,p</sup></b>  | 20.8                       | -1.3                                   | -5.9                       | -0.1         | 11.9                    | 8.5                       |
| <b>8c<sup>b,p</sup></b>  | -0.7                       | -3                                     | 0.6                        | 6.9          | 22.8                    | 16.9                      |
| <b>8d<sup>b,p</sup></b>  | -2.6                       | -6.3                                   | 13.2                       | 8.7          | 10.1                    | 17.6                      |
| <b>8e<sup>b,m</sup></b>  | 23                         | -2                                     | 0.2                        | 5.2          | 1.8                     | 0                         |
| <b>8f<sup>b,o</sup></b>  | -5                         | 2.4                                    | 1.3                        | -29.3        | 26.3                    | 19.1                      |
| <b>8g<sup>b,m</sup></b>  | -1.5                       | -2.9                                   | -9.7                       | -5.4         | 20.5                    | -7                        |
| <b>8h<sup>b,o</sup></b>  | -6.5                       | 2.9                                    | -9.9                       | -1           | 23.5                    | 5.2                       |
| <b>13a<sup>b,e</sup></b> | -1.8                       | 10.9                                   | -1.1                       | 5.1          | 8.5                     | -19.5                     |
| <b>13b<sup>b,e</sup></b> | 1.5                        | 11.7                                   | -8.4                       | 6.4          | -4.7                    | -8                        |
| <b>13c<sup>b,e</sup></b> | 23.5                       | 12                                     | 1.1                        | 8.6          | 8.6                     | -0.8                      |
| <b>13i<sup>b,e</sup></b> | 24.1                       | 32                                     | -0.5                       | 9.1          | 20.3                    | -1.2                      |
| <b>8i<sup>m</sup></b>    | 7.5                        | 3.9                                    | -4.6                       | 0.1          | 10.2                    | 4.5                       |
| <b>8j<sup>c,m</sup></b>  | -0.5                       | 2                                      | 0                          | -16.1        | -3.8                    | -8.1                      |
| <b>8l<sup>c,p</sup></b>  | 2.4                        | -9                                     | -8.9                       | -2.5         | 15.9                    | -0.1                      |
| <b>8m<sup>c,o</sup></b>  | -12.1                      | -1.9                                   | -7.8                       | -1.9         | 21.4                    | 8                         |
| <b>13e<sup>c,e</sup></b> | 10.2                       | 6.3                                    | 3.8                        | -1.2         | 21.2                    | 9.3                       |
| <b>13f<sup>c,e</sup></b> | 7.7                        | -11                                    | 7.9                        | 8.1          | -2.1                    | -5.6                      |
| <b>8n<sup>p</sup></b>    | 8.5                        | -4.6                                   | -3.1                       | -2.7         | 14.5                    | 3.9                       |
| <b>8o<sup>d,p</sup></b>  | 13.8                       | 2.6                                    | 13.8                       | 8.8          | 26.5                    | 5.6                       |
| <b>8p<sup>d,m</sup></b>  | -4.1                       | 0.5                                    | 1.5                        | -15.1        | 1.2                     | 18.2                      |
| <b>8q<sup>d,o</sup></b>  | -0.4                       | -4.7                                   | -11.1                      | -4.1         | 30.9                    | -5.8                      |
| <b>13g<sup>d,e</sup></b> | -7.4                       | -1.7                                   | 2.3                        | 0.3          | -3.8                    | -4.1                      |
| <b>13h<sup>d,e</sup></b> | 31.4                       | -10                                    | -0.1                       | -10.3        | -8.1                    | -9.3                      |
| <b>8r<sup>p</sup></b>    | -3.3                       | 26.5                                   | 18.7                       | 17.8         | 8.9                     | -4.5                      |
| <b>8s<sup>m</sup></b>    | -3.3                       | 12.8                                   | -5.3                       | 4.6          | 4.7                     | -4.8                      |
| <b>8t<sup>o</sup></b>    | 0.2                        | 16.7                                   | 26.8                       | 31.3         | 9.1                     | -1.7                      |

<sup>a</sup>Data are the percent inhibition induced by 10 μM of each respective compound on the specific binding at the screened target. The higher the number the more the radioligand was displaced. The number higher than 50% inhibition is considered meaningful and is shown in **bold** and **highlighted**. <sup>b</sup>**8a** related analogs in **red**. <sup>c</sup>**8i** related analogs in **blue**. <sup>d</sup>**8n** related analogs in **green**. <sup>e</sup>“A-ring” or “D-ring” N-hetero analogs. <sup>f</sup>BZP = benzodiazepine, DOR = δ-opioid receptor, KOR = κ-opioid receptor, MOR = μ-opioid receptor. <sup>o</sup>D-ring “ortho”. <sup>m</sup>D-ring “meta”. <sup>p</sup>D-ring “para”.



**Table S1:** Primary radioligand binding assays. Compound-induced radioligand displacement assays for 46 receptors, transporters and channels conducted by the National Institute of Medical Health Psychoactive Drugs Screening Program (B. Roth et al., UNC, available at <http://pdsp.med.unc.edu>).<sup>a</sup>

| Compound                 | Muscarinic M <sub>2</sub> | Muscarinic M <sub>3</sub> | Muscarinic M <sub>4</sub> | Muscarinic M <sub>5</sub> | MOR <sup>f</sup>       |
|--------------------------|---------------------------|---------------------------|---------------------------|---------------------------|------------------------|
| Radioligand              | [ <sup>3</sup> H]QNB      | [ <sup>3</sup> H]QNB      | [ <sup>3</sup> H]QNB      | [ <sup>3</sup> H]QNB      | [ <sup>3</sup> H]DAMGO |
| <b>8a<sup>p</sup></b>    | -8.4                      | -4.5                      | 10.9                      | -5.4                      | 38.3                   |
| <b>8b<sup>b,p</sup></b>  | 6                         | 27                        | 19.2                      | -4.8                      | <b>53.1</b>            |
| <b>8c<sup>b,p</sup></b>  | 6.9                       | 13.6                      | -14                       | 2.1                       | <b>50.8</b>            |
| <b>8d<sup>b,p</sup></b>  | 8.4                       | 18.1                      | 9.2                       | 3.9                       | 48.9                   |
| <b>8e<sup>b,m</sup></b>  | -2.6                      | 5.2                       | -0.7                      | -6.6                      | 3.2                    |
| <b>8f<sup>b,o</sup></b>  | 15.4                      | 7.3                       | -7.5                      | 14.8                      | -11                    |
| <b>8g<sup>b,m</sup></b>  | -8.1                      | -15                       | -10                       | 4.4                       | 18.5                   |
| <b>8h<sup>b,o</sup></b>  | 14.9                      | 15.2                      | -37                       | -6                        | 18.8                   |
| <b>13a<sup>b,e</sup></b> | -16.6                     | -20                       | <b>53.2</b>               | 31.8                      | 5.5                    |
| <b>13b<sup>b,e</sup></b> | -24.1                     | -20                       | -12                       | -29.1                     | -4.5                   |
| <b>13c<sup>b,e</sup></b> | 10                        | -7.5                      | 7                         | -13.6                     | 4                      |
| <b>13i<sup>b,e</sup></b> | 17.8                      | -4                        | 7.3                       | 2.9                       | -1.6                   |
| <b>8i<sup>m</sup></b>    | -2.7                      | -0.3                      | -1.7                      | 0.1                       | -0.6                   |
| <b>8j<sup>c,m</sup></b>  | 2.6                       | 15.2                      | -3.5                      | -5.2                      | -0.2                   |
| <b>8l<sup>c,p</sup></b>  | 16.2                      | 16.2                      | 21.6                      | 3.5                       | 46.5                   |
| <b>8m<sup>c,o</sup></b>  | 5.3                       | 21.6                      | -26                       | 9.4                       | -6                     |
| <b>13e<sup>c,e</sup></b> | 8.8                       | -16                       | 15.6                      | 48.7                      | 21.4                   |
| <b>13f<sup>c,e</sup></b> | -19.4                     | 13.1                      | -2                        | 4.3                       | 10.8                   |
| <b>8n<sup>p</sup></b>    | -0.2                      | 2.9                       | 1.9                       | 2.3                       | 9.7                    |
| <b>8o<sup>d,p</sup></b>  | 8                         | -3.2                      | 31.5                      | 0.1                       | <b>57.2</b>            |
| <b>8p<sup>d,m</sup></b>  | 4                         | 6.9                       | -1.6                      | 25.8                      | -1.7                   |
| <b>8q<sup>d,o</sup></b>  | 14                        | -1.5                      | -22                       | -4.8                      | 11.3                   |
| <b>13g<sup>d,e</sup></b> | -17.8                     | -15                       | -8.1                      | -27.1                     | 10.5                   |
| <b>13h<sup>d,e</sup></b> | 13.3                      | -1.1                      | -4.6                      | -2.4                      | 24.3                   |
| <b>8r<sup>p</sup></b>    | -4.5                      | -21.3                     | -11                       | 2.6                       | 1.7                    |
| <b>8s<sup>m</sup></b>    | -4.8                      | -15.1                     | -13                       | 23.9                      | 5.8                    |
| <b>8t<sup>o</sup></b>    | -1.7                      | -29.7                     | -19                       | 42.8                      | 17.2                   |

<sup>a</sup>Data are the percent inhibition induced by 10 μM of each respective compound on the specific binding at the screened target. The higher the number the more the radioligand was displaced. The number higher than 50% inhibition is considered meaningful and is shown in **bold** and **highlighted**. <sup>b</sup>**8a** related analogs in **red**. <sup>c</sup>**8i** related analogs in **blue**. <sup>d</sup>**8n** related analogs in **green**. <sup>e</sup>“A-ring” or “D-ring” N-hetero analogs. <sup>f</sup>BZP = benzodiazepine, DOR = δ-opioid receptor, KOR = κ-opioid receptor, MOR = μ-opioid receptor. <sup>o</sup>D-ring “ortho”. <sup>m</sup>D-ring “meta”. <sup>p</sup>D-ring “para”.

**Table S1:** Primary radioligand binding assays. Compound-induced radioligand displacement assays for 46 receptors, transporters and channels conducted by the National Institute of Medical Health Psychoactive Drugs Screening Program (B. Roth et al., UNC, available at <http://pdsp.med.unc.edu>),<sup>a</sup>

| Compound                 | Transporter,<br>Norepinephrine<br>(NET) | Peripheral<br>Benzodiazepine<br>Receptor (PBR) | Transporter,<br>Serotonin<br>(SERT) | Sigma $\sigma_1$             | Sigma $\sigma_2$     |
|--------------------------|-----------------------------------------|------------------------------------------------|-------------------------------------|------------------------------|----------------------|
| Radioligand              | [ <sup>3</sup> H]Nisoxetine             | [ <sup>3</sup> H]PK11195                       | [ <sup>3</sup> H]Citalopram         | [ <sup>3</sup> H]Pentazocine | [ <sup>3</sup> H]DTG |
| <b>8a<sup>p</sup></b>    | 18.1                                    | 8.1                                            | 1.3                                 | -14.2                        | 15.7                 |
| <b>8b<sup>b,p</sup></b>  | 9.6                                     | 8                                              | 7.8                                 | 20                           | 21.2                 |
| <b>8c<sup>b,p</sup></b>  | 21.9                                    | 7.7                                            | 11.4                                | -5.3                         | 20.7                 |
| <b>8d<sup>b,p</sup></b>  | 18.8                                    | 9.2                                            | 16.4                                | -4.3                         | 22.4                 |
| <b>8e<sup>b,m</sup></b>  | 6.1                                     | 8.2                                            | 3.3                                 | -5.1                         | 1                    |
| <b>8f<sup>b,o</sup></b>  | 25.2                                    | -6.3                                           | 13.9                                | 31.4                         | 38.3                 |
| <b>8g<sup>b,m</sup></b>  | 15                                      | 4.8                                            | -12.7                               | 10.6                         | 6                    |
| <b>8h<sup>b,o</sup></b>  | 39.9                                    | 8                                              | 27.7                                | 17.5                         | 29.3                 |
| <b>13a<sup>b,e</sup></b> | 2.1                                     | -0.4                                           | -6.1                                | -13.3                        | 12.2                 |
| <b>13b<sup>b,e</sup></b> | 1.7                                     | 8.7                                            | -20.7                               | -11.5                        | 3.7                  |
| <b>13c<sup>b,e</sup></b> | 5.3                                     | -7.1                                           | 6.3                                 | 15.6                         | 16.5                 |
| <b>13i<sup>b,e</sup></b> | 5.6                                     | 9.9                                            | -1.6                                | 39                           | 16.5                 |
| <b>8i<sup>m</sup></b>    | 27.7                                    | 7.3                                            | 1.4                                 | -2.7                         | 10.8                 |
| <b>8j<sup>c,m</sup></b>  | 0.5                                     | 12                                             | -1.1                                | -3.4                         | -5.7                 |
| <b>8l<sup>c,p</sup></b>  | 20.5                                    | 23                                             | 5.8                                 | -5.4                         | 8.8                  |
| <b>8m<sup>c,o</sup></b>  | 36.6                                    | -1.3                                           | 33.7                                | -7.4                         | 42.2                 |
| <b>13e<sup>c,e</sup></b> | 8.6                                     | 10.7                                           | -1.9                                | -1.5                         | 15.1                 |
| <b>13f<sup>c,e</sup></b> | -3.2                                    | 16.5                                           | -7.5                                | -16.2                        | 28.5                 |
| <b>8n<sup>p</sup></b>    | 21.2                                    | 32.8                                           | 7.1                                 | -5.3                         | 6.8                  |
| <b>8o<sup>d,p</sup></b>  | 3.7                                     | 42.5                                           | 11.2                                | -0.6                         | 4.9                  |
| <b>8p<sup>d,m</sup></b>  | 15.9                                    | 14                                             | 15.2                                | 20                           | -5.5                 |
| <b>8q<sup>d,o</sup></b>  | 29.7                                    | 8.7                                            | 18.6                                | -10.5                        | 26.7                 |
| <b>13g<sup>d,e</sup></b> | -8.3                                    | 2.4                                            | -10                                 | -13.5                        | 15.1                 |
| <b>13h<sup>d,e</sup></b> | -2.8                                    | 17.8                                           | -18.5                               | -7.8                         | 8.8                  |
| <b>8r<sup>p</sup></b>    | 11.3                                    | 20                                             | -6.6                                | -17.8                        | 11.8                 |
| <b>8s<sup>m</sup></b>    | 8.5                                     | 29.6                                           | -10.9                               | -14.1                        | 8.3                  |
| <b>8t<sup>o</sup></b>    | 4.1                                     | 5                                              | -6.1                                | -23.5                        | 15.9                 |

<sup>a</sup>Data are the percent inhibition induced by 10  $\mu$ M of each respective compound on the specific binding at the screened target. The higher the number the more the radioligand was displaced. The number higher than 50% inhibition is considered meaningful and is shown in **bold** and **highlighted**. <sup>b</sup>**8a** related analogs in **red**. <sup>c</sup>**8i** related analogs in **blue**. <sup>d</sup>**8n** related analogs in **green**. <sup>e</sup>“A-ring” or “D-ring” N-hetero analogs. <sup>f</sup>BZP = benzodiazepine, DOR =  $\delta$ -opioid receptor, KOR =  $\kappa$ -opioid receptor, MOR =  $\mu$ -opioid receptor. <sup>o</sup>D-ring “ortho”. <sup>m</sup>D-ring “meta”. <sup>p</sup>D-ring “para”.

**Table S2:** Secondary radioligand binding assays. Binding affinity (K<sub>i</sub>, nM) values obtained from non-linear regression of radioligand competition binding isotherms. Testing conducted by the National Institute of Medical Health Psychoactive Drugs Screening Program (B. Roth et al., UNC, available at <http://pdsp.med.unc.edu>).<sup>a</sup>

| Compound                 | Serotonin<br>5-HT <sub>2B</sub> | Serotonin<br>5-HT <sub>2C</sub> | Serotonin<br>5-HT <sub>7</sub> | BZP <sup>f</sup> Rat Brain<br>Site | Dopamine<br>D <sub>5</sub> |
|--------------------------|---------------------------------|---------------------------------|--------------------------------|------------------------------------|----------------------------|
| <b>8a<sup>p</sup></b>    | NA                              | NA                              | <b>2599.0</b>                  | <b>2.7</b>                         | <b>10,000</b>              |
| <b>8b<sup>b,p</sup></b>  | NA                              | NA                              | <b>2039.0</b>                  | <b>2.1</b>                         | NA                         |
| <b>8c<sup>b,p</sup></b>  | NA                              | NA                              | <b>2616.3</b>                  | <b>2.0</b>                         | NA                         |
| <b>8d<sup>b,p</sup></b>  | NA                              | NA                              | <b>2371.3</b>                  | <b>2.3</b>                         | NA                         |
| <b>8e<sup>b,m</sup></b>  | NA                              | NA                              | NA                             | <b>11.3</b>                        | NA                         |
| <b>8f<sup>b,o</sup></b>  | NA                              | NA                              | NA                             | <b>343.3</b>                       | NA                         |
| <b>8g<sup>b,m</sup></b>  | NA                              | NA                              | NA                             | <b>32.3</b>                        | NA                         |
| <b>8h<sup>b,o</sup></b>  | NA                              | NA                              | NA                             | NA                                 | NA                         |
| <b>13a<sup>b,e</sup></b> | NA                              | NA                              | NA                             | <b>28.3</b>                        | NA                         |
| <b>13b<sup>b,e</sup></b> | NA                              | NA                              | NA                             | <b>21.7</b>                        | NA                         |
| <b>13c<sup>b,e</sup></b> | NA                              | NA                              | NA                             | <b>8.16</b>                        | NA                         |
| <b>13i<sup>b,e</sup></b> | NA                              | NA                              | NA                             | <b>2.6</b>                         | NA                         |
| <b>8i<sup>m</sup></b>    | NA                              | NA                              | NA                             | <b>1.4</b>                         | NA                         |
| <b>8j<sup>c,m</sup></b>  | NA                              | NA                              | NA                             | <b>1.2</b>                         | NA                         |
| <b>8l<sup>c,p</sup></b>  | NA                              | NA                              | NA                             | <b>0.4</b>                         | NA                         |
| <b>8m<sup>c,o</sup></b>  | NA                              | NA                              | NA                             | <b>98.0</b>                        | NA                         |
| <b>13e<sup>c,e</sup></b> | NA                              | NA                              | NA                             | <b>2.0</b>                         | NA                         |
| <b>13f<sup>c,e</sup></b> | NA                              | NA                              | NA                             | <b>2.2</b>                         | NA                         |
| <b>8n<sup>p</sup></b>    | NA                              | NA                              | <b>7603.7</b>                  | <b>12.2</b>                        | NA                         |
| <b>8o<sup>d,p</sup></b>  | <b>5193.0</b>                   | NA                              | <b>5836.3</b>                  | <b>5.5</b>                         | NA                         |
| <b>8p<sup>d,m</sup></b>  | NA                              | NA                              | NA                             | <b>50.4</b>                        | NA                         |
| <b>8q<sup>d,o</sup></b>  | NA                              | <b>10,000</b>                   | NA                             | NA                                 | NA                         |
| <b>13g<sup>d,e</sup></b> | NA                              | <b>10,000</b>                   | NA                             | <b>1.8</b>                         | NA                         |
| <b>13h<sup>d,e</sup></b> | NA                              | NA                              | NA                             | <b>6.2</b>                         | NA                         |
| <b>8r<sup>p</sup></b>    | NA                              | <b>10,000</b>                   | NA                             | <b>0.4</b>                         | <b>10,000</b>              |
| <b>8s<sup>m</sup></b>    | NA                              | NA                              | NA                             | <b>1.6</b>                         | NA                         |
| <b>8t<sup>o</sup></b>    | NA                              | NA                              | NA                             | <b>205.0</b>                       | NA                         |

<sup>a</sup>K<sub>i</sub> values are calculated from best fit IC<sub>50</sub> values using the Cheng-Prusoff equation. Values are an average of n = 3. NA are for compounds/receptors not testing for Primary Screening results of < 50% inhibition (Table S1). <sup>b</sup>8a related analogs in red. <sup>c</sup>8i related analogs in blue. <sup>d</sup>8n related analogs in green. <sup>e</sup>“A-ring” or “D-ring” N-hetero analogs. <sup>f</sup>BZP = benzodiazepine, DOR = δ-opioid receptor, KOR = κ-opioid receptor, MOR = μ-opioid receptor. <sup>o</sup>D-ring “ortho”. <sup>m</sup>D-ring “meta”. <sup>p</sup>D-ring “para”.

**Table S2:** Secondary radioligand binding assays. Binding affinity ( $K_i$ , nM) values obtained from non-linear regression of radioligand competition binding isotherms. Testing conducted by the National Institute of Medical Health Psychoactive Drugs Screening Program (B. Roth et al., UNC, available at <http://pdsp.med.unc.edu>).<sup>a</sup>

| Compound                 | DOR <sup>f</sup> | GABA <sub>A</sub> | Muscarinic M <sub>4</sub> | MOR <sup>f</sup> |
|--------------------------|------------------|-------------------|---------------------------|------------------|
| <b>8a<sup>p</sup></b>    | NA               | NA                | NA                        | NA               |
| <b>8b<sup>b,p</sup></b>  | NA               | NA                | NA                        | <b>3524.3</b>    |
| <b>8c<sup>b,p</sup></b>  | NA               | NA                | NA                        | <b>4431.0</b>    |
| <b>8d<sup>b,p</sup></b>  | NA               | NA                | NA                        | NA               |
| <b>8e<sup>b,m</sup></b>  | NA               | NA                | NA                        | NA               |
| <b>8f<sup>b,o</sup></b>  | NA               | NA                | NA                        | NA               |
| <b>8g<sup>b,m</sup></b>  | NA               | NA                | NA                        | NA               |
| <b>8h<sup>b,o</sup></b>  | NA               | NA                | NA                        | NA               |
| <b>13a<sup>b,e</sup></b> | NA               | NA                | <b>7852.0</b>             | NA               |
| <b>13b<sup>b,e</sup></b> | NA               | NA                | NA                        | NA               |
| <b>13c<sup>b,e</sup></b> | NA               | NA                | NA                        | NA               |
| <b>13i<sup>b,e</sup></b> | NA               | NA                | NA                        | NA               |
| <b>8i<sup>m</sup></b>    | NA               | NA                | NA                        | NA               |
| <b>8j<sup>c,m</sup></b>  | NA               | NA                | NA                        | NA               |
| <b>8l<sup>c,p</sup></b>  | <b>3640.7</b>    | NA                | NA                        | NA               |
| <b>8m<sup>c,o</sup></b>  | NA               | NA                | NA                        | NA               |
| <b>13e<sup>c,e</sup></b> | <b>3820.7</b>    | NA                | NA                        | NA               |
| <b>13f<sup>e,e</sup></b> | <b>8499.3</b>    | NA                | NA                        | NA               |
| <b>8n<sup>p</sup></b>    | NA               | NA                | NA                        | NA               |
| <b>8o<sup>d,p</sup></b>  | NA               | NA                | NA                        | <b>6663.5</b>    |
| <b>8p<sup>d,m</sup></b>  | NA               | NA                | NA                        | NA               |
| <b>8q<sup>d,o</sup></b>  | NA               | NA                | NA                        | NA               |
| <b>13g<sup>d,e</sup></b> | NA               | NA                | NA                        | NA               |
| <b>13h<sup>d,e</sup></b> | NA               | <b>1458.0</b>     | NA                        | NA               |
| <b>8r<sup>p</sup></b>    | NA               | NA                | NA                        | NA               |
| <b>8s<sup>m</sup></b>    | NA               | NA                | NA                        | NA               |
| <b>8t<sup>o</sup></b>    | NA               | NA                | NA                        | NA               |

<sup>a</sup> $K_i$  values are calculated from best fit  $IC_{50}$  values using the Cheng-Prusoff equation. Values are an average of  $n = 3$ . NA are for compounds/receptors not testing for Primary Screening results of  $< 50\%$  inhibition (Table S1). <sup>b</sup>**8a** related analogs in **red**. <sup>c</sup>**8i** related analogs in **blue**. <sup>d</sup>**8n** related analogs in **green**. <sup>e</sup>“A-ring” or “D-ring” N-hetero analogs. <sup>f</sup>BZP = benzodiazepine, DOR =  $\delta$ -opioid receptor, KOR =  $\kappa$ -opioid receptor, MOR =  $\mu$ -opioid receptor. <sup>o</sup>D-ring “ortho”. <sup>m</sup>D-ring “meta”. <sup>p</sup>D-ring “para”.

| Table S3: Results of Cytotoxicity Studies on HEPG2 and HEK293 Cell Lines <sup>a</sup> |                                                         |                                                       |
|---------------------------------------------------------------------------------------|---------------------------------------------------------|-------------------------------------------------------|
| Compound                                                                              | Toxicity in HEK293<br>(Kidney)<br>LD <sub>50</sub> (μM) | Toxicity in HEPG2<br>(Liver)<br>LD <sub>50</sub> (μM) |
| <b>8b</b> <sup>b,p</sup>                                                              | >400                                                    | >400                                                  |
| <b>8c</b> <sup>b,p</sup>                                                              | >400                                                    | >200                                                  |
| <b>8d</b> <sup>b,p</sup>                                                              | >400                                                    | >400                                                  |
| <b>8e</b> <sup>b,m</sup>                                                              | >200                                                    | >200                                                  |
| <b>8f</b> <sup>b,o</sup>                                                              | >400                                                    | >200                                                  |
| <b>13c</b> <sup>b,e</sup>                                                             | >400                                                    | >400                                                  |
| <b>8j</b> <sup>c,m</sup>                                                              | >400                                                    | >400                                                  |
| <b>8l</b> <sup>c,p</sup>                                                              | >400                                                    | >200                                                  |
| <b>8m</b> <sup>c,o</sup>                                                              | >400                                                    | >400                                                  |
| <b>13e</b> <sup>c,e</sup>                                                             | >400                                                    | >400                                                  |
| <b>8o</b> <sup>d,p</sup>                                                              | >400                                                    | >400                                                  |
| <b>13g</b> <sup>d,e</sup>                                                             | >400                                                    | >400                                                  |

<sup>a</sup>Cellular viability studies confirmed that the ligands were not cytotoxic to HEPG2 or HEK293 Cell Lines. The compounds were incubated at different concentrations with specified cells for 48 h, followed by detection of viability using Cell-Titer Glo (Promega). The results were normalized using DMSO (negative) and 3-dibutylamino-1-(4-hexyl-phenyl)-propan-1-one (150 mM in DMSO final concentration, positive). Data were acquired by three independent experiments carried out in quadruplet. <sup>b</sup>**8a** related analogs in **red**. <sup>c</sup>**8i** related analogs in **blue**. <sup>d</sup>**8n** related analogs in **green**. <sup>e</sup>Select “D-ring” N-hetero analogs. <sup>o</sup>D-ring “*ortho*”. <sup>m</sup>D-ring “*meta*”. <sup>p</sup>D-ring “*para*”.

**Figure S1:** Cytotoxicity on HEK293 (Kidney) Cells (left panels: A,C,E) and HEPG2 (Liver) Cells (right panels: B,D,F)<sup>a</sup>

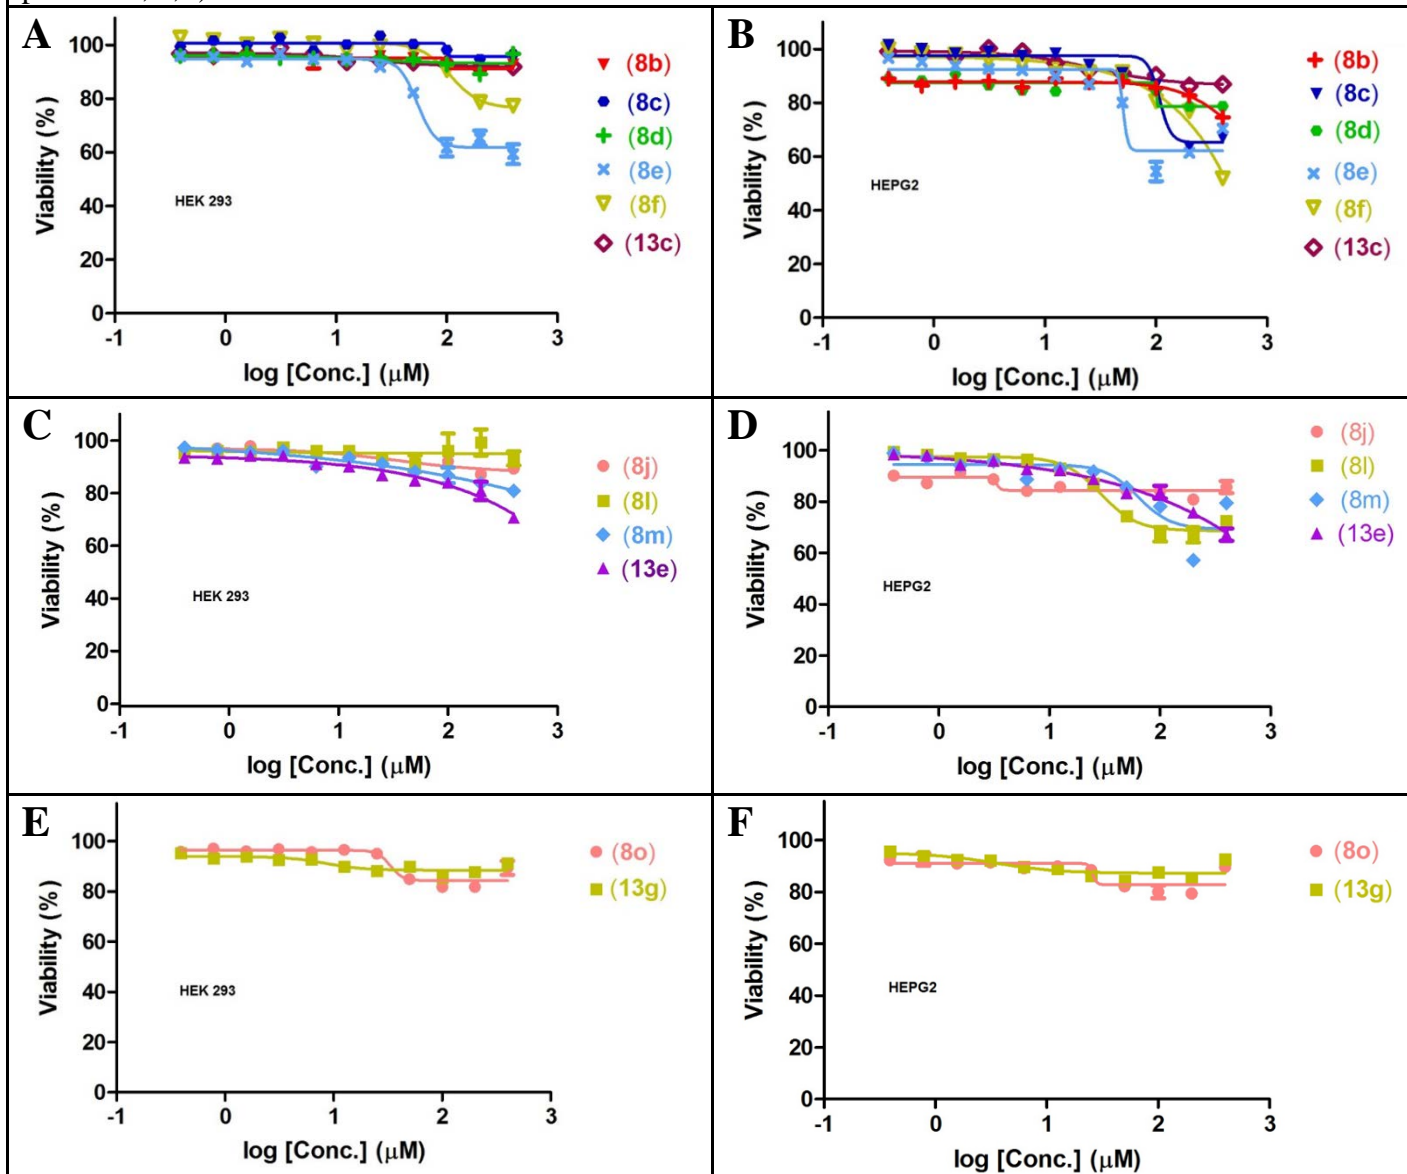

<sup>a</sup>**8a** related analogs (**A, B**). **8i** related analogs (**C, D**). **8n** related analogs (**E, F**). HEK 293 = kidney cells. (A, C, E). HEPG2 = liver cells (**B, D, F**). Cellular viability studies confirmed that the ligands were not cytotoxic to HEPG2 or HEK293 Cell Lines. The compounds were incubated at different concentrations with specified cells for 48 h, followed by detection of viability using Cell-Titer Glo (Promega). The results were normalized using DMSO (negative) and 3-dibutylamino-1-(4-hexyl-phenyl)-propan-1-one (150 mM in DMSO final concentration, positive). Data were acquired by three independent experiments carried out in quadruplet.

**Figure S2:** Effect of Selected Ligands on Motor Coordination<sup>a</sup>

**A**

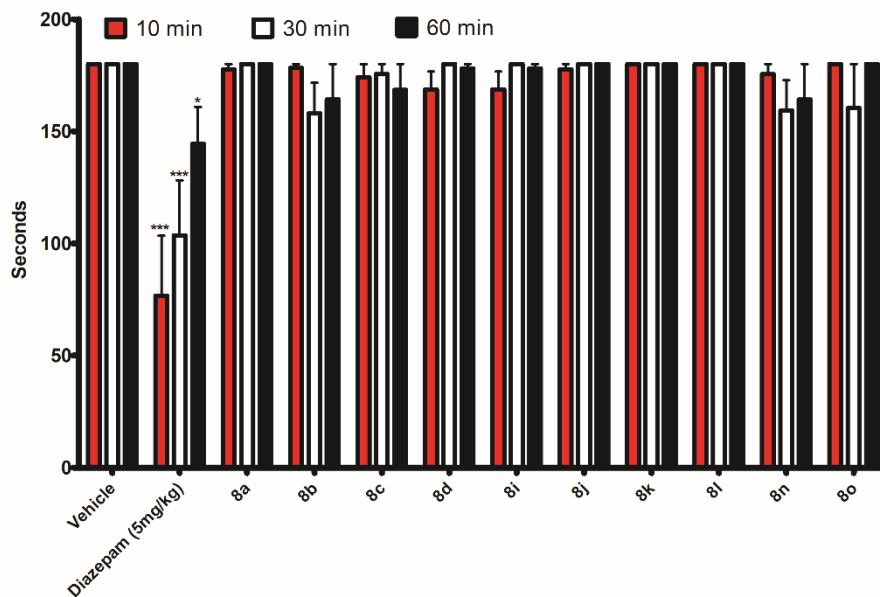

**B**

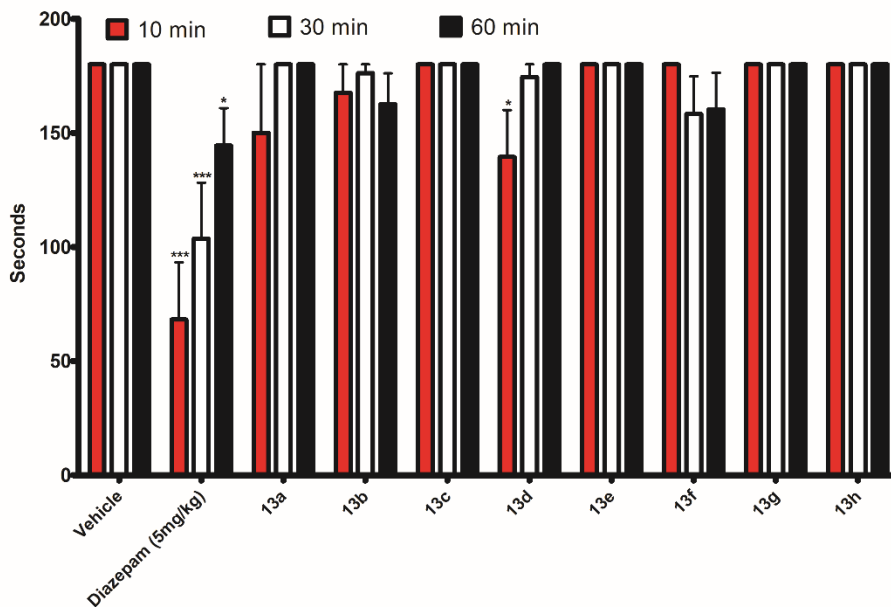

<sup>a</sup>Rotorod studies confirmed that deuteration of the methoxy groups (**A**) and N-hetero substitution and deuteration of the methoxy groups (**B**) of the parent ligands had no effect on motor coordination in contrast to the effects of diazepam at 5mg/kg. Female Swiss Webster mice were tested on a rotarod at 15 rpm for 3 min at 10, 30, and 60 min following compound exposure. Mice (N = 10) received a single injection via oral gavage (PO) of the test compounds (40 mg/kg), diazepam (5 mg/kg), or vehicle (2% polyethylene glycol, 2.5% hydroxypropylmethyl cellulose solution). The time of fall was recorded if it occurred prior to 3 min. Data are expressed as mean  $\pm$  SEM (N = 10). \* (p < 0.05), \*\* (p < 0.01) or \*\*\* (p < 0.001) significance compared to vehicle-treated mice. All compounds dissolved in the oral vehicle.

**Table S4:** Additional Ligands Synthesized via the Chemistry in Scheme S1 for Future SAR Studies<sup>a</sup>

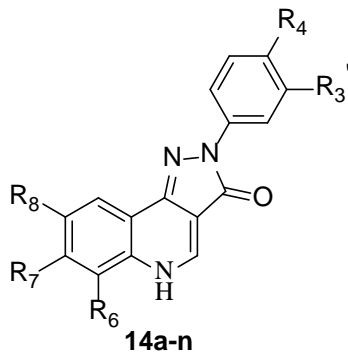

| Compound   | R <sub>8</sub> | R <sub>7</sub>   | R <sub>6</sub>  | R <sub>4</sub> ' | R <sub>3</sub> ' |
|------------|----------------|------------------|-----------------|------------------|------------------|
| <b>14a</b> | H              | OCD <sub>3</sub> | H               | H                | H                |
| <b>14b</b> | H              | OCH <sub>3</sub> | CH <sub>3</sub> | OCH <sub>3</sub> | H                |
| <b>14c</b> | H              | OCH <sub>3</sub> | CH <sub>3</sub> | H                | H                |
| <b>14d</b> | H              | OCH <sub>3</sub> | CH <sub>3</sub> | OCF <sub>3</sub> | H                |
| <b>14e</b> | H              | OCH <sub>3</sub> | H               | OCF <sub>3</sub> | H                |
| <b>14f</b> | Br             | H                | F               | OCH <sub>3</sub> | H                |
| <b>14g</b> | Br             | H                | F               | Cl               | H                |
| <b>14h</b> | Br             | H                | F               | F                | H                |
| <b>14i</b> | H              | CF <sub>3</sub>  | H               | OCH <sub>3</sub> | H                |
| <b>14j</b> | H              | CF <sub>3</sub>  | H               | Cl               | H                |
| <b>14k</b> | H              | CF <sub>3</sub>  | H               | NO <sub>2</sub>  | H                |
| <b>14l</b> | H              | CF <sub>3</sub>  | H               | OCF <sub>3</sub> | H                |
| <b>14m</b> | H              | CF <sub>3</sub>  | H               | F                | H                |
| <b>14n</b> | H              | CF <sub>3</sub>  | H               | H                | OCH <sub>3</sub> |



### Scheme S1: Synthesis of Additional Analogs

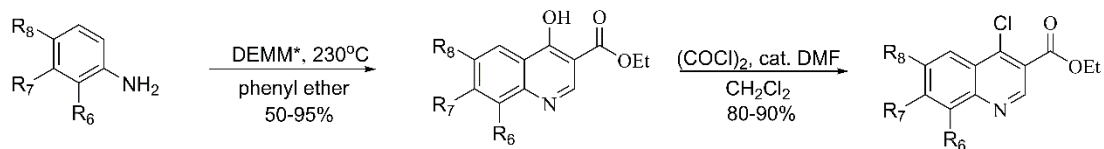

**5g**  $\text{R}_6 = \text{CH}_3$ ,  $\text{R}_7 = \text{OCH}_3$ ,  $\text{R}_8 = \text{H}$

**5h**  $\text{R}_6 = \text{F}$ ,  $\text{R}_7 = \text{H}$ ,  $\text{R}_8 = \text{Br}$

**5i**  $\text{R}_6 = \text{H}$ ,  $\text{R}_7 = \text{CF}_3$ ,  $\text{R}_8 = \text{H}$

**6g**  $\text{R}_6 = \text{CH}_3$ ,  $\text{R}_7 = \text{OCH}_3$ ,  $\text{R}_8 = \text{H}$

**6h**  $\text{R}_6 = \text{F}$ ,  $\text{R}_7 = \text{H}$ ,  $\text{R}_8 = \text{Br}$

**6i**  $\text{R}_6 = \text{H}$ ,  $\text{R}_7 = \text{CF}_3$ ,  $\text{R}_8 = \text{H}$

**7g**  $\text{R}_6 = \text{CH}_3$ ,  $\text{R}_7 = \text{OCH}_3$ ,  $\text{R}_8 = \text{H}$

**7h**  $\text{R}_6 = \text{F}$ ,  $\text{R}_7 = \text{H}$ ,  $\text{R}_8 = \text{Br}$

**7i**  $\text{R}_6 = \text{H}$ ,  $\text{R}_7 = \text{CF}_3$ ,  $\text{R}_8 = \text{H}$

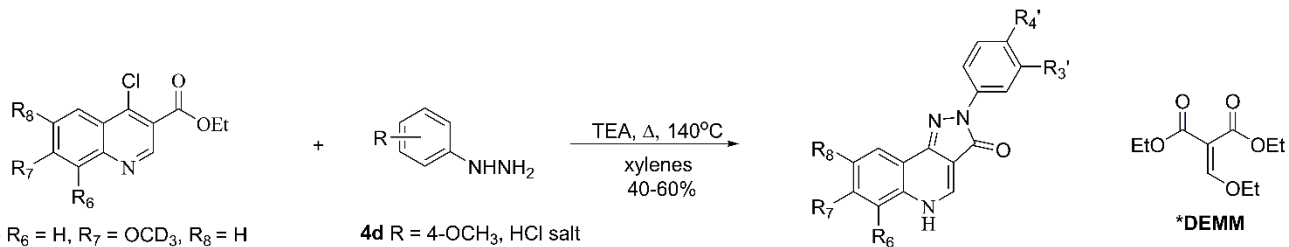

**7b**  $\text{R}_6 = \text{H}$ ,  $\text{R}_7 = \text{OCD}_3$ ,  $\text{R}_8 = \text{H}$

**7e**  $\text{R}_6 = \text{H}$ ,  $\text{R}_7 = \text{OCH}_3$ ,  $\text{R}_8 = \text{H}$

**7g**  $\text{R}_6 = \text{CH}_3$ ,  $\text{R}_7 = \text{OCH}_3$ ,  $\text{R}_8 = \text{H}$

**7h**  $\text{R}_6 = \text{F}$ ,  $\text{R}_7 = \text{H}$ ,  $\text{R}_8 = \text{Br}$

**7i**  $\text{R}_6 = \text{H}$ ,  $\text{R}_7 = \text{CF}_3$ ,  $\text{R}_8 = \text{H}$

**4d**  $\text{R} = 4\text{-OCH}_3$ , HCl salt

**4e**  $\text{R} = 3\text{-OCH}_3$ , HCl salt

**4f**  $\text{R} = 4\text{-OCF}_3$ , HCl salt

**4h**  $\text{R} = 4\text{-Cl}$ , HCl salt

**4i**  $\text{R} = 4\text{-F}$ , HCl salt

**4j**  $\text{R} = 4\text{-NO}_2$ , HCl salt

**4k**  $\text{R} = \text{H}$ , HCl salt

## Supporting Experimental

**Chemistry.** All reactions were performed in oven-dried round-bottom flasks with magnetic stir bars or overhead mechanical stirrers under an argon atmosphere unless the reaction conditions were supposed to contain water. Organic solvents were purified when necessary by standard methods<sup>36</sup> or purchased from Sigma-Aldrich.<sup>TM</sup> Chemicals were purchased from either Sigma Aldrich<sup>TM</sup>, Oakwood Chemical, Alfa Aesar, Matrix Scientific, or Acros Organic. The progress of the reactions was monitored by TLC on a silica gel plate (25% EtOAc in hexanes or 10% MeOH in DCM). The <sup>1</sup>H and <sup>13</sup>C NMR data were obtained on Bruker Spectrospin 300 MHz and GE 500 MHz instruments with the chemical shifts in  $\delta$  (ppm) reported relative to TMS. The HRMS spectral data was obtained on a LCMS-IT-TOF by Shimadzu Scientific. Purity of all final compounds was 98% or higher and was determined by HPLC on a LC-MS with Shimadzu LCMS 2020, (Shimadzu Scientific Instruments, Columbia, MD) using a PDA detector at 254 nm. The column was a Shimadzu C18 3  $\mu$ m 50 x 4.6mm reversed phase LC column. LC mobile phase: 90% acetonitrile (w/ 0.1% TFA) and 10% H<sub>2</sub>O (w/ 0.1% TFA) with a flow rate of 1 mL min<sup>-1</sup>, column temperature: 25 °C, injection size: 1.0 $\mu$ L.

**Ethyl 4-hydroxy-7-methoxy-8-methyl quinoline-3-carboxylate (6g).** A mixture of 3-methoxy-2-methylaniline **5g** (25 g, 182.2 mmol), diethyl ethoxymethylenemalonate (39.4 g, 182.2 mmol) and diphenyl ether (100 mL) was slowly heated to 230 °C. The EtOH, which evolved, was collected in a Dean-Stark trap. Once the EtOH formation had ceased, the reaction mixture was heated for an additional 30 min at 230 °C. The reaction mixture was then cooled to 80 °C and diluted with ethanol (100 mL). Upon cooling to 20-25 °C the solid, which formed,

was collected by filtration and washed with ethanol (50 mL x 2) and then hexanes (50 mL x 2). The solid was dried under vacuum at 40 °C to afford **6g** as a light brown solid (41.9 g, 88%); <sup>1</sup>H NMR (300 MHz, TFA) δ 11.66 (s, 1H), 9.13 (s, 1H), 8.53 (d, *J* = 9.3 Hz, 1H), 7.60 (d, *J* = 9.4 Hz, 1H), 4.60 (q, *J* = 7.1 Hz, 2H), 4.11 (s, 3H), 2.52 (s, 3H), 1.46 (t, *J* = 7.1 Hz, 3H); <sup>13</sup>C NMR (75 MHz, TFA) δ 172.57, 167.57, 164.66, 144.78, 139.23, 124.90, 114.60, 114.12, 113.61, 102.73, 64.14, 55.62, 11.94, 6.58; HRMS (ESI) *m/z* calculated for C<sub>14</sub>H<sub>16</sub>NO<sub>4</sub> (M+H)<sup>+</sup> 262.1074; found 262.1097.

**Ethyl 6-bromo-8-fluoro-4-hydroxyquinoline-3-carboxylate (6h).** A mixture of 4-bromo-2-fluoroaniline **5h** (10 g, 52.6 mmol), diethyl ethoxymethylenemalonate (11.4 g, 52.6 mmol) and diphenyl ether (40 mL) was slowly heated to 230 °C. The EtOH, which evolved, was collected in a Dean-Stark trap. Once the EtOH formation had ceased, the reaction mixture was heated for an additional 30 min at 230 °C. The reaction mixture was then cooled to 80 °C and diluted with ethanol (40 mL). Upon cooling to 20-25 °C the solid, which formed, was collected by filtration and washed with ethanol (10 mL x 2) and then hexanes (10 mL x 2). The solid was dried under vacuum at 40 °C to afford **6h** as a light brown solid (41.9 g, 88%); <sup>1</sup>H NMR (300 MHz, TFA) δ 11.65 (s, 1H), 9.37 (s, 1H), 8.61 (s, 1H), 8.07 (d, *J* = 9.3 Hz, 1H), 4.68 (q, *J* = 7.0 Hz, 2H), 1.52 (t, *J* = 7.1 Hz, 3H); <sup>13</sup>C NMR (75 MHz, TFA) δ 172.48 (s), 166.96 (s), 151.48 (d, <sup>1</sup>*J*<sub>CF</sub> = 261.7 Hz), 145.48 (s), 128.08 (d, <sup>2</sup>*J*<sub>CF</sub> = 14.9 Hz), 125.44 (d, <sup>2</sup>*J*<sub>CF</sub> = 19.3 Hz), 124.22 (d, <sup>3</sup>*J*<sub>CF</sub> = 8.1 Hz), 123.00 (d, <sup>3</sup>*J*<sub>CF</sub> = 4.7 Hz), 121.87 (s), 106.18 (s), 65.01 (s), 11.92 (s); HRMS (ESI) *m/z* calculated for C<sub>12</sub>H<sub>10</sub>BrFNO<sub>3</sub> (M+H)<sup>+</sup> 313.9823; found 313.9822.

**Ethyl 4-hydroxy-7-(trifluoromethyl)quinoline-3-carboxylate (6i).** A mixture of 3-(trifluoromethyl)aniline **5i** (25 g, 155.1 mmol), diethyl ethoxymethylenemalonate (33.6 g, 155.1

mmol) and diphenyl ether (100 mL) was slowly heated to 230 °C. The EtOH, which evolved, was collected in a Dean-Stark trap. Once the EtOH formation had ceased, the reaction mixture was heated for an additional 30 min at 230 °C. The reaction mixture was then cooled to 80 °C and diluted with ethanol (100 mL). Upon cooling to 20-25 °C the solid, which formed, was collected by filtration and washed with ethanol (25 mL x 2) and then hexanes (25 mL x 2). The solid was dried under vacuum at 40 °C to afford **6i** as an off-white solid (35.6 g, 80%); <sup>1</sup>H NMR (300 MHz, TFA) δ 11.65 (s, 1H), 9.44 (s, 1H), 8.81 (d, *J* = 8.7 Hz, 1H), 8.50 (s, 1H), 8.16 (d, *J* = 8.7 Hz, 1H), 4.68 (q, *J* = 7.1 Hz, 2H), 1.52 (t, *J* = 7.1 Hz, 3H); <sup>13</sup>C NMR (75 MHz, TFA) δ 173.51 (s), 167.08 (s), 146.62 (s), 139.51 (q, <sup>2</sup>*J*<sub>CF</sub> = 35.7 Hz), 138.80 (s), 126.21 (s), 125.92 (q, <sup>3</sup>*J*<sub>CF</sub> = 2.9 Hz), 121.94 (q, <sup>1</sup>*J*<sub>CF</sub> = 263.7 Hz), 121.61 (s), 117.70 (q, <sup>3</sup>*J*<sub>CF</sub> = 4.0 Hz), 105.92 (s), 64.87 (s), 11.91 (s); HRMS (ESI) *m/z* calculated for C<sub>13</sub>H<sub>11</sub>F<sub>3</sub>NO<sub>3</sub> (M+H)<sup>+</sup> 286.0686; found 286.0688.

**Ethyl 4-chloro-7-methoxy-8-methyl quinoline-3-carboxylate (7g).** A mixture of ethyl-4-hydroxy-7-methoxy-8-methyl quinoline-3-carboxylate **6g** (41.0 g, 156.9 mmol), N,N-dimethylformamide (0.5 mL, 6.5 mmol), and DCM (500 mL) was heated to 35-40°C. Oxalyl chloride (21.9 g, 172.6 mmol) was added dropwise to the reaction mixture over 30 min. The reaction mixture was heated for 6 h at reflux (38-40 °C). The pale yellow solution, which resulted, was then allowed to cool to 20-25 °C. The reaction mixture was brought to pH = 10 (pH paper) by slowly adding a 25% solution of aq potassium carbonate (62.5 g) in H<sub>2</sub>O (250 mL). The layers were then separated and the aq layer was extracted with DCM (250 mL). The combined organic layers were then washed with a 25% solution of aq potassium carbonate (62.5 g) in H<sub>2</sub>O (250 mL). The combined organic layers were dried (MgSO<sub>4</sub>). The solvents were then removed under reduced pressure and the residue was slurried with cold hexanes (200 mL). The

solid, which formed, was filtered and washed with cold hexanes (50 mL x 2). The solid was dried under vacuum at 40 °C to afford **7g** as an off-white solid (42.9 g, 97%); <sup>1</sup>H NMR (300 MHz, CDCl<sub>3</sub>) δ 9.21 (s, 1H), 8.27 (d, *J* = 9.4 Hz, 1H), 7.41 (d, *J* = 9.4 Hz, 1H), 4.49 (q, *J* = 7.1 Hz, 2H), 4.02 (s, 3H), 2.66 (s, 3H), 1.46 (t, *J* = 7.1 Hz, 3H); <sup>13</sup>C NMR (75 MHz, CDCl<sub>3</sub>) δ 164.78, 159.33, 149.82, 149.23, 143.84, 124.25, 122.51, 120.88, 119.92, 114.35, 61.74, 56.20, 14.25, 10.00; HRMS (ESI) *m/z* calculated for C<sub>14</sub>H<sub>15</sub>ClNO<sub>3</sub> (M+H)<sup>+</sup> 280.0735; found 280.0746.

**Ethyl 6-bromo-4-chloro-8-fluoroquinoline-3-carboxylate (7h).** A mixture of ethyl-6-bromo-4-hydroxy-8-fluoro quinoline-3-carboxylate **6h** (11.0 g, 35.0 mmol), *N,N*-dimethylformamide (0.1 mL, 1.3 mmol), and DCM (200 mL) was heated to 35-40°C. Oxalyl chloride (4.9 g, 38.5 mmol) was added dropwise to the reaction mixture over 30 min. The reaction mixture was heated for 6 h at reflux (38-40 °C). The pale yellow solution, which resulted, was then allowed to cool to 20-25 °C. The reaction mixture was brought to pH = 10 (pH paper) by slowly adding a 25% solution of aq potassium carbonate (25 g) in H<sub>2</sub>O (100 mL). The layers were then separated and the aq layer was extracted with DCM (100 mL). The combined organic layers were then washed with a 25% solution of aq potassium carbonate (25 g) in H<sub>2</sub>O (100 mL). The combined organic layers were dried (MgSO<sub>4</sub>). The solvents were then removed under reduced pressure and the residue was slurried with cold hexanes (50 mL). The solid, which formed, was filtered and washed with cold hexanes (10 mL x 2). The solid was dried under vacuum at 40 °C to afford **7h** as a pale yellow solid (9.7 g, 83%); <sup>1</sup>H NMR (300 MHz, CDCl<sub>3</sub>) δ 9.21 (s, 1H), 8.36 (d, *J* = 1.3 Hz, 1H), 7.68 (dd, *J* = 9.1, 1.6 Hz, 1H), 4.52 (q, *J* = 7.1 Hz, 2H), 1.48 (t, *J* = 7.1 Hz, 3H); <sup>13</sup>C NMR (75 MHz, CDCl<sub>3</sub>) δ 163.79 (s), 157.55 (d, <sup>1</sup>*J*<sub>CF</sub> = 263.7 Hz), 150.38 (s), 142.17 (s), 138.63 (d, <sup>2</sup>*J*<sub>CF</sub> = 12.4 Hz), 128.50 (s), 124.90 (s), 123.64 (d, <sup>3</sup>*J*<sub>CF</sub> = 5.0 Hz), 121.59 (d, <sup>3</sup>*J*<sub>CF</sub> = 9.4 Hz),

120.15 (d,  $^2J_{CF} = 22.0$  Hz), 62.54 (s), 14.21 (s); HRMS (ESI) m/z calculated for  $C_{12}H_9BrClFNO_2$  (M+H)<sup>+</sup> 331.9484; found 331.9485.

**Ethyl 4-chloro-7-(trifluoromethyl)quinoline-3-carboxylate (7i).** A mixture of ethyl-4-hydroxy-7-(trifluoromethyl)quinoline-3-carboxylate **6i** (35.0 g, 122.7 mmol), N,N-dimethylformamide (0.5 mL, 6.5 mmol), and DCM (500 mL) was heated to 35-40°C. Oxalyl chloride (17.1 g, 135.0 mmol) was added dropwise to the reaction mixture over 30 min. The reaction mixture was heated for 6 h at reflux (38-40 °C). The pale yellow solution, which resulted, was then allowed to cool to 20-25 °C. The reaction mixture was brought to pH = 10 (pH paper) by slowly adding a 25% solution of aq potassium carbonate (62.5 g) in H<sub>2</sub>O (250 mL). The layers were then separated and the aq layer was extracted with DCM (250 mL). The combined organic layers were then washed with a 25% solution of aq potassium carbonate (62.5 g) in H<sub>2</sub>O (250 mL). The combined organic layers were dried (MgSO<sub>4</sub>). The solvents were then removed under reduced pressure and the residue was slurried with cold hexanes (50 mL). The solid, which formed, was filtered and washed with cold hexanes (10 mL x 2). The solid was dried under vacuum at 40 °C to afford **7i** as an off-white solid (26.1 g, 70%); <sup>1</sup>H NMR (300 MHz, CDCl<sub>3</sub>) δ 9.28 (s, 1H), 8.54 (d,  $J = 8.8$  Hz, 1H), 8.45 (s, 1H), 7.87 (dd,  $J = 8.8, 1.6$  Hz, 1H), 4.53 (q,  $J = 7.1$  Hz, 2H), 1.49 (t,  $J = 7.1$  Hz, 3H); <sup>13</sup>C NMR (75 MHz, CDCl<sub>3</sub>) δ 163.98 (s), 151.40 (s), 148.60 (s), 143.38 (s), 133.46 (q,  $^2J_{CF} = 33.1$  Hz), 127.80 (s), 127.64 (q,  $^3J_{CF} = 4.4$  Hz), 126.90 (s), 124.65 (s), 123.97 (q,  $^3J_{CF} = 3.0$  Hz), 123.41 (q,  $^1J_{CF} = 272.9$  Hz), 62.44 (s), 14.20 (s); HRMS (ESI) m/z calculated for  $C_{13}H_{10}ClF_3NO_2$  (M+H)<sup>+</sup> 304.0347; found 304.0344.

**7-Methoxy-*d*<sub>3</sub>-2-phenyl-2,5-dihydro-3H-pyrazolo[4,3-*c*]quinolin-3-one (14a).** A mixture of ethyl-4-chloro-7-methoxy-*d*<sub>3</sub>-quinoline-3-carboxylate **7b** (2.0 g, 7.4 mmol), phenylhydrazine hydrochloride **4k** (1.29g, 89.3 mmol), and triethylamine (1.8 g, 17.8 mmol) in xylenes (16mL) was heated to reflux (138°C) for 2 hr. The yellow-orange slurry, which resulted, was cooled to 100 °C and diluted with EtOH (16 mL). The reaction mixture was heated at reflux at 80°C for 30 min and then allowed to cool to 20-25°C. The solids, which remained, were collected by filtration and washed with a 1:1 mixture of EtOH (2.5 mL x 2) and hexanes (2.5 mL x 2) and then washed with hexanes (5 mL x 2). The solid was dried under vacuum at 40 °C to afford **14a** as a yellow powder (1.7g, 78%): <sup>1</sup>H NMR (300 MHz, DMSO) δ 12.63 (s, 1H), 8.68 (s, 1H), 8.21 (d, *J* = 8.0 Hz, 2H), 8.12 (d, *J* = 9.1 Hz, 1H), 7.43 (t, *J* = 7.6 Hz, 2H), 7.16 (t, *J* = 7.4 Hz, 3H); <sup>13</sup>C NMR (75 MHz, DMSO) δ 162.05, 160.97, 143.55, 140.62, 139.61, 137.56, 129.11, 124.24, 124.12, 118.98, 115.82, 112.62, 106.79, 102.31; HRMS (ESI) *m/z* calculated for C<sub>17</sub>H<sub>11</sub>D<sub>3</sub>N<sub>3</sub>O<sub>2</sub> (M+H)<sup>+</sup> 295.1274; found 295.1272; HPLC purity, 99.9%.

**7-Methoxy-2-(4-methoxyphenyl)-6-methyl-2,5-dihydro-3H-pyrazolo[4,3-*c*]quinolin-3-one (14b).** A mixture of ethyl 4-chloro-7-methoxy-8-methylquinoline-3-carboxylate **7g** (2 g, 7.1 mmol), 4-methoxyphenylhydrazine hydrochloride **4d** (1.5 g, 8.6 mmol), triethylamine (1.7 g, 17.2 mmol) and xylenes (16 mL) was heated to reflux (138 °C) and held at reflux for 2 h. The yellow-orange slurry, which resulted, was cooled to 100 °C and diluted with EtOH (16 mL). The reaction mixture was heated at reflux at 80°C for 30 min and then allowed to cool to 20-25 °C. The solids, which remained, were collected by filtration and washed with a 1:1 mixture of EtOH (2.5 mL x 2) and hexanes (2.5 mL x 2) and then washed with hexanes (5 mL x 2). The solid was dried under vacuum at 40 °C to afford **14b** as a yellow powder (1.7 g, 70%): <sup>1</sup>H NMR (300 MHz, DMSO) δ 11.80 (s, 1H), 8.37 (s, 1H), 8.08 (dd, *J* = 8.9, 5.1 Hz, 3H), 7.29 (d, *J* = 9.0 Hz, 1H),

7.01 (d,  $J = 9.1$  Hz, 2H), 3.92 (s, 3H), 3.78 (s, 3H), 2.36 (s, 3H);  $^{13}\text{C}$  NMR (75 MHz, DMSO)  $\delta$  161.39, 158.24, 156.22, 143.58, 139.11, 135.37, 134.09, 121.18, 120.66, 114.33, 114.25, 112.80, 111.11, 106.53, 56.65, 55.68, 10.03; HRMS (ESI)  $m/z$  calculated for  $\text{C}_{19}\text{H}_{18}\text{N}_3\text{O}_3$  ( $\text{M}+\text{H}$ ) $^+$  336.1343; found 336.1342; HPLC purity, 97.8%.

**7-Methoxy-6-methyl-2-phenyl-2,5-dihydro-3H-pyrazolo[4,3-c]quinolin-3-one (14c).** A mixture of ethyl 4-chloro-7-methoxy-8-methylquinoline-3-carboxylate **7g** (2 g, 7.1 mmol), phenylhydrazine hydrochloride **4k** (1.2 g, 8.6 mmol), triethylamine (1.7 g, 17.2 mmol) and xylenes (16 mL) was heated to reflux (138 °C) and held at reflux for 2 h. The yellow-orange slurry, which resulted, was cooled to 100 °C and diluted with EtOH (16 mL). The reaction mixture was heated at reflux at 80 °C for 30 min and then allowed to cool to 20-25 °C. The solids, which remained, were collected by filtration and washed with a 1:1 mixture of EtOH (2.5 mL x 2) and hexanes (2.5 mL x 2) and then washed with hexanes (5 mL x 2). The solid was dried under vacuum at 40 °C to afford **14c** as a yellow powder (2.0 g, 92%):  $^1\text{H}$  NMR (500 MHz, DMSO)  $\delta$  11.86 (s, 1H), 8.42 (s, 1H), 8.22 (d,  $J = 8.2$  Hz, 2H), 8.11 (d,  $J = 8.8$  Hz, 1H), 7.45 (t,  $J = 7.9$  Hz, 2H), 7.33 (d,  $J = 8.9$  Hz, 1H), 7.17 (t,  $J = 7.3$  Hz, 1H), 3.95 (s, 3H), 2.39 (s, 3H);  $^{13}\text{C}$  NMR (126 MHz, DMSO)  $\delta$  162.00, 158.41, 144.04, 140.60, 139.43, 135.49, 129.15, 124.29, 121.32, 118.98, 114.42, 112.77, 111.22, 106.48, 56.71, 10.08; HRMS (ESI)  $m/z$  calculated for  $\text{C}_{18}\text{H}_{16}\text{N}_3\text{O}_2$  ( $\text{M}+\text{H}$ ) $^+$  306.1243; found 306.1237; HPLC purity, 99.8%.

**7-Methoxy-6-methyl-2-(4-(trifluoromethoxy)phenyl)-2,5-dihydro-3H-pyrazolo[4,3-c]quinolin-3-one (14d).** A mixture of ethyl 4-chloro-7-methoxy-8-methylquinoline-3-



carboxylate **7g** (2 g, 7.1 mmol), 4-(trifluoromethoxy)phenylhydrazine hydrochloride **4f** (2.0 g, 8.6 mmol), triethylamine (1.7 g, 17.2 mmol) and xylenes (16 mL) was heated to reflux (138 °C) and held at reflux for 2 h. The yellow-orange slurry, which resulted, was cooled to 100 °C and diluted with EtOH (16 mL). The reaction mixture was heated at reflux at 80°C for 30 min and then allowed to cool to 20-25 °C. The solids, which remained, were collected by filtration and washed with a 1:1 mixture of EtOH (2.5 mL x 2) and hexanes (2.5 mL x 2) and then washed with hexanes (5 mL x 2). The solid was dried under vacuum at 40 °C to afford **14d** as a yellow powder (1.9 g, 97%): <sup>1</sup>H NMR (300 MHz, DMSO) δ 11.87 (s, 1H), 8.34 (dd, *J* = 16.0, 11.7 Hz, 3H), 8.07 (d, *J* = 8.7 Hz, 1H), 7.44 (d, *J* = 8.0 Hz, 2H), 7.29 (d, *J* = 8.8 Hz, 1H), 3.92 (s, 3H), 2.35 (s, 3H); <sup>13</sup>C NMR (75 MHz, DMSO) δ 162.09 (s), 158.47 (s), 144.48 (s), 144.41 (s), 139.63 (s), 139.57 (s), 135.45 (s), 121.97 (s), 121.29 (s), 120.66 (q, <sup>1</sup>*J*<sub>CF</sub> = 256.6 Hz), 120.09 (s), 114.44 (s), 112.60 (s), 111.22 (s), 106.09 (s), 56.64 (s), 10.01 (s); HRMS (ESI) *m/z* calculated for C<sub>19</sub>H<sub>15</sub>F<sub>3</sub>N<sub>3</sub>O<sub>3</sub> (M+H)<sup>+</sup> 390.1066; found 390.1068; HPLC purity, 99.9%.

**7-Methoxy-2-(4-(trifluoromethoxy)phenyl)-2,5-dihydro-3H-pyrazolo[4,3-c]quinolin-3-one 14e**. A mixture of ethyl-4-chloro-7-methoxyquinoline-3-carboxylate **7e** (2 g, 7.5 mmol), 4-(trifluoromethoxy)phenylhydrazine hydrochloride **4f** (2.1 g, 9.0 mmol), triethylamine (1.8, 18.1 mmol) and xylenes (16 mL) was heated to reflux (138 °C) and held at reflux for 2 h. The yellow-orange slurry, which resulted, was cooled to 100 °C and diluted with EtOH (16 mL). The reaction mixture was heated at reflux at 80°C for 30 min and then allowed to cool to 20-25 °C. The solids, which remained, were collected by filtration and washed with a 1:1 mixture of EtOH (2.5 mL x 2) and hexanes (2.5 mL x 2) and then washed with hexanes (5 mL x 2). The solid was dried under vacuum at 40 °C to afford **14e** as a yellow powder (1.9 g, 67%): <sup>1</sup>H NMR (300

MHz, DMSO)  $\delta$  12.71 (s, 1H), 8.71 (s, 1H), 8.33 (s, 2H), 8.12 (s, 1H), 7.45 (s, 2H), 7.18 (s, 2H), 3.88 (s, 3H);  $^{13}\text{C}$  NMR (75 MHz, DMSO)  $\delta$  162.18, 161.10, 144.50, 144.48, 143.97, 139.93, 139.60, 137.61, 124.15, 121.98, 120.12, 115.95, 112.52, 106.45, 102.37, 56.00; HRMS (ESI)  $m/z$  calculated for  $\text{C}_{18}\text{H}_{13}\text{F}_3\text{N}_3\text{O}_3$  (M+H) $^+$  376.0909; found 376.0914; HPLC purity, 99.9%.

**8-Bromo-6-fluoro-2-(4-methoxyphenyl)-2,5-dihydro-3H-pyrazolo[4,3-c]quinolin-3-one**

**(14f).** A mixture of ethyl 6-bromo-4-chloro-8-fluoroquinoline-3-carboxylate **7h** (0.5 g, 1.5 mmol), (4-methoxyphenyl)hydrazine hydrochloride **4d** (0.31 g, 1.8 mmol), and triethylamine (2 mL) in xylenes (8 mL) was heated to reflux (138°C) for 4 hr. The reaction was cooled to rt and filtered. The solid, which formed, was washed several times with hexane and water. Then, the solid was dissolved in a basic solution of 3 N NaOH and stirred for 15 min. The basic solution was brought to pH = 7 (pH paper) with 3 N HCl and filtered. The solid was recrystallized using hot ethanol and dried in vacuo to afford a yellow solid **14f**, (0.28 g, 48%): mp 333-334°C;  $^1\text{H}$  NMR (300 MHz, DMSO)  $\delta$  13.05 (s, 1H), 8.51 (s, 1H), 8.09 (s, 1H), 8.03 (d,  $J = 8.9$  Hz, 2H), 7.89 (d,  $J = 10.5$  Hz, 1H), 7.01 (d,  $J = 9.0$  Hz, 2H), 3.78 (s, 3H);  $^{13}\text{C}$  NMR (75 MHz, DMSO)  $\delta$  161.11 (s), 156.65 (s), 152.72 (d,  $^1J_{\text{CF}} = 254.3$  Hz), 140.93 (s), 139.49 (s), 133.57 (s), 124.28 (d,  $^2J_{\text{CF}} = 13.7$  Hz), 122.02 (s), 121.00 (s), 120.62 (d,  $^3J_{\text{CF}} = 2.4$  Hz), 118.96 (d,  $^2J_{\text{CF}} = 20.5$  Hz), 118.28 (d,  $^3J_{\text{CF}} = 9.0$  Hz), 114.32 (s), 107.83 (s), 55.73 (s); HRMS (ESI)  $m/z$  calculated for  $\text{C}_{17}\text{H}_{12}\text{BrFN}_3\text{O}_2$  (M+H) $^+$  388.0097; found 388.0094; HPLC purity, 98.4%.

**8-Bromo-2-(4-chlorophenyl)-6-fluoro-2,5-dihydro-3H-pyrazolo[4,3-c]quinolin-3-one (14g).**

A mixture of ethyl 6-bromo-4-chloro-8-fluoroquinoline-3-carboxylate **7h** (0.2 g, 0.64 mmol), (4-chlorophenyl)hydrazine hydrochloride **4g** (0.18 g, 1.2 mmol), and triethylamine (2 mL) in

xylenes (8 mL) was heated to reflux (138°C) for 4 hr. The reaction was cooled to rt and filtered. The solid, which formed, was collected by filtration and washed with hexane and water. The solid was dissolved in DMSO (10mL). The solution was then poured into H<sub>2</sub>O (30mL), and filtered in order to remove the triethylamine hydrochloride salt. After this, a recrystallization using EtOH (15mL) and H<sub>2</sub>O (2mL) was employed to afford yellow crystals **14g**, (0.17 g, 70%): <sup>1</sup>H NMR (300 MHz, DMSO) δ 12.96 (s, 1H), 8.49 (s, 1H), 8.18 (d, *J* = 8.4 Hz, 2H), 8.04 (s, 1H), 7.86 (d, *J* = 10.5 Hz, 1H), 7.46 (d, *J* = 8.5 Hz, 2H); <sup>13</sup>C NMR (75 MHz, DMSO) δ 161.66 (s), 152.70 (d, <sup>1</sup>*J*<sub>CF</sub> = 254.4 Hz), 141.68 (s), 139.92 (s), 138.99 (s), 129.07 (s), 128.48 (s), 124.50 (d, <sup>2</sup>*J*<sub>CF</sub> = 13.3 Hz), 121.86 (d, <sup>4</sup>*J*<sub>CF</sub> = 3.3 Hz), 120.70 (d, <sup>3</sup>*J*<sub>CF</sub> = 3.6 Hz), 120.35 (s), 119.19 (d, <sup>2</sup>*J*<sub>CF</sub> = 20.3 Hz), 118.40 (d, <sup>3</sup>*J*<sub>CF</sub> = 9.3 Hz), 107.55 (s); HRMS (ESI) *m/z* calculated for C<sub>16</sub>H<sub>9</sub>BrClFN<sub>3</sub>O (M+H)<sup>+</sup> 391.9596; found 391.9599; HPLC purity, 99.9%.

**8-Bromo-6-fluoro-2-(4-fluorophenyl)-2,5-dihydro-3H-pyrazolo[4,3-c]quinolin-3-one (14h).**

A mixture of ethyl 6-bromo-4-chloro-8-fluoroquinoline-3-carboxylate **7h** (0.2 g, 0.64 mmol), (4-fluorophenyl)hydrazine hydrochloride **4h** (0.22 g, 1.3 mmol) and triethylamine (2 mL) in xylenes (8mL) was heated to reflux (138°C) for 4 hr. The reaction was cooled to rt and filtered. The solid, which formed, was collected by filtration and washed with hexane and water. After this, a recrystallization using EtOH (15mL) and H<sub>2</sub>O (2mL) was employed to afford yellow crystals **14h**, (0.120 g, 50 %): <sup>1</sup>H NMR (300 MHz, DMSO) δ 12.99 (s, 1H), 8.50 (s, 1H), 8.28 – 8.10 (m, 2H), 8.05 (s, 1H), 7.88 (d, *J* = 10.4 Hz, 1H), 7.27 (t, *J* = 8.7 Hz, 2H); <sup>13</sup>C NMR (75 MHz, DMSO) δ 161.45 (s), 159.29 (d, <sup>1</sup>*J*<sub>CF</sub> = 241.3 Hz), 152.72 (d, <sup>1</sup>*J*<sub>CF</sub> = 255.0 Hz), 141.38 (d, <sup>4</sup>*J*<sub>CF</sub> = 2.5 Hz), 139.88 (d, <sup>4</sup>*J*<sub>CF</sub> = 2.8 Hz), 136.64 (d, <sup>4</sup>*J*<sub>CF</sub> = 2.3 Hz), 124.42 (d, <sup>2</sup>*J*<sub>CF</sub> = 12.4 Hz), 121.95 (d, <sup>4</sup>*J*<sub>CF</sub> = 3.0 Hz), 120.96 (d, <sup>3</sup>*J*<sub>CF</sub> = 8.0 Hz), 120.69 (d, <sup>3</sup>*J*<sub>CF</sub> = 3.1 Hz), 119.17 (d, <sup>2</sup>*J*<sub>CF</sub> =

22.2 Hz), 118.40 (d,  $^3J_{CF} = 8.9$  Hz), 115.84 (d,  $^2J_{CF} = 22.3$  Hz), 107.65 (s); HRMS (ESI) m/z calculated for  $C_{16}H_9BrF_2N_3O$  (M+H)<sup>+</sup> 375.9892; found 375.9891; HPLC purity, 99.9%.

**2-(4-Methoxyphenyl)-7-(trifluoromethyl)-2,5-dihydro-3H-pyrazolo[4,3-c]quinolin-3-one**

**(14i).** A mixture of ethyl 4-chloro-7-(trifluoromethyl)quinoline-3-carboxylate **7i** (0.5 g, 1.5 mmol), (4-methoxyphenyl)hydrazine hydrochloride **4d** (0.57 g, 1.8 mmol), and triethylamine (2 mL) in xylenes (8mL) was heated to reflux (138°C) for 4 hr. The reaction was cooled to rt and filtered. The solid, which formed, was collected by filtration and washed with hexane and water. After this, a recrystallization using EtOH (15mL) and H<sub>2</sub>O (2mL) was employed to afford yellow crystals **14i**, (0.51 g, 82 %): mp 315 – 316°C; <sup>1</sup>H NMR (300 MHz, DMSO) δ 12.93 (s, 1H), 8.84 (s, 1H), 8.40 (d, J = 8.4 Hz, 1H), 8.08 (d, J = 9.1 Hz, 2H), 8.03 (s, 1H), 7.83 (d, J = 8.1 Hz, 1H), 7.03 (d, J = 9.1 Hz, 2H), 3.79 (s, 3H); <sup>13</sup>C NMR (75 MHz, DMSO) δ 161.38 (s), 156.60 (s), 141.99 (s), 140.79 (s), 135.83 (s), 133.75 (s), 130.02 (q,  $^2J_{CF} = 32.5$  Hz), 124.15 (q,  $^1J_{CF} = 272.7$  Hz), 124.05 (s), 122.66 (q,  $^3J_{CF} = 3.3$  Hz), 122.12 (s), 121.00 (s), 117.21 (q,  $^3J_{CF} = 4.2$  Hz), 114.34 (s), 107.42 (s), 55.71 (s); HRMS (ESI) m/z calculated for  $C_{18}H_{13}F_3N_3O_2$  (M+H)<sup>+</sup> 360.0954; found 360.0956; HPLC purity, 99.9%.

**2-(4-Chlorophenyl)-7-(trifluoromethyl)-2,5-dihydro-3H-pyrazolo[4,3-c]quinolin-3-one (14j).**

A mixture of ethyl 4-chloro-7-(trifluoromethyl)quinoline-3-carboxylate **7i** (0.5 g, 1.6 mmol), (4-chlorophenyl)hydrazine hydrochloride **4g** (0.47 g, 3.2 mmol), and triethylamine (2 mL) in xylenes (8mL) was heated to reflux (138°C) for 4 hr. The reaction was cooled to rt and filtered. The solid, which formed, was collected by filtration and washed with hexane and water. After this, a recrystallization using EtOH (15mL) and H<sub>2</sub>O (2mL) was employed to afford yellow crystals **14j**, (0.44 g, 75%): mp 346 – 347°C; <sup>1</sup>H NMR (300 MHz, DMSO) δ 12.98 (s, 1H), 8.84 (s, 1H), 8.34

(d,  $J = 8.3$  Hz, 1H), 8.21 (d,  $J = 8.9$  Hz, 2H), 7.98 (s, 1H), 7.80 (d,  $J = 8.3$  Hz, 1H), 7.47 (d,  $J = 8.9$  Hz, 2H);  $^{13}\text{C}$  NMR (75 MHz, DMSO)  $\delta$  161.92 (s), 142.71 (s), 141.03 (s), 139.11 (s), 135.84 (s), 130.29 (q,  $^2J_{\text{CF}} = 32.5$  Hz), 129.08 (s), 128.45 (s), 124.11 (s), 124.08 (q,  $^1J_{\text{CF}} = 272.8$  Hz), 122.73 (q,  $^3J_{\text{CF}} = 3.8$  Hz), 121.92 (s), 120.40 (s), 117.15 (q,  $^3J_{\text{CF}} = 4.2$  Hz), 107.15 (s); HRMS (ESI)  $m/z$  calculated for  $\text{C}_{17}\text{H}_{10}\text{ClF}_3\text{N}_3\text{O}$  ( $\text{M}+\text{H}$ ) $^+$  364.0459; found 364.0453; HPLC purity, 99.8%.

**2-(4-Nitrophenyl)-7-(trifluoromethyl)-2,5-dihydro-3H-pyrazolo[4,3-c]quinolin-3-one (14k).**

A mixture of ethyl 4-chloro-7-(trifluoromethyl)quinoline-3-carboxylate **7i** (1.0 g, 3.3 mmol), (4-nitrophenyl)hydrazine hydrochloride **4i** (0.75 g, 3.9 mmol), and triethylamine (0.80g, 7.9 mmol) in xylenes (8 mL) was heated to reflux (138 °C) and held at reflux for 2 h. The yellow-orange slurry, which resulted, was cooled to 100 °C and diluted with EtOH (8 mL). The reaction mixture was heated at reflux at 80°C for 30 min and then allowed to cool to 20-25 °C. The solids, which remained, were collected by filtration and washed with a 1:1 mixture of EtOH (2.5 mL x 2) and hexanes (2.5 mL x 2) and then washed with hexanes (5 mL x 2). The solid was dried under vacuum at 40 °C to afford **14k** as a yellow powder (0.7 g, 57%): mp > 350 °C;  $^1\text{H}$  NMR (300 MHz, DMSO)  $\delta$  13.73 (s, 1H), 8.74 (s, 1H), 8.35 (d,  $J = 9.0$  Hz, 2H), 8.24 (dd,  $J = 17.0, 8.7$  Hz, 3H), 8.11 (s, 1H), 7.75 (d,  $J = 8.3$  Hz, 1H);  $^{13}\text{C}$  NMR (75 MHz, DMSO)  $\delta$  162.70 (s), 145.21 (s), 144.09 (s), 142.95 (s), 141.13 (s), 136.15 (s), 130.50 (q,  $^2J_{\text{CF}} = 33.2$  Hz), 125.16 (s), 124.14 (s), 123.99 (q,  $^1J_{\text{CF}} = 272.3$  Hz), 122.78 (q,  $^3J_{\text{CF}} = 3.7$  Hz), 121.66 (s), 118.06 (s), 117.31 (q,  $^3J_{\text{CF}} = 3.7$  Hz), 106.46 (s); HRMS (ESI)  $m/z$  calculated for  $\text{C}_{17}\text{H}_{10}\text{F}_3\text{N}_4\text{O}_3$  ( $\text{M}+\text{H}$ ) $^+$  375.0700; found 375.0706; HPLC purity, 99.9%.

**2-(4-(Trifluoromethoxy)phenyl)-7-(trifluoromethyl)-2,5-dihydro-3H-pyrazolo[4,3-**

**c]quinolin-3-one 14l).** A mixture of ethyl 4-chloro-7-(trifluoromethyl)-quinoline-3-carboxylate

**7i** (0.3 g, 1 mmol), (4-(trifluoromethoxy)phenyl)hydrazine hydrochloride **4f** (0.48 g, 2 mmol), and triethylamine (2 mL) in xylenes (8 mL) of xylene was heated to reflux (138°C) for 4 hr. The reaction was cooled to rt and filtered. The solid, which formed, was washed several times with hexane and water. Then, the solid was dissolved in a basic solution of 3 N NaOH and stirred for 15 min. The basic solution was brought to pH = 7 (pH paper) with 3 N aq HCl and filtered. The solid was recrystallized using hot ethanol and dried in vacuo to afford a yellow solid **14l**, (0.25 g, 60%): mp 286 – 287°C; <sup>1</sup>H NMR (300 MHz, DMSO) δ 12.94 (s, 1H), 8.86 (s, 1H), 8.36 (d, *J* = 8.4 Hz, 1H), 8.29 (d, *J* = 9.0 Hz, 2H), 7.99 (s, 1H), 7.81 (d, *J* = 8.3 Hz, 1H), 7.43 (d, *J* = 8.8 Hz, 2H); <sup>13</sup>C NMR (75 MHz, DMSO) δ 161.98 (s), 144.85 (s), 142.85 (s), 141.22 (s), 139.27 (s), 135.96 (s), 130.33 (q, <sup>2</sup>*J*<sub>CF</sub> = 33.0 Hz), 124.12 (s), 124.09 (q, <sup>1</sup>*J*<sub>CF</sub> = 272.4 Hz), 122.78 (s), 122.29 (q, <sup>3</sup>*J*<sub>CF</sub> = 3.2 Hz), 121.98 (s), 120.64 (q, <sup>1</sup>*J*<sub>CF</sub> = 255.2 Hz), 120.37 (s), 117.26 (q, <sup>3</sup>*J*<sub>CF</sub> = 5.3 Hz), 107.07 (s); HRMS (ESI) *m/z* calculated for C<sub>18</sub>H<sub>10</sub>F<sub>6</sub>N<sub>3</sub>O<sub>2</sub> (M+H)<sup>+</sup> 414.0672; found 414.0674; HPLC purity, 99.7%.

**2-(4-Fluorophenyl)-7-(trifluoromethyl)-2,5-dihydro-3H-pyrazolo[4,3-c]quinolin-3-one**

**(14m)**. A mixture of ethyl 4-chloro-7-(trifluoromethyl)quinoline-3-carboxylate **7i** (0.2 g, 0.66 mmol), (4-fluorophenyl)hydrazine hydrochloride **4h** (0.22 g, 1.3 mmol), and triethylamine (2 mL) in xylenes (8 mL) of xylene was heated to reflux (138°C) for 4 hr. The reaction was cooled to rt and filtered. The solid, which formed, was collected by filtration and washed with hexane and water. After this, a recrystallization using EtOH (15mL) and H<sub>2</sub>O (2mL) was employed to afford yellow crystals **14m**, (0.15 g, 65%) which were finally obtained by recrystallization from hot EtOH: mp 296 – 297 °C; <sup>1</sup>H NMR (300 MHz, DMSO) δ 12.98 (s, 1H), 8.84 (s, 1H), 8.36 (d, *J* = 8.3 Hz, 1H), 8.19 (dd, *J* = 9.0, 5.1 Hz, 2H), 8.00 (s, 1H), 7.81 (d, *J* = 8.4 Hz, 1H), 7.27 (t, *J* =

8.9 Hz, 2H);  $^{13}\text{C}$  NMR (75 MHz, DMSO)  $\delta$  161.69 (s), 159.26 (d,  $^1J_{\text{CF}} = 241.2$  Hz), 142.41 (s), 140.94 (s), 136.76 (d,  $^3J_{\text{CF}} = 2.5$  Hz), 135.78 (s), 130.21 (q,  $^2J_{\text{CF}} = 32.4$  Hz), 124.09 (q,  $^1J_{\text{CF}} = 272.3$  Hz), 124.07 (s), 122.73 (q,  $^3J_{\text{CF}} = 3.0$  Hz), 121.98 (d,  $^4J_{\text{CF}} = 0.6$  Hz), 120.97 (d,  $^3J_{\text{CF}} = 7.9$  Hz), 117.14 (q,  $^3J_{\text{CF}} = 3.9$  Hz), 115.80 (d,  $^2J_{\text{CF}} = 22.4$  Hz), 107.21 (s); HRMS (ESI)  $m/z$  calculated for  $\text{C}_{17}\text{H}_{10}\text{F}_4\text{N}_3\text{O}$  ( $\text{M}+\text{H}$ ) $^+$  348.0755; found 348.0766; HPLC purity, 99.8%.

**2-(3-Methoxyphenyl)-7-(trifluoromethyl)-2,5-dihydro-3H-pyrazolo[4,3-c]quinolin-3-one**

**(14n).** A mixture of ethyl 4-chloro-7-(trifluoromethyl)quinoline-3-carboxylate **7i** (0.5 g, 1.6 mmol), (3-methoxyphenyl)hydrazine hydrochloride **4e** (0.575 g, 4.1 mmol), and triethylamine (2 mL) in xylenes (15mL) was heated to reflux (138°C) for 4 hr. The reaction was cooled to rt and filtered. The solid, which formed, was collected by filtration and washed with hexane and water. After this, a recrystallization using EtOH (15mL) and H<sub>2</sub>O (2mL) was employed to afford yellow crystals **14n**, (0.762 g, 46 %): mp > 350 °C;  $^1\text{H}$  NMR (300 MHz, DMSO)  $\delta$  12.94 (s, 1H), 8.84 (s, 1H), 8.40 (d,  $J = 8.3$  Hz, 1H), 8.02 (s, 1H), 7.89 – 7.71 (m, 3H), 7.35 (t,  $J = 8.2$  Hz, 1H), 6.78 (dd,  $J = 8.2, 1.9$  Hz, 1H), 3.81 (s, 3H);  $^{13}\text{C}$  NMR (75 MHz, DMSO)  $\delta$  161.97 (s), 159.98 (s), 142.41 (s), 141.40 (s), 140.97 (s), 135.93 (s), 130.23 (q,  $^2J_{\text{CF}} = 31.5$  Hz), 130.06 (s), 124.18 (s), 124.11 (q,  $^1J_{\text{CF}} = 270.8$  Hz), 122.75 (q,  $^3J_{\text{CF}} = 3.8$  Hz), 122.04 (s), 117.21 (q,  $^3J_{\text{CF}} = 4.4$  Hz), 111.50 (s), 110.14 (s), 107.40 (s), 105.01 (s), 55.58 (s); HRMS (ESI)  $m/z$  calculated for  $\text{C}_{18}\text{H}_{13}\text{F}_3\text{N}_3\text{O}_2$  ( $\text{M}+\text{H}$ ) $^+$  360.0954; found 360.0958; HPLC purity, 99.6%.

# Human Liver Microsomal Assay

Principal Investigator: Dr. Alexander Arnold

Operator: Revathi Kodali

Test Compound: **8a**

Concentration: 10  $\mu$ M

Date: 02-16-2015

Facility: Milwaukee Institute for Drug Discovery

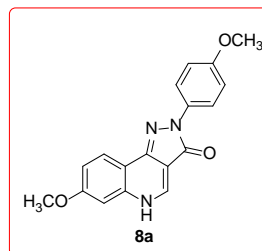

## Assay Protocol

Each evaluation included six independent assays carried out three at a time, on two different days

1. Preparation of solutions:
  - a. 1 mM test compound in Acetonitrile.
  - b. 0.5  $\mu$ M Verapamil in Acetonitrile (ACN) as internal standard (store on ice).
2. For a total volume of Microsomal Assay Mixture (MAM) 390  $\mu$ L, sufficient for seven time points, combine the following
  - a. 282  $\mu$ L of 18.2 m $\Omega$  of water.
  - b. 80  $\mu$ L of 0.5 M potassium phosphate buffer ( $\text{pH}$  7.4)
  - c. 20  $\mu$ L of NADPH A. (Corning life sciences, Cat # 451220)
  - d. 4  $\mu$ L of NADPH B. (Corning life sciences, Cat # 451200)
  - e. 4  $\mu$ L of test compound.
3. Sonicate MAM for 5 min and meanwhile thaw microsomes (20 mg/mL) (BD Gentest, Cat # 452156) on ice.
4. Aliquot 48.75  $\mu$ L of MAM into separate Eppendorf 1.5 mL vials and label them the time points for 0, 10, 20, 30, 40, 50, and 60 min.
5. Arrange the timer. Microsomes should be added to all time points except the zero time point.
6. For each time point add 1.25  $\mu$ L microsomes (Final concentration of 0.5 mg/mL) and place in the incubator (37  $^{\circ}$ C) and record the time.
7. At the end of each time interval add 100  $\mu$ L of ice cold Verapamil solution in ACN and sonicate for 10 sec and spin down at 10,000 rpm for 5 minutes.
8. Take 100  $\mu$ L of supernatant and transfer to Spin-X HPLC filter tubes (Corning Incorporated, Cat # 8169) and centrifuge at 13,000 rpm for 5 minutes and take 5  $\mu$ L from this solution and dilute in 500  $\mu$ L of LCMS grade methanol (Fischer scientific, CAS # 67-56-1) in a 2mL glass auto sampler vial (Microsolv, Cat # 95025-WCV)
9. The samples are analyzed by LCMS-8040. (Shimadzu)



**Data:**

Day 1:

| Time (min) | Assay 1             |                     | Assay 2             |                     | Assay 3             |                     | % remaining |         |         |
|------------|---------------------|---------------------|---------------------|---------------------|---------------------|---------------------|-------------|---------|---------|
|            | PZ-II-029 Peak area | Verapamil Peak area | PZ-II-029 Peak area | Verapamil Peak area | PZ-II-029 Peak area | Verapamil Peak area | Assay 1     | Assay 2 | Assay 3 |
| 0          | 33951               | 601221              | 32355               | 541076              | 43992               | 555548              | 100.83      | 99.66   | 100.23  |
| 10         | 42583               | 640770              | 15626               | 226765              | 42530               | 564189              | 118.67      | 114.84  | 95.42   |
| 20         | 38151               | 561437              | 41959               | 594788              | 46868               | 582371              | 121.34      | 117.57  | 101.87  |
| 30         | 40481               | 622191              | 28975               | 614244              | 42095               | 608270              | 116.18      | 78.62   | 87.60   |
| 40         | 37748               | 595368              | 36594               | 602489              | 41311               | 584370              | 113.21      | 101.23  | 89.48   |
| 50         | 33524               | 640546              | 38790               | 658705              | 36637               | 554181              | 93.45       | 98.14   | 83.68   |
| 60         | 25781               | 629252              | 38607               | 576764              | 39742               | 602548              | 73.16       | 99.66   | 83.48   |

Table 1: Peak areas and % remaining values

Day 2:

| Time (min) | Assay 1             |                     | Assay 2             |                     | Assay 3             |                     | (% remaining) |         |         |
|------------|---------------------|---------------------|---------------------|---------------------|---------------------|---------------------|---------------|---------|---------|
|            | PZ-II-029 Peak area | Verapamil Peak area | PZ-II-029 Peak area | Verapamil Peak area | PZ-II-029 Peak area | Verapamil Peak area | Assay 1       | Assay 2 | Assay 3 |
| 0          | 226304              | 837974              | 251250              | 676349              | 221151              | 719623              | 100.02        | 100.12  | 100.10  |
| 10         | 222165              | 845586              | 197063              | 750089              | 248601              | 823455              | 97.30         | 70.81   | 98.33   |
| 20         | 222847              | 820071              | 215134              | 732628              | 230949              | 796583              | 100.64        | 79.15   | 94.43   |
| 30         | 229722              | 686761              | 240649              | 736344              | 239432              | 735694              | 123.88        | 88.09   | 106.01  |
| 40         | 182530              | 767280              | 224208              | 775342              | 244256              | 778429              | 88.10         | 77.94   | 102.20  |
| 50         | 178928              | 748120              | 181502              | 692046              | 161580              | 705574              | 88.58         | 70.69   | 74.59   |
| 60         | 202738              | 761042              | 225933              | 676351              | 190088              | 732573              | 98.66         | 90.04   | 84.52   |

Table 2: Peak areas and % remaining values

**Calculation:**

From the peak area, Calculate the following

$$\text{Peak area ratio} = \frac{\text{Peak area of test compound (PZ-II-029)}}{\text{Peak area of internal standard (Verapamil)}}$$

$$\% \text{ remaining at time T} = \frac{\text{Peak area ratio at particular time T}}{\text{Peak area ratio at zero time point}} * 100$$

(T = 0, 10, 20,30,40,50 and 60)

## DATA ANALYSIS:

### Day 1

Linear regression analysis:

Slope:  $-0.003961 \pm 0.001458$

At X= 60, Y =  $4.465 \pm 0.05385$

$R^2 = 0.2909$

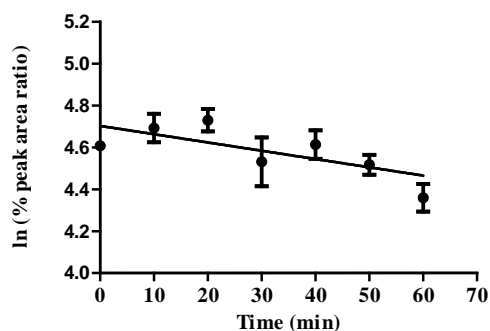

### Day 2

Linear regression analysis:

Slope:  $-0.02768 \pm 0.00138$

At X = 60, Y =  $4.446 \pm 0.04892$

$R^2 = 0.1807$

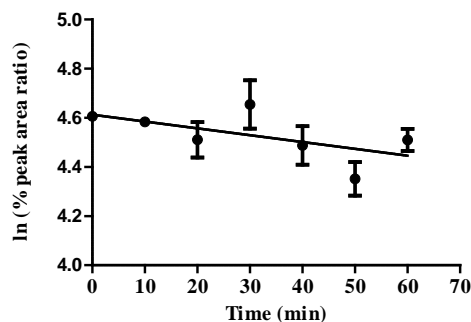

Metabolic Parameters:

Half-life: 175 min

$V_d$ : 100  $\mu$ L/mg

Intrinsic clearance: 0.4  $\mu$ L/min/mg

Metabolic Rate: 8 nmol/min/mg

% remaining at 60 min:  $87 \pm 1.0$  %

Metabolic Parameters:

Half-life: 250 min

$V_d$ : 100  $\mu$ L/mg

Intrinsic clearance: 0.277  $\mu$ L/min/mg

Metabolic Rate: 5.6 nmol/min/mg

% remaining at 60 min:  $85.2 \pm 1.0$  %

Note: The peak area ratios and natural log values are calculated using Microsoft excel 2010 and linear regression analysis is calculated using GraphPad prism.

# Mouse Liver Microsomal Assay

Principal Investigator: Dr. Alexander Arnold

Operator: Revathi Kodali

Test Compound: **8a**

Concentration: 10  $\mu$ M

Date: 04-08-2016

Facility: Milwaukee Institute for Drug Discovery

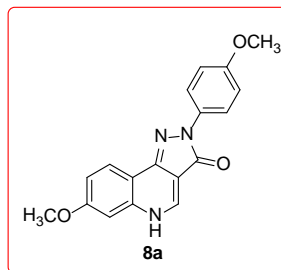

## Assay Protocol

Each evaluation included six independent assays carried out three at a time, on two different days

1. Preparation of solutions:
  - a. 1 mM test compound in DMSO.
  - b. 1  $\mu$ M Verapamil in Acetonitrile (ACN) as internal standard (store on ice).
2. For a total volume of Microsomal Assay Mixture (MAM) 390  $\mu$ L, sufficient for seven time points, combine the following
  - a. 282  $\mu$ L of 18.2 m $\Omega$  of water.
  - b. 80  $\mu$ L of 0.5 M potassium phosphate buffer (p<sup>H</sup> 7.4)
  - c. 20  $\mu$ L of NADPH A. (Corning life sciences, Cat # 451220)
  - d. 4  $\mu$ L of NADPH B. (Corning life sciences, Cat # 451200)
  - e. 4  $\mu$ L of test compound.
3. Sonicate MAM for 5 min and meanwhile thaw microsomes (20 mg/mL) (Life technologies, Cat # MSMC-PL) on ice.
4. Aliquot 100  $\mu$ L of ice cold ISTD into seven separate 1.5 mL conical vials and label them the time points for 0, 10, 20, 30, 40, 50, and 60 min.
5. Arrange the timer. Microsomes (Final concentration of 0.5 mg/mL) should be added to all time points except the zero time point.
6. Add 50  $\mu$ L of the MAM solution to the conical vial labelled as zero time point. Place the remaining MAM solution in the incubator (37 °C) for 5 min and initiate the reaction with addition of microsomes (8.8  $\mu$ L) and record the time.
7. At the end of each time interval remove 50  $\mu$ L and add to 100  $\mu$ L ISTD in conical vial, sonicate for 10 sec and spin down at 10,000 rpm for 5 minutes.
8. Take 100  $\mu$ L of supernatant and transfer to Spin-X HPLC filter tubes (Corning Incorporated, Cat # 8169) and centrifuge at 13,000 rpm for 5 minutes and take 5  $\mu$ L from this solution and dilute in 495  $\mu$ L of LCMS grade methanol (Fischer scientific, CAS # 67-56-1) in a 2mL glass auto sampler vial (Microsolv, Cat # 95025-WCV)
9. The samples are analyzed by LCMS-8040. (Shimadzu)

**Data:**

Day 1:

| Time (min) | Assay 1             |                     | Assay 2             |                     | Assay 3             |                     | % remaining |         |         |
|------------|---------------------|---------------------|---------------------|---------------------|---------------------|---------------------|-------------|---------|---------|
|            | PZ-II-029 Peak area | Verapamil Peak area | PZ-II-029 Peak area | Verapamil Peak area | PZ-II-029 Peak area | Verapamil Peak area | Assay 1     | Assay 2 | Assay 3 |
| 0          | 447665              | 859377              | 462433              | 863304              | 455184              | 863057              | 99.98       | 99.93   | 100.07  |
| 10         | 432708              | 843709              | 436278              | 848682              | 438533              | 859089              | 98.43       | 95.90   | 96.86   |
| 20         | 414199              | 856316              | 434993              | 857592              | 430385              | 861791              | 92.84       | 94.63   | 94.76   |
| 30         | 397811              | 862960              | 404695              | 858362              | 401549              | 865308              | 88.48       | 87.96   | 88.05   |
| 40         | 383712              | 861536              | 396789              | 858415              | 389825              | 856243              | 85.48       | 86.23   | 86.39   |
| 50         | 364496              | 848736              | 391027              | 856027              | 379552              | 864618              | 82.42       | 85.22   | 83.29   |
| 60         | 375359              | 853833              | 383683              | 870545              | 376641              | 877200              | 84.37       | 82.22   | 81.47   |

Table 1: Peak areas and % remaining values

Day 2:

| Time (min) | Assay 1             |                     | Assay 2             |                     | Assay 3             |                     | (% remaining) |         |         |
|------------|---------------------|---------------------|---------------------|---------------------|---------------------|---------------------|---------------|---------|---------|
|            | PZ-II-029 Peak area | Verapamil Peak area | PZ-II-029 Peak area | Verapamil Peak area | PZ-II-029 Peak area | Verapamil Peak area | Assay 1       | Assay 2 | Assay 3 |
| 0          | 505767              | 866531              | 461889              | 859715              | 473978              | 852607              | 99.94         | 100.04  | 99.98   |
| 10         | 485169              | 856481              | 449512              | 852390              | 461313              | 862061              | 96.99         | 98.20   | 96.24   |
| 20         | 455571              | 855136              | 424509              | 861092              | 444556              | 853068              | 91.22         | 91.80   | 93.72   |
| 30         | 434369              | 864280              | 404785              | 855574              | 412379              | 864451              | 86.05         | 88.10   | 85.79   |
| 40         | 423412              | 862610              | 394944              | 852059              | 407802              | 865784              | 84.05         | 86.31   | 84.71   |
| 50         | 394408              | 857542              | 382714              | 861341              | 396913              | 870869              | 78.75         | 82.74   | 81.97   |
| 60         | 403745              | 856301              | 375242              | 858103              | 397021              | 854640              | 80.73         | 81.43   | 83.55   |

Table 2: Peak areas and % remaining values

**Calculation:**

From the peak area, Calculate the following

$$\text{Peak area ratio} = \frac{\text{Peak area of test compound (PZ-II-029)}}{\text{Peak area of internal standard (Verapamil)}}$$

$$\% \text{ remaining at time T} = \frac{\text{Peak area ratio at particular time T}}{\text{Peak area ratio at zero time point}} * 100$$

(T = 0, 10, 20,30,40,50 and 60)

## DATA ANALYSIS:

### Day 1

Linear regression analysis:

Slope:  $-0.003424 \pm 0.0001769$

At X= 60, Y =  $4.397 \pm 0.006377$

$R^2 = 0.9517$

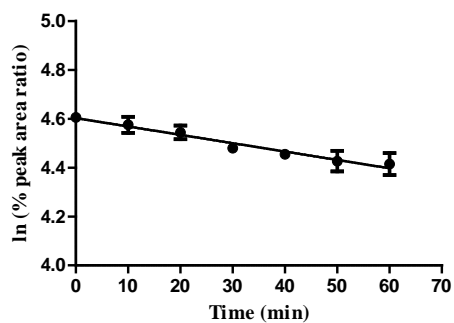

Metabolic Parameters:

Half-life:  $202.39 \pm 10.45$  min

$V_d$ :  $100 \mu\text{L}/\text{mg}$

Intrinsic clearance:  $0.3424 \mu\text{L}/\text{min}/\text{mg}$

Metabolic Rate:  $6.848 \text{ nmol}/\text{min}/\text{mg}$

% remaining at 60 min:  $81.20 \pm 0.12$  %

Note: The peak area ratios and natural log values are calculated using Microsoft excel 2010 and linear regression analysis is calculated using GraphPad prism.

### Day 2

Linear regression analysis:

Slope:  $-0.003723 \pm 0.0002476$

At X = 60, Y =  $4.376 \pm 0.008927$

$R^2 = 0.9225$

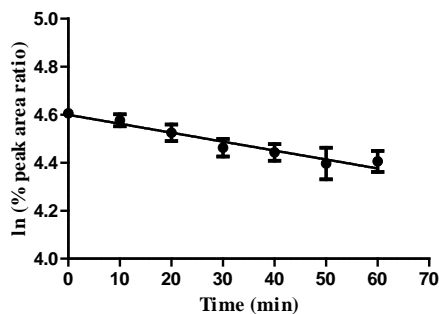

Metabolic Parameters:

Half-life:  $186.14 \pm 12.37$  min

$V_d$ :  $100 \mu\text{L}/\text{mg}$

Intrinsic clearance:  $0.3723 \mu\text{L}/\text{min}/\text{mg}$

Metabolic Rate:  $7.446 \text{ nmol}/\text{min}/\text{mg}$

% remaining at 60 min:  $79.51 \pm 0.16$  %

# Human Liver Microsomal Assay

Principal Investigator: Dr. Alexander Arnold

Operator: Revathi Kodali

Test Compound: **8b**

Concentration: 10  $\mu$ M

Date: 05-04-2016

Facility: Milwaukee Institute for Drug Discovery

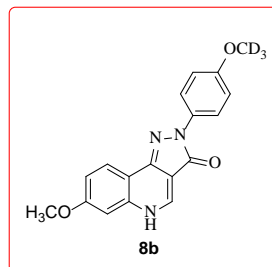

## Assay Protocol

Each evaluation included six independent assays carried out three at a time, on two different days

1. Preparation of solutions:
  - a. 1 mM test compound in DMSO.
  - b. 2  $\mu$ M 4,5 Diphenyl Imidazole ice cold Acetonitrile (ISTD).
2. For a total volume of Microsomal Assay Mixture (MAM) 390  $\mu$ L, sufficient for seven time points, combine the following
  - a. 282  $\mu$ L of 18.2 m $\Omega$  of water.
  - b. 80  $\mu$ L of 0.5 M potassium phosphate buffer (p<sup>H</sup> 7.4)
  - c. 20  $\mu$ L of NADPH A. (Corning life sciences, Cat # 451220)
  - d. 4  $\mu$ L of NADPH B. (Corning life sciences, Cat # 451200)
  - e. 4  $\mu$ L of test compound.
3. Sonicate MAM for 5 min and meanwhile thaw microsomes (20 mg/mL) (BD Gentest, Cat # 452156) on ice.
4. Aliquot 100  $\mu$ L of ice cold ISTD into seven separate 1.5 mL conical vials and label them the time points for 0, 10, 20, 30, 40, 50, and 60 min.
5. Arrange the timer. Microsomes (Final concentration of 0.5 mg/mL) should be added to all time points except the zero time point.
6. Add 50  $\mu$ L of the MAM solution to the conical vial labelled as zero time point. Place the remaining MAM solution in the incubator (37 °C) for 5 min and initiate the reaction with addition of microsomes (8.8  $\mu$ L) and record the time.
7. At the end of each time interval remove 50  $\mu$ L and add to 100  $\mu$ L ISTD in conical vial, sonicate for 10 sec and spin down at 10,000 rpm for 5 minutes.
8. Take 100  $\mu$ L of supernatant and transfer to Spin-X HPLC filter tubes (Corning Incorporated, Cat # 8169) and centrifuge at 13,000 rpm for 5 minutes and take 5  $\mu$ L from this solution and dilute in 495  $\mu$ L of LCMS grade methanol (Fischer scientific, CAS # 67-56-1) in a 2mL glass auto sampler vial (Microsolv, Cat # 95025-WCV)
9. The samples are analyzed by LCMS-8040. (Shimadzu)

**Data:**

Day 1:

| Time (min) | Assay 1             |                     | Assay 2             |                     | Assay 3             |                     | % remaining |         |         |
|------------|---------------------|---------------------|---------------------|---------------------|---------------------|---------------------|-------------|---------|---------|
|            | DK-I-56-1 Peak area | Verapamil Peak area | DK-I-56-1 Peak area | Verapamil Peak area | DK-I-56-1 Peak area | Verapamil Peak area | Assay 1     | Assay 2 | Assay 3 |
| 0          | 398212              | 2354869             | 384127              | 2302725             | 368877              | 2255486             | 100.06      | 99.88   | 99.72   |
| 10         | 361492              | 2153664             | 350612              | 2137443             | 364427              | 2307335             | 99.31       | 98.22   | 96.30   |
| 20         | 353751              | 2156111             | 351711              | 2207523             | 349893              | 2196606             | 97.08       | 95.40   | 97.12   |
| 30         | 353643              | 2216473             | 345716              | 2211492             | 331654              | 2156417             | 94.41       | 93.60   | 93.78   |
| 40         | 354234              | 2233525             | 343748              | 2144927             | 339505              | 2163298             | 93.84       | 95.96   | 95.69   |
| 50         | 336838              | 2133427             | 333079              | 2140599             | 328962              | 2168061             | 93.42       | 93.17   | 92.51   |
| 60         | 327874              | 2121028             | 353537              | 2272689             | 327292              | 2208601             | 91.46       | 93.14   | 90.36   |

Table 1: Peak areas and % remaining values

Day 2:

| Time (min) | Assay 1             |                     | Assay 2             |                     | Assay 3             |                     | (% remaining) |         |         |
|------------|---------------------|---------------------|---------------------|---------------------|---------------------|---------------------|---------------|---------|---------|
|            | DK-I-56-1 Peak area | Verapamil Peak area | DK-I-56-1 Peak area | Verapamil Peak area | DK-I-56-1 Peak area | Verapamil Peak area | Assay 1       | Assay 2 | Assay 3 |
| 0          | 387196              | 2270706             | 377106              | 2186412             | 386760              | 2248705             | 99.71         | 100.27  | 99.99   |
| 10         | 362459              | 2137087             | 356334              | 2114930             | 366413              | 2165630             | 99.18         | 97.95   | 98.36   |
| 20         | 364780              | 2211877             | 350046              | 2137002             | 370479              | 2212311             | 96.44         | 95.23   | 97.36   |
| 30         | 363646              | 2245148             | 349102              | 2151510             | 357194              | 2208806             | 94.71         | 94.33   | 94.02   |
| 40         | 340384              | 2162279             | 352923              | 2200550             | 350775              | 2182739             | 92.05         | 93.24   | 93.43   |
| 50         | 344590              | 2126528             | 347741              | 2190384             | 353240              | 2162260             | 94.76         | 92.30   | 94.98   |
| 60         | 349875              | 2221871             | 353066              | 2202566             | 336952              | 2140953             | 92.08         | 93.19   | 91.50   |

Table 2: Peak areas and % remaining values

**Calculation:**

From the peak area, Calculate the following

$$\text{Peak area ratio} = \frac{\text{Peak area of test compound (DK-I-56-1)}}{\text{Peak area of internal standard (ISTD)}}$$

$$\% \text{ remaining at time T} = \frac{\text{Peak area ratio at particular time T}}{\text{Peak area ratio at zero time point}} * 100$$

(T = 0, 10, 20,30,40,50 and 60)

## DATA ANALYSIS:

### Day 1

Linear regression analysis:

Slope:  $-0.001342 \pm 0.0001303$

At X= 60, Y =  $4.518 \pm 0.004697$

$R^2 = 0.8481$

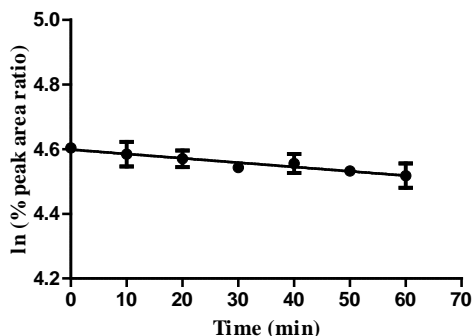

### Day 2

Linear regression analysis:

Slope:  $-0.001326 \pm 0.0001349$

At X = 60, Y =  $4.519 \pm 0.004865$

$R^2 = 0.8357$

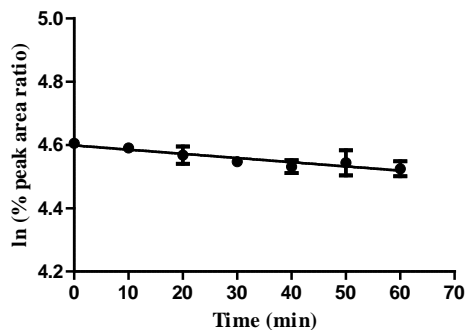

Metabolic Parameters:

Half-life:  $516.39 \pm 50.1$  min

$V_d$ : 100  $\mu\text{L}/\text{mg}$

Intrinsic clearance: 0.1342  $\mu\text{L}/\text{min}/\text{mg}$

Metabolic Rate: 2.684 nmol/min/mg

% remaining at 60 min:  $91.65 \pm 0.14$  %

Metabolic Parameters:

Half-life:  $522.62 \pm 53.16$  min

$V_d$ : 100  $\mu\text{L}/\text{mg}$

Intrinsic clearance: 0.1326  $\mu\text{L}/\text{min}/\text{mg}$

Metabolic Rate: 2.652 nmol/min/mg

% remaining at 60 min:  $91.74 \pm 0.10$  %

Note: The peak area ratios and natural log values are calculated using Microsoft excel 2010 and linear regression analysis is calculated using GraphPad prism.



# Mouse Liver Microsomal Assay

Principal Investigator: Dr. Alexander Arnold

Operator: Revathi Kodali

Test Compound: **8b**

Concentration: 10  $\mu$ M

Date: 05-04-2016

Facility: Milwaukee Institute for Drug Discovery

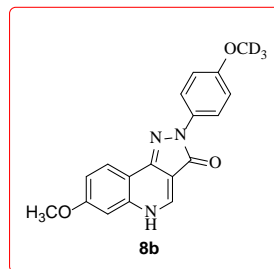

## Assay Protocol

Each evaluation included six independent assays carried out three at a time, on two different days

1. Preparation of solutions:
  - a. 1 mM test compound in DMSO.
  - b. 2  $\mu$ M 4,5 Diphenyl Imidazole ice cold Acetonitrile (ISTD).
2. For a total volume of Microsomal Assay Mixture (MAM) 390  $\mu$ L, sufficient for seven time points, combine the following
  - a. 282  $\mu$ L of 18.2 m $\Omega$  of water.
  - b. 80  $\mu$ L of 0.5 M potassium phosphate buffer (p<sup>H</sup> 7.4)
  - c. 20  $\mu$ L of NADPH A. (Corning life sciences, Cat # 451220)
  - d. 4  $\mu$ L of NADPH B. (Corning life sciences, Cat # 451200)
  - e. 4  $\mu$ L of test compound.
3. Sonicate MAM for 5 min and meanwhile thaw microsomes (20 mg/mL) (Life technologies, Cat # MSMC-PL) on ice.
4. Aliquot 100  $\mu$ L of ice cold ISTD into seven separate 1.5 mL conical vials and label them the time points for 0, 10, 20, 30, 40, 50, and 60 min.
5. Arrange the timer. Microsomes (Final concentration of 0.5 mg/mL) should be added to all time points except the zero time point.
6. Add 50  $\mu$ L of the MAM solution to the conical vial labelled as zero time point. Place the remaining MAM solution in the incubator (37  $^{\circ}$ C) for 5 min and initiate the reaction with addition of microsomes (8.8  $\mu$ L) and record the time.
7. At the end of each time interval remove 50  $\mu$ L and add to 100  $\mu$ L ISTD in conical vial, sonicate for 10 sec and spin down at 10,000 rpm for 5 minutes.
8. Take 100  $\mu$ L of supernatant and transfer to Spin-X HPLC filter tubes (Corning Incorporated, Cat # 8169) and centrifuge at 13,000 rpm for 5 minutes and take 5  $\mu$ L from this solution and dilute in 495  $\mu$ L of LCMS grade methanol (Fischer scientific, CAS # 67-56-1) in a 2mL glass auto sampler vial (Microsolv, Cat # 95025-WCV)
9. The samples are analyzed by LCMS-8040. (Shimadzu)

**Data:**

Day 1:

| Time (min) | Assay 1             |                     | Assay 2             |                     | Assay 3             |                     | % remaining |         |         |
|------------|---------------------|---------------------|---------------------|---------------------|---------------------|---------------------|-------------|---------|---------|
|            | DK-I-56-1 Peak area | Verapamil Peak area | DK-I-56-1 Peak area | Verapamil Peak area | DK-I-56-1 Peak area | Verapamil Peak area | Assay 1     | Assay 2 | Assay 3 |
| 0          | 388928              | 2307698             | 391664              | 2332218             | 402950              | 2417074             | 99.72       | 99.96   | 99.82   |
| 10         | 379319              | 2277526             | 364953              | 2238315             | 377640              | 2272011             | 98.55       | 97.05   | 99.52   |
| 20         | 371987              | 2305299             | 350938              | 2182276             | 355730              | 2231217             | 95.48       | 95.72   | 95.46   |
| 30         | 360570              | 2221865             | 344748              | 2175396             | 367885              | 2328394             | 96.02       | 94.33   | 94.61   |
| 40         | 355823              | 2247913             | 351540              | 2227323             | 352866              | 2210036             | 93.66       | 93.94   | 95.60   |
| 50         | 342826              | 2151478             | 363128              | 2309151             | 328306              | 2119895             | 94.28       | 93.60   | 92.73   |
| 60         | 351429              | 2183246             | 346906              | 2233889             | 348682              | 2236280             | 95.24       | 92.43   | 93.36   |

Table 1: Peak areas and % remaining values

Day 2:

| Time (min) | Assay 1             |                     | Assay 2             |                     | Assay 3             |                     | (% remaining) |         |         |
|------------|---------------------|---------------------|---------------------|---------------------|---------------------|---------------------|---------------|---------|---------|
|            | DK-I-56-1 Peak area | Verapamil Peak area | DK-I-56-1 Peak area | Verapamil Peak area | DK-I-56-1 Peak area | Verapamil Peak area | Assay 1       | Assay 2 | Assay 3 |
| 0          | 401832              | 2332034             | 399175              | 2395303             | 404444              | 2394973             | 100.18        | 99.79   | 99.92   |
| 10         | 398950              | 2326501             | 371579              | 2259018             | 381853              | 2286061             | 99.69         | 98.49   | 98.83   |
| 20         | 371128              | 2261581             | 372242              | 2319773             | 354429              | 2160499             | 95.40         | 96.08   | 97.07   |
| 30         | 365461              | 2192182             | 356359              | 2264013             | 354905              | 2197136             | 96.92         | 94.25   | 95.58   |
| 40         | 367394              | 2228779             | 341564              | 2141303             | 348008              | 2204773             | 95.83         | 95.51   | 93.39   |
| 50         | 355291              | 2187107             | 349208              | 2216275             | 354062              | 2198066             | 94.44         | 94.35   | 95.31   |
| 60         | 355799              | 2211839             | 350652              | 2298823             | 349085              | 2187612             | 93.52         | 91.33   | 94.42   |

Table 2: Peak areas and % remaining values

**Calculation:**

From the peak area, Calculate the following

$$\text{Peak area ratio} = \frac{\text{Peak area of test compound (DK-I-56-1)}}{\text{Peak area of internal standard (ISTD)}}$$

$$\% \text{ remaining at time T} = \frac{\text{Peak area ratio at particular time T}}{\text{Peak area ratio at zero time point}} * 100$$

(T = 0, 10, 20,30,40,50 and 60)

## DATA ANALYSIS:

### Day 1

Linear regression analysis:

Slope:  $-0.001081 \pm 0.0001303$

At X= 60, Y =  $4.529 \pm 0.004696$

$R^2 = 0.7838$

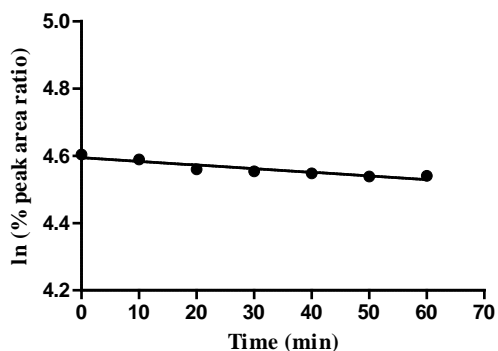

Metabolic Parameters:

Half-life:  $641.07 \pm 77$  min

$V_d$ : 100  $\mu\text{L}/\text{mg}$

Intrinsic clearance: 0.1081  $\mu\text{L}/\text{min}/\text{mg}$

Metabolic Rate: 2.162 nmol/min/mg

% remaining at 60 min:  $92.66 \pm 0.10$  %

Note: The peak area ratios and natural log values are calculated using Microsoft excel 2010 and linear regression analysis is calculated using GraphPad prism.

### Day 2

Linear regression analysis:

Slope:  $-0.001124 \pm 0.0001253$

At X = 60, Y =  $4.532 \pm 0.004518$

$R^2 = 0.8089$

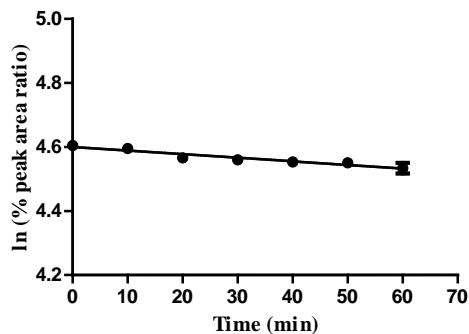

Metabolic Parameters:

Half-life:  $616.54 \pm 69$  min

$V_d$ : 100  $\mu\text{L}/\text{mg}$

Intrinsic clearance: 0.1124  $\mu\text{L}/\text{min}/\text{mg}$

Metabolic Rate: 2.248 nmol/min/mg

% remaining at 60 min:  $92.94 \pm 0.09$  %

## Human Liver Microsomal Assay

Principal Investigator: Dr. Alexander Arnold

Operator: Revathi Kodali

Test Compound: **8c**

Concentration: 10  $\mu$ M

Date: 06-17-2017

Facility: Milwaukee Institute for Drug Discovery

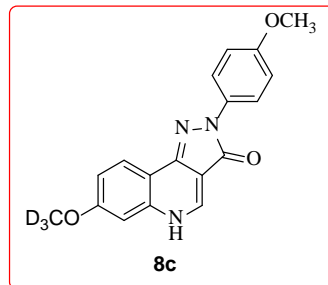

### Assay Protocol

Each evaluation included six independent assays carried out three at a time, on two different days

1. Preparation of solutions:
  - a. 1 mM test compound in DMSO.
  - b. 2  $\mu$ M 4,5 Diphenyl Imidazole in Acetonitrile as internal standard (ISTD) (store on ice).
2. For a total volume of Microsomal Assay Mixture (MAM) 390  $\mu$ L, sufficient for seven time points, combine the following
  - a. 282  $\mu$ L of 18.2 m $\Omega$  of water.
  - b. 80  $\mu$ L of 0.5 M potassium phosphate buffer (p<sup>H</sup> 7.4)
  - c. 20  $\mu$ L of NADPH A. (Corning life sciences, Cat # 451220)
  - d. 4  $\mu$ L of NADPH B. (Corning life sciences, Cat # 451200)
  - e. 4  $\mu$ L of test compound.
3. Sonicate MAM for 5 min and meanwhile thaw microsomes (20 mg/mL) (BD Gentest, Cat # 452156) on ice.
4. Aliquot 100  $\mu$ L of ice cold ISTD into seven separate 1.5 mL conical vials and label them the time points for 0, 10, 20, 30, 40, 50, and 60 min.
5. Arrange the timer. Microsomes (Final concentration of 0.5 mg/mL) should be added to all time points except the zero time point.
6. Add 50  $\mu$ L of the MAM solution to the conical vial labelled as zero time point. Place the remaining MAM solution in the incubator (37 °C) for 5 min and initiate the reaction with addition of microsomes (8.8  $\mu$ L) and record the time.
7. At the end of each time interval remove 50  $\mu$ L and add to 100  $\mu$ L ISTD in conical vial, sonicate for 10 sec and spin down at 10,000 rpm for 5 minutes.
8. Take 100  $\mu$ L of supernatant and transfer to Spin-X HPLC filter tubes (Corning Incorporated, Cat # 8169) and centrifuge at 13,000 rpm for 5 minutes and take 5  $\mu$ L from this solution and dilute in 495  $\mu$ L of LCMS grade methanol (Fischer scientific, CAS # 67-56-1) in a 2mL glass auto sampler vial (Microsolv, Cat # 95025-WCV)
9. The samples are analyzed by LCMS-8040. (Shimadzu)

**Data:**

Day 1:

| Time (min) | Assay 1             |                | Assay 2             |                | Assay 3             |                | % remaining |         |         |
|------------|---------------------|----------------|---------------------|----------------|---------------------|----------------|-------------|---------|---------|
|            | DK-II-3-1 Peak area | ISTD Peak area | DK-II-3-1 Peak area | ISTD Peak area | DK-II-3-1 Peak area | ISTD Peak area | Assay 1     | Assay 2 | Assay 3 |
| 0          | 236193              | 23908          | 240718              | 23550          | 242866              | 23587          | 100.00      | 99.99   | 99.99   |
| 10         | 232747              | 23689          | 228301              | 22980          | 236745              | 24005          | 99.45       | 97.19   | 95.77   |
| 20         | 220288              | 23974          | 235154              | 24176          | 220725              | 23502          | 93.01       | 95.15   | 91.20   |
| 30         | 229623              | 23893          | 230097              | 23822          | 231957              | 23406          | 97.28       | 94.49   | 96.24   |
| 40         | 226681              | 23894          | 228169              | 23790          | 232302              | 23693          | 96.03       | 93.82   | 95.21   |
| 50         | 226106              | 24008          | 224076              | 23499          | 222828              | 22836          | 95.33       | 93.28   | 94.76   |
| 60         | 209034              | 22893          | 224075              | 23243          | 222144              | 23009          | 92.42       | 94.31   | 93.76   |

Table 1: Peak areas and % remaining values

Day 2:

| Time (min) | Assay 1             |                | Assay 2             |                | Assay 3             |                | (% remaining) |         |         |
|------------|---------------------|----------------|---------------------|----------------|---------------------|----------------|---------------|---------|---------|
|            | DK-II-3-1 Peak area | ISTD Peak area | DK-II-3-1 Peak area | ISTD Peak area | DK-II-3-1 Peak area | ISTD Peak area | Assay 1       | Assay 2 | Assay 3 |
| 0          | 240293              | 23322          | 245499              | 23714          | 238099              | 23446          | 100.00        | 100.00  | 100.00  |
| 10         | 237690              | 23842          | 236607              | 23170          | 240575              | 24206          | 96.76         | 98.64   | 97.87   |
| 20         | 231496              | 23497          | 224523              | 23336          | 233912              | 23968          | 95.62         | 92.94   | 96.10   |
| 30         | 224366              | 22966          | 240144              | 24028          | 228386              | 23461          | 94.82         | 96.54   | 95.86   |
| 40         | 227905              | 24075          | 229073              | 23639          | 210756              | 22679          | 91.88         | 93.61   | 91.51   |
| 50         | 228544              | 23641          | 230508              | 23626          | 221648              | 23188          | 93.83         | 94.24   | 94.12   |
| 60         | 218997              | 23816          | 228654              | 24088          | 219423              | 22930          | 89.24         | 91.69   | 94.23   |

Table 2: Peak areas and % remaining values

**Calculation:**

From the peak area, Calculate the following

$$\text{Peak area ratio} = \frac{\text{Peak area of test compound (DK-II-3-1)}}{\text{Peak area of internal standard (ISTD)}}$$

$$\% \text{ remaining at time T} = \frac{\text{Peak area ratio at particular time T}}{\text{Peak area ratio at zero time point}} * 100$$

(T = 0, 10, 20,30,40,50 and 60)

## DATA ANALYSIS:

### Day 1

Linear regression analysis:

Slope:  $-0.0008726 \pm 0.0002206$

At X= 60, Y =  $4.534 \pm 0.007955$

$R^2 = 0.4515$

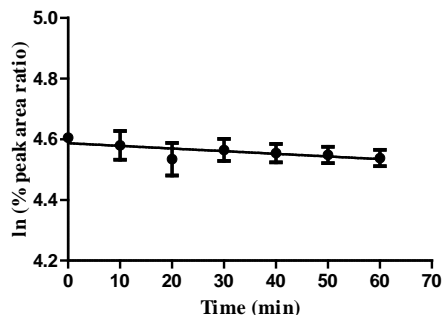

### Day 2

Linear regression analysis:

Slope:  $-0.001302 \pm 0.0001877$

At X = 60, Y =  $4.517 \pm 0.006767$

$R^2 = 0.7171$

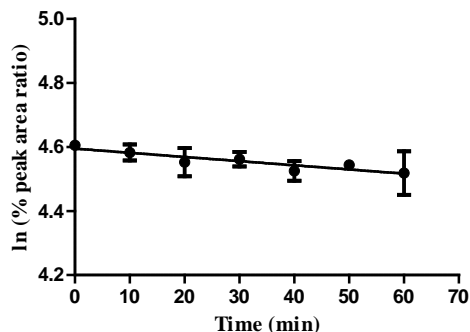

Metabolic Parameters:

Half-life:  $794 \pm 200$  min

$V_d$ :  $100 \mu\text{L}/\text{mg}$

Intrinsic clearance:  $0.08726 \mu\text{L}/\text{min}/\text{mg}$

Metabolic Rate:  $1.7452 \text{ nmol}/\text{min}/\text{mg}$

% remaining at 60 min:  $93 \pm 0.16$  %

Metabolic Parameters:

Half-life:  $532 \pm 76$  min

$V_d$ :  $100 \mu\text{L}/\text{mg}$

Intrinsic clearance:  $0.1302 \mu\text{L}/\text{min}/\text{mg}$

Metabolic Rate:  $2.604 \text{ nmol}/\text{min}/\text{mg}$

% remaining at 60 min:  $91 \pm 0.13$  %

Note: The peak area ratios and natural log values are calculated using Microsoft excel 2010 and linear regression analysis is calculated using GraphPad prism.

# Mouse Liver Microsomal Assay

Principal Investigator: Dr. Alexander Arnold

Operator: Revathi Kodali

Test Compound: **8c**

Concentration: 10  $\mu$ M

Date: 04-08-2016

Facility: Milwaukee Institute for Drug Discovery

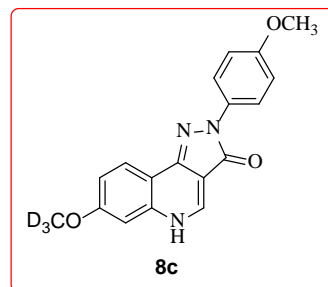

## Assay Protocol

Each evaluation included six independent assays carried out three at a time, on two different days

1. Preparation of solutions:
  - a. 1 mM test compound in DMSO.
  - b. 2  $\mu$ M Verapamil in Acetonitrile (ACN) as internal standard (store on ice).
2. For a total volume of Microsomal Assay Mixture (MAM) 390  $\mu$ L, sufficient for seven time points, combine the following
  - a. 282  $\mu$ L of 18.2 m $\Omega$  of water.
  - b. 80  $\mu$ L of 0.5 M potassium phosphate buffer (p<sup>H</sup> 7.4)
  - c. 20  $\mu$ L of NADPH A. (Corning life sciences, Cat # 451220)
  - d. 4  $\mu$ L of NADPH B. (Corning life sciences, Cat # 451200)
  - e. 4  $\mu$ L of test compound.
3. Sonicate MAM for 5 min and meanwhile thaw microsomes (20 mg/mL) (Life technologies, Cat # MSMC-PL) on ice.
4. Aliquot 100  $\mu$ L of ice cold ISTD into seven separate 1.5 mL conical vials and label them the time points for 0, 10, 20, 30, 40, 50, and 60 min.
5. Arrange the timer. Microsomes (Final concentration of 0.5 mg/mL) should be added to all time points except the zero time point.
6. Add 50  $\mu$ L of the MAM solution to the conical vial labelled as zero time point. Place the remaining MAM solution in the incubator (37  $^{\circ}$ C) for 5 min and initiate the reaction with addition of microsomes (8.8  $\mu$ L) and record the time.
7. At the end of each time interval remove 50  $\mu$ L and add to 100  $\mu$ L ISTD in conical vial, sonicate for 10 sec and spin down at 10,000 rpm for 5 minutes.
8. Take 100  $\mu$ L of supernatant and transfer to Spin-X HPLC filter tubes (Corning Incorporated, Cat # 8169) and centrifuge at 13,000 rpm for 5 minutes and take 5  $\mu$ L from this solution and dilute in 495  $\mu$ L of LCMS grade methanol (Fischer scientific, CAS # 67-56-1) in a 2mL glass auto sampler vial (Microsolv, Cat # 95025-WCV)
9. The samples are analyzed by LCMS-8040. (Shimadzu)

**Data:**

Day 1:

| Time (min) | Assay 1             |                     | Assay 2             |                     | Assay 3             |                     | % remaining |         |         |
|------------|---------------------|---------------------|---------------------|---------------------|---------------------|---------------------|-------------|---------|---------|
|            | DK-II-3-1 Peak area | Verapamil Peak area | DK-II-3-1 Peak area | Verapamil Peak area | DK-II-3-1 Peak area | Verapamil Peak area | Assay 1     | Assay 2 | Assay 3 |
| 0          | 111144              | 278595              | 98899               | 285987              | 104065              | 286966              | 99.98       | 99.94   | 99.90   |
| 10         | 107949              | 280252              | 95360               | 278895              | 99077               | 282663              | 96.53       | 98.82   | 96.56   |
| 20         | 106291              | 287540              | 92029               | 276919              | 96414               | 278874              | 92.64       | 96.05   | 95.24   |
| 30         | 104270              | 279360              | 91729               | 287346              | 97728               | 287461              | 93.54       | 92.26   | 93.65   |
| 40         | 101471              | 270388              | 93541               | 288645              | 96863               | 279779              | 94.05       | 93.66   | 95.37   |
| 50         | 105186              | 285058              | 92155               | 279402              | 94564               | 282182              | 92.48       | 95.32   | 92.31   |
| 60         | 106026              | 279377              | 95346               | 285213              | 97167               | 279799              | 95.11       | 96.61   | 95.66   |

Table 1: Peak areas and % remaining values

Day 2:

| Time (min) | Assay 1             |                     | Assay 2             |                     | Assay 3             |                     | (% remaining) |         |         |
|------------|---------------------|---------------------|---------------------|---------------------|---------------------|---------------------|---------------|---------|---------|
|            | DK-II-3-1 Peak area | Verapamil Peak area | DK-II-3-1 Peak area | Verapamil Peak area | DK-II-3-1 Peak area | Verapamil Peak area | Assay 1       | Assay 2 | Assay 3 |
| 0          | 92576               | 281935              | 98496               | 277116              | 100164              | 285161              | 100.11        | 100.12  | 100.07  |
| 10         | 92661               | 292879              | 95851               | 279035              | 96979               | 287881              | 96.45         | 96.76   | 95.97   |
| 20         | 89484               | 287644              | 97725               | 295691              | 83913               | 248471              | 94.84         | 93.09   | 96.21   |
| 30         | 91955               | 299743              | 96183               | 282336              | 95556               | 290799              | 93.53         | 95.96   | 93.61   |
| 40         | 90362               | 289887              | 94361               | 279974              | 97195               | 299641              | 95.03         | 94.93   | 92.41   |
| 50         | 87875               | 277434              | 92404               | 278043              | 93112               | 274697              | 96.56         | 93.61   | 96.57   |
| 60         | 88889               | 287296              | 92451               | 285458              | 92002               | 279777              | 94.32         | 91.23   | 93.68   |

Table 2: Peak areas and % remaining values

**Calculation:**

From the peak area, Calculate the following

$$\text{Peak area ratio} = \frac{\text{Peak area of test compound (DK-II-3-1)}}{\text{Peak area of internal standard (Verapamil)}}$$

$$\% \text{ remaining at time T} = \frac{\text{Peak area ratio at particular time T}}{\text{Peak area ratio at zero time point}} * 100$$

(T = 0, 10, 20,30,40,50 and 60)



## DATA ANALYSIS:

### Day 1

Linear regression analysis:

Slope:  $-0.0007583 \pm 0.0002330$

At X= 60, Y =  $4.536 \pm 0.008400$

$R^2 = 0.3580$

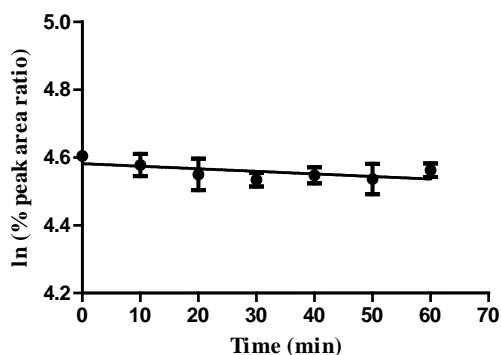

Metabolic Parameters:

Half-life:  $913.88 \pm 280.85$  min

$V_d$ :  $100 \mu\text{L}/\text{mg}$

Intrinsic clearance:  $0.07583 \mu\text{L}/\text{min}/\text{mg}$

Metabolic Rate:  $1.5166 \text{ nmol}/\text{min}/\text{mg}$

% remaining at 60 min:  $93.31 \pm 0.17$  %

### Day 2

Linear regression analysis:

Slope:  $-0.0008643 \pm 0.0002043$

At X = 60, Y =  $4.533 \pm 0.007365$

$R^2 = 0.4852$

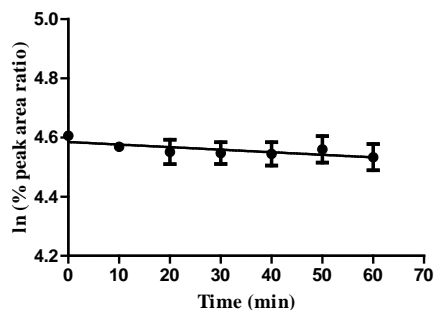

Metabolic Parameters:

Half-life:  $801.80 \pm 189.52$  min

$V_d$ :  $100 \mu\text{L}/\text{mg}$

Intrinsic clearance:  $0.08643 \mu\text{L}/\text{min}/\text{mg}$

Metabolic Rate:  $1.7286 \text{ nmol}/\text{min}/\text{mg}$

% remaining at 60 min:  $93.03 \pm 0.15$  %

Note: The peak area ratios and natural log values are calculated using Microsoft excel 2010 and linear regression analysis is calculated using GraphPad prism.

# Human Liver Microsomal Assay

Principal Investigator: Dr. Alexander Arnold

Operator: Revathi Kodali

Test Compound: **8d**

Concentration: 10  $\mu$ M

Date: 02-22-2016

Facility: Milwaukee Institute for Drug Discovery

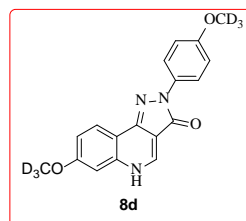

## Assay Protocol

Each evaluation included six independent assays carried out three at a time, on two different days

1. Preparation of solutions:
  - a. 1 mM test compound in DMSO.
  - b. 2  $\mu$ M Verapamil in Acetonitrile (ACN) as internal standard (store on ice).
2. For a total volume of Microsomal Assay Mixture (MAM) 390  $\mu$ L, sufficient for seven time points, combine the following
  - a. 282  $\mu$ L of 18.2 m $\Omega$  of water.
  - b. 80  $\mu$ L of 0.5 M potassium phosphate buffer (p<sup>H</sup> 7.4)
  - c. 20  $\mu$ L of NADPH A. (Corning life sciences, Cat # 451220)
  - d. 4  $\mu$ L of NADPH B. (Corning life sciences, Cat # 451200)
  - e. 4  $\mu$ L of test compound.
3. Sonicate MAM for 5 min and meanwhile thaw microsomes (20 mg/mL) (BD Gentest, Cat # 452156) on ice.
4. Aliquot 100  $\mu$ L of ice cold ISTD into seven separate 1.5 mL conical vials and label them the time points for 0, 10, 20, 30, 40, 50, and 60 min.
5. Arrange the timer. Microsomes (Final concentration of 0.5 mg/mL) should be added to all time points except the zero time point.
6. Add 50  $\mu$ L of the MAM solution to the conical vial labelled as zero time point. Place the remaining MAM solution in the incubator (37  $^{\circ}$ C) for 5 min and initiate the reaction with addition of microsomes (8.8  $\mu$ L) and record the time.
7. At the end of each time interval remove 50  $\mu$ L and add to 100  $\mu$ L ISTD in conical vial, sonicate for 10 sec and spin down at 10,000 rpm for 5 minutes.
8. Take 100  $\mu$ L of supernatant and transfer to Spin-X HPLC filter tubes (Corning Incorporated, Cat # 8169) and centrifuge at 13,000 rpm for 5 minutes and take 5  $\mu$ L from this solution and dilute in 495  $\mu$ L of LCMS grade methanol (Fischer scientific, CAS # 67-56-1) in a 2mL glass auto sampler vial (Microsolv, Cat # 95025-WCV)
9. The samples are analyzed by LCMS-8040. (Shimadzu)

**Data:**

Day 1:

| Time (min) | Assay 1             |                     | Assay 2             |                     | Assay 3             |                     | % remaining |         |         |
|------------|---------------------|---------------------|---------------------|---------------------|---------------------|---------------------|-------------|---------|---------|
|            | DK-I-60-3 Peak area | Verapamil Peak area | DK-I-60-3 Peak area | Verapamil Peak area | DK-I-60-3 Peak area | Verapamil Peak area | Assay 1     | Assay 2 | Assay 3 |
| 0          | 119623              | 751693              | 123300              | 762556              | 120046              | 764558              | 100.08      | 99.19   | 100.00  |
| 10         | 114114              | 768963              | 114322              | 764031              | 110461              | 740708              | 93.33       | 91.79   | 94.98   |
| 20         | 110327              | 769408              | 115777              | 753029              | 106689              | 743037              | 90.18       | 94.32   | 91.45   |
| 30         | 112935              | 756232              | 115004              | 757564              | 112745              | 750648              | 93.92       | 93.13   | 95.66   |
| 40         | 110428              | 744917              | 111041              | 740898              | 108647              | 736750              | 93.23       | 91.94   | 93.92   |
| 50         | 109616              | 758076              | 116028              | 753982              | 106766              | 745883              | 90.94       | 94.40   | 91.17   |
| 60         | 106932              | 741303              | 115257              | 745460              | 111099              | 754822              | 90.72       | 94.85   | 93.74   |

Table 1: Peak areas and % remaining values

Day 2:

| Time (min) | Assay 1             |                     | Assay 2             |                     | Assay 3             |                     | (% remaining) |         |         |
|------------|---------------------|---------------------|---------------------|---------------------|---------------------|---------------------|---------------|---------|---------|
|            | DK-I-60-3 Peak area | Verapamil Peak area | DK-I-60-3 Peak area | Verapamil Peak area | DK-I-60-3 Peak area | Verapamil Peak area | Assay 1       | Assay 2 | Assay 3 |
| 0          | 124924              | 767904              | 102412              | 749745              | 117099              | 759194              | 99.80         | 99.70   | 100.15  |
| 10         | 115805              | 748997              | 100631              | 765396              | 109568              | 740171              | 94.85         | 95.96   | 96.12   |
| 20         | 108862              | 713542              | 99251               | 769134              | 105247              | 741358              | 93.59         | 94.19   | 92.18   |
| 30         | 110702              | 750240              | 98189               | 771121              | 104484              | 736667              | 90.52         | 92.94   | 92.10   |
| 40         | 114315              | 765884              | 98401               | 763993              | 103824              | 742724              | 91.57         | 94.01   | 90.77   |
| 50         | 104617              | 699417              | 98970               | 776043              | 108827              | 751806              | 91.76         | 93.08   | 93.99   |
| 60         | 109088              | 730464              | 100918              | 777766              | 109146              | 763644              | 91.62         | 94.71   | 92.81   |

Table 2: Peak areas and % remaining values

**Calculation:**

From the peak area, Calculate the following

$$\text{Peak area ratio} = \frac{\text{Peak area of test compound (DK-I-60-3)}}{\text{Peak area of internal standard (Verapamil)}}$$

$$\% \text{ remaining at time T} = \frac{\text{Peak area ratio at particular time T}}{\text{Peak area ratio at zero time point}} * 100$$

(T = 0, 10, 20,30,40,50 and 60)

## DATA ANALYSIS:

### Day 1

Linear regression analysis:

Slope:  $-0.0007917 \pm 0.0002839$

At X= 60, Y =  $4.519 \pm 0.01023$

$R^2 = 0.2905$

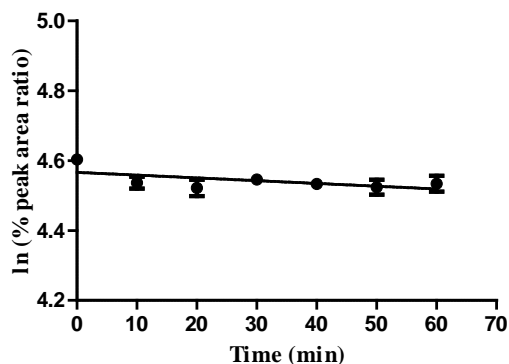

Metabolic Parameters:

Half-life:  $875.33 \pm 313$  min

$V_d$ :  $100 \mu\text{L}/\text{mg}$

Intrinsic clearance:  $0.07917 \mu\text{L}/\text{min}/\text{mg}$

Metabolic Rate:  $1.5834 \text{ nmol}/\text{min}/\text{mg}$

% remaining at 60 min:  $91.74 \pm 0.20$  %

Note: The peak area ratios and natural log values are calculated using Microsoft excel 2010 and linear regression analysis is calculated using GraphPad prism.

### Day 2

Linear regression analysis:

Slope:  $-0.001010 \pm 0.0002414$

At X= 60, Y =  $4.514 \pm 0.008704$

$R^2 = 0.4793$

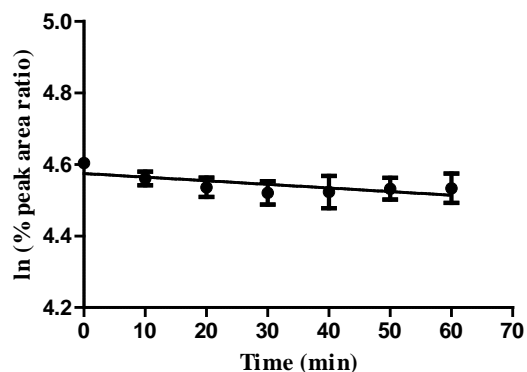

Metabolic Parameters:

Half-life:  $686.13 \pm 164$  min

$V_d$ :  $100 \mu\text{L}/\text{mg}$

Intrinsic clearance:  $0.101 \mu\text{L}/\text{min}/\text{mg}$

Metabolic Rate:  $2.02 \text{ nmol}/\text{min}/\text{mg}$

% remaining at 60 min:  $91.28 \pm 0.17$  %

# Mouse Liver Microsomal Assay

Principal Investigator: Dr. Alexander Arnold

Operator: Revathi Kodali

Test Compound: **8d**

Concentration: 10  $\mu$ M

Date: 02-22-2016

Facility: Milwaukee Institute for Drug Discovery

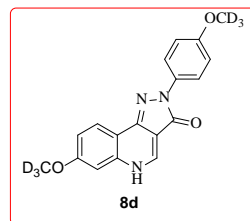

## Assay Protocol

Each evaluation included six independent assays carried out three at a time, on two different days

1. Preparation of solutions:
  - a. 1 mM test compound in DMSO.
  - b. 2  $\mu$ M Verapamil in Acetonitrile (ACN) as internal standard (store on ice).
2. For a total volume of Microsomal Assay Mixture (MAM) 390  $\mu$ L, sufficient for seven time points, combine the following
  - a. 282  $\mu$ L of 18.2 m $\Omega$  of water.
  - b. 80  $\mu$ L of 0.5 M potassium phosphate buffer (pH 7.4)
  - c. 20  $\mu$ L of NADPH A. (Corning life sciences, Cat # 451220)
  - d. 4  $\mu$ L of NADPH B. (Corning life sciences, Cat # 451200)
  - e. 4  $\mu$ L of test compound.
3. Sonicate MAM for 5 min and meanwhile thaw microsomes (20 mg/mL) (Life technologies, Cat # MSMC-PL) on ice.
4. Aliquot 100  $\mu$ L of ice cold ISTD into seven separate 1.5 mL conical vials and label them the time points for 0, 10, 20, 30, 40, 50, and 60 min.
5. Arrange the timer. Microsomes (Final concentration of 0.5 mg/mL) should be added to all time points except the zero time point.
6. Add 50  $\mu$ L of the MAM solution to the conical vial labelled as zero time point. Place the remaining MAM solution in the incubator (37 °C) for 5 min and initiate the reaction with addition of microsomes (8.8  $\mu$ L) and record the time.
7. At the end of each time interval remove 50  $\mu$ L and add to 100  $\mu$ L ISTD in conical vial, sonicate for 10 sec and spin down at 10,000 rpm for 5 minutes.
8. Take 100  $\mu$ L of supernatant and transfer to Spin-X HPLC filter tubes (Corning Incorporated, Cat # 8169) and centrifuge at 13,000 rpm for 5 minutes and take 5  $\mu$ L from this solution and dilute in 495  $\mu$ L of LCMS grade methanol (Fischer scientific, CAS # 67-56-1) in a 2mL glass auto sampler vial (Microsolv, Cat # 95025-WCV)
9. The samples are analyzed by LCMS-8040. (Shimadzu)

**Data:**

Day 1:

| Time (min) | Assay 1             |                     | Assay 2             |                     | Assay 3             |                     | % remaining |         |         |
|------------|---------------------|---------------------|---------------------|---------------------|---------------------|---------------------|-------------|---------|---------|
|            | DK-I-60-3 Peak area | Verapamil Peak area | DK-I-60-3 Peak area | Verapamil Peak area | DK-I-60-3 Peak area | Verapamil Peak area | Assay 1     | Assay 2 | Assay 3 |
| 0          | 106722              | 720638              | 112675              | 716355              | 108597              | 724437              | 100.06      | 100.18  | 99.93   |
| 10         | 104394              | 710505              | 111379              | 745295              | 109849              | 747161              | 99.27       | 95.18   | 98.01   |
| 20         | 98781               | 705588              | 108591              | 749281              | 107471              | 741115              | 94.59       | 92.31   | 96.67   |
| 30         | 103778              | 727932              | 109486              | 735798              | 99277               | 732657              | 96.32       | 94.77   | 90.33   |
| 40         | 102609              | 733376              | 105488              | 742147              | 109527              | 773078              | 94.53       | 90.53   | 94.45   |
| 50         | 101605              | 729328              | 112939              | 745040              | 106452              | 762456              | 94.13       | 96.55   | 93.07   |
| 60         | 102646              | 738921              | 107241              | 724588              | 109861              | 756321              | 93.86       | 94.26   | 96.83   |

Table 1: Peak areas and % remaining values

Day 2:

| Time (min) | Assay 1             |                     | Assay 2             |                     | Assay 3             |                     | (% remaining) |         |         |
|------------|---------------------|---------------------|---------------------|---------------------|---------------------|---------------------|---------------|---------|---------|
|            | DK-I-60-3 Peak area | Verapamil Peak area | DK-I-60-3 Peak area | Verapamil Peak area | DK-I-60-3 Peak area | Verapamil Peak area | Assay 1       | Assay 2 | Assay 3 |
| 0          | 104490              | 754231              | 102920              | 732920              | 108522              | 731478              | 99.66         | 100.30  | 100.24  |
| 10         | 100281              | 749451              | 105884              | 760165              | 110207              | 781689              | 96.26         | 99.49   | 95.261  |
| 20         | 95278               | 760108              | 102711              | 770740              | 103552              | 746542              | 90.17         | 95.18   | 93.72   |
| 30         | 100096              | 750328              | 100660              | 761342              | 103925              | 755479              | 95.97         | 94.43   | 92.94   |
| 40         | 94133               | 731526              | 97701               | 748691              | 105962              | 734495              | 92.57         | 93.21   | 97.47   |
| 50         | 101839              | 774789              | 103090              | 781126              | 104050              | 752296              | 94.56         | 94.26   | 93.45   |
| 60         | 99525               | 754772              | 98905               | 752921              | 103084              | 739907              | 94.86         | 93.83   | 94.13   |

Table 2: Peak areas and % remaining values

**Calculation:**

From the peak area, Calculate the following

$$\text{Peak area ratio} = \frac{\text{Peak area of test compound (DK-I-60-3)}}{\text{Peak area of internal standard (Verapamil)}}$$

$$\% \text{ remaining at time T} = \frac{\text{Peak area ratio at particular time T}}{\text{Peak area ratio at zero time point}} * 100$$

(T = 0, 10, 20,30,40,50 and 60)

## DATA ANALYSIS:

### Day 1

Linear regression analysis:

Slope:  $-0.0008286 \pm 0.0002774$

At X= 60, Y =  $4.534 \pm 0.01000$

$R^2 = 0.3195$

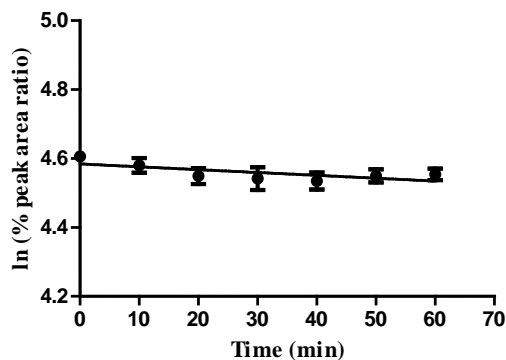

### Day 2

Linear regression analysis:

Slope:  $-0.0008083 \pm 0.0002580$

At X= 60, Y =  $4.533 \pm 0.009301$

$R^2 = 0.3407$

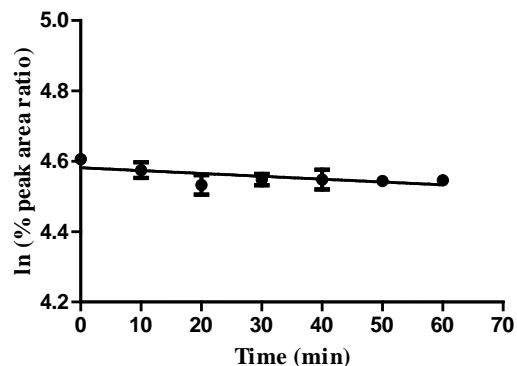

Metabolic Parameters:

Half-life:  $836.35 \pm 280$  min

$V_d$ :  $100 \mu\text{L}/\text{mg}$

Intrinsic clearance:  $0.08286 \mu\text{L}/\text{min}/\text{mg}$

Metabolic Rate:  $1.6572 \text{ nmol}/\text{min}/\text{mg}$

% remaining at 60 min:  $93.13 \pm 0.20$  %

Metabolic Parameters:

Half-life:  $857.35 \pm 273$  min

$V_d$ :  $100 \mu\text{L}/\text{mg}$

Intrinsic clearance:  $0.08083 \mu\text{L}/\text{min}/\text{mg}$

Metabolic Rate:  $1.6166 \text{ nmol}/\text{min}/\text{mg}$

% remaining at 60 min:  $93.03 \pm 0.19$  %

Note: The peak area ratios and natural log values are calculated using Microsoft excel 2010 and linear regression analysis is calculated using GraphPad prism.

# Human Liver Microsomal Assay

Principal Investigator: Dr. Alexander Arnold  
Operator: Revathi Kodali  
Test Compound: **8e**  
Concentration: 10  $\mu$ M  
Date: 09-06-2017  
Facility: Milwaukee Institute for Drug Discovery

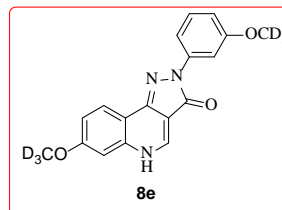

## Assay Protocol

Each evaluation included six independent assays carried out three at a time, on two different days

1. Preparation of solutions:
  - a. 1 mM test compound in DMSO.
  - b. 1  $\mu$ M 4,5 Di Phenyl Imidazole in ice cold Acetonitrile (ISTD).
2. For a total volume of Microsomal Assay Mixture (MAM) 390  $\mu$ L, sufficient for seven time points, combine the following
  - a. 282  $\mu$ L of 18.2 m $\Omega$  of water.
  - b. 80  $\mu$ L of 0.5 M potassium phosphate buffer (p<sup>H</sup> 7.4)
  - c. 20  $\mu$ L of NADPH A. (Corning life sciences, Cat # 451220)
  - d. 4  $\mu$ L of NADPH B. (Corning life sciences, Cat # 451200)
  - e. 4  $\mu$ L of test compound.
3. Sonicate MAM for 5 min and meanwhile thaw microsomes (20 mg/mL) (BD Biosciences, Cat # 452156) on ice.
4. Aliquot 100  $\mu$ L of ice cold ISTD into seven separate 1.5 mL conical vials and label them the time points for 0, 10, 20, 30, 40, 50, and 60 min.
5. Arrange the timer. Microsomes (Final concentration of 0.5 mg/mL) should be added to all time points except the zero time point.
6. Add 50  $\mu$ L of the MAM solution to the conical vial labelled as zero time point. Place the remaining MAM solution in the incubator (37  $^{\circ}$ C) for 5 min and initiate the reaction with addition of microsomes (8.8  $\mu$ L) and record the time.
7. At the end of each time interval remove 50  $\mu$ L and add to 100  $\mu$ L ISTD in conical vial, sonicate for 10 sec and spin down at 10,000 rpm for 5 minutes.
8. Take 100  $\mu$ L of supernatant and transfer to Spin-X HPLC filter tubes (Corning Incorporated, Cat # 8169) and centrifuge at 13,000 rpm for 5 minutes and take 5  $\mu$ L from this solution and dilute in 495  $\mu$ L of LCMS grade methanol (Fischer scientific, CAS # 67-56-1) in a 2mL glass auto sampler vial (Microsolv, Cat # 95025-WCV)
9. The samples are analyzed by LCMS-8040. (Shimadzu)



**Data:**

Day 1:

| Time (min) | Assay 1             |                | Assay 2             |                | Assay 3             |                | % remaining |         |         |
|------------|---------------------|----------------|---------------------|----------------|---------------------|----------------|-------------|---------|---------|
|            | DK-I-94-1 Peak area | ISTD Peak area | DK-I-94-1 Peak area | ISTD Peak area | DK-I-94-1 Peak area | ISTD Peak area | Assay 1     | Assay 2 | Assay 3 |
| 0          | 99306               | 99262          | 103648              | 98877          | 108203              | 95577          | 100.04      | 100.02  | 100.00  |
| 10         | 98286               | 99764          | 97179               | 99045          | 99005               | 90106          | 98.51       | 93.62   | 97.06   |
| 20         | 89132               | 92094          | 88632               | 88730          | 96921               | 89394          | 96.78       | 95.31   | 95.77   |
| 30         | 85234               | 90864          | 82687               | 83885          | 100259              | 92635          | 93.80       | 94.05   | 95.61   |
| 40         | 83864               | 93281          | 95998               | 100515         | 107622              | 105755         | 89.90       | 91.13   | 89.89   |
| 50         | 81572               | 89315          | 95124               | 97589          | 95099               | 90297          | 91.33       | 93.01   | 93.03   |
| 60         | 83372               | 93197          | 87647               | 90647          | 89690               | 92014          | 89.45       | 92.26   | 86.10   |

Table 1: Peak areas and % remaining values

Day 2:

| Time (min) | Assay 1             |                | Assay 2             |                | Assay 3             |                | (% remaining) |         |         |
|------------|---------------------|----------------|---------------------|----------------|---------------------|----------------|---------------|---------|---------|
|            | DK-I-94-1 Peak area | ISTD Peak area | DK-I-94-1 Peak area | ISTD Peak area | DK-I-94-1 Peak area | ISTD Peak area | Assay 1       | Assay 2 | Assay 3 |
| 0          | 106199              | 100912         | 107611              | 98271          | 105203              | 101265         | 100.03        | 100.00  | 99.98   |
| 10         | 97245               | 98407          | 106776              | 99495          | 99848               | 98640          | 93.93         | 98.00   | 97.42   |
| 20         | 97442               | 100104         | 94509               | 89958          | 97460               | 101350         | 92.52         | 95.94   | 92.55   |
| 30         | 79922               | 81324          | 90285               | 86895          | 95071               | 104982         | 93.41         | 94.88   | 87.16   |
| 40         | 95021               | 100662         | 101710              | 100862         | 89791               | 95078          | 89.73         | 92.09   | 90.89   |
| 50         | 98998               | 99580          | 88800               | 84984          | 98193               | 103362         | 94.50         | 95.42   | 91.43   |
| 60         | 98842               | 103127         | 100338              | 102233         | 89001               | 92949          | 91.10         | 89.63   | 92.15   |

Table 2: Peak areas and % remaining values

**Calculation:**

From the peak area, Calculate the following

$$\text{Peak area ratio} = \frac{\text{Peak area of test compound (DK-I-94-1)}}{\text{Peak area of internal standard (ISTD)}}$$

$$\% \text{ remaining at time T} = \frac{\text{Peak area ratio at particular time T}}{\text{Peak area ratio at zero time point}} * 100$$

(T = 0, 10, 20,30,40,50 and 60)

## DATA ANALYSIS:

### Day 1

Linear regression analysis:

Slope:  $-0.001729 \pm 0.0002190$

At X= 60, Y =  $4.492 \pm 0.007895$

$R^2 = 0.7664$

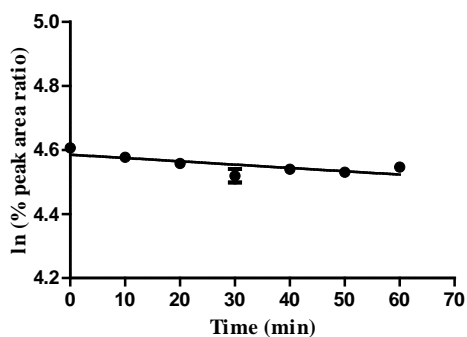

Metabolic Parameters:

Half-life:  $400 \pm 50$  min

$V_d$ :  $2000 \mu\text{L}/\text{mg}$

Intrinsic clearance:  $0.1729 \mu\text{L}/\text{min}/\text{mg}$

Metabolic Rate:  $3.458 \text{ nmol}/\text{min}/\text{mg}$

% remaining at 60 min:  $89 \pm 0.15$  %

Note: The peak area ratios and natural log values are calculated using Microsoft excel 2010 and linear regression analysis is calculated using GraphPad prism.

### Day 2

Linear regression analysis:

Slope:  $-0.001321 \pm 0.0003047$

At X= 60, Y =  $4.503 \pm 0.01098$

$R^2 = 0.4975$

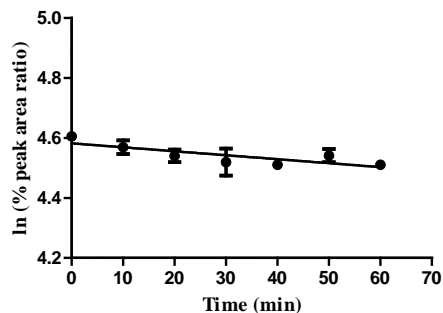

Metabolic Parameters:

Half-life:  $524 \pm 121$  min

$V_d$ :  $2000 \mu\text{L}/\text{mg}$

Intrinsic clearance:  $0.1321 \mu\text{L}/\text{min}/\text{mg}$

Metabolic Rate:  $2.642 \text{ nmol}/\text{min}/\text{mg}$

% remaining at 60 min:  $90 \pm 0.22$  %

# Mouse Liver Microsomal Assay

Principal Investigator: Dr. Alexander Arnold  
Operator: Revathi Kodali  
Test Compound: **8e**  
Concentration: 10  $\mu$ M  
Date: 09-06-2017  
Facility: Milwaukee Institute for Drug Discovery

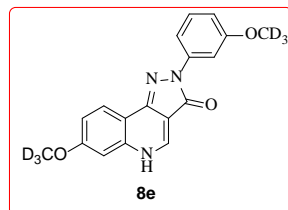

## Assay Protocol

Each evaluation included six independent assays carried out three at a time, on two different days

1. Preparation of solutions:
  - a. 1 mM test compound in DMSO.
  - b. 1  $\mu$ M 4,5 Di Phenyl Imidazole in ice cold Acetonitrile (ISTD).
2. For a total volume of Microsomal Assay Mixture (MAM) 390  $\mu$ L, sufficient for seven time points, combine the following
  - a. 282  $\mu$ L of 18.2 m $\Omega$  of water.
  - b. 80  $\mu$ L of 0.5 M potassium phosphate buffer (p<sup>H</sup> 7.4)
  - c. 20  $\mu$ L of NADPH A. (Corning life sciences, Cat # 451220)
  - d. 4  $\mu$ L of NADPH B. (Corning life sciences, Cat # 451200)
  - e. 4  $\mu$ L of test compound.
3. Sonicate MAM for 5 min and meanwhile thaw microsomes (20 mg/mL) (Life technologies, Cat # MSMC-PL) on ice.
4. Aliquot 100  $\mu$ L of ice cold ISTD into seven separate 1.5 mL conical vials and label them the time points for 0, 10, 20, 30, 40, 50, and 60 min.
5. Arrange the timer. Microsomes (Final concentration of 0.5 mg/mL) should be added to all time points except the zero time point.
6. Add 50  $\mu$ L of the MAM solution to the conical vial labelled as zero time point. Place the remaining MAM solution in the incubator (37  $^{\circ}$ C) for 5 min and initiate the reaction with addition of microsomes (8.8  $\mu$ L) and record the time.
7. At the end of each time interval remove 50  $\mu$ L and add to 100  $\mu$ L ISTD in conical vial, sonicate for 10 sec and spin down at 10,000 rpm for 5 minutes.
8. Take 100  $\mu$ L of supernatant and transfer to Spin-X HPLC filter tubes (Corning Incorporated, Cat # 8169) and centrifuge at 13,000 rpm for 5 minutes and take 5  $\mu$ L from this solution and dilute in 495  $\mu$ L of LCMS grade methanol (Fischer scientific, CAS # 67-56-1) in a 2mL glass auto sampler vial (Microsolv, Cat # 95025-WCV)
9. The samples are analyzed by LCMS-8040. (Shimadzu)

**Data:**

Day 1:

| Time (min) | Assay 1             |                | Assay 2             |                | Assay 3             |                | % remaining |         |         |
|------------|---------------------|----------------|---------------------|----------------|---------------------|----------------|-------------|---------|---------|
|            | DK-I-94-1 Peak area | ISTD Peak area | DK-I-94-1 Peak area | ISTD Peak area | DK-I-94-1 Peak area | ISTD Peak area | Assay 1     | Assay 2 | Assay 3 |
| 0          | 104572              | 99604          | 112024              | 110770         | 108778              | 96978          | 99.98       | 100.03  | 99.97   |
| 10         | 91738               | 90948          | 88211               | 90287          | 100246              | 92692          | 96.06       | 96.63   | 96.39   |
| 20         | 91764               | 95841          | 90046               | 92865          | 98441               | 94038          | 91.18       | 95.90   | 93.30   |
| 30         | 86135               | 89117          | 87391               | 93992          | 93748               | 92059          | 92.05       | 91.96   | 90.76   |
| 40         | 100441              | 100218         | 93070               | 99075          | 93657               | 90546          | 95.45       | 92.91   | 92.18   |
| 50         | 85762               | 89440          | 85410               | 89605          | 101654              | 94108          | 91.32       | 94.28   | 96.27   |
| 60         | 92817               | 99307          | 87745               | 100069         | 93007               | 91710          | 89.01       | 86.73   | 90.38   |

Table 1: Peak areas and % remaining values

Day 2:

| Time (min) | Assay 1             |                | Assay 2             |                | Assay 3             |                | (% remaining) |         |         |
|------------|---------------------|----------------|---------------------|----------------|---------------------|----------------|---------------|---------|---------|
|            | DK-I-94-1 Peak area | ISTD Peak area | DK-I-94-1 Peak area | ISTD Peak area | DK-I-94-1 Peak area | ISTD Peak area | Assay 1       | Assay 2 | Assay 3 |
| 0          | 104699              | 1018323        | 110764              | 98225          | 108659              | 96253          | 99.82         | 99.96   | 99.99   |
| 10         | 98572               | 996723         | 96734               | 93146          | 93783               | 86232          | 96.01         | 92.06   | 96.33   |
| 20         | 97486               | 965623         | 107264              | 100826         | 96862               | 90872          | 98.01         | 94.31   | 94.41   |
| 30         | 100088              | 1025797        | 110260              | 106074         | 94846               | 92762          | 94.72         | 92.15   | 90.56   |
| 40         | 97817               | 985235         | 97958               | 92817          | 91545               | 85352          | 96.39         | 93.56   | 95.00   |
| 50         | 89664               | 956232         | 98009               | 89823          | 89496               | 84533          | 91.03         | 96.73   | 93.77   |
| 60         | 91032               | 927232         | 91730               | 87674          | 99959               | 100318         | 95.31         | 92.75   | 88.25   |

Table 2: Peak areas and % remaining values

**Calculation:**

From the peak area, Calculate the following

$$\text{Peak area ratio} = \frac{\text{Peak area of test compound (DK-I-94-1)}}{\text{Peak area of internal standard (ISTD)}}$$

$$\% \text{ remaining at time T} = \frac{\text{Peak area ratio at particular time T}}{\text{Peak area ratio at zero time point}} * 100$$

(T = 0, 10, 20,30,40,50 and 60)

## DATA ANALYSIS:

### Day 1

Linear regression analysis:

Slope:  $-0.001462 \pm 0.0002736$

At X= 60, Y =  $4.498 \pm 0.009865$

$R^2 = 0.6004$

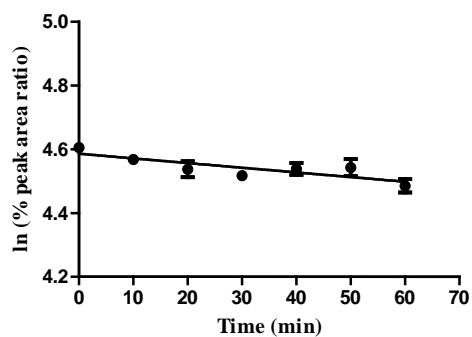

Metabolic Parameters:

Half-life:  $474 \pm 88$  min

$V_d$ :  $2000 \mu\text{L}/\text{mg}$

Intrinsic clearance:  $0.1462 \mu\text{L}/\text{min}/\text{mg}$

Metabolic Rate:  $2.924 \text{ nmol}/\text{min}/\text{mg}$

% remaining at 60 min:  $89 \pm 0.2 \%$

Note: The peak area ratios and natural log values are calculated using Microsoft excel 2010 and linear regression analysis is calculated using GraphPad prism.

### Day 2

Linear regression analysis:

Slope:  $-0.0009774 \pm 0.0002948$

At X= 60, Y =  $4.522 \pm 0.01063$

$R^2 = 0.4687$

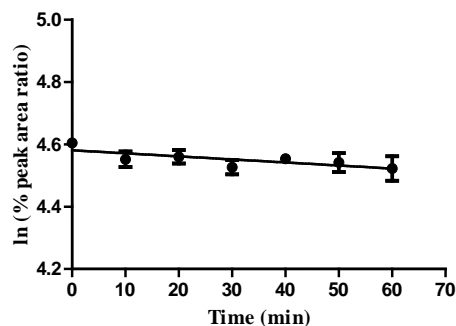

Metabolic Parameters:

Half-life:  $709 \pm 213$  min

$V_d$ :  $2000 \mu\text{L}/\text{mg}$

Intrinsic clearance:  $0.09774 \mu\text{L}/\text{min}/\text{mg}$

Metabolic Rate:  $1.9548 \text{ nmol}/\text{min}/\text{mg}$

% remaining at 60 min:  $92 \pm 0.21 \%$

# Human Liver Microsomal Assay

Principal Investigator: Dr. Alexander Arnold  
Operator: Revathi Kodali  
Test Compound: **8f**  
Concentration: 10  $\mu$ M  
Date: 09-06-2017  
Facility: Milwaukee Institute for Drug Discovery

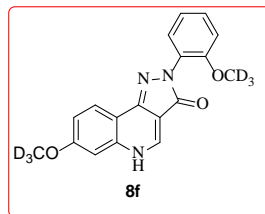

## Assay Protocol

Each evaluation included six independent assays carried out three at a time, on two different days

1. Preparation of solutions:
  - a. 1 mM test compound in DMSO.
  - b. 1  $\mu$ M 4,5 Di Phenyl Imidazole in ice cold Acetonitrile (ISTD).
2. For a total volume of Microsomal Assay Mixture (MAM) 390  $\mu$ L, sufficient for seven time points, combine the following
  - a. 282  $\mu$ L of 18.2 m $\Omega$  of water.
  - b. 80  $\mu$ L of 0.5 M potassium phosphate buffer (p<sup>H</sup> 7.4)
  - c. 20  $\mu$ L of NADPH A. (Corning life sciences, Cat # 451220)
  - d. 4  $\mu$ L of NADPH B. (Corning life sciences, Cat # 451200)
  - e. 4  $\mu$ L of test compound.
3. Sonicate MAM for 5 min and meanwhile thaw microsomes (20 mg/mL) (BD Biosciences, Cat # 452156) on ice.
4. Aliquot 100  $\mu$ L of ice cold ISTD into seven separate 1.5 mL conical vials and label them the time points for 0, 10, 20, 30, 40, 50, and 60 min.
5. Arrange the timer. Microsomes (Final concentration of 0.5 mg/mL) should be added to all time points except the zero time point.
6. Add 50  $\mu$ L of the MAM solution to the conical vial labelled as zero time point. Place the remaining MAM solution in the incubator (37  $^{\circ}$ C) for 5 min and initiate the reaction with addition of microsomes (8.8  $\mu$ L) and record the time.
7. At the end of each time interval remove 50  $\mu$ L and add to 100  $\mu$ L ISTD in conical vial, sonicate for 10 sec and spin down at 10,000 rpm for 5 minutes.
8. Take 100  $\mu$ L of supernatant and transfer to Spin-X HPLC filter tubes (Corning Incorporated, Cat # 8169) and centrifuge at 13,000 rpm for 5 minutes and take 5  $\mu$ L from this solution and dilute in 495  $\mu$ L of LCMS grade methanol (Fischer scientific, CAS # 67-56-1) in a 2mL glass auto sampler vial (Microsolv, Cat # 95025-WCV)
9. The samples are analyzed by LCMS-8040. (Shimadzu)

**Data:**

Day 1:

| Time (min) | Assay 1             |                | Assay 2             |                | Assay 3             |                | % remaining |         |         |
|------------|---------------------|----------------|---------------------|----------------|---------------------|----------------|-------------|---------|---------|
|            | DK-I-90-1 Peak area | ISTD Peak area | DK-I-90-1 Peak area | ISTD Peak area | DK-I-90-1 Peak area | ISTD Peak area | Assay 1     | Assay 2 | Assay 3 |
| 0          | 236608              | 97337          | 238736              | 98664          | 232713              | 100728         | 99.99       | 99.98   | 100.01  |
| 10         | 221427              | 95464          | 225705              | 100063         | 238008              | 110325         | 95.41       | 93.20   | 93.39   |
| 20         | 217811              | 98301          | 237758              | 101900         | 210143              | 100442         | 91.14       | 96.41   | 90.57   |
| 30         | 209423              | 93592          | 211271              | 94675          | 200168              | 93236          | 92.04       | 92.21   | 92.93   |
| 40         | 217846              | 93678          | 228590              | 100491         | 253235              | 117263         | 95.65       | 93.99   | 93.48   |
| 50         | 218429              | 98402          | 227561              | 105740         | 219220              | 100623         | 91.31       | 88.92   | 94.31   |
| 60         | 194463              | 87967          | 218960              | 98077          | 194235              | 94232          | 90.93       | 92.25   | 89.23   |

Table 1: Peak areas and % remaining values

Day 2:

| Time (min) | Assay 1             |                | Assay 2             |                | Assay 3             |                | (% remaining) |         |         |
|------------|---------------------|----------------|---------------------|----------------|---------------------|----------------|---------------|---------|---------|
|            | DK-I-90-1 Peak area | ISTD Peak area | DK-I-90-1 Peak area | ISTD Peak area | DK-I-90-1 Peak area | ISTD Peak area | Assay 1       | Assay 2 | Assay 3 |
| 0          | 238439              | 97456          | 225640              | 99282          | 232092              | 101664         | 99.98         | 99.98   | 99.99   |
| 10         | 221643              | 94344          | 214627              | 98997          | 219618              | 98274          | 96.00         | 95.38   | 97.88   |
| 20         | 213035              | 93895          | 201497              | 95083          | 213067              | 99571          | 92.72         | 93.23   | 93.73   |
| 30         | 199456              | 89662          | 198648              | 90822          | 231128              | 106927         | 90.90         | 96.22   | 94.68   |
| 40         | 226568              | 98362          | 199648              | 98765          | 210414              | 99083          | 94.13         | 88.93   | 93.01   |
| 50         | 197689              | 88901          | 227074              | 109028         | 245138              | 119022         | 90.87         | 91.62   | 90.21   |
| 60         | 244235              | 103839         | 190357              | 90631          | 233617              | 110390         | 96.12         | 92.40   | 92.69   |

Table 2: Peak areas and % remaining values

**Calculation:**

From the peak area, Calculate the following

$$\text{Peak area ratio} = \frac{\text{Peak area of test compound (DK-I-90-1)}}{\text{Peak area of internal standard (ISTD)}}$$

$$\% \text{ remaining at time T} = \frac{\text{Peak area ratio at particular time T}}{\text{Peak area ratio at zero time point}} * 100$$

(T = 0, 10, 20,30,40,50 and 60)

## DATA ANALYSIS:

### Day 1

Linear regression analysis:

Slope:  $-0.001160 \pm 0.0002806$

At X= 60, Y =  $4.505 \pm 0.01012$

$R^2 = 0.4734$

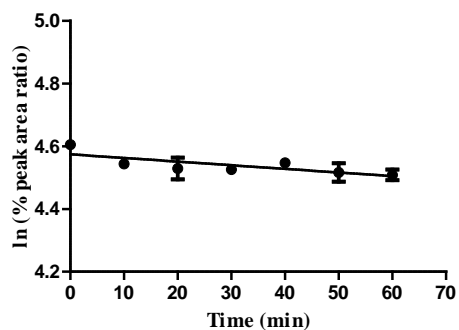

### Day 2

Linear regression analysis:

Slope:  $-0.001161 \pm 0.0002733$

At X= 60, Y =  $4.511 \pm 0.009855$

$R^2 = 0.4869$

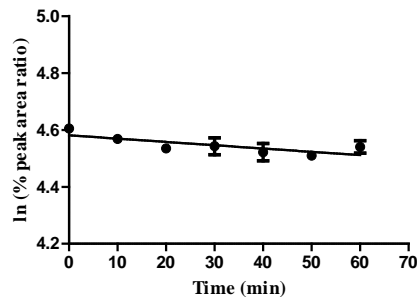

Metabolic Parameters:

Half-life:  $597 \pm 114$  min

$V_d$ :  $2000 \mu\text{L}/\text{mg}$

Intrinsic clearance:  $0.116 \mu\text{L}/\text{min}/\text{mg}$

Metabolic Rate:  $2.32 \text{ nmol}/\text{min}/\text{mg}$

% remaining at 60 min:  $90 \pm 0.20 \%$

Metabolic Parameters:

Half-life:  $596 \pm 140$  min

$V_d$ :  $2000 \mu\text{L}/\text{mg}$

Intrinsic clearance:  $0.1161 \mu\text{L}/\text{min}/\text{mg}$

Metabolic Rate:  $2.322 \text{ nmol}/\text{min}/\text{mg}$

% remaining at 60 min:  $91 \pm 0.19 \%$

Note: The peak area ratios and natural log values are calculated using Microsoft excel 2010 and linear regression analysis is calculated using GraphPad prism.



# Mouse Liver Microsomal Assay

Principal Investigator: Dr. Alexander Arnold  
Operator: Revathi Kodali  
Test Compound: **8f**  
Concentration: 10  $\mu$ M  
Date: 09-06-2017  
Facility: Milwaukee Institute for Drug Discovery

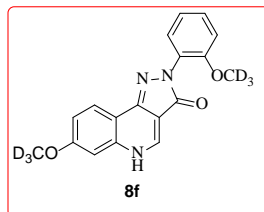

## Assay Protocol

Each evaluation included six independent assays carried out three at a time, on two different days

1. Preparation of solutions:
  - a. 1 mM test compound in DMSO.
  - b. 1  $\mu$ M 4,5 Di Phenyl Imidazole in ice cold Acetonitrile (ISTD).
2. For a total volume of Microsomal Assay Mixture (MAM) 390  $\mu$ L, sufficient for seven time points, combine the following
  - a. 282  $\mu$ L of 18.2 m $\Omega$  of water.
  - b. 80  $\mu$ L of 0.5 M potassium phosphate buffer (p<sup>H</sup> 7.4)
  - c. 20  $\mu$ L of NADPH A. (Corning life sciences, Cat # 451220)
  - d. 4  $\mu$ L of NADPH B. (Corning life sciences, Cat # 451200)
  - e. 4  $\mu$ L of test compound.
3. Sonicate MAM for 5 min and meanwhile thaw microsomes (20 mg/mL) (Life technologies, Cat # MSMC-PL) on ice.
4. Aliquot 100  $\mu$ L of ice cold ISTD into seven separate 1.5 mL conical vials and label them the time points for 0, 10, 20, 30, 40, 50, and 60 min.
5. Arrange the timer. Microsomes (Final concentration of 0.5 mg/mL) should be added to all time points except the zero time point.
6. Add 50  $\mu$ L of the MAM solution to the conical vial labelled as zero time point. Place the remaining MAM solution in the incubator (37  $^{\circ}$ C) for 5 min and initiate the reaction with addition of microsomes (8.8  $\mu$ L) and record the time.
7. At the end of each time interval remove 50  $\mu$ L and add to 100  $\mu$ L ISTD in conical vial, sonicate for 10 sec and spin down at 10,000 rpm for 5 minutes.
8. Take 100  $\mu$ L of supernatant and transfer to Spin-X HPLC filter tubes (Corning Incorporated, Cat # 8169) and centrifuge at 13,000 rpm for 5 minutes and take 5  $\mu$ L from this solution and dilute in 495  $\mu$ L of LCMS grade methanol (Fischer scientific, CAS # 67-56-1) in a 2mL glass auto sampler vial (Microsolv, Cat # 95025-WCV)
9. The samples are analyzed by LCMS-8040. (Shimadzu)

**Data:**

Day 1:

| Time (min) | Assay 1             |                | Assay 2             |                | Assay 3             |                | % remaining |         |         |
|------------|---------------------|----------------|---------------------|----------------|---------------------|----------------|-------------|---------|---------|
|            | DK-I-90-1 Peak area | ISTD Peak area | DK-I-90-1 Peak area | ISTD Peak area | DK-I-90-1 Peak area | ISTD Peak area | Assay 1     | Assay 2 | Assay 3 |
| 0          | 241015              | 101158         | 232121              | 96514          | 237717              | 97118          | 99.98       | 100.00  | 99.98   |
| 10         | 219368              | 99282          | 221359              | 100502         | 229086              | 99088          | 92.72       | 91.58   | 94.44   |
| 20         | 184449              | 86883          | 200265              | 93708          | 225289              | 98323          | 89.08       | 88.86   | 93.59   |
| 30         | 214468              | 96017          | 205879              | 93595          | 239342              | 110661         | 93.73       | 91.46   | 88.35   |
| 40         | 201613              | 87721          | 224035              | 100785         | 232965              | 102764         | 96.44       | 92.42   | 92.60   |
| 50         | 229599              | 104225         | 232073              | 100739         | 199529              | 90294          | 92.44       | 95.78   | 90.26   |
| 60         | 212634              | 98920          | 212532              | 99063          | 234749              | 102678         | 90.20       | 89.20   | 93.39   |

Table 1: Peak areas and % remaining values

Day 2:

| Time (min) | Assay 1             |                | Assay 2             |                | Assay 3             |                | (% remaining) |         |         |
|------------|---------------------|----------------|---------------------|----------------|---------------------|----------------|---------------|---------|---------|
|            | DK-I-90-1 Peak area | ISTD Peak area | DK-I-90-1 Peak area | ISTD Peak area | DK-I-90-1 Peak area | ISTD Peak area | Assay 1       | Assay 2 | Assay 3 |
| 0          | 225863              | 99888          | 232550              | 100642         | 240713              | 99946          | 100.00        | 99.98   | 100.01  |
| 10         | 209150              | 95201          | 197790              | 90137          | 229251              | 101497         | 97.16         | 94.95   | 93.80   |
| 20         | 210837              | 96633          | 235261              | 96779          | 218061              | 95274          | 96.49         | 105.19  | 95.04   |
| 30         | 207752              | 96722          | 218201              | 96298          | 210809              | 92709          | 94.99         | 98.08   | 94.43   |
| 40         | 221146              | 106906         | 226707              | 102711         | 219082              | 98772          | 91.49         | 95.50   | 92.11   |
| 50         | 219038              | 106179         | 220071              | 97924          | 245723              | 105505         | 91.23         | 97.26   | 96.72   |
| 60         | 215862              | 99176          | 242613              | 110405         | 223572              | 98877          | 96.26         | 95.08   | 93.90   |

Table 2: Peak areas and % remaining values

**Calculation:**

From the peak area, Calculate the following

$$\text{Peak area ratio} = \frac{\text{Peak area of test compound (DK-I-90-1)}}{\text{Peak area of internal standard (ISTD)}}$$

$$\% \text{ remaining at time T} = \frac{\text{Peak area ratio at particular time T}}{\text{Peak area ratio at zero time point}} * 100$$

(T = 0, 10, 20,30,40,50 and 60)

## DATA ANALYSIS:

### Day 1

Linear regression analysis:

Slope:  $-0.0008976 \pm 0.0003729$

At X= 60, Y =  $4.507 \pm 0.01345$

$R^2 = 0.2337$

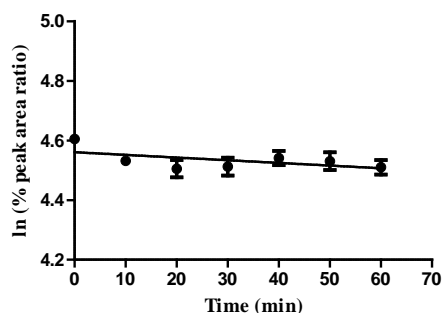

### Day 2

Linear regression analysis:

Slope:  $-0.0007750 \pm 0.0003317$

At X = 60, Y =  $4.542 \pm 0.01196$

$R^2 = 0.2232$

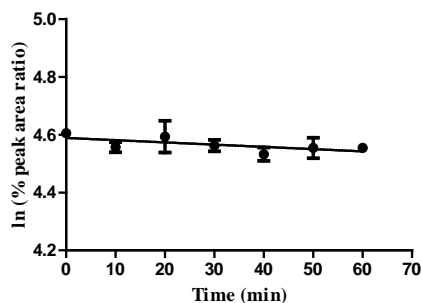

Metabolic Parameters:

Half-life:  $772 \pm 320$  min

$V_d$ :  $2000 \mu\text{L}/\text{mg}$

Intrinsic clearance:  $0.08976 \mu\text{L}/\text{min}/\text{mg}$

Metabolic Rate:  $1.7952 \text{ nmol}/\text{min}/\text{mg}$

% remaining at 60 min:  $90 \pm 0.26 \%$

Metabolic Parameters:

Half-life:  $894 \pm 382$  min

$V_d$ :  $2000 \mu\text{L}/\text{mg}$

Intrinsic clearance:  $0.0775 \mu\text{L}/\text{min}/\text{mg}$

Metabolic Rate:  $1.55 \text{ nmol}/\text{min}/\text{mg}$

% remaining at 60 min:  $94 \pm 0.25 \%$

Note: The peak area ratios and natural log values are calculated using Microsoft excel 2010 and linear regression analysis is calculated using GraphPad prism.

# Human Liver Microsomal Assay

Principal Investigator: Dr. Alexander Arnold

Operator: Revathi Kodali

Test Compound: **8g**

Concentration: 10  $\mu$ M

Date: 02-28-2017

Facility: Milwaukee Institute for Drug Discovery

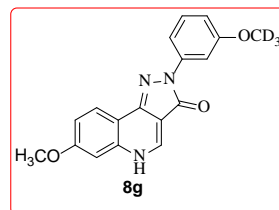

## Assay Protocol

Each evaluation included six independent assays carried out three at a time, on two different days

1. Preparation of solutions:
  - a. 1 mM test compound in DMSO.
  - b. 2  $\mu$ M Verapamil in ice cold Acetonitrile (ISTD).
2. For a total volume of Microsomal Assay Mixture (MAM) 390  $\mu$ L, sufficient for seven time points, combine the following
  - a. 282  $\mu$ L of 18.2 m $\Omega$  of water.
  - b. 80  $\mu$ L of 0.5 M potassium phosphate buffer (p<sup>H</sup> 7.4)
  - c. 20  $\mu$ L of NADPH A. (Corning life sciences, Cat # 451220)
  - d. 4  $\mu$ L of NADPH B. (Corning life sciences, Cat # 451200)
  - e. 4  $\mu$ L of test compound.
3. Sonicate MAM for 5 min and meanwhile thaw microsomes (20 mg/mL) (BD Gentest, Cat # 452156) on ice.
4. Aliquot 100  $\mu$ L of ice cold ISTD into seven separate 1.5 mL conical vials and label them the time points for 0, 10, 20, 30, 40, 50, and 60 min.
5. Arrange the timer. Microsomes (Final concentration of 0.5 mg/mL) should be added to all time points except the zero time point.
6. Add 50  $\mu$ L of the MAM solution to the conical vial labelled as zero time point. Place the remaining MAM solution in the incubator (37 °C) for 5 min and initiate the reaction with addition of microsomes (8.8  $\mu$ L) and record the time.
7. At the end of each time interval remove 50  $\mu$ L and add to 100  $\mu$ L ISTD in conical vial, sonicate for 10 sec and spin down at 10,000 rpm for 5 minutes.
8. Take 100  $\mu$ L of supernatant and transfer to Spin-X HPLC filter tubes (Corning Incorporated, Cat # 8169) and centrifuge at 13,000 rpm for 5 minutes and take 5  $\mu$ L from this solution and dilute in 495  $\mu$ L of LCMS grade methanol (Fischer scientific, CAS # 67-56-1) in a 2mL glass auto sampler vial (Microsolv, Cat # 95025-WCV)
9. The samples are analyzed by LCMS-8040. (Shimadzu)

**Data:**

Day 1:

| Time (min) | Assay 1              |                     | Assay 2              |                     | Assay 3              |                     | % remaining |         |         |
|------------|----------------------|---------------------|----------------------|---------------------|----------------------|---------------------|-------------|---------|---------|
|            | DK-II-69-1 Peak area | Verapamil Peak area | DK-II-69-1 Peak area | Verapamil Peak area | DK-II-69-1 Peak area | Verapamil Peak area | Assay 1     | Assay 2 | Assay 3 |
| 0          | 146343               | 225342              | 139505               | 220893              | 152522               | 221744              | 100.06      | 99.92   | 99.97   |
| 10         | 133193               | 223873              | 132626               | 221883              | 149931               | 227834              | 91.67       | 94.57   | 95.65   |
| 20         | 115456               | 200892              | 128584               | 220983              | 135453               | 223843              | 88.55       | 92.06   | 87.95   |
| 30         | 116606               | 211893              | 122428               | 224909              | 133485               | 230781              | 84.79       | 86.13   | 84.07   |
| 40         | 116438               | 218734              | 120510               | 222874              | 135799               | 227843              | 82.02       | 85.55   | 86.63   |
| 50         | 120161               | 220183              | 117807               | 212843              | 126294               | 223847              | 84.08       | 87.57   | 82.00   |
| 60         | 119406               | 212672              | 113426               | 213974              | 124042               | 211893              | 86.51       | 83.87   | 85.08   |

Table 1: Peak areas and % remaining values

Day 2:

| Time (min) | Assay 1              |                     | Assay 2              |                     | Assay 3              |                     | (% remaining) |         |         |
|------------|----------------------|---------------------|----------------------|---------------------|----------------------|---------------------|---------------|---------|---------|
|            | DK-II-69-1 Peak area | Verapamil Peak area | DK-II-69-1 Peak area | Verapamil Peak area | DK-II-69-1 Peak area | Verapamil Peak area | Assay 1       | Assay 2 | Assay 3 |
| 0          | 145576               | 233083              | 151061               | 221893              | 153983               | 219878              | 99.93         | 99.96   | 100.04  |
| 10         | 142272               | 241983              | 147544               | 226132              | 144817               | 220613              | 94.07         | 95.81   | 93.77   |
| 20         | 128656               | 220834              | 140312               | 220633              | 138088               | 219723              | 93.21         | 93.38   | 89.78   |
| 30         | 121095               | 221089              | 130976               | 219734              | 131811               | 220782              | 87.63         | 87.52   | 85.28   |
| 40         | 119820               | 220891              | 124223               | 216734              | 133859               | 221067              | 86.79         | 84.16   | 86.50   |
| 50         | 116786               | 221373              | 121034               | 220874              | 128083               | 221074              | 84.40         | 80.46   | 82.76   |
| 60         | 116967               | 224090              | 119293               | 212894              | 126552               | 223097              | 83.51         | 82.28   | 81.03   |

Table 2: Peak areas and % remaining values

**Calculation:**

From the peak area, Calculate the following

$$\text{Peak area ratio} = \frac{\text{Peak area of test compound (DK-II-69-1)}}{\text{Peak area of internal standard (Verapamil)}}$$

$$\% \text{ remaining at time T} = \frac{\text{Peak area ratio at particular time T}}{\text{Peak area ratio at zero time point}} * 100$$

(T = 0, 10, 20,30,40,50 and 60)

## DATA ANALYSIS:

### Day 1

Linear regression analysis:

Slope:  $-0.002671 \pm 0.0003856$

At X= 60, Y =  $4.406 \pm 0.01390$

$R^2 = 0.7164$

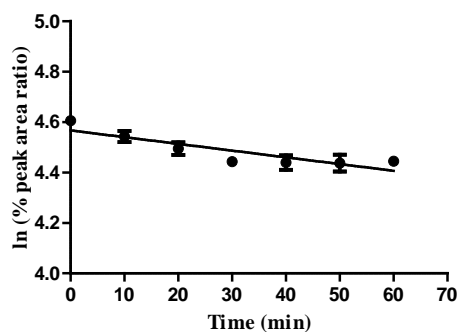

### Day 2

Linear regression analysis:

Slope:  $-0.003312 \pm 0.0002282$

At X = 60, Y =  $4.389 \pm 0.008229$

$R^2 = 0.9172$

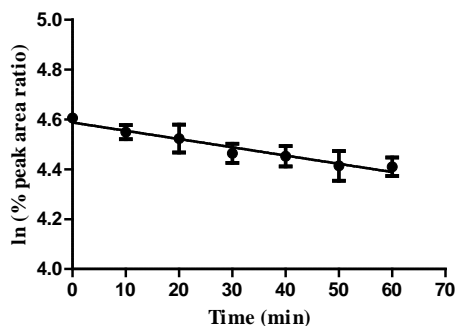

Metabolic Parameters:

Half-life:  $259 \pm 37.4$  min

$V_d$ :  $2000 \mu\text{L}/\text{mg}$

Intrinsic clearance:  $0.2671 \mu\text{L}/\text{min}/\text{mg}$

Metabolic Rate:  $5.342 \text{ nmol}/\text{min}/\text{mg}$

% remaining at 60 min:  $82 \pm 0.26 \%$

Metabolic Parameters:

Half-life:  $209 \pm 14$  min

$V_d$ :  $2000 \mu\text{L}/\text{mg}$

Intrinsic clearance:  $0.3312 \mu\text{L}/\text{min}/\text{mg}$

Metabolic Rate:  $6.624 \text{ nmol}/\text{min}/\text{mg}$

% remaining at 60 min:  $80.55 \pm 0.15 \%$

Note: The peak area ratios and natural log values are calculated using Microsoft excel 2010 and linear regression analysis is calculated using GraphPad prism.

# Mouse Liver Microsomal Assay

Principal Investigator: Dr. Alexander Arnold

Operator: Revathi Kodali

Test Compound: **8g**

Concentration: 10  $\mu$ M

Date: 02-28-2017

Facility: Milwaukee Institute for Drug Discovery

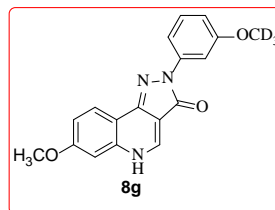

## Assay Protocol

Each evaluation included six independent assays carried out three at a time, on two different days

1. Preparation of solutions:
  - a. 1 mM test compound in DMSO.
  - b. 2  $\mu$ M Verapamil in ice cold Acetonitrile (ISTD).
2. For a total volume of Microsomal Assay Mixture (MAM) 390  $\mu$ L, sufficient for seven time points, combine the following
  - a. 282  $\mu$ L of 18.2 m $\Omega$  of water.
  - b. 80  $\mu$ L of 0.5 M potassium phosphate buffer (p<sup>H</sup> 7.4)
  - c. 20  $\mu$ L of NADPH A. (Corning life sciences, Cat # 451220)
  - d. 4  $\mu$ L of NADPH B. (Corning life sciences, Cat # 451200)
  - e. 4  $\mu$ L of test compound.
3. Sonicate MAM for 5 min and meanwhile thaw microsomes (20 mg/mL) (Life technologies Cat # MSMC-PL) on ice.
4. Aliquot 100  $\mu$ L of ice cold ISTD into seven separate 1.5 mL conical vials and label them the time points for 0, 10, 20, 30, 40, 50, and 60 min.
5. Arrange the timer. Microsomes (Final concentration of 0.5 mg/mL) should be added to all time points except the zero time point.
6. Add 50  $\mu$ L of the MAM solution to the conical vial labelled as zero time point. Place the remaining MAM solution in the incubator (37 °C) for 5 min and initiate the reaction with addition of microsomes (8.8  $\mu$ L) and record the time.
7. At the end of each time interval remove 50  $\mu$ L and add to 100  $\mu$ L ISTD in conical vial, sonicate for 10 sec and spin down at 10,000 rpm for 5 minutes.
8. Take 100  $\mu$ L of supernatant and transfer to Spin-X HPLC filter tubes (Corning Incorporated, Cat # 8169) and centrifuge at 13,000 rpm for 5 minutes and take 5  $\mu$ L from this solution and dilute in 495  $\mu$ L of LCMS grade methanol (Fischer scientific, CAS # 67-56-1) in a 2mL glass auto sampler vial (Microsolv, Cat # 95025-WCV)
9. The samples are analyzed by LCMS-8040. (Shimadzu)

**Data:**

Day 1:

| Time (min) | Assay 1              |                     | Assay 2              |                     | Assay 3              |                     | % remaining |         |         |
|------------|----------------------|---------------------|----------------------|---------------------|----------------------|---------------------|-------------|---------|---------|
|            | DK-II-69-1 Peak area | Verapamil Peak area | DK-II-69-1 Peak area | Verapamil Peak area | DK-II-69-1 Peak area | Verapamil Peak area | Assay 1     | Assay 2 | Assay 3 |
| 0          | 153307               | 220362              | 161694               | 223187              | 148441               | 225613              | 99.95       | 100.06  | 99.99   |
| 10         | 149050               | 221782              | 156208               | 231089              | 139993               | 226741              | 96.56       | 93.36   | 93.83   |
| 20         | 142585               | 217634              | 149017               | 218634              | 138699               | 221387              | 94.13       | 94.14   | 95.21   |
| 30         | 146408               | 219723              | 149645               | 226164              | 136482               | 230012              | 95.73       | 91.39   | 90.17   |
| 40         | 139114               | 220782              | 154545               | 226383              | 134468               | 221634              | 90.53       | 94.29   | 92.20   |
| 50         | 143809               | 220173              | 155963               | 224613              | 132242               | 212421              | 93.84       | 95.90   | 94.61   |
| 60         | 145754               | 221723              | 154323               | 231083              | 138278               | 230781              | 94.45       | 92.24   | 91.06   |

Table 1: Peak areas and % remaining values

Day 2:

| Time (min) | Assay 1              |                     | Assay 2              |                     | Assay 3              |                     | (% remaining) |         |         |
|------------|----------------------|---------------------|----------------------|---------------------|----------------------|---------------------|---------------|---------|---------|
|            | DK-II-69-1 Peak area | Verapamil Peak area | DK-II-69-1 Peak area | Verapamil Peak area | DK-II-69-1 Peak area | Verapamil Peak area | Assay 1       | Assay 2 | Assay 3 |
| 0          | 166184               | 221467              | 149474               | 221074              | 163260               | 220843              | 100.05        | 100.01  | 100.03  |
| 10         | 161409               | 230864              | 144162               | 222673              | 150466               | 221384              | 93.22         | 95.77   | 91.97   |
| 20         | 152157               | 221784              | 142196               | 221774              | 156739               | 220834              | 91.47         | 94.84   | 96.04   |
| 30         | 149888               | 221074              | 136979               | 220734              | 152815               | 221783              | 90.40         | 91.79   | 93.23   |
| 40         | 156102               | 223687              | 139293               | 230084              | 149011               | 224018              | 93.04         | 89.55   | 90.01   |
| 50         | 157420               | 217784              | 140291               | 221976              | 151630               | 223084              | 96.37         | 93.49   | 91.97   |
| 60         | 155484               | 218744              | 141615               | 220844              | 153046               | 220834              | 94.77         | 94.85   | 93.78   |

Table 2: Peak areas and % remaining values

**Calculation:**

From the peak area, Calculate the following

$$\text{Peak area ratio} = \frac{\text{Peak area of test compound (DK-II-69-1)}}{\text{Peak area of internal standard (Verapamil)}}$$

$$\% \text{ remaining at time T} = \frac{\text{Peak area ratio at particular time T}}{\text{Peak area ratio at zero time point}} * 100$$

(T = 0, 10, 20,30,40,50 and 60)



## DATA ANALYSIS:

### Day 1

Linear regression analysis:

Slope:  $-0.0008976 \pm 0.0002707$

At X= 60, Y =  $4.521 \pm 0.009762$

$R^2 = 0.3665$

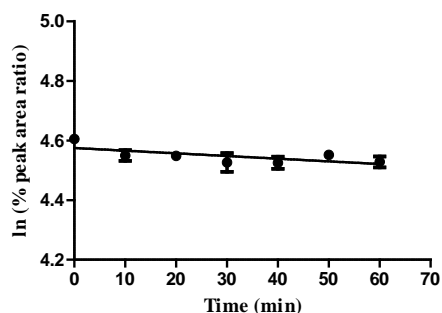

### Day 2

Linear regression analysis:

Slope:  $-0.0007190 \pm 0.0003285$

At X = 60, Y =  $4.523 \pm 0.01184$

$R^2 = 0.2014$

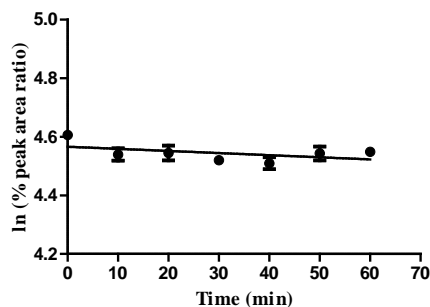

Metabolic Parameters:

Half-life:  $772 \pm 233$  min

$V_d$ :  $2000 \mu\text{L}/\text{mg}$

Intrinsic clearance:  $0.08976 \mu\text{L}/\text{min}/\text{mg}$

Metabolic Rate:  $1.8 \text{ nmol}/\text{min}/\text{mg}$

% remaining at 60 min:  $91 \pm 0.20 \%$

Metabolic Parameters:

Half-life:  $963 \pm 440$  min

$V_d$ :  $2000 \mu\text{L}/\text{mg}$

Intrinsic clearance:  $0.0719 \mu\text{L}/\text{min}/\text{mg}$

Metabolic Rate:  $1.438 \text{ nmol}/\text{min}/\text{mg}$

% remaining at 60 min:  $92.11 \pm 0.42 \%$

Note: The peak area ratios and natural log values are calculated using Microsoft excel 2010 and linear regression analysis is calculated using GraphPad prism.

# Human Liver Microsomal Assay

Principal Investigator: Dr. Alexander Arnold

Operator: Revathi Kodali

Test Compound: **8h**

Concentration: 10  $\mu$ M

Date: 08-15-2016

Facility: Milwaukee Institute for Drug Discovery

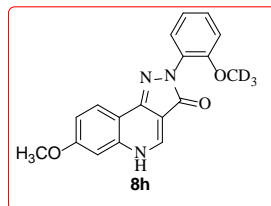

## Assay Protocol

Each evaluation included six independent assays carried out three at a time, on two different days

1. Preparation of solutions:
  - a. 1 mM test compound in DMSO.
  - b. 1  $\mu$ M 4,5 Di Phenyl Imidazole in ice cold Acetonitrile (ISTD).
2. For a total volume of Microsomal Assay Mixture (MAM) 390  $\mu$ L, sufficient for seven time points, combine the following
  - a. 282  $\mu$ L of 18.2 m $\Omega$  of water.
  - b. 80  $\mu$ L of 0.5 M potassium phosphate buffer (p<sup>H</sup> 7.4)
  - c. 20  $\mu$ L of NADPH A. (Corning life sciences, Cat # 451220)
  - d. 4  $\mu$ L of NADPH B. (Corning life sciences, Cat # 451200)
  - e. 4  $\mu$ L of test compound.
3. Sonicate MAM for 5 min and meanwhile thaw microsomes (20 mg/mL) (BD Biosciences, Cat # 452156) on ice.
4. Aliquot 100  $\mu$ L of ice cold ISTD into seven separate 1.5 mL conical vials and label them the time points for 0, 10, 20, 30, 40, 50, and 60 min.
5. Arrange the timer. Microsomes (Final concentration of 0.5 mg/mL) should be added to all time points except the zero time point.
6. Add 50  $\mu$ L of the MAM solution to the conical vial labelled as zero time point. Place the remaining MAM solution in the incubator (37  $^{\circ}$ C) for 5 min and initiate the reaction with addition of microsomes (8.8  $\mu$ L) and record the time.
7. At the end of each time interval remove 50  $\mu$ L and add to 100  $\mu$ L ISTD in conical vial, sonicate for 10 sec and spin down at 10,000 rpm for 5 minutes.
8. Take 100  $\mu$ L of supernatant and transfer to Spin-X HPLC filter tubes (Corning Incorporated, Cat # 8169) and centrifuge at 13,000 rpm for 5 minutes and take 5  $\mu$ L from this solution and dilute in 495  $\mu$ L of LCMS grade methanol (Fischer scientific, CAS # 67-56-1) in a 2mL glass auto sampler vial (Microsolv, Cat # 95025-WCV)
9. The samples are analyzed by LCMS-8040. (Shimadzu)

**Data:**

Day 1:

| Time (min) | Assay 1             |                | Assay 2             |                | Assay 3             |                | % remaining |         |         |
|------------|---------------------|----------------|---------------------|----------------|---------------------|----------------|-------------|---------|---------|
|            | DK-I-88-1 Peak area | ISTD Peak area | DK-I-88-1 Peak area | ISTD Peak area | DK-I-88-1 Peak area | ISTD Peak area | Assay 1     | Assay 2 | Assay 3 |
| 0          | 6000289             | 1978232        | 5748309             | 1978368        | 5972862             | 1976526        | 100.00      | 99.98   | 99.99   |
| 10         | 5901413             | 1976237        | 5536714             | 1962372        | 5691768             | 1967236        | 98.45       | 97.09   | 95.74   |
| 20         | 5359689             | 1986821        | 5121505             | 1956326        | 5328681             | 1972367        | 88.94       | 90.08   | 89.40   |
| 30         | 4963413             | 1896723        | 5038993             | 2089872        | 5116871             | 1962373        | 86.27       | 82.97   | 86.28   |
| 40         | 5041133             | 2004384        | 4914971             | 2000832        | 4926787             | 2000838        | 82.92       | 84.53   | 81.48   |
| 50         | 5063056             | 1978278        | 4897310             | 1977634        | 5029505             | 1962727        | 84.38       | 85.21   | 84.79   |
| 60         | 4821518             | 1976267        | 4696893             | 1967623        | 4942498             | 1978367        | 80.43       | 82.14   | 82.66   |

Table 1: Peak areas and % remaining values

Day 2:

| Time (min) | Assay 1             |                | Assay 2             |                | Assay 3             |                | (% remaining) |         |         |
|------------|---------------------|----------------|---------------------|----------------|---------------------|----------------|---------------|---------|---------|
|            | DK-I-88-1 Peak area | ISTD Peak area | DK-I-88-1 Peak area | ISTD Peak area | DK-I-88-1 Peak area | ISTD Peak area | Assay 1       | Assay 2 | Assay 3 |
| 0          | 5779507             | 1987367        | 5999039             | 1987362        | 5972450             | 2000712        | 100.00        | 99.98   | 100.00  |
| 10         | 5360319             | 1978234        | 5686090             | 1978872        | 5660860             | 1997326        | 93.17         | 95.17   | 94.94   |
| 20         | 5169958             | 1936478        | 5426852             | 1978382        | 5350046             | 1972366        | 91.80         | 90.86   | 90.87   |
| 30         | 4896189             | 1965272        | 5125434             | 1923438        | 5107424             | 1978723        | 85.67         | 88.26   | 86.47   |
| 40         | 4817341             | 1976362        | 5036722             | 1942562        | 4940485             | 1982356        | 83.82         | 85.88   | 83.49   |
| 50         | 4729919             | 1976326        | 4850232             | 1897823        | 4826268             | 1972367        | 82.30         | 84.65   | 81.97   |
| 60         | 4835545             | 1956347        | 4921510             | 1987231        | 4795722             | 1956237        | 84.99         | 82.03   | 82.12   |

Table 2: Peak areas and % remaining values

**Calculation:**

From the peak area, Calculate the following

$$\text{Peak area ratio} = \frac{\text{Peak area of test compound (DK-I-88-1)}}{\text{Peak area of internal standard (ISTD)}}$$

$$\% \text{ remaining at time T} = \frac{\text{Peak area ratio at particular time T}}{\text{Peak area ratio at zero time point}} * 100$$

(T = 0, 10, 20,30,40,50 and 60)

## DATA ANALYSIS:

### Day 1

Linear regression analysis:

Slope:  $-0.003402 \pm 0.0003355$

At X= 60, Y =  $4.381 \pm 0.01210$

$R^2 = 0.8440$

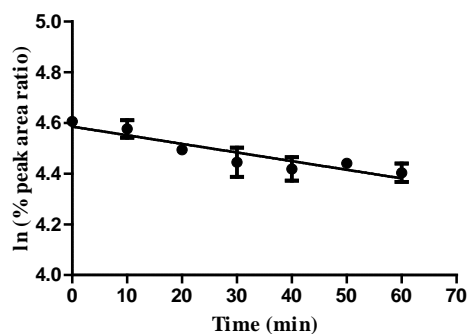

Metabolic Parameters:

Half-life:  $203.70 \pm 20.88$  min

$V_d$ : 2000  $\mu\text{L}/\text{mg}$

Intrinsic clearance: 0.3402  $\mu\text{L}/\text{min}/\text{mg}$

Metabolic Rate: 6.804 nmol/min/mg

% remaining at 60 min:  $79.19 \pm 0.22$  %

### Day 2

Linear regression analysis:

Slope:  $-0.003190 \pm 0.0002445$

At X = 60, Y =  $4.390 \pm 0.008814$

$R^2 = 0.8997$

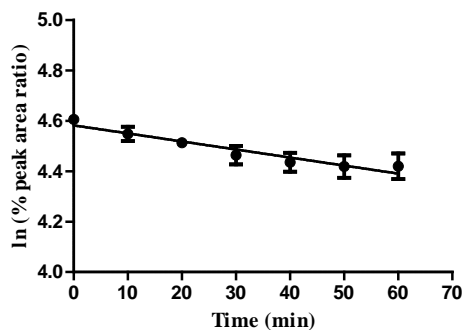

Metabolic Parameters:

Half-life:  $217.24 \pm 16.65$  min

$V_d$ : 2000  $\mu\text{L}/\text{mg}$

Intrinsic clearance: 0.319  $\mu\text{L}/\text{min}/\text{mg}$

Metabolic Rate: 6.38 nmol/min/mg

% remaining at 60 min:  $80.64 \pm 0.16$  %

Note: The peak area ratios and natural log values are calculated using Microsoft excel 2010 and linear regression analysis is calculated using GraphPad prism.

# Mouse Liver Microsomal Assay

Principal Investigator: Dr. Alexander Arnold

Operator: Revathi Kodali

Test Compound: **8h**

Concentration: 10  $\mu$ M

Date: 08-15-2016

Facility: Milwaukee Institute for Drug Discovery

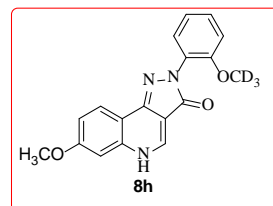

## Assay Protocol

Each evaluation included six independent assays carried out three at a time, on two different days

1. Preparation of solutions:
  - a. 1 mM test compound in DMSO.
  - b. 1  $\mu$ M 4,5 Di Phenyl Imidazole in ice cold Acetonitrile (ISTD).
2. For a total volume of Microsomal Assay Mixture (MAM) 390  $\mu$ L, sufficient for seven time points, combine the following
  - a. 282  $\mu$ L of 18.2 m $\Omega$  of water.
  - b. 80  $\mu$ L of 0.5 M potassium phosphate buffer (p<sup>H</sup> 7.4)
  - c. 20  $\mu$ L of NADPH A. (Corning life sciences, Cat # 451220)
  - d. 4  $\mu$ L of NADPH B. (Corning life sciences, Cat # 451200)
  - e. 4  $\mu$ L of test compound.
3. Sonicate MAM for 5 min and meanwhile thaw microsomes (20 mg/mL) (Life technologies, Cat # MSMC-PL) on ice.
4. Aliquot 100  $\mu$ L of ice cold ISTD into seven separate 1.5 mL conical vials and label them the time points for 0, 10, 20, 30, 40, 50, and 60 min.
5. Arrange the timer. Microsomes (Final concentration of 0.5 mg/mL) should be added to all time points except the zero time point.
6. Add 50  $\mu$ L of the MAM solution to the conical vial labelled as zero time point. Place the remaining MAM solution in the incubator (37 °C) for 5 min and initiate the reaction with addition of microsomes (8.8  $\mu$ L) and record the time.
7. At the end of each time interval remove 50  $\mu$ L and add to 100  $\mu$ L ISTD in conical vial, sonicate for 10 sec and spin down at 10,000 rpm for 5 minutes.
8. Take 100  $\mu$ L of supernatant and transfer to Spin-X HPLC filter tubes (Corning Incorporated, Cat # 8169) and centrifuge at 13,000 rpm for 5 minutes and take 5  $\mu$ L from this solution and dilute in 495  $\mu$ L of LCMS grade methanol (Fischer scientific, CAS # 67-56-1) in a 2mL glass auto sampler vial (Microsolv, Cat # 95025-WCV)
9. The samples are analyzed by LCMS-8040. (Shimadzu)

**Data:**

Day 1:

| Time (min) | Assay 1             |                | Assay 2             |                | Assay 3             |                | % remaining |         |         |
|------------|---------------------|----------------|---------------------|----------------|---------------------|----------------|-------------|---------|---------|
|            | DK-I-88-1 Peak area | ISTD Peak area | DK-I-88-1 Peak area | ISTD Peak area | DK-I-88-1 Peak area | ISTD Peak area | Assay 1     | Assay 2 | Assay 3 |
| 0          | 5864208             | 1923424        | 5986197             | 1923456        | 6104405             | 1986723        | 99.99       | 100.00  | 99.98   |
| 10         | 5842143             | 2001663        | 5946613             | 2000102        | 5915367             | 1945623        | 95.72       | 95.53   | 98.93   |
| 20         | 5901471             | 1946432        | 5800697             | 1986746        | 5952081             | 2000103        | 99.44       | 93.82   | 96.84   |
| 30         | 5730111             | 1923513        | 5881350             | 1959021        | 5742564             | 1976326        | 97.70       | 96.47   | 94.55   |
| 40         | 5654542             | 1968542        | 5896694             | 1943252        | 5652491             | 1928635        | 94.21       | 97.50   | 95.37   |
| 50         | 5524788             | 1951543        | 5744072             | 1956723        | 5542147             | 1962538        | 92.85       | 94.33   | 91.89   |
| 60         | 5612563             | 1954739        | 5686981             | 1921344        | 5698561             | 1964251        | 94.17       | 95.11   | 94.40   |

Table 1: Peak areas and % remaining values

Day 2:

| Time (min) | Assay 1             |                | Assay 2             |                | Assay 3             |                | (% remaining) |         |         |
|------------|---------------------|----------------|---------------------|----------------|---------------------|----------------|---------------|---------|---------|
|            | DK-I-88-1 Peak area | ISTD Peak area | DK-I-88-1 Peak area | ISTD Peak area | DK-I-88-1 Peak area | ISTD Peak area | Assay 1       | Assay 2 | Assay 3 |
| 0          | 5984998             | 2034364        | 5968027             | 1998737        | 6002413             | 2098478        | 99.99         | 99.99   | 100.01  |
| 10         | 5824131             | 1987474        | 5806107             | 1962761        | 5701055             | 1998834        | 99.60         | 99.06   | 99.72   |
| 20         | 5507668             | 1923454        | 5702257             | 1978383        | 5563421             | 2001543        | 97.32         | 96.52   | 97.18   |
| 30         | 5502585             | 1978848        | 5750415             | 1957672        | 5417161             | 1976832        | 94.51         | 98.37   | 95.81   |
| 40         | 5287891             | 1923646        | 5658083             | 1998922        | 5306658             | 2008383        | 93.43         | 94.79   | 92.38   |
| 50         | 5558948             | 1996765        | 5642027             | 1956732        | 5300999             | 1988734        | 94.62         | 96.56   | 93.20   |
| 60         | 5652513             | 2087247        | 5532053             | 1981238        | 5234824             | 1978724        | 92.05         | 93.51   | 92.50   |

Table 2: Peak areas and % remaining values

**Calculation:**

From the peak area, Calculate the following

$$\text{Peak area ratio} = \frac{\text{Peak area of test compound (DK-I-88-1)}}{\text{Peak area of internal standard (ISTD)}}$$

$$\% \text{ remaining at time T} = \frac{\text{Peak area ratio at particular time T}}{\text{Peak area ratio at zero time point}} * 100$$

(T = 0, 10, 20,30,40,50 and 60)

## DATA ANALYSIS:

### Day 1

Linear regression analysis:

Slope:  $-0.0009083 \pm 0.0001941$

At X= 60, Y =  $4.538 \pm 0.006998$

$R^2 = 0.5355$

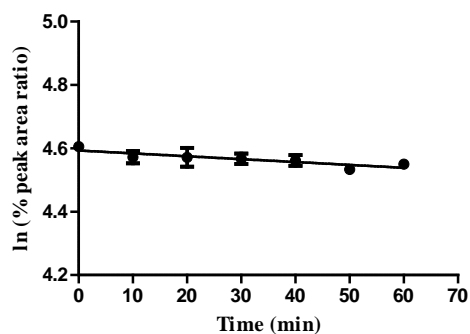

Metabolic Parameters:

Half-life:  $762.96 \pm 163.04$  min

$V_d$ : 2000  $\mu\text{L}/\text{mg}$

Intrinsic clearance:  $0.09083 \mu\text{L}/\text{min}/\text{mg}$

Metabolic Rate:  $1.8166 \text{ nmol}/\text{min}/\text{mg}$

% remaining at 60 min:  $93.50 \pm 0.14$  %

### Day 2

Linear regression analysis:

Slope:  $-0.001288 \pm 0.0001431$

At X = 60, Y =  $4.528 \pm 0.005159$

$R^2 = 0.8101$

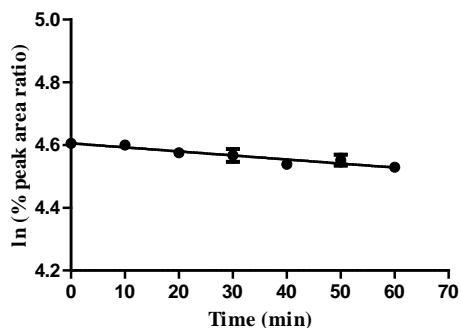

Metabolic Parameters:

Half-life:  $538.04 \pm 59.97$  min

$V_d$ : 2000  $\mu\text{L}/\text{mg}$

Intrinsic clearance:  $0.1288 \mu\text{L}/\text{min}/\text{mg}$

Metabolic Rate:  $2.576 \text{ nmol}/\text{min}/\text{mg}$

% remaining at 60 min:  $92.57 \pm 0.10$  %

Note: The peak area ratios and natural log values are calculated using Microsoft excel 2010 and linear regression analysis is calculated using GraphPad prism.

# Human Liver Microsomal Assay

Principal Investigator: Dr. Alexander Arnold

Operator: Revathi Kodali

Test Compound: **13a**

Concentration: 10  $\mu$ M

Date: 04-04-2016

Facility: Milwaukee Institute for Drug Discovery

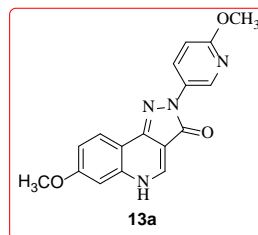

## Assay Protocol

Each evaluation included six independent assays carried out three at a time, on two different days

1. Preparation of solutions:
  - a. 1 mM test compound in DMSO.
  - b. 2  $\mu$ M Verapamil in ice cold Acetonitrile (ISTD).
2. For a total volume of Microsomal Assay Mixture (MAM) 390  $\mu$ L, sufficient for seven time points, combine the following
  - a. 282  $\mu$ L of 18.2 m $\Omega$  of water.
  - b. 80  $\mu$ L of 0.5 M potassium phosphate buffer (p<sup>H</sup> 7.4)
  - c. 20  $\mu$ L of NADPH A. (Corning life sciences, Cat # 451220)
  - d. 4  $\mu$ L of NADPH B. (Corning life sciences, Cat # 451200)
  - e. 4  $\mu$ L of test compound.
3. Sonicate MAM for 5 min and meanwhile thaw microsomes (20 mg/mL) (BD Gentest, Cat # 452156) on ice.
4. Aliquot 100  $\mu$ L of ice cold ISTD into seven separate 1.5 mL conical vials and label them the time points for 0, 10, 20, 30, 40, 50, and 60 min.
5. Arrange the timer. Microsomes (Final concentration of 0.5 mg/mL) should be added to all time points except the zero time point.
6. Add 50  $\mu$ L of the MAM solution to the conical vial labelled as zero time point. Place the remaining MAM solution in the incubator (37 °C) for 5 min and initiate the reaction with addition of microsomes (8.8  $\mu$ L) and record the time.
7. At the end of each time interval remove 50  $\mu$ L and add to 100  $\mu$ L ISTD in conical vial, sonicate for 10 sec and spin down at 10,000 rpm for 5 minutes.
8. Take 100  $\mu$ L of supernatant and transfer to Spin-X HPLC filter tubes (Corning Incorporated, Cat # 8169) and centrifuge at 13,000 rpm for 5 minutes and take 5  $\mu$ L from this solution and dilute in 495  $\mu$ L of LCMS grade methanol (Fischer scientific, CAS # 67-56-1) in a 2mL glass auto sampler vial (Microsolv, Cat # 95025-WCV)
9. The samples are analyzed by LCMS-8040. (Shimadzu)



**Data:**

Day 1:

| Time (min) | Assay 1              |                     | Assay 2              |                     | Assay 3              |                     | % remaining |         |         |
|------------|----------------------|---------------------|----------------------|---------------------|----------------------|---------------------|-------------|---------|---------|
|            | DK-II-13-1 Peak area | Verapamil Peak area | DK-II-13-1 Peak area | Verapamil Peak area | DK-II-13-1 Peak area | Verapamil Peak area | Assay 1     | Assay 2 | Assay 3 |
| 0          | 1481304              | 2370706             | 1498648              | 2486412             | 1501602              | 2348705             | 99.97       | 99.95   | 100.05  |
| 10         | 1456174              | 2437087             | 1350839              | 2314930             | 1463439              | 2365630             | 95.60       | 96.77   | 96.81   |
| 20         | 1404302              | 2411877             | 1255093              | 2237002             | 1456023              | 2412311             | 93.15       | 93.04   | 94.45   |
| 30         | 1389377              | 2345148             | 1412423              | 2551510             | 1491949              | 2508806             | 94.79       | 91.80   | 93.06   |
| 40         | 1388276              | 2362279             | 1458393              | 2570550             | 1464132              | 2402739             | 94.03       | 94.08   | 95.36   |
| 50         | 1340079              | 2326528             | 1421667              | 2590384             | 1449469              | 2462260             | 92.16       | 91.01   | 92.12   |
| 60         | 1379227              | 2321871             | 1490076              | 2602566             | 1523329              | 2540953             | 95.04       | 94.94   | 93.82   |

Table 1: Peak areas and % remaining values

Day 2:

| Time (min) | Assay 1              |                     | Assay 2              |                     | Assay 3              |                     | (% remaining) |         |         |
|------------|----------------------|---------------------|----------------------|---------------------|----------------------|---------------------|---------------|---------|---------|
|            | DK-II-13-1 Peak area | Verapamil Peak area | DK-II-13-1 Peak area | Verapamil Peak area | DK-II-13-1 Peak area | Verapamil Peak area | Assay 1       | Assay 2 | Assay 3 |
| 0          | 1399330              | 2454869             | 1450558              | 2502725             | 1427070              | 2455486             | 100.00        | 99.93   | 100.03  |
| 10         | 1429964              | 2553664             | 1368760              | 2437443             | 1484773              | 2607335             | 98.24         | 96.82   | 98.01   |
| 20         | 1446883              | 2656111             | 1351638              | 2507523             | 1397386              | 2496606             | 95.56         | 92.93   | 96.33   |
| 30         | 1342793              | 2516473             | 1374490              | 2511492             | 1343836              | 2456417             | 93.61         | 94.35   | 94.16   |
| 40         | 1310764              | 2433525             | 1364299              | 2444927             | 1362123              | 2463298             | 94.49         | 96.20   | 95.17   |
| 50         | 1364772              | 2533427             | 1327910              | 2440599             | 1341635              | 2468061             | 94.51         | 93.80   | 93.56   |
| 60         | 1329779              | 2421028             | 1303521              | 2372689             | 1356927              | 2508601             | 96.36         | 94.72   | 93.10   |

Table 2: Peak areas and % remaining values

**Calculation:**

From the peak area, Calculate the following

$$\text{Peak area ratio} = \frac{\text{Peak area of test compound (RJ-02-71)}}{\text{Peak area of internal standard (Verapamil)}}$$

$$\% \text{ remaining at time T} = \frac{\text{Peak area ratio at particular time T}}{\text{Peak area ratio at zero time point}} * 100$$

(T = 0, 10, 20,30,40,50 and 60)

## DATA ANALYSIS:

### Day 1

Linear regression analysis:

Slope:  $-0.0009131 \pm 0.0002255$

At X= 60, Y =  $4.525 \pm 0.008131$

$R^2 = 0.4632$

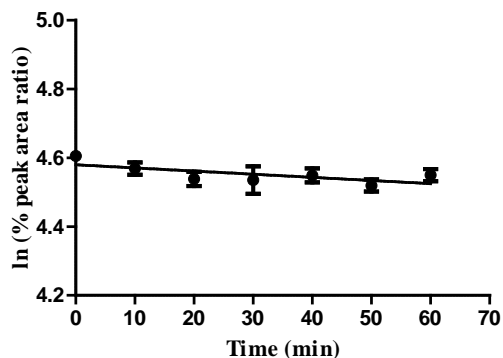

### Day 2

Linear regression analysis:

Slope:  $-0.0008369 \pm 0.0001796$

At X = 60, Y =  $4.537 \pm 0.006474$

$R^2 = 0.5334$

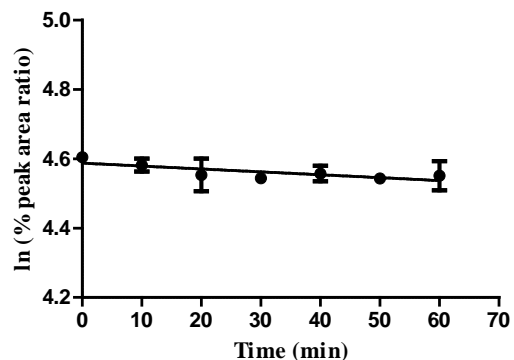

Metabolic Parameters:

Half-life:  $759 \pm 187.4$  min

$V_d$ :  $100 \mu\text{L}/\text{mg}$

Intrinsic clearance:  $0.09131 \mu\text{L}/\text{min}/\text{mg}$

Metabolic Rate:  $1.8262 \text{ nmol}/\text{min}/\text{mg}$

% remaining at 60 min:  $92.29 \pm 0.16 \%$

Metabolic Parameters:

Half-life:  $828.05 \pm 177.7$  min

$V_d$ :  $100 \mu\text{L}/\text{mg}$

Intrinsic clearance:  $0.08369 \mu\text{L}/\text{min}/\text{mg}$

Metabolic Rate:  $1.6738 \text{ nmol}/\text{min}/\text{mg}$

% remaining at 60 min:  $93.41 \pm 0.13 \%$

Note: The peak area ratios and natural log values are calculated using Microsoft excel 2010 and linear regression analysis is calculated using GraphPad prism.

# Mouse Liver Microsomal Assay

Principal Investigator: Dr. Alexander Arnold

Operator: Revathi Kodali

Test Compound: **13a**

Concentration: 10  $\mu$ M

Date: 04-04-2016

Facility: Milwaukee Institute for Drug Discovery

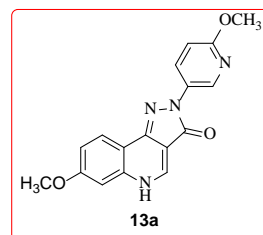

## Assay Protocol

Each evaluation included six independent assays carried out three at a time, on two different days

1. Preparation of solutions:
  - a. 1 mM test compound in DMSO.
  - b. 2  $\mu$ M Verapamil in ice cold Acetonitrile (ISTD).
2. For a total volume of Microsomal Assay Mixture (MAM) 390  $\mu$ L, sufficient for seven time points, combine the following
  - a. 282  $\mu$ L of 18.2 m $\Omega$  of water.
  - b. 80  $\mu$ L of 0.5 M potassium phosphate buffer (pH 7.4)
  - c. 20  $\mu$ L of NADPH A. (Corning life sciences, Cat # 451220)
  - d. 4  $\mu$ L of NADPH B. (Corning life sciences, Cat # 451200)
  - e. 4  $\mu$ L of test compound.
3. Sonicate MAM for 5 min and meanwhile thaw microsomes (20 mg/mL) (Life technologies, Cat # MSMC-PL) on ice.
4. Aliquot 100  $\mu$ L of ice cold ISTD into seven separate 1.5 mL conical vials and label them the time points for 0, 10, 20, 30, 40, 50, and 60 min.
5. Arrange the timer. Microsomes (Final concentration of 0.5 mg/mL) should be added to all time points except the zero time point.
6. Add 50  $\mu$ L of the MAM solution to the conical vial labelled as zero time point. Place the remaining MAM solution in the incubator (37  $^{\circ}$ C) for 5 min and initiate the reaction with addition of microsomes (8.8  $\mu$ L) and record the time.
7. At the end of each time interval remove 50  $\mu$ L and add to 100  $\mu$ L ISTD in conical vial, sonicate for 10 sec and spin down at 10,000 rpm for 5 minutes.
8. Take 100  $\mu$ L of supernatant and transfer to Spin-X HPLC filter tubes (Corning Incorporated, Cat # 8169) and centrifuge at 13,000 rpm for 5 minutes and take 5  $\mu$ L from this solution and dilute in 495  $\mu$ L of LCMS grade methanol (Fischer scientific, CAS # 67-56-1) in a 2mL glass auto sampler vial (Microsolv, Cat # 95025-WCV)
9. The samples are analyzed by LCMS-8040. (Shimadzu)

**Data:**

Day 1:

| Time (min) | Assay 1              |                     | Assay 2              |                     | Assay 3              |                     | % remaining |         |         |
|------------|----------------------|---------------------|----------------------|---------------------|----------------------|---------------------|-------------|---------|---------|
|            | DK-II-13-1 Peak area | Verapamil Peak area | DK-II-13-1 Peak area | Verapamil Peak area | DK-II-13-1 Peak area | Verapamil Peak area | Assay 1     | Assay 2 | Assay 3 |
| 0          | 1304666              | 2507698             | 1412769              | 2632218             | 1438349              | 2617074             | 100.05      | 99.94   | 99.92   |
| 10         | 1342708              | 2677526             | 1390974              | 2638315             | 1388751              | 2572011             | 96.43       | 98.17   | 98.17   |
| 20         | 1273565              | 2705299             | 1352636              | 2882276             | 1344844              | 2631217             | 90.53       | 87.39   | 92.92   |
| 30         | 1164418              | 2621865             | 1218984              | 2675396             | 1302788              | 2728394             | 85.40       | 84.84   | 86.81   |
| 40         | 1152356              | 2747913             | 1225500              | 2827323             | 1155798              | 2510036             | 80.64       | 80.71   | 83.72   |
| 50         | 1097786              | 2651478             | 1185584              | 2809151             | 1084204              | 2519895             | 79.62       | 78.59   | 78.22   |
| 60         | 1059723              | 2683246             | 1109773              | 2833889             | 1065161              | 2636280             | 75.95       | 72.92   | 73.46   |

Table 1: Peak areas and % remaining values

Day 2:

| Time (min) | Assay 1              |                     | Assay 2              |                     | Assay 3              |                     | (% remaining) |         |         |
|------------|----------------------|---------------------|----------------------|---------------------|----------------------|---------------------|---------------|---------|---------|
|            | DK-II-13-1 Peak area | Verapamil Peak area | DK-II-13-1 Peak area | Verapamil Peak area | DK-II-13-1 Peak area | Verapamil Peak area | Assay 1       | Assay 2 | Assay 3 |
| 0          | 1482791              | 2532034             | 1435822              | 2495303             | 1398346              | 2494973             | 99.934        | 100.07  | 100.08  |
| 10         | 1373230              | 2426501             | 1400615              | 2559018             | 1403527              | 2586061             | 96.575        | 95.18   | 96.91   |
| 20         | 1381544              | 2561581             | 1262111              | 2419773             | 1308674              | 2460499             | 92.036        | 90.71   | 94.97   |
| 30         | 1298371              | 2492182             | 1240184              | 2564013             | 1240839              | 2497136             | 88.904        | 84.12   | 88.73   |
| 40         | 1211580              | 2528779             | 1264080              | 2641303             | 1194202              | 2504773             | 81.761        | 83.23   | 85.13   |
| 50         | 1148195              | 2487107             | 1206014              | 2716275             | 1145296              | 2498066             | 78.781        | 77.21   | 81.87   |
| 60         | 1107205              | 2511839             | 1146511              | 2698823             | 1051518              | 2487612             | 75.221        | 73.88   | 75.48   |

Table 2: Peak areas and % remaining values

**Calculation:**

From the peak area, Calculate the following

$$\text{Peak area ratio} = \frac{\text{Peak area of test compound (DK-II-13-1)}}{\text{Peak area of internal standard (Verapamil)}}$$

$$\% \text{ remaining at time T} = \frac{\text{Peak area ratio at particular time T}}{\text{Peak area ratio at zero time point}} * 100$$

(T = 0, 10, 20,30,40,50 and 60)

## DATA ANALYSIS:

### Day 1

Linear regression analysis:

Slope:  $-0.005095 \pm 0.0002029$

At X= 60, Y =  $4.306 \pm 0.007317$

$R^2 = 0.9707$

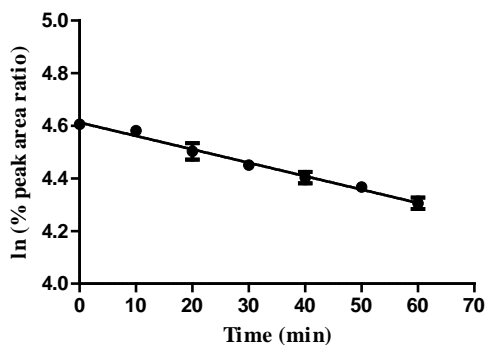

Metabolic Parameters:

Half-life:  $136.05 \pm 5.41$  min

$V_d$ : 100  $\mu\text{L}/\text{mg}$

Intrinsic clearance: 0.5095  $\mu\text{L}/\text{min}/\text{mg}$

Metabolic Rate: 10.19 nmol/min/mg

% remaining at 60 min:  $74.14 \pm 0.12$  %

Note: The peak area ratios and natural log values are calculated using Microsoft excel 2010 and linear regression analysis is calculated using GraphPad prism.

### Day 2

Linear regression analysis:

Slope:  $-0.004868 \pm 0.0002081$

At X = 60, Y =  $4.323 \pm 0.007503$

$R^2 = 0.9664$

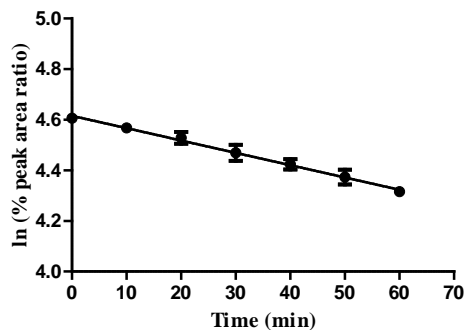

Metabolic Parameters:

Half-life:  $142.35 \pm 6.08$  min

$V_d$ : 100  $\mu\text{L}/\text{mg}$

Intrinsic clearance: 0.4868  $\mu\text{L}/\text{min}/\text{mg}$

Metabolic Rate: 9.736 nmol/min/mg

% remaining at 60 min:  $75.4 \pm 0.13$  %

# Human Liver Microsomal Assay

Principal Investigator: Dr. Alexander Arnold

Operator: Revathi Kodali

Test Compound: **13b**

Concentration: 10  $\mu$ M

Date: 05-26-2016

Facility: Milwaukee Institute for Drug Discovery

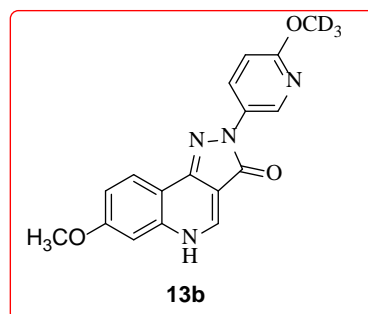

## Assay Protocol

Each evaluation included six independent assays carried out three at a time, on two different days

1. Preparation of solutions:
  - a. 1 mM test compound in DMSO.
  - b. 1  $\mu$ M 4,5 Di Phenyl Imidazole in ice cold Acetonitrile (ISTD).
2. For a total volume of Microsomal Assay Mixture (MAM) 390  $\mu$ L, sufficient for seven time points, combine the following
  - a. 282  $\mu$ L of 18.2 m $\Omega$  of water.
  - b. 80  $\mu$ L of 0.5 M potassium phosphate buffer (p<sup>H</sup> 7.4)
  - c. 20  $\mu$ L of NADPH A. (Corning life sciences, Cat # 451220)
  - d. 4  $\mu$ L of NADPH B. (Corning life sciences, Cat # 451200)
  - e. 4  $\mu$ L of test compound.
3. Sonicate MAM for 5 min and meanwhile thaw microsomes (20 mg/mL) (BD Gentest, Cat # 452156) on ice.
4. Aliquot 100  $\mu$ L of ice cold ISTD into seven separate 1.5 mL conical vials and label them the time points for 0, 10, 20, 30, 40, 50, and 60 min.
5. Arrange the timer. Microsomes (Final concentration of 0.5 mg/mL) should be added to all time points except the zero time point.
6. Add 50  $\mu$ L of the MAM solution to the conical vial labelled as zero time point. Place the remaining MAM solution in the incubator (37  $^{\circ}$ C) for 5 min and initiate the reaction with addition of microsomes (8.8  $\mu$ L) and record the time.
7. At the end of each time interval remove 50  $\mu$ L and add to 100  $\mu$ L ISTD in conical vial, sonicate for 10 sec and spin down at 10,000 rpm for 5 minutes.
8. Take 100  $\mu$ L of supernatant and transfer to Spin-X HPLC filter tubes (Corning Incorporated, Cat # 8169) and centrifuge at 13,000 rpm for 5 minutes and take 5  $\mu$ L from this solution and dilute in 495  $\mu$ L of LCMS grade methanol (Fischer scientific, CAS # 67-56-1) in an 2mL glass auto sampler vial (Microsolv, Cat # 95025-WCV)
9. The samples are analyzed by LCMS-8040. (Shimadzu)

**Data:**

Day 1:

| Time (min) | Assay 1              |                | Assay 2              |                | Assay 3              |                | % remaining |         |         |
|------------|----------------------|----------------|----------------------|----------------|----------------------|----------------|-------------|---------|---------|
|            | DK-II-60-1 Peak area | ISTD Peak area | DK-II-60-1 Peak area | ISTD Peak area | DK-II-60-1 Peak area | ISTD Peak area | Assay 1     | Assay 2 | Assay 3 |
| 0          | 1756284              | 244343         | 1782966              | 254410         | 1795237              | 251121         | 99.99       | 98.87   | 99.99   |
| 10         | 1711624              | 243619         | 1744921              | 249823         | 1715529              | 246573         | 97.74       | 98.54   | 97.32   |
| 20         | 1649870              | 242568         | 1670054              | 246155         | 1650907              | 240772         | 94.62       | 95.71   | 95.91   |
| 30         | 1808744              | 268236         | 1658112              | 243636         | 1501247              | 221933         | 93.81       | 96.01   | 94.62   |
| 40         | 1774043              | 267372         | 1604211              | 236708         | 1582982              | 236575         | 92.30       | 95.61   | 93.59   |
| 50         | 1825221              | 271861         | 1605309              | 243519         | 1551608              | 232314         | 93.40       | 93.00   | 93.42   |
| 60         | 1875923              | 276783         | 1655851              | 247573         | 1565995              | 231980         | 94.29       | 94.36   | 94.42   |

Table 1: Peak areas and % remaining values

Day 2:

| Time (min) | Assay 1              |                | Assay 2              |                | Assay 3              |                | (% remaining) |         |         |
|------------|----------------------|----------------|----------------------|----------------|----------------------|----------------|---------------|---------|---------|
|            | DK-II-60-1 Peak area | ISTD Peak area | DK-II-60-1 Peak area | ISTD Peak area | DK-II-60-1 Peak area | ISTD Peak area | Assay 1       | Assay 2 | Assay 3 |
| 0          | 1739396              | 244473         | 1856188              | 260736         | 1851128              | 259070         | 99.99         | 100.00  | 100.00  |
| 10         | 1652649              | 235465         | 1752613              | 246751         | 1827173              | 261334         | 98.64         | 99.77   | 97.85   |
| 20         | 1607764              | 234543         | 1687805              | 248930         | 1731129              | 253844         | 96.34         | 95.24   | 95.44   |
| 30         | 1587724              | 240500         | 1630521              | 245489         | 1674483              | 247539         | 92.78         | 93.29   | 94.67   |
| 40         | 1588819              | 236967         | 1704883              | 257676         | 1624422              | 244069         | 94.23         | 92.94   | 93.15   |
| 50         | 1510170              | 221788         | 1619423              | 242663         | 1630685              | 248648         | 95.70         | 93.74   | 91.78   |
| 60         | 1487839              | 224359         | 1686917              | 247210         | 1562091              | 233734         | 93.20         | 95.85   | 93.53   |

Table 2: Peak areas and % remaining values

**Calculation:**

From the peak area, Calculate the following

$$\text{Peak area ratio} = \frac{\text{Peak area of test compound (DK-II-60-1)}}{\text{Peak area of internal standard (ISTD)}}$$

$$\% \text{ remaining at time T} = \frac{\text{Peak area ratio at particular time T}}{\text{Peak area ratio at zero time point}} * 100$$

(T = 0, 10, 20,30,40,50 and 60)

## DATA ANALYSIS:

### Day 1

Linear regression analysis:

Slope:  $-0.0009821 \pm 0.0001453$

At X= 60, Y =  $4.530 \pm 0.005238$

$R^2 = 0.7063$

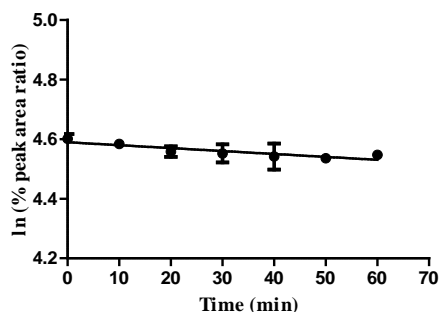

### Day 2

Linear regression analysis:

Slope:  $-0.0001098 \pm 0.0001911$

At X = 60, Y =  $4.527 \pm 0.006892$

$R^2 = 0.6344$

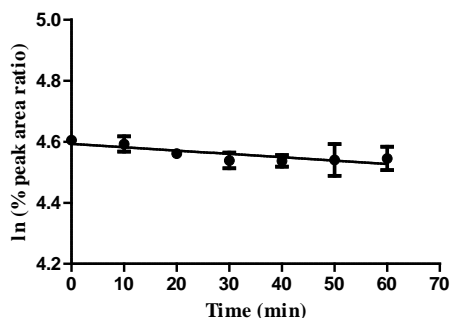

Metabolic Parameters:

Half-life:  $554 \pm 81.9$  min

$V_d$ :  $100 \mu\text{L}/\text{mg}$

Intrinsic clearance:  $0.1251 \mu\text{L}/\text{min}/\text{mg}$

Metabolic Rate:  $2.502 \text{ nmol}/\text{min}/\text{mg}$

% remaining at 60 min:  $92.75 \pm 0.10$  %

Metabolic Parameters:

Half-life:  $631.14 \pm 110$  min

$V_d$ :  $100 \mu\text{L}/\text{mg}$

Intrinsic clearance:  $0.1098 \mu\text{L}/\text{min}/\text{mg}$

Metabolic Rate:  $2.196 \text{ nmol}/\text{min}/\text{mg}$

% remaining at 60 min:  $92.4 \pm 0.14$  %

Note: The peak area ratios and natural log values are calculated using Microsoft excel 2010 and linear regression analysis is calculated using GraphPad prism.



# Mouse Liver Microsomal Assay

Principal Investigator: Dr. Alexander Arnold

Operator: Revathi Kodali

Test Compound: **13b**

Concentration: 10  $\mu$ M

Date: 05-26-2016

Facility: Milwaukee Institute for Drug Discovery

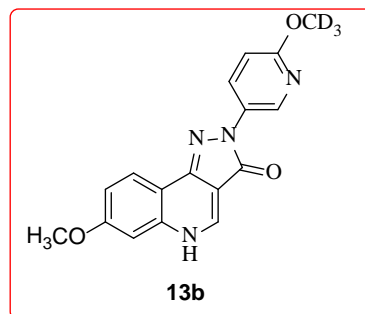

## Assay Protocol

Each evaluation included six independent assays carried out three at a time, on two different days

1. Preparation of solutions:
  - a. 1 mM test compound in DMSO.
  - b. 1  $\mu$ M 4, 5 Di Phenyl Imidazole in ice cold Acetonitrile (ISTD).
2. For a total volume of Microsomal Assay Mixture (MAM) 390  $\mu$ L, sufficient for seven time points, combine the following
  - a. 282  $\mu$ L of 18.2 m $\Omega$  of water.
  - b. 80  $\mu$ L of 0.5 M potassium phosphate buffer (pH 7.4)
  - c. 20  $\mu$ L of NADPH A. (Corning life sciences, Cat # 451220)
  - d. 4  $\mu$ L of NADPH B. (Corning life sciences, Cat # 451200)
  - e. 4  $\mu$ L of test compound.
3. Sonicate MAM for 5 min and meanwhile thaw microsomes (20 mg/mL) (Life technologies, Cat # MSMC-PL) on ice.
4. Aliquot 100  $\mu$ L of ice cold ISTD into seven separate 1.5 mL conical vials and label them the time points for 0, 10, 20, 30, 40, 50, and 60 min.
5. Arrange the timer. Microsomes (Final concentration of 0.5 mg/mL) should be added to all time points except the zero time point.
6. Add 50  $\mu$ L of the MAM solution to the conical vial labelled as zero time point. Place the remaining MAM solution in the incubator (37 °C) for 5 min and initiate the reaction with addition of microsomes (8.8  $\mu$ L) and record the time.
7. At the end of each time interval remove 50  $\mu$ L and add to 100  $\mu$ L ISTD in conical vial, sonicate for 10 sec and spin down at 10,000 rpm for 5 minutes.
8. Take 100  $\mu$ L of supernatant and transfer to Spin-X HPLC filter tubes (Corning Incorporated, Cat # 8169) and centrifuge at 13,000 rpm for 5 minutes and take 5  $\mu$ L from this solution and dilute in 495  $\mu$ L of LCMS grade methanol (Fischer scientific, CAS # 67-56-1) in a 2mL glass auto sampler vial (Microsolv, Cat # 95025-WCV)
9. The samples are analyzed by LCMS-8040. (Shimadzu)

**Data:**

Day 1:

| Time (min) | Assay 1              |                | Assay 2              |                | Assay 3              |                | % remaining |         |         |
|------------|----------------------|----------------|----------------------|----------------|----------------------|----------------|-------------|---------|---------|
|            | DK-II-60-1 Peak area | ISTD Peak area | DK-II-60-1 Peak area | ISTD Peak area | DK-II-60-1 Peak area | ISTD Peak area | Assay 1     | Assay 2 | Assay 3 |
| 0          | 1980897              | 286787         | 1989357              | 292666         | 2031686              | 294323         | 100.00      | 100.00  | 99.99   |
| 10         | 1928833              | 281364         | 1980914              | 301476         | 1981596              | 297128         | 99.25       | 96.67   | 96.61   |
| 20         | 1702400              | 252372         | 1803535              | 270907         | 2053633              | 308914         | 97.66       | 97.94   | 96.30   |
| 30         | 1593574              | 248948         | 1653173              | 256710         | 1946765              | 302009         | 92.67       | 94.74   | 93.38   |
| 40         | 1696744              | 257276         | 1647899              | 254711         | 1890234              | 290171         | 95.48       | 95.18   | 94.36   |
| 50         | 1666664              | 254754         | 1607831              | 256199         | 1846752              | 285585         | 94.71       | 92.33   | 93.67   |
| 60         | 1649310              | 253220         | 1848227              | 291005         | 1873190              | 292113         | 94.30       | 93.44   | 92.89   |

Table 1: Peak areas and % remaining values

Day 2:

| Time (min) | Assay 1              |                | Assay 2              |                | Assay 3              |                | (% remaining) |         |         |
|------------|----------------------|----------------|----------------------|----------------|----------------------|----------------|---------------|---------|---------|
|            | DK-II-60-1 Peak area | ISTD Peak area | DK-II-60-1 Peak area | ISTD Peak area | DK-II-60-1 Peak area | ISTD Peak area | Assay 1       | Assay 2 | Assay 3 |
| 0          | 2058936              | 337209         | 1947564              | 316544         | 2038726              | 335006         | 99.99         | 99.99   | 99.99   |
| 10         | 2096283              | 349902         | 1911365              | 323345         | 2002739              | 338162         | 98.11         | 96.07   | 97.31   |
| 20         | 2000575              | 343357         | 1982961              | 342398         | 1980098              | 347159         | 95.42         | 94.12   | 93.71   |
| 30         | 2047619              | 351527         | 1916376              | 339357         | 2019605              | 348138         | 95.39         | 91.77   | 95.32   |
| 40         | 1898193              | 330966         | 1938881              | 340193         | 1954188              | 344708         | 93.92         | 92.62   | 93.15   |
| 50         | 1784526              | 304689         | 1915426              | 337783         | 2096104              | 373344         | 95.92         | 92.16   | 92.25   |
| 60         | 1791485              | 318892         | 1994882              | 341903         | 2007358              | 355040         | 92.00         | 94.82   | 92.90   |

Table 2: Peak areas and % remaining values

**Calculation:**

From the peak area, Calculate the following

$$\text{Peak area ratio} = \frac{\text{Peak area of test compound (DK-II-60-1)}}{\text{Peak area of internal standard (ISTD)}}$$

$$\% \text{ remaining at time T} = \frac{\text{Peak area ratio at particular time T}}{\text{Peak area ratio at zero time point}} * 100$$

(T = 0, 10, 20,30,40,50 and 60)

## DATA ANALYSIS:

### Day 1

Linear regression analysis:

Slope:  $-0.001099 \pm 0.0001523$

At X= 60, Y =  $4.529 \pm 0.005492$

$R^2 = 0.7325$

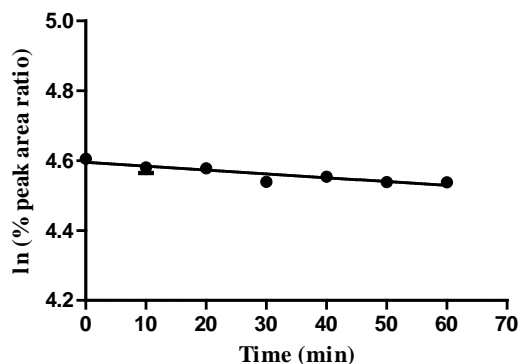

Metabolic Parameters:

Half-life:  $630.57 \pm 87.38$  min

$V_d$ : 100  $\mu\text{L}/\text{mg}$

Intrinsic clearance: 0.1099  $\mu\text{L}/\text{min}/\text{mg}$

Metabolic Rate: 2.198 nmol/min/mg

% remaining at 60 min:  $92.66 \pm 0.11$  %

### Day 2

Linear regression analysis:

Slope:  $-0.0001067 \pm 0.0001939$

At X = 60, Y =  $4.523 \pm 0.006992$

$R^2 = 0.6143$

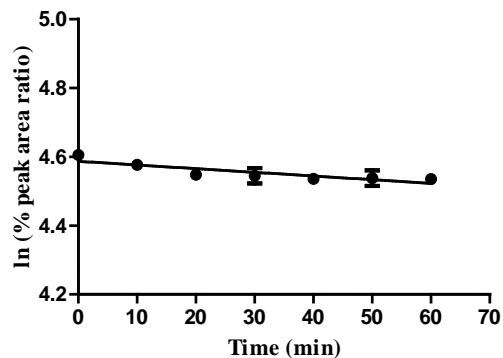

Metabolic Parameters:

Half-life:  $649.48 \pm 118$  min

$V_d$ : 100  $\mu\text{L}/\text{mg}$

Intrinsic clearance: 0.1067  $\mu\text{L}/\text{min}/\text{mg}$

Metabolic Rate: 2.134 nmol/min/mg

% remaining at 60 min:  $92.11 \pm 0.14$  %

Note: The peak area ratios and natural log values are calculated using Microsoft excel 2010 and linear regression analysis is calculated using GraphPad prism.

# Human Liver Microsomal Assay

Principal Investigator: Dr. Alexander Arnold

Operator: Revathi Kodali

Test Compound: **13c**

Concentration: 10  $\mu$ M

Date: 02-24-2016

Facility: Milwaukee Institute for Drug Discovery

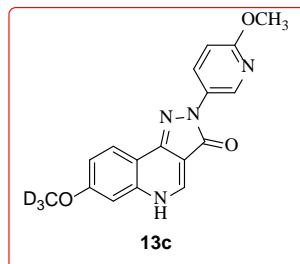

## Assay Protocol

Each evaluation included six independent assays carried out three at a time, on two different days

1. Preparation of solutions:
  - a. 1 mM test compound in DMSO.
  - b. 1  $\mu$ M Verapamil in Acetonitrile (ACN) as internal standard (store on ice).
2. For a total volume of Microsomal Assay Mixture (MAM) 390  $\mu$ L, sufficient for seven time points, combine the following
  - a. 282  $\mu$ L of 18.2 m $\Omega$  of water.
  - b. 80  $\mu$ L of 0.5 M potassium phosphate buffer (p<sup>H</sup> 7.4)
  - c. 20  $\mu$ L of NADPH A. (Corning life sciences, Cat # 451220)
  - d. 4  $\mu$ L of NADPH B. (Corning life sciences, Cat # 451200)
  - e. 4  $\mu$ L of test compound.
3. Sonicate MAM for 5 min and meanwhile thaw microsomes (20 mg/mL) (BD Gentest, Cat # 452156) on ice.
4. Aliquot 100  $\mu$ L of ice cold ISTD into seven separate 1.5 mL conical vials and label them the time points for 0, 10, 20, 30, 40, 50, and 60 min.
5. Arrange the timer. Microsomes (Final concentration of 0.5 mg/mL) should be added to all time points except the zero time point.
6. Add 50  $\mu$ L of the MAM solution to the conical vial labelled as zero time point. Place the remaining MAM solution in the incubator (37 °C) for 5 min and initiate the reaction with addition of microsomes (8.8  $\mu$ L) and record the time.
7. At the end of each time interval remove 50  $\mu$ L and add to 100  $\mu$ L ISTD in conical vial, sonicate for 10 sec and spin down at 10,000 rpm for 5 minutes.
8. Take 100  $\mu$ L of supernatant and transfer to Spin-X HPLC filter tubes (Corning Incorporated, Cat # 8169) and centrifuge at 13,000 rpm for 5 minutes and take 5  $\mu$ L from this solution and dilute in 495  $\mu$ L of LCMS grade methanol (Fischer scientific, CAS # 67-56-1) in a 2mL glass auto sampler vial (Microsolv, Cat # 95025-WCV)
9. The samples are analyzed by LCMS-8040. (Shimadzu)

**Data:**

Day 1:

| Time (min) | Assay 1             |                     | Assay 2             |                     | Assay 3             |                     | % remaining |         |         |
|------------|---------------------|---------------------|---------------------|---------------------|---------------------|---------------------|-------------|---------|---------|
|            | DK-I-86-1 Peak area | Verapamil Peak area | DK-I-86-1 Peak area | Verapamil Peak area | DK-I-86-1 Peak area | Verapamil Peak area | Assay 1     | Assay 2 | Assay 3 |
| 0          | 792373              | 761693              | 787587              | 762552              | 759063              | 767398              | 100.02      | 99.98   | 100.01  |
| 10         | 775249              | 778963              | 759323              | 778215              | 722382              | 763900              | 95.69       | 94.45   | 95.61   |
| 20         | 747907              | 769408              | 720325              | 751835              | 705108              | 755157              | 93.46       | 92.74   | 94.41   |
| 30         | 752648              | 766232              | 732194              | 737114              | 704567              | 740283              | 94.44       | 96.15   | 96.23   |
| 40         | 745127              | 774917              | 729292              | 745328              | 715307              | 764064              | 92.45       | 94.72   | 94.66   |
| 50         | 748105              | 768076              | 736837              | 751091              | 714739              | 751444              | 93.65       | 94.96   | 96.17   |
| 60         | 742196              | 751303              | 716214              | 761424              | 695197              | 750039              | 94.98       | 91.05   | 93.71   |

Table 1: Peak areas and % remaining values

Day 2:

| Time (min) | Assay 1             |                     | Assay 2             |                     | Assay 3             |                     | (% remaining) |         |         |
|------------|---------------------|---------------------|---------------------|---------------------|---------------------|---------------------|---------------|---------|---------|
|            | DK-I-86-1 Peak area | Verapamil Peak area | DK-I-86-1 Peak area | Verapamil Peak area | DK-I-86-1 Peak area | Verapamil Peak area | Assay 1       | Assay 2 | Assay 3 |
| 0          | 792080              | 771654              | 755622              | 767152              | 750685              | 764993              | 100.04        | 99.99   | 100.03  |
| 10         | 763307              | 762869              | 718899              | 751779              | 725054              | 769289              | 97.52         | 97.08   | 96.07   |
| 20         | 739985              | 759373              | 712962              | 769369              | 684187              | 740762              | 94.97         | 94.08   | 94.15   |
| 30         | 732020              | 765124              | 701439              | 754561              | 700784              | 761722              | 93.24         | 94.37   | 93.78   |
| 40         | 731777              | 774078              | 696706              | 768514              | 704575              | 751634              | 92.14         | 92.03   | 95.55   |
| 50         | 713226              | 743504              | 690888              | 750265              | 694976              | 761536              | 93.49         | 93.48   | 93.02   |
| 60         | 713143              | 761196              | 697143              | 765448              | 701108              | 768530              | 91.31         | 92.46   | 92.99   |

Table 2: Peak areas and % remaining values

**Calculation:**

From the peak area, Calculate the following

$$\text{Peak area ratio} = \frac{\text{Peak area of test compound (DK-I-86-1)}}{\text{Peak area of internal standard (Verapamil)}}$$

$$\% \text{ remaining at time T} = \frac{\text{Peak area ratio at particular time T}}{\text{Peak area ratio at zero time point}} * 100$$

(T = 0, 10, 20,30,40,50 and 60)

## DATA ANALYSIS:

### Day 1

Linear regression analysis:

Slope:  $-0.0007571 \pm 0.0002152$

At X= 60, Y =  $4.533 \pm 0.007758$

$R^2 = 0.3946$

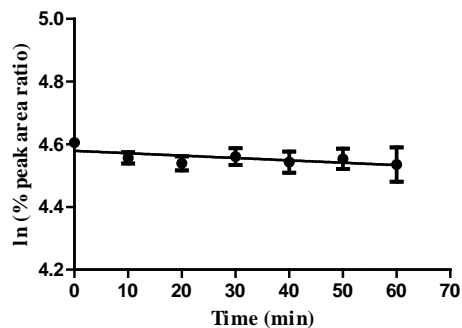

### Day 2

Linear regression analysis:

Slope:  $-0.001176 \pm 0.0001580$

At X = 60, Y =  $4.517 \pm 0.005695$

$R^2 = 0.7448$

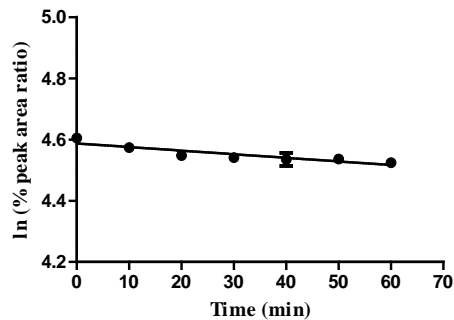

Metabolic Parameters:

Half-life:  $915.33 \pm 260$  min

$V_d$ : 100  $\mu$ L/mg

Intrinsic clearance: 0.07571  $\mu$ L/min/mg

Metabolic Rate: 1.5142 nmol/min/mg

% remaining at 60 min:  $93.03 \pm 0.16$  %

Metabolic Parameters:

Half-life:  $589.28 \pm 261.93$  min

$V_d$ : 100  $\mu$ L/mg

Intrinsic clearance: 0.1176  $\mu$ L/min/mg

Metabolic Rate: 2.352 nmol/min/mg

% remaining at 60 min:  $91.56 \pm 0.11$  %

Note: The peak area ratios and natural log values are calculated using Microsoft excel 2010 and linear regression analysis is calculated using GraphPad prism.

# Mouse Liver Microsomal Assay

Principal Investigator: Dr. Alexander Arnold

Operator: Revathi Kodali

Test Compound: **13c**

Concentration: 10  $\mu\text{M}$

Date: 02-24-2016

Facility: Milwaukee Institute for Drug Discovery

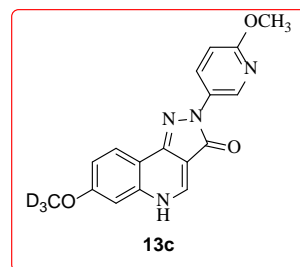

## Assay Protocol

Each evaluation included six independent assays carried out three at a time, on two different days

1. Preparation of solutions:
  - a. 1 mM test compound in DMSO.
  - b. 1  $\mu\text{M}$  Verapamil in Acetonitrile (ACN) as internal standard (store on ice).
2. For a total volume of Microsomal Assay Mixture (MAM) 390  $\mu\text{L}$ , sufficient for seven time points, combine the following
  - a. 282  $\mu\text{L}$  of 18.2 m $\Omega$  of water.
  - b. 80  $\mu\text{L}$  of 0.5 M potassium phosphate buffer (pH 7.4)
  - c. 20  $\mu\text{L}$  of NADPH A. (Corning life sciences, Cat # 451220)
  - d. 4  $\mu\text{L}$  of NADPH B. (Corning life sciences, Cat # 451200)
  - e. 4  $\mu\text{L}$  of test compound.
3. Sonicate MAM for 5 min and meanwhile thaw microsomes (20 mg/mL) (Life technologies, Cat # 452156) on ice.
4. Aliquot 100  $\mu\text{L}$  of ice cold ISTD into seven separate 1.5 mL conical vials and label them the time points for 0, 10, 20, 30, 40, 50, and 60 min.
5. Arrange the timer. Microsomes (Final concentration of 0.5 mg/mL) should be added to all time points except the zero time point.
6. Add 50  $\mu\text{L}$  of the MAM solution to the conical vial labelled as zero time point. Place the remaining MAM solution in the incubator (37  $^{\circ}\text{C}$ ) for 5 min and initiate the reaction with addition of microsomes (8.8  $\mu\text{L}$ ) and record the time.
7. At the end of each time interval remove 50  $\mu\text{L}$  and add to 100  $\mu\text{L}$  ISTD in conical vial, sonicate for 10 sec and spin down at 10,000 rpm for 5 minutes.
8. Take 100  $\mu\text{L}$  of supernatant and transfer to Spin-X HPLC filter tubes (Corning Incorporated, Cat # 8169) and centrifuge at 13,000 rpm for 5 minutes and take 5  $\mu\text{L}$  from this solution and dilute in 495  $\mu\text{L}$  of LCMS grade methanol (Fischer scientific, CAS # 67-56-1) in a 2mL glass auto sampler vial (Microsolv, Cat # 95025-WCV)
9. The samples are analyzed by LCMS-8040. (Shimadzu)

**Data:**

Day 1:

| Time (min) | Assay 1             |                     | Assay 2             |                     | Assay 3             |                     | % remaining |         |         |
|------------|---------------------|---------------------|---------------------|---------------------|---------------------|---------------------|-------------|---------|---------|
|            | DK-I-86-1 Peak area | Verapamil Peak area | DK-I-86-1 Peak area | Verapamil Peak area | DK-I-86-1 Peak area | Verapamil Peak area | Assay 1     | Assay 2 | Assay 3 |
| 0          | 748286              | 763242              | 722465              | 767929              | 769758              | 742901              | 100.04      | 99.97   | 100.01  |
| 10         | 713998              | 749342              | 706222              | 755366              | 756894              | 758618              | 97.22       | 99.35   | 96.30   |
| 20         | 690434              | 750832              | 686823              | 767153              | 764830              | 773294              | 93.83       | 95.14   | 95.46   |
| 30         | 702462              | 771060              | 663671              | 745862              | 736979              | 755844              | 92.96       | 94.55   | 94.11   |
| 40         | 694160              | 769174              | 670892              | 771278              | 738418              | 765370              | 92.08       | 92.43   | 93.12   |
| 50         | 688116              | 768297              | 669515              | 747483              | 701337              | 740371              | 91.39       | 95.18   | 91.43   |
| 60         | 699208              | 755159              | 658858              | 761861              | 731836              | 752534              | 94.48       | 91.90   | 93.87   |

Table 1: Peak areas and % remaining values

Day 2:

| Time (min) | Assay 1             |                     | Assay 2             |                     | Assay 3             |                     | (% remaining) |         |         |
|------------|---------------------|---------------------|---------------------|---------------------|---------------------|---------------------|---------------|---------|---------|
|            | DK-I-86-1 Peak area | Verapamil Peak area | DK-I-86-1 Peak area | Verapamil Peak area | DK-I-86-1 Peak area | Verapamil Peak area | Assay 1       | Assay 2 | Assay 3 |
| 0          | 703150              | 745961              | 719185              | 771365              | 719185              | 771365              | 99.95         | 100.03  | 100.04  |
| 10         | 685315              | 755803              | 699396              | 769657              | 699396              | 769657              | 96.15         | 97.50   | 97.81   |
| 20         | 668828              | 748912              | 653994              | 753512              | 653994              | 753512              | 94.70         | 93.12   | 95.01   |
| 30         | 672903              | 766432              | 670496              | 743115              | 670496              | 743115              | 93.10         | 96.81   | 93.92   |
| 40         | 675455              | 755264              | 664193              | 756441              | 664193              | 756441              | 94.83         | 94.21   | 92.71   |
| 50         | 671149              | 779998              | 656754              | 750123              | 656754              | 750123              | 91.24         | 93.94   | 92.52   |
| 60         | 652813              | 760945              | 643312              | 766695              | 643312              | 766695              | 90.97         | 90.02   | 93.06   |

Table 2: Peak areas and % remaining values

**Calculation:**

From the peak area, Calculate the following

$$\text{Peak area ratio} = \frac{\text{Peak area of test compound (DK-I-86-1)}}{\text{Peak area of internal standard (Verapamil)}}$$

$$\% \text{ remaining at time T} = \frac{\text{Peak area ratio at particular time T}}{\text{Peak area ratio at zero time point}} * 100$$

(T = 0, 10, 20,30,40,50 and 60)



## DATA ANALYSIS:

### Day 1

Linear regression analysis:

Slope:  $-0.001192 \pm 0.0001908$

At X= 60, Y =  $4.518 \pm 0.006880$

$R^2 = 0.6724$

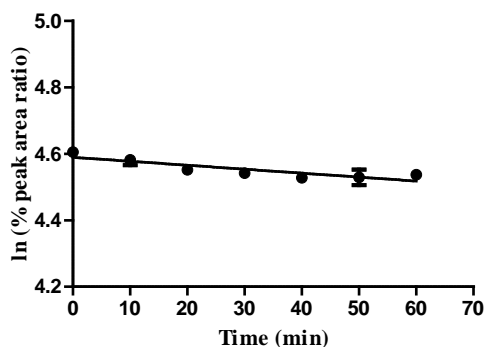

### Day 2

Linear regression analysis:

Slope:  $-0.001333 \pm 0.0001630$

At X = 60, Y =  $4.512 \pm 0.005877$

$R^2 = 0.7789$

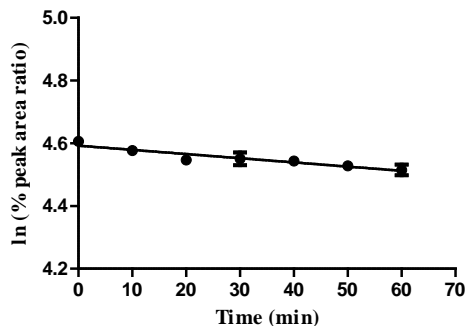

Metabolic Parameters:

Half-life:  $581.37 \pm 93$  min

$V_d$ : 100  $\mu$ L/mg

Intrinsic clearance: 0.1192  $\mu$ L/min/mg

Metabolic Rate: 2.384 nmol/min/mg

% remaining at 60 min:  $91.65 \pm 0.14$  %

Metabolic Parameters:

Half-life:  $519.88 \pm 63.57$  min

$V_d$ : 100  $\mu$ L/mg

Intrinsic clearance: 0.1333  $\mu$ L/min/mg

Metabolic Rate: 2.666 nmol/min/mg

% remaining at 60 min:  $91.10 \pm 0.11$  %

Note: The peak area ratios and natural log values are calculated using Microsoft excel 2010 and linear regression analysis is calculated using GraphPad prism.

# Human Liver Microsomal Assay

Principal Investigator: Dr. Alexander Arnold

Operator: Revathi Kodali

Test Compound: **13d**

Concentration: 10  $\mu$ M

Date: 02-28-2017

Facility: Milwaukee Institute for Drug Discovery

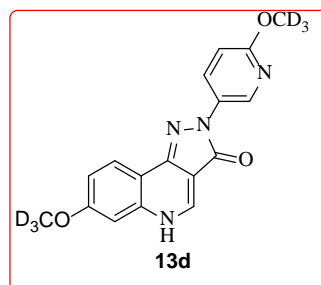

## Assay Protocol

Each evaluation included six independent assays carried out three at a time, on two different days

1. Preparation of solutions:
  - a. 1 mM test compound in DMSO.
  - b. 3  $\mu$ M Verapamil in ice cold Acetonitrile (ISTD).
2. For a total volume of Microsomal Assay Mixture (MAM) 390  $\mu$ L, sufficient for seven time points, combine the following
  - a. 282  $\mu$ L of 18.2 m $\Omega$  of water.
  - b. 80  $\mu$ L of 0.5 M potassium phosphate buffer (p<sup>H</sup> 7.4)
  - c. 20  $\mu$ L of NADPH A. (Corning life sciences, Cat # 451220)
  - d. 4  $\mu$ L of NADPH B. (Corning life sciences, Cat # 451200)
  - e. 4  $\mu$ L of test compound.
3. Sonicate MAM for 5 min and meanwhile thaw microsomes (20 mg/mL) (BD Gentest, Cat # 452156) on ice.
4. Aliquot 100  $\mu$ L of ice cold ISTD into seven separate 1.5 mL conical vials and label them the time points for 0, 10, 20, 30, 40, 50, and 60 min.
5. Arrange the timer. Microsomes (Final concentration of 0.5 mg/mL) should be added to all time points except the zero time point.
6. Add 50  $\mu$ L of the MAM solution to the conical vial labelled as zero time point. Place the remaining MAM solution in the incubator (37  $^{\circ}$ C) for 5 min and initiate the reaction with addition of microsomes (8.8  $\mu$ L) and record the time.
7. At the end of each time interval remove 50  $\mu$ L and add to 100  $\mu$ L ISTD in conical vial, sonicate for 10 sec and spin down at 10,000 rpm for 5 minutes.
8. Take 100  $\mu$ L of supernatant and transfer to Spin-X HPLC filter tubes (Corning Incorporated, Cat # 8169) and centrifuge at 13,000 rpm for 5 minutes and take 5  $\mu$ L from this solution and dilute in 495  $\mu$ L of LCMS grade methanol (Fischer scientific, CAS # 67-56-1) in an 2mL glass auto sampler vial (Microsolv, Cat # 95025-WCV)
9. The samples are analyzed by LCMS-8040. (Shimadzu)

**Data:**

Day 1:

| Time (min) | Assay 1              |                     | Assay 2              |                     | Assay 3              |                     | % remaining |         |         |
|------------|----------------------|---------------------|----------------------|---------------------|----------------------|---------------------|-------------|---------|---------|
|            | DK-III-6-1 Peak area | Verapamil Peak area | DK-III-6-1 Peak area | Verapamil Peak area | DK-III-6-1 Peak area | Verapamil Peak area | Assay 1     | Assay 2 | Assay 3 |
| 0          | 153644               | 364063              | 140809               | 360823              | 147344               | 361083              | 100.00      | 100.06  | 100.01  |
| 10         | 144930               | 355973              | 134322               | 361783              | 140461               | 358982              | 96.47       | 95.19   | 95.90   |
| 20         | 145649               | 357844              | 131921               | 362018              | 135460               | 349781              | 96.45       | 93.43   | 94.91   |
| 30         | 136721               | 362984              | 135283               | 358972              | 133692               | 361193              | 89.25       | 96.63   | 90.72   |
| 40         | 141558               | 359723              | 126286               | 359981              | 131160               | 357892              | 93.25       | 89.95   | 89.82   |
| 50         | 133488               | 348756              | 128461               | 363874              | 136171               | 359671              | 90.70       | 90.52   | 92.79   |
| 60         | 134498               | 358623              | 128686               | 361211              | 136437               | 362084              | 88.87       | 91.34   | 92.35   |

Table 1: Peak areas and % remaining values

Day 2:

| Time (min) | Assay 1              |                     | Assay 2              |                     | Assay 3              |                     | (% remaining) |         |         |
|------------|----------------------|---------------------|----------------------|---------------------|----------------------|---------------------|---------------|---------|---------|
|            | DK-III-6-1 Peak area | Verapamil Peak area | DK-III-6-1 Peak area | Verapamil Peak area | DK-III-6-1 Peak area | Verapamil Peak area | Assay 1       | Assay 2 | Assay 3 |
| 0          | 148525               | 357823              | 147750               | 359789              | 151645               | 358973              | 100.01        | 99.91   | 100.10  |
| 10         | 143805               | 357791              | 140631               | 361882              | 146568               | 360078              | 96.84         | 94.55   | 96.45   |
| 20         | 141879               | 359721              | 133414               | 362874              | 143690               | 358612              | 95.04         | 89.45   | 94.94   |
| 30         | 140050               | 362073              | 138462               | 362991              | 143387               | 362543              | 93.20         | 92.81   | 93.72   |
| 40         | 134914               | 362734              | 133414               | 359834              | 140961               | 361834              | 89.62         | 90.21   | 92.31   |
| 50         | 140699               | 361764              | 140398               | 358976              | 141144               | 362893              | 93.71         | 95.16   | 92.16   |
| 60         | 140461               | 359722              | 136812               | 360823              | 146875               | 361383              | 94.08         | 92.25   | 96.30   |

Table 2: Peak areas and % remaining values

**Calculation:**

From the peak area, Calculate the following

$$\text{Peak area ratio} = \frac{\text{Peak area of test compound (DK-III-6-1)}}{\text{Peak area of internal standard (Verapamil)}}$$

$$\% \text{ remaining at time T} = \frac{\text{Peak area ratio at particular time T}}{\text{Peak area ratio at zero time point}} * 100$$

(T = 0, 10, 20,30,40,50 and 60)

## DATA ANALYSIS:

### Day 1

Linear regression analysis:

Slope:  $-0.001523 \pm 0.0002458$

At X= 60, Y =  $4.494 \pm 0.008864$

$R^2 = 0.6688$

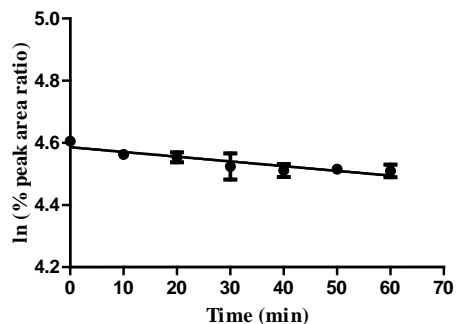

### Day 2

Linear regression analysis:

Slope:  $-0.0008976 \pm 0.0003018$

At X = 60, Y =  $4.520 \pm 0.01088$

$R^2 = 0.3177$

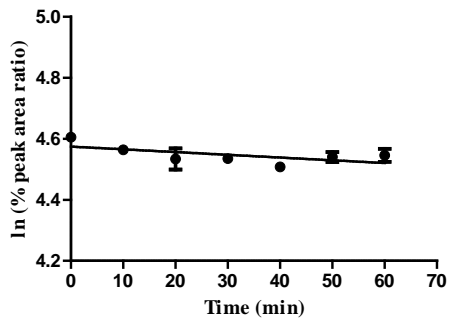

Metabolic Parameters:

Half-life:  $455 \pm 73$  min

$V_d$ : 100  $\mu\text{L}/\text{mg}$

Intrinsic clearance: 0.1523  $\mu\text{L}/\text{min}/\text{mg}$

Metabolic Rate: 3.046  $\text{nmol}/\text{min}/\text{mg}$

% remaining at 60 min:  $89 \pm 0.20$  %

Metabolic Parameters:

Half-life:  $772 \pm 260$  min

$V_d$ : 100  $\mu\text{L}/\text{mg}$

Intrinsic clearance: 0.08976  $\mu\text{L}/\text{min}/\text{mg}$

Metabolic Rate: 1.7952  $\text{nmol}/\text{min}/\text{mg}$

% remaining at 60 min:  $91 \pm 0.6$  %

Note: The peak area ratios and natural log values are calculated using Microsoft excel 2010 and linear regression analysis is calculated using GraphPad prism.

# Mouse Liver Microsomal Assay

Principal Investigator: Dr. Alexander Arnold

Operator: Revathi Kodali

Test Compound: **13d**

Concentration: 10  $\mu$ M

Date: 02-28-2017

Facility: Milwaukee Institute for Drug Discovery

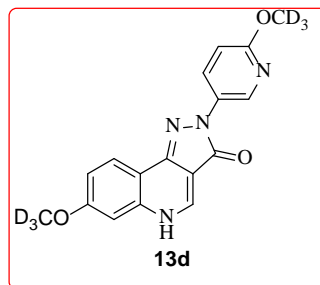

## Assay Protocol

Each evaluation included six independent assays carried out three at a time, on two different days

1. Preparation of solutions:
  - a. 1 mM test compound in DMSO.
  - b. 3  $\mu$ M Verapamil in ice cold Acetonitrile (ISTD).
2. For a total volume of Microsomal Assay Mixture (MAM) 390  $\mu$ L, sufficient for seven time points, combine the following
  - a. 282  $\mu$ L of 18.2 m $\Omega$  of water.
  - b. 80  $\mu$ L of 0.5 M potassium phosphate buffer (p<sup>H</sup> 7.4)
  - c. 20  $\mu$ L of NADPH A. (Corning life sciences, Cat # 451220)
  - d. 4  $\mu$ L of NADPH B. (Corning life sciences, Cat # 451200)
  - e. 4  $\mu$ L of test compound.
3. Sonicate MAM for 5 min and meanwhile thaw microsomes (20 mg/mL) (Life technologies, Cat # MSMC-PL) on ice.
4. Aliquot 100  $\mu$ L of ice cold ISTD into seven separate 1.5 mL conical vials and label them the time points for 0, 10, 20, 30, 40, 50, and 60 min.
5. Arrange the timer. Microsomes (Final concentration of 0.5 mg/mL) should be added to all time points except the zero time point.
6. Add 50  $\mu$ L of the MAM solution to the conical vial labelled as zero time point. Place the remaining MAM solution in the incubator (37  $^{\circ}$ C) for 5 min and initiate the reaction with addition of microsomes (8.8  $\mu$ L) and record the time.
7. At the end of each time interval remove 50  $\mu$ L and add to 100  $\mu$ L ISTD in conical vial, sonicate for 10 sec and spin down at 10,000 rpm for 5 minutes.
8. Take 100  $\mu$ L of supernatant and transfer to Spin-X HPLC filter tubes (Corning Incorporated, Cat # 8169) and centrifuge at 13,000 rpm for 5 minutes and take 5  $\mu$ L from this solution and dilute in 495  $\mu$ L of LCMS grade methanol (Fischer scientific, CAS # 67-56-1) in a 2mL glass auto sampler vial (Microsolv, Cat # 95025-WCV)
9. The samples are analyzed by LCMS-8040. (Shimadzu)

**Data:**

Day 1:

| Time (min) | Assay 1              |                     | Assay 2              |                     | Assay 3              |                     | % remaining |         |         |
|------------|----------------------|---------------------|----------------------|---------------------|----------------------|---------------------|-------------|---------|---------|
|            | DK-III-6-1 Peak area | Verapamil Peak area | DK-III-6-1 Peak area | Verapamil Peak area | DK-III-6-1 Peak area | Verapamil Peak area | Assay 1     | Assay 2 | Assay 3 |
| 0          | 148490               | 360183              | 152920               | 361083              | 148522               | 359971              | 100.06      | 99.88   | 99.90   |
| 10         | 140281               | 359723              | 145884               | 358916              | 140207               | 358672              | 94.65       | 95.86   | 94.65   |
| 20         | 135278               | 354189              | 143711               | 358778              | 136552               | 356153              | 92.70       | 94.47   | 92.83   |
| 30         | 134096               | 339989              | 140660               | 356891              | 143925               | 371083              | 95.73       | 92.95   | 93.91   |
| 40         | 134133               | 360821              | 137701               | 360073              | 140962               | 360123              | 90.22       | 90.19   | 94.77   |
| 50         | 139839               | 358872              | 145090               | 361792              | 144050               | 359723              | 94.57       | 94.58   | 96.96   |
| 60         | 134525               | 357821              | 139905               | 360513              | 140084               | 356278              | 91.25       | 91.52   | 95.20   |

Table 1: Peak areas and % remaining values

Day 2:

| Time (min) | Assay 1              |                     | Assay 2              |                     | Assay 3              |                     | (% remaining) |         |         |
|------------|----------------------|---------------------|----------------------|---------------------|----------------------|---------------------|---------------|---------|---------|
|            | DK-III-6-1 Peak area | Verapamil Peak area | DK-III-6-1 Peak area | Verapamil Peak area | DK-III-6-1 Peak area | Verapamil Peak area | Assay 1       | Assay 2 | Assay 3 |
| 0          | 150286               | 358974              | 145675               | 361284              | 148487               | 360083              | 99.91         | 100.05  | 100.09  |
| 10         | 143342               | 360173              | 141379               | 360083              | 142375               | 357982              | 94.98         | 97.42   | 96.53   |
| 20         | 140747               | 362894              | 138591               | 358673              | 138487               | 358901              | 92.56         | 95.88   | 93.65   |
| 30         | 136267               | 358513              | 140387               | 361008              | 141195               | 361008              | 90.71         | 96.49   | 94.93   |
| 40         | 143712               | 358971              | 133847               | 358900              | 142345               | 358978              | 95.54         | 92.54   | 96.24   |
| 50         | 140353               | 358921              | 137409               | 361287              | 139865               | 354793              | 93.32         | 94.37   | 95.68   |
| 60         | 139598               | 365723              | 139295               | 360078              | 140622               | 356872              | 91.09         | 95.99   | 95.64   |

Table 2: Peak areas and % remaining values

**Calculation:**

From the peak area, Calculate the following

$$\text{Peak area ratio} = \frac{\text{Peak area of test compound (DK-III-6-1)}}{\text{Peak area of internal standard (Verapamil)}}$$

$$\% \text{ remaining at time T} = \frac{\text{Peak area ratio at particular time T}}{\text{Peak area ratio at zero time point}} * 100$$

(T = 0, 10, 20,30,40,50 and 60)

## DATA ANALYSIS:

### Day 1

Linear regression analysis:

Slope:  $-0.0008512 \pm 0.0002741$

At X= 60, Y =  $4.524 \pm 0.009883$

$R^2 = 0.3367$

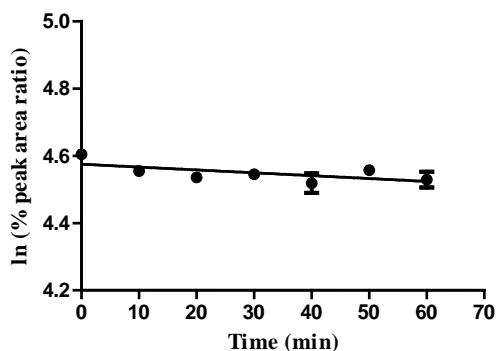

Metabolic Parameters:

Half-life:  $814 \pm 262$  min

$V_d$ :  $100 \mu\text{L}/\text{mg}$

Intrinsic clearance:  $0.08512 \mu\text{L}/\text{min}/\text{mg}$

Metabolic Rate:  $1.7024 \text{ nmol}/\text{min}/\text{mg}$

% remaining at 60 min:  $92 \pm 0.42 \%$

Note: The peak area ratios and natural log values are calculated using Microsoft excel 2010 and linear regression analysis is calculated using GraphPad prism.

### Day 2

Linear regression analysis:

Slope:  $-0.0007512 \pm 0.0002533$

At X = 60, Y =  $4.535 \pm 0.009133$

$R^2 = 0.3164$

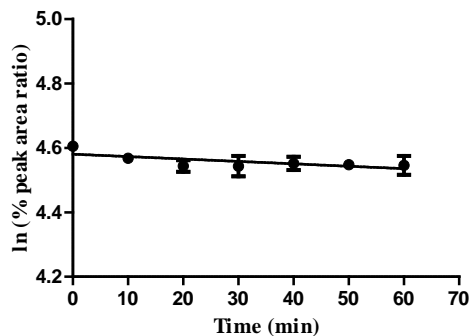

Metabolic Parameters:

Half-life:  $922 \pm 311$  min

$V_d$ :  $100 \mu\text{L}/\text{mg}$

Intrinsic clearance:  $0.07512 \mu\text{L}/\text{min}/\text{mg}$

Metabolic Rate:  $1.5024 \text{ nmol}/\text{min}/\text{mg}$

% remaining at 60 min:  $93 \pm 0.18 \%$

# Human Liver Microsomal Assay

Principal Investigator: Dr. Alexander Arnold  
Operator: Revathi Kodali  
Test Compound: **13i**  
Concentration: 10  $\mu$ M  
Date: 12-18-2017  
Facility: Milwaukee Institute for Drug Discovery

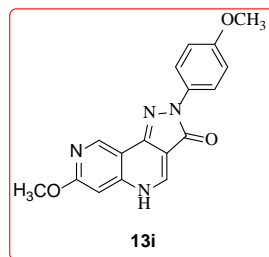

## Assay Protocol

Each evaluation included six independent assays carried out three at a time, on two different days

10. Preparation of solutions:
  - c. 1 mM test compound in DMSO.
  - d. 1  $\mu$ M 4,5 Di Phenyl Imidazole in ice cold Acetonitrile (ISTD).
11. For a total volume of Microsomal Assay Mixture (MAM) 390  $\mu$ L, sufficient for seven time points, combine the following
  - f. 282  $\mu$ L of 18.2 m $\Omega$  of water.
  - g. 80  $\mu$ L of 0.5 M potassium phosphate buffer (p<sup>H</sup> 7.4)
  - h. 20  $\mu$ L of NADPH A. (Corning life sciences, Cat # 451220)
  - i. 4  $\mu$ L of NADPH B. (Corning life sciences, Cat # 451200)
  - j. 4  $\mu$ L of test compound.
12. Sonicate MAM for 5 min and meanwhile thaw microsomes (20 mg/mL) (BD Biosciences, Cat # 452156) on ice.
13. Aliquot 100  $\mu$ L of ice cold ISTD into seven separate 1.5 mL conical vials and label them the time points for 0, 10, 20, 30, 40, 50, and 60 min.
14. Arrange the timer. Microsomes (Final concentration of 0.5 mg/mL) should be added to all time points except the zero time point.
15. Add 50  $\mu$ L of the MAM solution to the conical vial labelled as zero time point. Place the remaining MAM solution in the incubator (37 °C) for 5 min and initiate the reaction with addition of microsomes (8.8  $\mu$ L) and record the time.
16. At the end of each time interval remove 50  $\mu$ L and add to 100  $\mu$ L ISTD in conical vial, sonicate for 10 sec and spin down at 10,000 rpm for 5 minutes.
17. Take 100  $\mu$ L of supernatant and transfer to Spin-X HPLC filter tubes (Corning Incorporated, Cat # 8169) and centrifuge at 13,000 rpm for 5 minutes and take 5  $\mu$ L from this solution and dilute in 495  $\mu$ L of LCMS grade methanol (Fischer scientific, CAS # 67-56-1) in a 2mL glass auto sampler vial (Microsolv, Cat # 95025-WCV)
18. The samples are analyzed by LCMS-8040. (Shimadzu)



**Data:**

Day 1:

| Time (min) | Assay 1            |                | Assay 2            |                | Assay 3            |                | % remaining |         |         |
|------------|--------------------|----------------|--------------------|----------------|--------------------|----------------|-------------|---------|---------|
|            | CW03-030 Peak area | ISTD Peak area | CW03-030 Peak area | ISTD Peak area | CW03-030 Peak area | ISTD Peak area | Assay 1     | Assay 2 | Assay 3 |
| 0          | 54463              | 122039         | 59964              | 120743         | 51713              | 120553         | 100.06      | 99.92   | 99.99   |
| 10         | 53675              | 119669         | 57444              | 119934         | 49323              | 119380         | 100.57      | 96.37   | 96.30   |
| 20         | 49025              | 118364         | 54634              | 120220         | 48219              | 119071         | 92.87       | 91.43   | 94.39   |
| 30         | 50811              | 120347         | 54972              | 119244         | 50374              | 122775         | 94.66       | 92.75   | 95.64   |
| 40         | 50209              | 117947         | 55783              | 118776         | 47867              | 119489         | 95.44       | 94.49   | 93.37   |
| 50         | 51373              | 119429         | 54310              | 120015         | 48485              | 120371         | 96.44       | 91.05   | 93.89   |
| 60         | 50053              | 121245         | 54343              | 117623         | 50031              | 119252         | 92.56       | 92.96   | 97.79   |

Table 1: Peak areas and % remaining values

Day 2:

| Time (min) | Assay 1            |                | Assay 2            |                | Assay 3            |                | (% remaining) |         |         |
|------------|--------------------|----------------|--------------------|----------------|--------------------|----------------|---------------|---------|---------|
|            | CW03-030 Peak area | ISTD Peak area | CW03-030 Peak area | ISTD Peak area | CW03-030 Peak area | ISTD Peak area | Assay 1       | Assay 2 | Assay 3 |
| 0          | 52360              | 118118         | 57747              | 120217         | 50843              | 121863         | 100.06        | 100.07  | 100.05  |
| 10         | 52744              | 120519         | 54744              | 118523         | 49417              | 118623         | 98.79         | 96.22   | 99.90   |
| 20         | 50870              | 122550         | 54007              | 118470         | 48444              | 120175         | 93.70         | 94.97   | 96.67   |
| 30         | 51424              | 121231         | 52223              | 120610         | 47045              | 123076         | 95.75         | 90.20   | 91.66   |
| 40         | 50503              | 124126         | 53668              | 119522         | 46736              | 120907         | 91.84         | 93.54   | 92.69   |
| 50         | 49277              | 118289         | 52233              | 117465         | 46091              | 121033         | 94.03         | 92.63   | 91.32   |
| 60         | 47525              | 116313         | 52483              | 119375         | 44808              | 119405         | 92.23         | 91.59   | 89.99   |

Table 2: Peak areas and % remaining values

**Calculation:**

From the peak area, Calculate the following

$$\text{Peak area ratio} = \frac{\text{Peak area of test compound (CW-03-030)}}{\text{Peak area of internal standard (ISTD)}}$$

$$\% \text{ remaining at time T} = \frac{\text{Peak area ratio at particular time T}}{\text{Peak area ratio at zero time point}} * 100$$

(T = 0, 10, 20,30,40,50 and 60)

## DATA ANALYSIS:

### Day 1

Linear regression analysis:

Slope:  $-0.0008524 \pm 0.0002775$

At X= 60, Y =  $4.532 \pm 0.01001$

$R^2 = 0.3318$

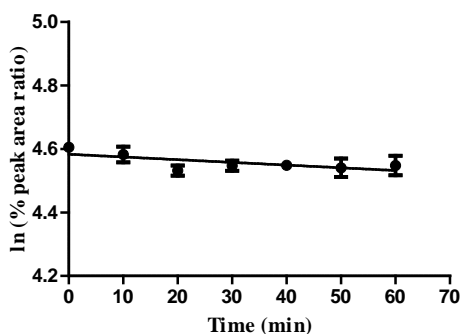

Metabolic Parameters:

Half-life:  $813 \pm 265$  min

$V_d$ :  $100 \mu\text{L}/\text{mg}$

Intrinsic clearance:  $0.08524 \mu\text{L}/\text{min}/\text{mg}$

Metabolic Rate:  $1.7048 \text{ nmol}/\text{min}/\text{mg}$

% remaining at 60 min:  $93 \pm 0.2 \%$

### Day 2

Linear regression analysis:

Slope:  $-0.001504 \pm 0.0002098$

At X = 60, Y =  $4.505 \pm 0.007563$

$R^2 = 0.7300$

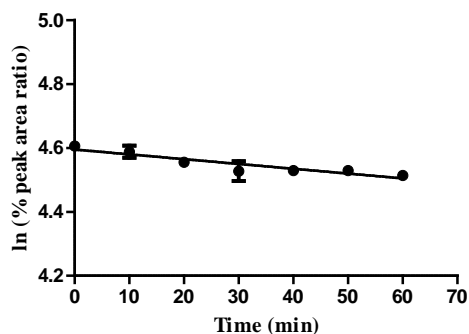

Metabolic Parameters:

Half-life:  $460 \pm 64$  min

$V_d$ :  $100 \mu\text{L}/\text{mg}$

Intrinsic clearance:  $0.1504 \mu\text{L}/\text{min}/\text{mg}$

Metabolic Rate:  $3.008 \text{ nmol}/\text{min}/\text{mg}$

% remaining at 60 min:  $90 \pm 0.15 \%$

Note: The peak area ratios and natural log values are calculated using Microsoft excel 2010 and linear regression analysis is calculated using GraphPad prism.

# Mouse Liver Microsomal Assay

Principal Investigator: Dr. Alexander Arnold

Operator: Revathi Kodali

Test Compound: **13i**

Concentration: 10  $\mu$ M

Date: 12-18-2017

Facility: Milwaukee Institute for Drug Discovery

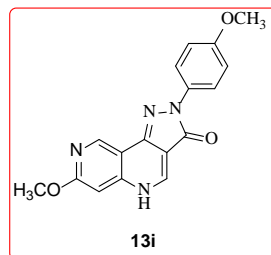

## Assay Protocol

Each evaluation included six independent assays carried out three at a time, on two different days

19. Preparation of solutions:

e. 1 mM test compound in DMSO.

f. 1  $\mu$ M 4,5 Di Phenyl Imidazole in ice cold Acetonitrile (ISTD).

20. For a total volume of Microsomal Assay Mixture (MAM) 390  $\mu$ L, sufficient for seven time points, combine the following

k. 282  $\mu$ L of 18.2 m $\Omega$  of water.

l. 80  $\mu$ L of 0.5 M potassium phosphate buffer (p<sup>H</sup> 7.4)

m. 20  $\mu$ L of NADPH A. (Corning life sciences, Cat # 451220)

n. 4  $\mu$ L of NADPH B. (Corning life sciences, Cat # 451200)

o. 4  $\mu$ L of test compound.

21. Sonicate MAM for 5 min and meanwhile thaw microsomes (20 mg/mL) (Life technologies, Cat # MSMC-PL) on ice.

22. Aliquot 100  $\mu$ L of ice cold ISTD into seven separate 1.5 mL conical vials and label them the time points for 0, 10, 20, 30, 40, 50, and 60 min.

23. Arrange the timer. Microsomes (Final concentration of 0.5 mg/mL) should be added to all time points except the zero time point.

24. Add 50  $\mu$ L of the MAM solution to the conical vial labelled as zero time point. Place the remaining MAM solution in the incubator (37  $^{\circ}$ C) for 5 min and initiate the reaction with addition of microsomes (8.8  $\mu$ L) and record the time.

25. At the end of each time interval remove 50  $\mu$ L and add to 100  $\mu$ L ISTD in conical vial, sonicate for 10 sec and spin down at 10,000 rpm for 5 minutes.

26. Take 100  $\mu$ L of supernatant and transfer to Spin-X HPLC filter tubes (Corning Incorporated, Cat # 8169) and centrifuge at 13,000 rpm for 5 minutes and take 5  $\mu$ L from this solution and dilute in 495  $\mu$ L of LCMS grade methanol (Fischer scientific, CAS # 67-56-1) in a 2mL glass auto sampler vial (Microsolv, Cat # 95025-WCV)

27. The samples are analyzed by LCMS-8040. (Shimadzu)

**Data:**

Day 1:

| Time (min) | Assay 1            |                | Assay 2            |                | Assay 3            |                | % remaining |         |         |
|------------|--------------------|----------------|--------------------|----------------|--------------------|----------------|-------------|---------|---------|
|            | CW03-030 Peak area | ISTD Peak area | CW03-030 Peak area | ISTD Peak area | CW03-030 Peak area | ISTD Peak area | Assay 1     | Assay 2 | Assay 3 |
| 0          | 54849              | 123424         | 56485              | 120211         | 55454              | 121817         | 100.08      | 99.97   | 100.04  |
| 10         | 54555              | 123689         | 54728              | 119879         | 54672              | 121646         | 99.33       | 97.13   | 98.77   |
| 20         | 51623              | 120410         | 52185              | 121097         | 53823              | 119279         | 96.56       | 91.68   | 99.17   |
| 30         | 50768              | 119304         | 53305              | 121049         | 50484              | 120090         | 95.84       | 93.69   | 92.39   |
| 40         | 51926              | 118435         | 51176              | 118460         | 53462              | 118334         | 98.74       | 91.91   | 99.29   |
| 50         | 53303              | 120736         | 51554              | 120332         | 51049              | 117545         | 99.43       | 91.15   | 95.44   |
| 60         | 50830              | 121128         | 50523              | 119293         | 50781              | 120366         | 94.51       | 90.11   | 92.72   |

Table 1: Peak areas and % remaining values

Day 2:

| Time (min) | Assay 1            |                | Assay 2            |                | Assay 3            |                | (% remaining) |         |         |
|------------|--------------------|----------------|--------------------|----------------|--------------------|----------------|---------------|---------|---------|
|            | CW03-030 Peak area | ISTD Peak area | CW03-030 Peak area | ISTD Peak area | CW03-030 Peak area | ISTD Peak area | Assay 1       | Assay 2 | Assay 3 |
| 0          | 53258              | 119305         | 56261              | 121550         | 57983              | 118109         | 100.09        | 99.97   | 99.98   |
| 10         | 52592              | 121231         | 53815              | 120470         | 53196              | 119751         | 97.26         | 96.48   | 90.47   |
| 20         | 51090              | 118281         | 52692              | 118234         | 54834              | 120263         | 96.84         | 96.25   | 92.86   |
| 30         | 51137              | 123924         | 51407              | 120551         | 52352              | 117266         | 92.52         | 92.10   | 90.92   |
| 40         | 52069              | 118562         | 51496              | 117290         | 55905              | 120825         | 98.46         | 94.82   | 94.23   |
| 50         | 50529              | 120743         | 52890              | 119520         | 53056              | 113142         | 93.83         | 95.57   | 95.50   |
| 60         | 47670              | 119553         | 51690              | 121416         | 54464              | 118362         | 89.40         | 91.95   | 93.71   |

Table 2: Peak areas and % remaining values

**Calculation:**

From the peak area, Calculate the following

$$\text{Peak area ratio} = \frac{\text{Peak area of test compound (CW-03-030)}}{\text{Peak area of internal standard (ISTD)}}$$

$$\% \text{ remaining at time T} = \frac{\text{Peak area ratio at particular time T}}{\text{Peak area ratio at zero time point}} * 100$$

(T = 0, 10, 20,30,40,50 and 60)

## DATA ANALYSIS:

### Day 1

Linear regression analysis:

Slope:  $-0.001045 \pm 0.0003219$

At X= 60, Y =  $4.534 \pm 0.01161$

$R^2 = 0.3569$

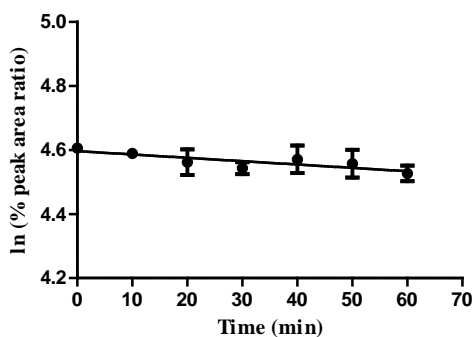

### Day 2

Linear regression analysis:

Slope:  $-0.0008940 \pm 0.0003124$

At X = 60, Y =  $4.526 \pm 0.001126$

$R^2 = 0.3012$

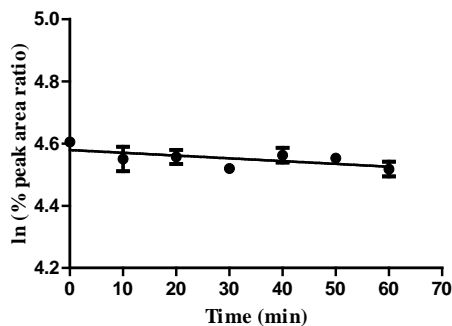

Metabolic Parameters:

Half-life:  $663 \pm 204$  min

$V_d$ :  $100 \mu\text{L}/\text{mg}$

Intrinsic clearance:  $0.1045 \mu\text{L}/\text{min}/\text{mg}$

Metabolic Rate:  $2.09 \text{ nmol}/\text{min}/\text{mg}$

% remaining at 60 min:  $93 \pm 0.25 \%$

Metabolic Parameters:

Half-life:  $775 \pm 270$  min

$V_d$ :  $100 \mu\text{L}/\text{mg}$

Intrinsic clearance:  $0.0894 \mu\text{L}/\text{min}/\text{mg}$

Metabolic Rate:  $1.788 \text{ nmol}/\text{min}/\text{mg}$

% remaining at 60 min:  $92 \pm 0.3 \%$

Note: The peak area ratios and natural log values are calculated using Microsoft excel 2010 and linear regression analysis is calculated using GraphPad prism.

# Human Liver Microsomal Assay

Principal Investigator: Dr. Alexander Arnold

Operator: Revathi Kodali

Test Compound: **8i**

Concentration: 10  $\mu$ M

Date: 04-06-2016

Facility: Milwaukee Institute for Drug Discovery

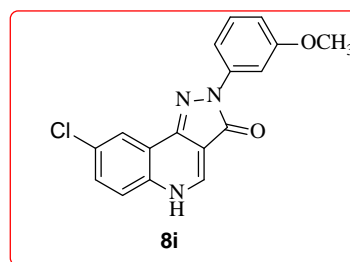

## Assay Protocol

Each evaluation included six independent assays carried out three at a time, on two different days

1. Preparation of solutions:
  - a. 1 mM test compound in DMSO.
  - b. 1  $\mu$ M Verapamil in ice cold Acetonitrile (ISTD).
2. For a total volume of Microsomal Assay Mixture (MAM) 390  $\mu$ L, sufficient for seven time points, combine the following
  - a. 282  $\mu$ L of 18.2 m $\Omega$  of water.
  - b. 80  $\mu$ L of 0.5 M potassium phosphate buffer (p<sup>H</sup> 7.4)
  - c. 20  $\mu$ L of NADPH A. (Corning life sciences, Cat # 451220)
  - d. 4  $\mu$ L of NADPH B. (Corning life sciences, Cat # 451200)
  - e. 4  $\mu$ L of test compound.
3. Sonicate MAM for 5 min and meanwhile thaw microsomes (20 mg/mL) (BD Gentest, Cat # 452156) on ice.
4. Aliquot 100  $\mu$ L of ice cold ISTD into seven separate 1.5 mL conical vials and label them the time points for 0, 10, 20, 30, 40, 50, and 60 min.
5. Arrange the timer. Microsomes (Final concentration of 0.5 mg/mL) should be added to all time points except the zero time point.
6. Add 50  $\mu$ L of the MAM solution to the conical vial labelled as zero time point. Place the remaining MAM solution in the incubator (37  $^{\circ}$ C) for 5 min and initiate the reaction with addition of microsomes (8.8  $\mu$ L) and record the time.
7. At the end of each time interval remove 50  $\mu$ L and add to 100  $\mu$ L ISTD in conical vial, sonicate for 10 sec and spin down at 10,000 rpm for 5 minutes.
8. Take 100  $\mu$ L of supernatant and transfer to Spin-X HPLC filter tubes (Corning Incorporated, Cat # 8169) and centrifuge at 13,000 rpm for 5 minutes and take 5  $\mu$ L from this solution and dilute in 495  $\mu$ L of LCMS grade methanol (Fischer scientific, CAS # 67-56-1) in an 2mL glass auto sampler vial (Microsolv, Cat # 95025-WCV)
9. The samples are analyzed by LCMS-8040. (Shimadzu)

**Data:**

Day 1:

| Time (min) | Assay 1           |                     | Assay 2           |                     | Assay 3           |                     | % remaining |         |         |
|------------|-------------------|---------------------|-------------------|---------------------|-------------------|---------------------|-------------|---------|---------|
|            | LAU 159 Peak area | Verapamil Peak area | LAU 159 Peak area | Verapamil Peak area | LAU 159 Peak area | Verapamil Peak area | Assay 1     | Assay 2 | Assay 3 |
| 0          | 80398             | 770706              | 79247             | 781412              | 81322             | 768705              | 100.30      | 100.41  | 99.80   |
| 10         | 78100             | 757087              | 75533             | 774930              | 79581             | 765630              | 99.19       | 96.50   | 98.05   |
| 20         | 76832             | 781877              | 73032             | 767002              | 76372             | 772311              | 94.48       | 94.27   | 93.29   |
| 30         | 71132             | 765148              | 68999             | 781510              | 73574             | 768806              | 89.38       | 87.41   | 90.28   |
| 40         | 68442             | 762279              | 65432             | 770550              | 67089             | 772739              | 86.33       | 84.07   | 81.90   |
| 50         | 68744             | 780528              | 68583             | 780384              | 68078             | 762260              | 84.68       | 87.01   | 84.25   |
| 60         | 65384             | 761871              | 66839             | 782566              | 66854             | 769953              | 82.52       | 84.56   | 81.91   |

Table 1: Peak areas and % remaining values

Day 2:

| Time (min) | Assay 1           |                     | Assay 2           |                     | Assay 3           |                     | (% remaining) |         |         |
|------------|-------------------|---------------------|-------------------|---------------------|-------------------|---------------------|---------------|---------|---------|
|            | LAU 159 Peak area | Verapamil Peak area | LAU 159 Peak area | Verapamil Peak area | LAU 159 Peak area | Verapamil Peak area | Assay 1       | Assay 2 | Assay 3 |
| 0          | 83578             | 764869              | 81348             | 762725              | 82729             | 765486              | 100.24        | 99.67   | 100.06  |
| 10         | 81869             | 773664              | 79781             | 777443              | 80586             | 777335              | 97.08         | 95.90   | 95.99   |
| 20         | 77477             | 756111              | 76199             | 767523              | 78620             | 780606              | 94.00         | 92.78   | 93.25   |
| 30         | 76977             | 787473              | 73745             | 781492              | 76424             | 776417              | 89.68         | 88.19   | 91.14   |
| 40         | 70419             | 763525              | 68213             | 764927              | 71372             | 768298              | 84.61         | 83.34   | 86.01   |
| 50         | 69693             | 773427              | 66577             | 770599              | 70639             | 768061              | 82.66         | 80.74   | 85.15   |
| 60         | 71664             | 761028              | 68158             | 772689              | 69696             | 778601              | 86.39         | 82.43   | 82.88   |

Table 2: Peak areas and % remaining values

**Calculation:**

From the peak area, Calculate the following

$$\text{Peak area ratio} = \frac{\text{Peak area of test compound (LAU 159)}}{\text{Peak area of internal standard (Verapamil)}}$$

$$\% \text{ remaining at time T} = \frac{\text{Peak area ratio at particular time T}}{\text{Peak area ratio at zero time point}} * 100$$

(T = 0, 10, 20,30,40,50 and 60)

## DATA ANALYSIS:

### Day 1

Linear regression analysis:

Slope:  $-0.003394 \pm 0.0002532$

At X= 60, Y =  $4.401 \pm 0.009130$

$R^2 = 0.9044$

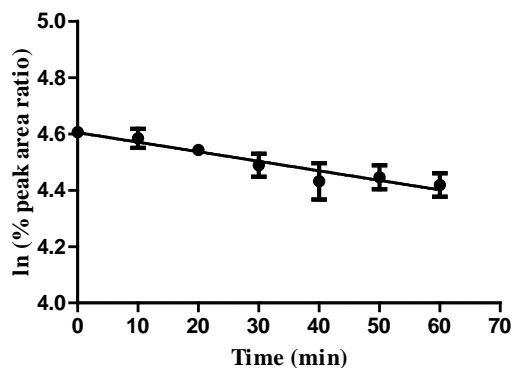

Metabolic Parameters:

Half-life:  $204.18 \pm 15.23$  min

$V_d$ : 100  $\mu\text{L}/\text{mg}$

Intrinsic clearance: 0.3394  $\mu\text{L}/\text{min}/\text{mg}$

Metabolic Rate: 6.788 nmol/min/mg

% remaining at 60 min:  $81.53 \pm 0.16$  %

### Day 2

Linear regression analysis:

Slope:  $-0.003310 \pm 0.0002487$

At X = 60, Y =  $4.399 \pm 0.008968$

$R^2 = 0.9031$

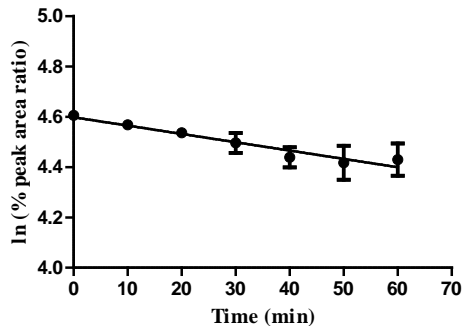

Metabolic Parameters:

Half-life:  $209.36 \pm 15.73$  min

$V_d$ : 100  $\mu\text{L}/\text{mg}$

Intrinsic clearance: 0.331  $\mu\text{L}/\text{min}/\text{mg}$

Metabolic Rate: 6.62 nmol/min/mg

% remaining at 60 min:  $81.36 \pm 0.16$  %

Note: The peak area ratios and natural log values are calculated using Microsoft excel 2010 and linear regression analysis is calculated using GraphPad prism.



# Mouse Liver Microsomal Assay

Principal Investigator: Dr. Alexander Arnold

Operator: Revathi Kodali

Test Compound: **8i**

Concentration: 10  $\mu$ M

Date: 04-06-2016

Facility: Milwaukee Institute for Drug Discovery

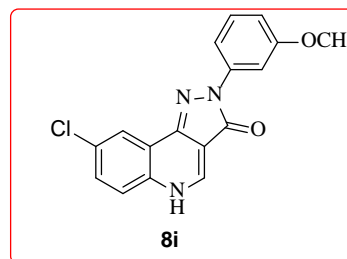

## Assay Protocol

Each evaluation included six independent assays carried out three at a time, on two different days

- Preparation of solutions:
  - 1 mM test compound in DMSO.
  - 1  $\mu$ M Verapamil in ice cold Acetonitrile (ISTD).
- For a total volume of Microsomal Assay Mixture (MAM) 390  $\mu$ L, sufficient for seven time points, combine the following
  - 282  $\mu$ L of 18.2 m $\Omega$  of water.
  - 80  $\mu$ L of 0.5 M potassium phosphate buffer (pH 7.4)
  - 20  $\mu$ L of NADPH A. (Corning life sciences, Cat # 451220)
  - 4  $\mu$ L of NADPH B. (Corning life sciences, Cat # 451200)
  - 4  $\mu$ L of test compound.
- Sonicate MAM for 5 min and meanwhile thaw microsomes (20 mg/mL) (Life technologies, Cat # MSMC-PL) on ice.
- Aliquot 100  $\mu$ L of ice cold ISTD into seven separate 1.5 mL conical vials and label them the time points for 0, 10, 20, 30, 40, 50, and 60 min.
- Arrange the timer. Microsomes (Final concentration of 0.5 mg/mL) should be added to all time points except the zero time point.
- Add 50  $\mu$ L of the MAM solution to the conical vial labelled as zero time point. Place the remaining MAM solution in the incubator (37  $^{\circ}$ C) for 5 min and initiate the reaction with addition of microsomes (8.8  $\mu$ L) and record the time.
- At the end of each time interval remove 50  $\mu$ L and add to 100  $\mu$ L ISTD in conical vial, sonicate for 10 sec and spin down at 10,000 rpm for 5 minutes.
- Take 100  $\mu$ L of supernatant and transfer to Spin-X HPLC filter tubes (Corning Incorporated, Cat # 8169) and centrifuge at 13,000 rpm for 5 minutes and take 5  $\mu$ L from this solution and dilute in 495  $\mu$ L of LCMS grade methanol (Fischer scientific, CAS # 67-56-1) in a 2mL glass auto sampler vial (Microsolv, Cat # 95025-WCV)
- The samples are analyzed by LCMS-8040. (Shimadzu)

**Data:**

Day 1:

| Time (min) | Assay 1           |                     | Assay 2           |                     | Assay 3           |                     | % remaining |         |         |
|------------|-------------------|---------------------|-------------------|---------------------|-------------------|---------------------|-------------|---------|---------|
|            | LAU 159 Peak area | Verapamil Peak area | LAU 159 Peak area | Verapamil Peak area | LAU 159 Peak area | Verapamil Peak area | Assay 1     | Assay 2 | Assay 3 |
| 0          | 86708             | 777698              | 85735             | 782218              | 85879             | 767074              | 100.44      | 99.64   | 99.96   |
| 10         | 76231             | 777526              | 74721             | 778315              | 78865             | 772011              | 88.32       | 87.27   | 91.21   |
| 20         | 66139             | 765299              | 68247             | 762276              | 70083             | 761217              | 77.85       | 81.39   | 82.20   |
| 30         | 59435             | 769865              | 60822             | 775396              | 66560             | 780394              | 69.55       | 71.30   | 76.15   |
| 40         | 57074             | 767913              | 58779             | 767323              | 62645             | 779036              | 66.95       | 69.63   | 71.79   |
| 50         | 55032             | 771478              | 57997             | 779151              | 55850             | 769895              | 64.26       | 67.66   | 64.77   |
| 60         | 53264             | 763246              | 54568             | 780889              | 53737             | 780280              | 62.87       | 63.52   | 61.49   |

Table 1: Peak areas and % remaining values

Day 2:

| Time (min) | Assay 1           |                     | Assay 2           |                     | Assay 3           |                     | (% remaining) |         |         |
|------------|-------------------|---------------------|-------------------|---------------------|-------------------|---------------------|---------------|---------|---------|
|            | LAU 159 Peak area | Verapamil Peak area | LAU 159 Peak area | Verapamil Peak area | LAU 159 Peak area | Verapamil Peak area | Assay 1       | Assay 2 | Assay 3 |
| 0          | 86093             | 772034              | 86606             | 765303              | 84547             | 764973              | 99.56         | 100.14  | 99.57   |
| 10         | 75885             | 766501              | 74432             | 759018              | 77931             | 776061              | 88.39         | 86.78   | 90.46   |
| 20         | 67311             | 761581              | 67630             | 769773              | 67513             | 766499              | 78.91         | 77.75   | 79.35   |
| 30         | 61790             | 776182              | 61097             | 764013              | 63949             | 787136              | 71.07         | 70.76   | 73.19   |
| 40         | 58705             | 768779              | 57288             | 768303              | 58017             | 774773              | 68.18         | 65.98   | 67.46   |
| 50         | 56741             | 777107              | 55177             | 776275              | 53768             | 768066              | 65.19         | 62.90   | 63.06   |
| 60         | 55772             | 768839              | 54383             | 778823              | 53547             | 771612              | 64.76         | 61.79   | 62.51   |

Table 2: Peak areas and % remaining values

**Calculation:**

From the peak area, Calculate the following

$$\text{Peak area ratio} = \frac{\text{Peak area of test compound (LAU 159)}}{\text{Peak area of internal standard (Verapamil)}}$$

$$\% \text{ remaining at time T} = \frac{\text{Peak area ratio at particular time T}}{\text{Peak area ratio at zero time point}} * 100$$

(T = 0, 10, 20,30,40,50 and 60)

## DATA ANALYSIS:

### Day 1

Linear regression analysis:

Slope:  $-0.007724 \pm 0.0004410$

At X= 60, Y =  $4.100 \pm 0.01590$

$R^2 = 0.9417$

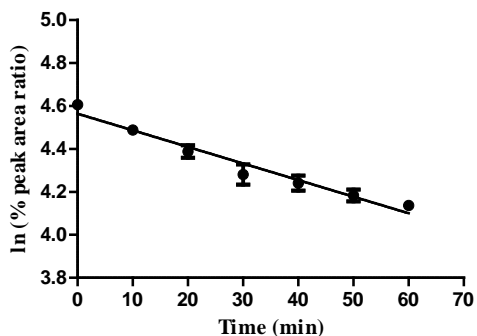

Metabolic Parameters:

Half-life:  $89.72 \pm 5.12$  min

$V_d$ :  $100 \mu\text{L}/\text{mg}$

Intrinsic clearance:  $0.7724 \mu\text{L}/\text{min}/\text{mg}$

Metabolic Rate:  $15.448 \text{ nmol}/\text{min}/\text{mg}$

% remaining at 60 min:  $60.34 \pm 0.23$  %

### Day 2

Linear regression analysis:

Slope:  $-0.007837 \pm 0.0004718$

At X = 60, Y =  $4.083 \pm 0.01701$

$R^2 = 0.9356$

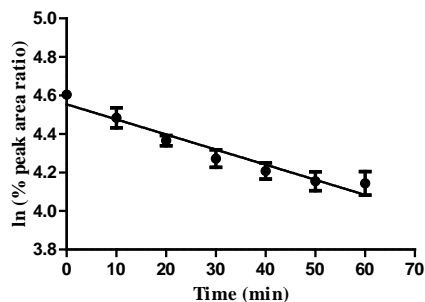

Metabolic Parameters:

Half-life:  $88.42 \pm 5.32$  min

$V_d$ :  $100 \mu\text{L}/\text{mg}$

Intrinsic clearance:  $0.7837 \mu\text{L}/\text{min}/\text{mg}$

Metabolic Rate:  $15.674 \text{ nmol}/\text{min}/\text{mg}$

% remaining at 60 min:  $59.32 \pm 0.24$  %

Note: The peak area ratios and natural log values are calculated using Microsoft excel 2010 and linear regression analysis is calculated using GraphPad prism.

# Human Liver Microsomal Assay

Principal Investigator: Dr. Alexander Arnold

Operator: Revathi Kodali

Test Compound: **8j**

Concentration: 10  $\mu$ M

Date: 05-06-2016

Facility: Milwaukee Institute for Drug Discovery

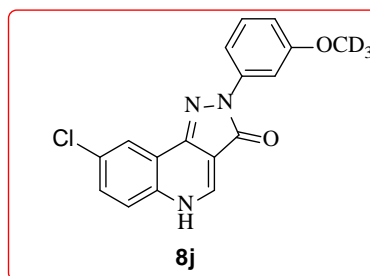

## Assay Protocol

Each evaluation included six independent assays carried out three at a time, on two different days

- Preparation of solutions:
  - 1 mM test compound in DMSO.
  - 2  $\mu$ M 4,5 Diphenyl Imidazole in ice cold Acetonitrile (ISTD).
- For a total volume of Microsomal Assay Mixture (MAM) 390  $\mu$ L, sufficient for seven time points, combine the following
  - 282  $\mu$ L of 18.2 m $\Omega$  of water.
  - 80  $\mu$ L of 0.5 M potassium phosphate buffer (p<sup>H</sup> 7.4)
  - 20  $\mu$ L of NADPH A. (Corning life sciences, Cat # 451220)
  - 4  $\mu$ L of NADPH B. (Corning life sciences, Cat # 451200)
  - 4  $\mu$ L of test compound.
- Sonicate MAM for 5 min and meanwhile thaw microsomes (20 mg/mL) (BD Gentest, Cat # 452156) on ice.
- Aliquot 100  $\mu$ L of ice cold ISTD into seven separate 1.5 mL conical vials and label them the time points for 0, 10, 20, 30, 40, 50, and 60 min.
- Arrange the timer. Microsomes (Final concentration of 0.5 mg/mL) should be added to all time points except the zero time point.
- Add 50  $\mu$ L of the MAM solution to the conical vial labelled as zero time point. Place the remaining MAM solution in the incubator (37  $^{\circ}$ C) for 5 min and initiate the reaction with addition of microsomes (8.8  $\mu$ L) and record the time.
- At the end of each time interval remove 50  $\mu$ L and add to 100  $\mu$ L ISTD in conical vial, sonicate for 10 sec and spin down at 10,000 rpm for 5 minutes.
- Take 100  $\mu$ L of supernatant and transfer to Spin-X HPLC filter tubes (Corning Incorporated, Cat # 8169) and centrifuge at 13,000 rpm for 5 minutes and take 5  $\mu$ L from this solution and dilute in 495  $\mu$ L of LCMS grade methanol (Fischer scientific, CAS # 67-56-1) in a 2mL glass auto sampler vial (Microsolv, Cat # 95025-WCV)
- The samples are analyzed by LCMS-8040. (Shimadzu)

**Data:**

Day 1:

| Time (min) | Assay 1             |                | Assay 2             |                | Assay 3             |                | % remaining |         |         |
|------------|---------------------|----------------|---------------------|----------------|---------------------|----------------|-------------|---------|---------|
|            | DK-I-59-1 Peak area | ISTD Peak area | DK-I-59-1 Peak area | ISTD Peak area | DK-I-59-1 Peak area | ISTD Peak area | Assay 1     | Assay 2 | Assay 3 |
| 0          | 332661              | 2109886        | 331693              | 2088212        | 324161              | 2109905        | 99.79       | 99.90   | 99.76   |
| 10         | 321980              | 2089987        | 316452              | 2009030        | 317270              | 2100090        | 97.50       | 99.06   | 98.10   |
| 20         | 319442              | 2109877        | 321330              | 2087202        | 311732              | 2082911        | 95.82       | 96.82   | 97.18   |
| 30         | 300905              | 2009948        | 302080              | 1989310        | 299219              | 2008386        | 94.75       | 95.50   | 96.74   |
| 40         | 310592              | 2100979        | 313763              | 2099050        | 292364              | 2002890        | 93.56       | 94.01   | 94.78   |
| 50         | 319432              | 2193028        | 301923              | 2009884        | 288651              | 1968260        | 92.18       | 94.47   | 95.22   |
| 60         | 310961              | 2099871        | 295863              | 2008786        | 303022              | 2089233        | 93.72       | 92.63   | 94.18   |

Table 1: Peak areas and % remaining values

Day 2:

| Time (min) | Assay 1             |                | Assay 2             |                | Assay 3             |                | (% remaining) |         |         |
|------------|---------------------|----------------|---------------------|----------------|---------------------|----------------|---------------|---------|---------|
|            | DK-I-59-1 Peak area | ISTD Peak area | DK-I-59-1 Peak area | ISTD Peak area | DK-I-59-1 Peak area | ISTD Peak area | Assay 1       | Assay 2 | Assay 3 |
| 0          | 331986              | 2092889        | 334435              | 2102273        | 318009              | 2083826        | 99.76         | 100.05  | 99.74   |
| 10         | 333335              | 2089284        | 320734              | 2028733        | 323313              | 2198835        | 100.34        | 99.43   | 96.10   |
| 20         | 321611              | 2109091        | 308978              | 2000783        | 305776              | 2089206        | 95.90         | 97.12   | 95.66   |
| 30         | 316422              | 2109273        | 326793              | 2163622        | 313245              | 2183287        | 94.34         | 94.99   | 93.77   |
| 40         | 313007              | 2098285        | 315920              | 2089327        | 303331              | 2078788        | 93.81         | 95.09   | 95.37   |
| 50         | 309075              | 2012827        | 316116              | 2109029        | 315823              | 2183281        | 96.57         | 94.26   | 94.54   |
| 60         | 311918              | 2091878        | 306049              | 2089289        | 300968              | 2082891        | 93.77         | 92.12   | 94.44   |

Table 2: Peak areas and % remaining values

**Calculation:**

From the peak area, Calculate the following

$$\text{Peak area ratio} = \frac{\text{Peak area of test compound (DK-I-59-1)}}{\text{Peak area of internal standard (Verapamil)}}$$

$$\% \text{ remaining at time T} = \frac{\text{Peak area ratio at particular time T}}{\text{Peak area ratio at zero time point}} * 100$$

(T = 0, 10, 20,30,40,50 and 60)

## DATA ANALYSIS:

### Day 1

Linear regression analysis:

Slope:  $-0.001113 \pm 0.0001062$

At X= 60, Y =  $4.531 \pm 0.003829$

$R^2 = 0.8526$

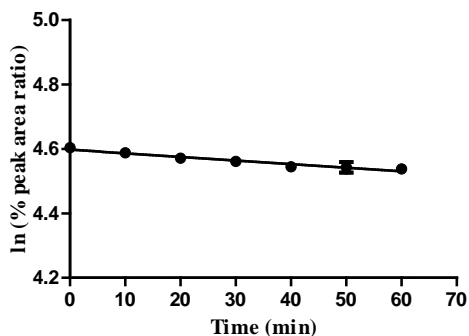

### Day 2

Linear regression analysis:

Slope:  $-0.001026 \pm 0.0001577$

At X = 60, Y =  $4.534 \pm 0.005687$

$R^2 = 0.6902$

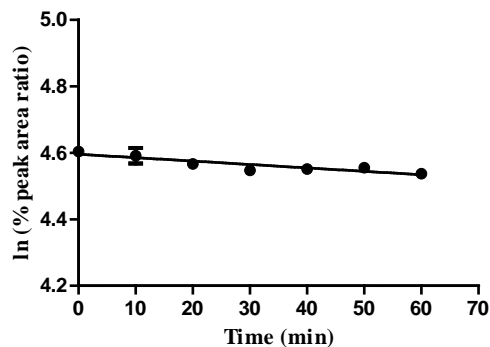

Metabolic Parameters:

Half-life:  $622.64 \pm 60$  min

$V_d$ : 100  $\mu\text{L}/\text{mg}$

Intrinsic clearance: 0.1113  $\mu\text{L}/\text{min}/\text{mg}$

Metabolic Rate: 2.226  $\text{nmol}/\text{min}/\text{mg}$

% remaining at 60 min:  $92.85 \pm 0.07$  %

Metabolic Parameters:

Half-life:  $675.43 \pm 103$  min

$V_d$ : 100  $\mu\text{L}/\text{mg}$

Intrinsic clearance: 0.1026  $\mu\text{L}/\text{min}/\text{mg}$

Metabolic Rate: 2.052  $\text{nmol}/\text{min}/\text{mg}$

% remaining at 60 min:  $93.13 \pm 0.11$  %

Note: The peak area ratios and natural log values are calculated using Microsoft excel 2010 and linear regression analysis is calculated using GraphPad prism.

# Mouse Liver Microsomal Assay

Principal Investigator: Dr. Alexander Arnold

Operator: Revathi Kodali

Test Compound: **8j**

Concentration: 10  $\mu$ M

Date: 05-06-2016

Facility: Milwaukee Institute for Drug Discovery

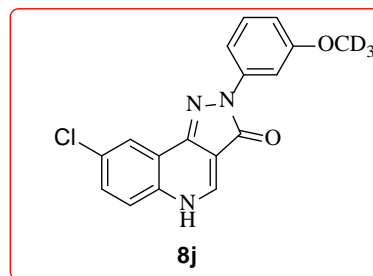

## Assay Protocol

Each evaluation included six independent assays carried out three at a time, on two different days

1. Preparation of solutions:
  - a. 1 mM test compound in DMSO.
  - b. 2  $\mu$ M 4,5 Diphenyl Imidazole in ice cold Acetonitrile (ISTD).
2. For a total volume of Microsomal Assay Mixture (MAM) 390  $\mu$ L, sufficient for seven time points, combine the following
  - a. 282  $\mu$ L of 18.2 m $\Omega$  of water.
  - b. 80  $\mu$ L of 0.5 M potassium phosphate buffer (pH 7.4)
  - c. 20  $\mu$ L of NADPH A. (Corning life sciences, Cat # 451220)
  - d. 4  $\mu$ L of NADPH B. (Corning life sciences, Cat # 451200)
  - e. 4  $\mu$ L of test compound.
3. Sonicate MAM for 5 min and meanwhile thaw microsomes (20 mg/mL) (BD Gentest, Cat # 452156) on ice.
4. Aliquot 100  $\mu$ L of ice cold ISTD into seven separate 1.5 mL conical vials and label them the time points for 0, 10, 20, 30, 40, 50, and 60 min.
5. Arrange the timer. Microsomes (Final concentration of 0.5 mg/mL) should be added to all time points except the zero time point.
6. Add 50  $\mu$ L of the MAM solution to the conical vial labelled as zero time point. Place the remaining MAM solution in the incubator (37  $^{\circ}$ C) for 5 min and initiate the reaction with addition of microsomes (8.8  $\mu$ L) and record the time.
7. At the end of each time interval remove 50  $\mu$ L and add to 100  $\mu$ L ISTD in conical vial, sonicate for 10 sec and spin down at 10,000 rpm for 5 minutes.
8. Take 100  $\mu$ L of supernatant and transfer to Spin-X HPLC filter tubes (Corning Incorporated, Cat # 8169) and centrifuge at 13,000 rpm for 5 minutes and take 5  $\mu$ L from this solution and dilute in 495  $\mu$ L of LCMS grade methanol (Fischer scientific, CAS # 67-56-1) in an 2mL glass auto sampler vial (Microsolv, Cat # 95025-WCV)
9. The samples are analyzed by LCMS-8040. (Shimadzu)

**Data:**

Day 1:

| Time (min) | Assay 1             |                | Assay 2             |                | Assay 3             |                | % remaining |         |         |
|------------|---------------------|----------------|---------------------|----------------|---------------------|----------------|-------------|---------|---------|
|            | DK-I-59-1 Peak area | ISTD Peak area | DK-I-59-1 Peak area | ISTD Peak area | DK-I-59-1 Peak area | ISTD Peak area | Assay 1     | Assay 2 | Assay 3 |
| 0          | 364668              | 2067368        | 384616              | 2097328        | 382943              | 2018928        | 100.22      | 100.21  | 99.83   |
| 10         | 334364              | 2087386        | 358462              | 2023892        | 372601              | 2100921        | 91.01       | 96.78   | 93.34   |
| 20         | 339956              | 2193899        | 337084              | 2083872        | 359689              | 2082817        | 88.04       | 88.39   | 90.89   |
| 30         | 313196              | 2027898        | 324275              | 2089289        | 353631              | 2120902        | 87.75       | 84.81   | 87.75   |
| 40         | 301354              | 2087323        | 319986              | 2172783        | 320297              | 2010256        | 82.03       | 80.47   | 83.85   |
| 50         | 285346              | 2000988        | 290054              | 2008751        | 320503              | 2178237        | 81.02       | 78.90   | 77.44   |
| 60         | 285294              | 2183826        | 301279              | 2153539        | 302164              | 2073280        | 74.22       | 76.44   | 76.70   |

Table 1: Peak areas and % remaining values

Day 2:

| Time (min) | Assay 1             |                | Assay 2             |                | Assay 3             |                | (% remaining) |         |         |
|------------|---------------------|----------------|---------------------|----------------|---------------------|----------------|---------------|---------|---------|
|            | DK-I-59-1 Peak area | ISTD Peak area | DK-I-59-1 Peak area | ISTD Peak area | DK-I-59-1 Peak area | ISTD Peak area | Assay 1       | Assay 2 | Assay 3 |
| 0          | 344482              | 1997834        | 344482              | 2009283        | 367481              | 1982372        | 100.24        | 100.26  | 100.20  |
| 10         | 335911              | 2082382        | 335911              | 2058389        | 360082              | 2072061        | 93.78         | 95.43   | 93.93   |
| 20         | 320196              | 2100381        | 320196              | 2089389        | 343194              | 2089499        | 88.63         | 89.61   | 88.78   |
| 30         | 307994              | 2081282        | 307994              | 2044013        | 317081              | 1997383        | 86.03         | 88.11   | 85.81   |
| 40         | 306138              | 2082919        | 286138              | 1968703        | 313906              | 2004773        | 85.45         | 84.99   | 84.63   |
| 50         | 306151              | 2182981        | 286151              | 2072378        | 300644              | 1998990        | 81.53         | 80.74   | 81.29   |
| 60         | 289745              | 2188239        | 279745              | 2109823        | 301367              | 2047582        | 76.98         | 77.53   | 79.55   |

Table 2: Peak areas and % remaining values

**Calculation:**

From the peak area, Calculate the following

$$\text{Peak area ratio} = \frac{\text{Peak area of test compound (DK-I-59-1)}}{\text{Peak area of internal standard (Verapamil)}}$$

$$\% \text{ remaining at time T} = \frac{\text{Peak area ratio at particular time T}}{\text{Peak area ratio at zero time point}} * 100$$

(T = 0, 10, 20,30,40,50 and 60)



## DATA ANALYSIS:

### Day 1

Linear regression analysis:

Slope:  $-0.004473 \pm 0.0002139$

At X= 60, Y =  $4.324 \pm 0.007712$

$R^2 = 0.9584$

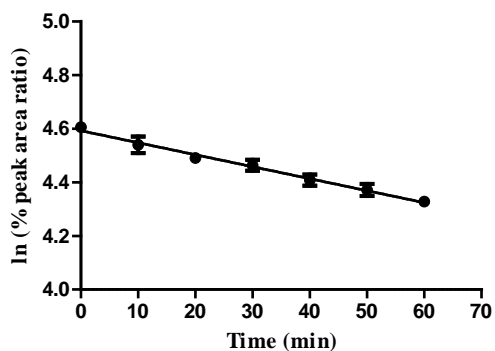

Metabolic Parameters:

Half-life:  $154.92 \pm 7.4$  min

$V_d$ : 100  $\mu\text{L}/\text{mg}$

Intrinsic clearance: 0.4473  $\mu\text{L}/\text{min}/\text{mg}$

Metabolic Rate: 8.946 nmol/min/mg

% remaining at 60 min:  $75.48 \pm 0.13$  %

Note: The peak area ratios and natural log values are calculated using Microsoft excel 2010 and linear regression analysis is calculated using GraphPad prism.

### Day 2

Linear regression analysis:

Slope:  $-0.003925 \pm 0.0001689$

At X = 60, Y =  $4.354 \pm 0.006089$

$R^2 = 0.9660$

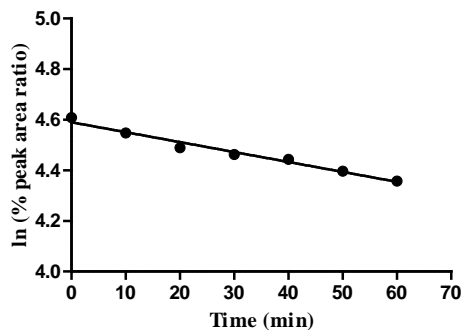

Metabolic Parameters:

Half-life:  $176.56 \pm 8$  min

$V_d$ : 100  $\mu\text{L}/\text{mg}$

Intrinsic clearance: 0.3925  $\mu\text{L}/\text{min}/\text{mg}$

Metabolic Rate: 7.85 nmol/min/mg

% remaining at 60 min:  $77.7 \pm 0.10$  %

# Human Liver Microsomal Assay

Principal Investigator: Dr. Alexander Arnold

Operator: Revathi Kodali

Test Compound: **8k**

Concentration: 10  $\mu$ M

Date: 05-11-2016

Facility: Milwaukee Institute for Drug Discovery

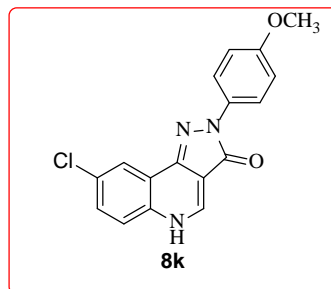

## Assay Protocol

Each evaluation included six independent assays carried out three at a time, on two different days

1. Preparation of solutions:
  - a. 1 mM test compound in DMSO.
  - b. 1  $\mu$ M 4,5 Di Phenyl Imidazole in ice cold Acetonitrile (ISTD).
2. For a total volume of Microsomal Assay Mixture (MAM) 390  $\mu$ L, sufficient for seven time points, combine the following
  - a. 282  $\mu$ L of 18.2 m $\Omega$  of water.
  - b. 80  $\mu$ L of 0.5 M potassium phosphate buffer (p<sup>H</sup> 7.4)
  - c. 20  $\mu$ L of NADPH A. (Corning life sciences, Cat # 451220)
  - d. 4  $\mu$ L of NADPH B. (Corning life sciences, Cat # 451200)
  - e. 4  $\mu$ L of test compound.
3. Sonicate MAM for 5 min and meanwhile thaw microsomes (20 mg/mL) (BD Gentest, Cat # 452156) on ice.
4. Aliquot 100  $\mu$ L of ice cold ISTD into seven separate 1.5 mL conical vials and label them the time points for 0, 10, 20, 30, 40, 50, and 60 min.
5. Arrange the timer. Microsomes (Final concentration of 0.5 mg/mL) should be added to all time points except the zero time point.
6. Add 50  $\mu$ L of the MAM solution to the conical vial labelled as zero time point. Place the remaining MAM solution in the incubator (37  $^{\circ}$ C) for 5 min and initiate the reaction with addition of microsomes (8.8  $\mu$ L) and record the time.
7. At the end of each time interval remove 50  $\mu$ L and add to 100  $\mu$ L ISTD in conical vial, sonicate for 10 sec and spin down at 10,000 rpm for 5 minutes.
8. Take 100  $\mu$ L of supernatant and transfer to Spin-X HPLC filter tubes (Corning Incorporated, Cat # 8169) and centrifuge at 13,000 rpm for 5 minutes and take 5  $\mu$ L from this solution and dilute in 495  $\mu$ L of LCMS grade methanol (Fischer scientific, CAS # 67-56-1) in a 2mL glass auto sampler vial (Microsolv, Cat # 95025-WCV)
9. The samples are analyzed by LCMS-8040. (Shimadzu)

**Data:**

Day 1:

| Time (min) | Assay 1             |                | Assay 2             |                | Assay 3             |                | % remaining |         |         |
|------------|---------------------|----------------|---------------------|----------------|---------------------|----------------|-------------|---------|---------|
|            | PZ-II-028 Peak area | ISTD Peak area | PZ-II-028 Peak area | ISTD Peak area | PZ-II-028 Peak area | ISTD Peak area | Assay 1     | Assay 2 | Assay 3 |
| 0          | 324755              | 191542         | 346172              | 193172         | 339347              | 194350         | 100.02      | 100.00  | 100.00  |
| 10         | 303291              | 193874         | 334280              | 205037         | 314958              | 188485         | 92.29       | 90.97   | 95.70   |
| 20         | 279364              | 189575         | 312886              | 197462         | 294465              | 185685         | 86.94       | 88.42   | 90.82   |
| 30         | 262109              | 190556         | 281620              | 190809         | 269697              | 189934         | 81.15       | 82.36   | 81.32   |
| 40         | 261473              | 193926         | 266162              | 185650         | 252097              | 179750         | 79.54       | 80.00   | 80.32   |
| 50         | 236291              | 183965         | 260227              | 190263         | 263532              | 199428         | 75.77       | 76.32   | 75.68   |
| 60         | 224000              | 184270         | 238445              | 182098         | 249488              | 202810         | 71.71       | 73.07   | 70.45   |

Table 1: Peak areas and % remaining values

Day 2:

| Time (min) | Assay 1             |                | Assay 2             |                | Assay 3             |                | (% remaining) |         |         |
|------------|---------------------|----------------|---------------------|----------------|---------------------|----------------|---------------|---------|---------|
|            | PZ-II-028 Peak area | ISTD Peak area | PZ-II-028 Peak area | ISTD Peak area | PZ-II-028 Peak area | ISTD Peak area | Assay 1       | Assay 2 | Assay 3 |
| 0          | 340040              | 192439         | 331759              | 189954         | 345868              | 200640         | 100.00        | 99.97   | 99.99   |
| 10         | 318242              | 195404         | 324573              | 197827         | 312513              | 192301         | 92.17         | 93.91   | 94.26   |
| 20         | 305569              | 192981         | 299895              | 188781         | 299459              | 194073         | 89.61         | 90.93   | 89.50   |
| 30         | 298265              | 197605         | 286592              | 196819         | 274487              | 192160         | 85.42         | 83.35   | 82.85   |
| 40         | 285918              | 201639         | 280896              | 200397         | 262591              | 191811         | 80.24         | 80.23   | 79.40   |
| 50         | 261825              | 192246         | 264588              | 191591         | 253613              | 189168         | 77.07         | 79.05   | 77.76   |
| 60         | 247898              | 189899         | 259822              | 195517         | 241724              | 191307         | 73.87         | 76.06   | 73.29   |

Table 2: Peak areas and % remaining values

**Calculation:**

From the peak area, Calculate the following

$$\text{Peak area ratio} = \frac{\text{Peak area of test compound (PZ-II-028)}}{\text{Peak area of internal standard (ISTD)}}$$

$$\% \text{ remaining at time T} = \frac{\text{Peak area ratio at particular time T}}{\text{Peak area ratio at zero time point}} * 100$$

(T = 0, 10, 20,30,40,50 and 60)

## DATA ANALYSIS:

### Day 1

Linear regression analysis:

Slope:  $-0.005374 \pm 0.0002025$

At X= 60, Y =  $4.269 \pm 0.007303$

$R^2 = 0.9737$

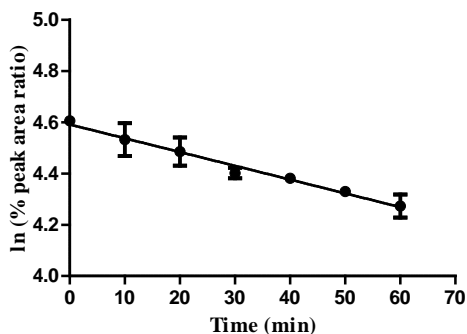

Metabolic Parameters:

Half-life:  $129 \pm 4.85$  min

$V_d$ :  $100 \mu\text{L}/\text{mg}$

Intrinsic clearance:  $0.5374 \mu\text{L}/\text{min}/\text{mg}$

Metabolic Rate:  $10.748 \text{ nmol}/\text{min}/\text{mg}$

% remaining at 60 min:  $71.45 \pm 0.12$  %

Note: The peak area ratios and natural log values are calculated using Microsoft excel 2010 and linear regression analysis is calculated using GraphPad prism.

### Day 2

Linear regression analysis:

Slope:  $-0.004882 \pm 0.0001744$

At X = 60, Y =  $4.299 \pm 0.006290$

$R^2 = 0.9763$

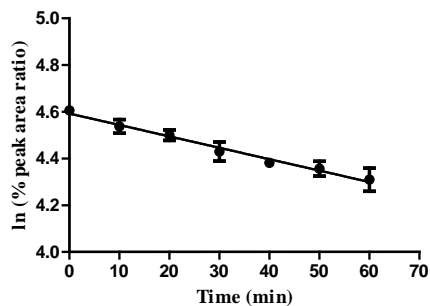

Metabolic Parameters:

Half-life:  $142 \pm 5$  min

$V_d$ :  $100 \mu\text{L}/\text{mg}$

Intrinsic clearance:  $0.4882 \mu\text{L}/\text{min}/\text{mg}$

Metabolic Rate:  $9.764 \text{ nmol}/\text{min}/\text{mg}$

% remaining at 60 min:  $73.6 \pm 0.10$  %

# Mouse Liver Microsomal Assay

Principal Investigator: Dr. Alexander Arnold

Operator: Revathi Kodali

Test Compound: **8k**

Concentration: 10  $\mu$ M

Date: 05-11-2016

Facility: Milwaukee Institute for Drug Discovery

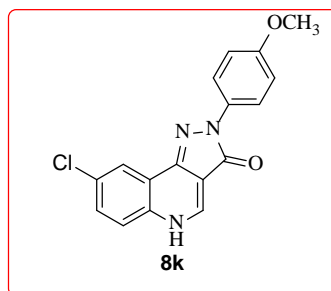

## Assay Protocol

Each evaluation included six independent assays carried out three at a time, on two different days

- Preparation of solutions:
  - 1 mM test compound in DMSO.
  - 1  $\mu$ M 4,5 Di Phenyl Imidazole in ice cold Acetonitrile (ISTD).
- For a total volume of Microsomal Assay Mixture (MAM) 390  $\mu$ L, sufficient for seven time points, combine the following
  - 282  $\mu$ L of 18.2 m $\Omega$  of water.
  - 80  $\mu$ L of 0.5 M potassium phosphate buffer (p<sup>H</sup> 7.4)
  - 20  $\mu$ L of NADPH A. (Corning life sciences, Cat # 451220)
  - 4  $\mu$ L of NADPH B. (Corning life sciences, Cat # 451200)
  - 4  $\mu$ L of test compound.
- Sonicate MAM for 5 min and meanwhile thaw microsomes (20 mg/mL) (Life technologies, Cat # 452156) on ice.
- Aliquot 100  $\mu$ L of ice cold ISTD into seven separate 1.5 mL conical vials and label them the time points for 0, 10, 20, 30, 40, 50, and 60 min.
- Arrange the timer. Microsomes (Final concentration of 0.5 mg/mL) should be added to all time points except the zero time point.
- Add 50  $\mu$ L of the MAM solution to the conical vial labelled as zero time point. Place the remaining MAM solution in the incubator (37  $^{\circ}$ C) for 5 min and initiate the reaction with addition of microsomes (8.8  $\mu$ L) and record the time.
- At the end of each time interval remove 50  $\mu$ L and add to 100  $\mu$ L ISTD in conical vial, sonicate for 10 sec and spin down at 10,000 rpm for 5 minutes.
- Take 100  $\mu$ L of supernatant and transfer to Spin-X HPLC filter tubes (Corning Incorporated, Cat # 8169) and centrifuge at 13,000 rpm for 5 minutes and take 5  $\mu$ L from this solution and dilute in 495  $\mu$ L of LCMS grade methanol (Fischer scientific, CAS # 67-56-1) in an 2mL glass auto sampler vial (Microsolv, Cat # 95025-WCV)
- The samples are analyzed by LCMS-8040. (Shimadzu)

**Data:**

Day 1:

| Time (min) | Assay 1             |                | Assay 2             |                | Assay 3             |                | % remaining |         |         |
|------------|---------------------|----------------|---------------------|----------------|---------------------|----------------|-------------|---------|---------|
|            | PZ-II-028 Peak area | ISTD Peak area | PZ-II-028 Peak area | ISTD Peak area | PZ-II-028 Peak area | ISTD Peak area | Assay 1     | Assay 2 | Assay 3 |
| 0          | 366061              | 199827         | 336466              | 199039         | 337673              | 194171         | 99.99       | 100.02  | 100.00  |
| 10         | 354142              | 209737         | 307305              | 201713         | 319153              | 196427         | 92.16       | 90.14   | 93.43   |
| 20         | 304089              | 196538         | 280904              | 200559         | 304912              | 203823         | 84.45       | 82.87   | 86.02   |
| 30         | 289982              | 197643         | 269131              | 194897         | 289487              | 198575         | 80.08       | 81.70   | 83.83   |
| 40         | 272301              | 194366         | 254952              | 193436         | 270560              | 199235         | 76.47       | 77.98   | 78.09   |
| 50         | 261248              | 192467         | 244954              | 194893         | 259999              | 196266         | 74.09       | 74.37   | 76.17   |
| 60         | 243264              | 198621         | 224892              | 194818         | 226288              | 196987         | 66.85       | 68.30   | 66.05   |

Table 1: Peak areas and % remaining values

Day 2:

| Time (min) | Assay 1             |                | Assay 2             |                | Assay 3             |                | (% remaining) |         |         |
|------------|---------------------|----------------|---------------------|----------------|---------------------|----------------|---------------|---------|---------|
|            | PZ-II-028 Peak area | ISTD Peak area | PZ-II-028 Peak area | ISTD Peak area | PZ-II-028 Peak area | ISTD Peak area | Assay 1       | Assay 2 | Assay 3 |
| 0          | 343831              | 194879         | 339147              | 198969         | 346744              | 205015         | 100.01        | 99.97   | 100.01  |
| 10         | 323549              | 200214         | 312795              | 193433         | 313614              | 199614         | 91.61         | 94.84   | 92.91   |
| 20         | 308786              | 196656         | 297763              | 196507         | 289897              | 192823         | 89.01         | 88.87   | 88.90   |
| 30         | 294808              | 196426         | 288071              | 200701         | 288541              | 202020         | 85.08         | 84.18   | 84.46   |
| 40         | 281641              | 198577         | 271681              | 201071         | 264187              | 195683         | 80.40         | 79.24   | 79.83   |
| 50         | 270456              | 199404         | 264391              | 197514         | 257406              | 198739         | 76.88         | 78.51   | 76.59   |
| 60         | 237481              | 198225         | 230209              | 198359         | 220656              | 197443         | 67.91         | 68.06   | 66.08   |

Table 2: Peak areas and % remaining values

**Calculation:**

From the peak area, Calculate the following

$$\text{Peak area ratio} = \frac{\text{Peak area of test compound (PZ-II-028)}}{\text{Peak area of internal standard (ISTD)}}$$

$$\% \text{ remaining at time T} = \frac{\text{Peak area ratio at particular time T}}{\text{Peak area ratio at zero time point}} * 100$$

(T = 0, 10, 20,30,40,50 and 60)

## DATA ANALYSIS:

### Day 1

Linear regression analysis:

Slope:  $-0.006044 \pm 0.0002685$

At X= 60, Y =  $4.224 \pm 0.009680$

$R^2 = 0.9639$

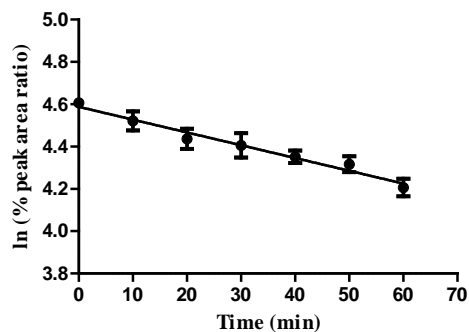

### Day 2

Linear regression analysis:

Slope:  $-0.005946 \pm 0.0002748$

At X = 60, Y =  $4.251 \pm 0.009908$

$R^2 = 0.9610$

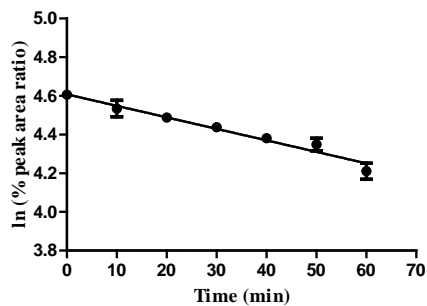

Metabolic Parameters:

Half-life:  $114.65 \pm 5$  min

$V_d$ : 100  $\mu$ L/mg

Intrinsic clearance: 0.6044  $\mu$ L/min/mg

Metabolic Rate: 12.088 nmol/min/mg

% remaining at 60 min:  $68.30 \pm 0.15$  %

Metabolic Parameters:

Half-life:  $116.54 \pm 5$  min

$V_d$ : 100  $\mu$ L/mg

Intrinsic clearance: 0.5946  $\mu$ L/min/mg

Metabolic Rate: 11.892 nmol/min/mg

% remaining at 60 min:  $70.17 \pm 0.16$  %

Note: The peak area ratios and natural log values are calculated using Microsoft excel 2010 and linear regression analysis is calculated using GraphPad prism.

# Human Liver Microsomal Assay

Principal Investigator: Dr. Alexander Arnold

Operator: Revathi Kodali

Test Compound: **8I**

Concentration: 10  $\mu$ M

Date: 05-11-2016

Facility: Milwaukee Institute for Drug Discovery

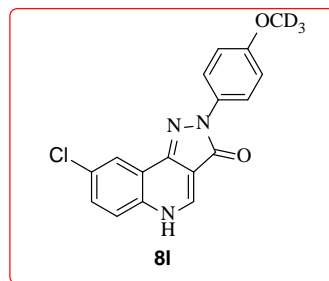

## Assay Protocol

Each evaluation included six independent assays carried out three at a time, on two different days

- Preparation of solutions:
  - 1 mM test compound in DMSO.
  - 1  $\mu$ M 4,5 Di Phenyl Imidazole in ice cold Acetonitrile (ISTD).
- For a total volume of Microsomal Assay Mixture (MAM) 390  $\mu$ L, sufficient for seven time points, combine the following
  - 282  $\mu$ L of 18.2 m $\Omega$  of water.
  - 80  $\mu$ L of 0.5 M potassium phosphate buffer (pH 7.4)
  - 20  $\mu$ L of NADPH A. (Corning life sciences, Cat # 451220)
  - 4  $\mu$ L of NADPH B. (Corning life sciences, Cat # 451200)
  - 4  $\mu$ L of test compound.
- Sonicate MAM for 5 min and meanwhile thaw microsomes (20 mg/mL) (BD Gentest, Cat # 452156) on ice.
- Aliquot 100  $\mu$ L of ice cold ISTD into seven separate 1.5 mL conical vials and label them the time points for 0, 10, 20, 30, 40, 50, and 60 min.
- Arrange the timer. Microsomes (Final concentration of 0.5 mg/mL) should be added to all time points except the zero time point.
- Add 50  $\mu$ L of the MAM solution to the conical vial labelled as zero time point. Place the remaining MAM solution in the incubator (37  $^{\circ}$ C) for 5 min and initiate the reaction with addition of microsomes (8.8  $\mu$ L) and record the time.
- At the end of each time interval remove 50  $\mu$ L and add to 100  $\mu$ L ISTD in conical vial, sonicate for 10 sec and spin down at 10,000 rpm for 5 minutes.
- Take 100  $\mu$ L of supernatant and transfer to Spin-X HPLC filter tubes (Corning Incorporated, Cat # 8169) and centrifuge at 13,000 rpm for 5 minutes and take 5  $\mu$ L from this solution and dilute in 495  $\mu$ L of LCMS grade methanol (Fischer scientific, CAS # 67-56-1) in a 2mL glass auto sampler vial (Microsolv, Cat # 95025-WCV)
- The samples are analyzed by LCMS-8040. (Shimadzu)



**Data:**

Day 1:

| Time (min) | Assay 1             |                | Assay 2             |                | Assay 3             |                | % remaining |         |         |
|------------|---------------------|----------------|---------------------|----------------|---------------------|----------------|-------------|---------|---------|
|            | DK-I-93-1 Peak area | ISTD Peak area | DK-I-93-1 Peak area | ISTD Peak area | DK-I-93-1 Peak area | ISTD Peak area | Assay 1     | Assay 2 | Assay 3 |
| 0          | 250625              | 192387         | 237170              | 198327         | 234647              | 199878         | 99.97       | 99.98   | 99.99   |
| 10         | 242335              | 189302         | 224245              | 189872         | 225979              | 200083         | 98.24       | 98.74   | 96.20   |
| 20         | 238422              | 192987         | 232415              | 201838         | 222414              | 198723         | 94.81       | 96.27   | 95.33   |
| 30         | 238094              | 194382         | 225682              | 200982         | 220003              | 197823         | 94.00       | 93.88   | 94.72   |
| 40         | 223222              | 189899         | 217775              | 197267         | 216509              | 198727         | 90.21       | 92.30   | 92.80   |
| 50         | 227512              | 190923         | 213875              | 189283         | 206397              | 189982         | 91.45       | 94.47   | 92.53   |
| 60         | 243612              | 200837         | 217353              | 189231         | 213670              | 189238         | 93.09       | 96.03   | 96.17   |

Table 1: Peak areas and % remaining values

Day 2:

| Time (min) | Assay 1             |                | Assay 2             |                | Assay 3             |                | (% remaining) |         |         |
|------------|---------------------|----------------|---------------------|----------------|---------------------|----------------|---------------|---------|---------|
|            | DK-I-93-1 Peak area | ISTD Peak area | DK-I-93-1 Peak area | ISTD Peak area | DK-I-93-1 Peak area | ISTD Peak area | Assay 1       | Assay 2 | Assay 3 |
| 0          | 232555              | 181934         | 254844              | 198536         | 235043              | 183806         | 100.01        | 99.97   | 99.98   |
| 10         | 231871              | 188134         | 242801              | 189616         | 239432              | 190946         | 96.43         | 99.72   | 98.03   |
| 20         | 230713              | 189672         | 241871              | 199585         | 235141              | 194722         | 95.17         | 94.38   | 94.41   |
| 30         | 229991              | 194398         | 231837              | 187871         | 217874              | 183237         | 92.57         | 96.10   | 92.96   |
| 40         | 217135              | 179986         | 229810              | 188630         | 229989              | 192164         | 94.39         | 94.88   | 93.57   |
| 50         | 214187              | 180515         | 236366              | 193786         | 230808              | 196736         | 92.84         | 94.99   | 91.72   |
| 60         | 239230              | 196288         | 209997              | 177296         | 220264              | 186986         | 95.36         | 92.24   | 92.10   |

Table 2: Peak areas and % remaining values

**Calculation:**

From the peak area, Calculate the following

$$\text{Peak area ratio} = \frac{\text{Peak area of test compound (DK-I-93-1)}}{\text{Peak area of internal standard (ISTD)}}$$

$$\% \text{ remaining at time T} = \frac{\text{Peak area ratio at particular time T}}{\text{Peak area ratio at zero time point}} * 100$$

(T = 0, 10, 20,30,40,50 and 60)

## DATA ANALYSIS:

### Day 1

Linear regression analysis:

Slope:  $-0.001044 \pm 0.0002330$

At X= 60, Y =  $4.525 \pm 0.008401$

$R^2 = 0.5138$

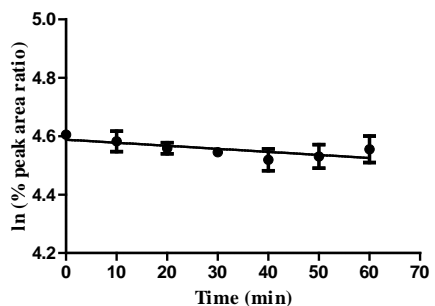

### Day 2

Linear regression analysis:

Slope:  $-0.001125 \pm 0.0001897$

At X = 60, Y =  $4.523 \pm 0.006839$

$R^2 = 0.6493$

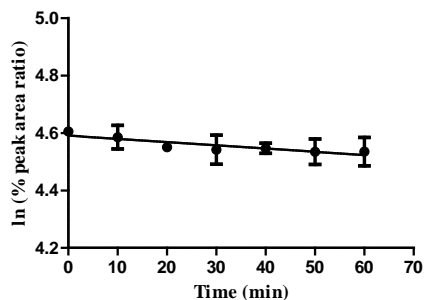

Metabolic Parameters:

Half-life:  $663.8 \pm 148$  min

$V_d$ :  $100 \mu\text{L}/\text{mg}$

Intrinsic clearance:  $0.1044 \mu\text{L}/\text{min}/\text{mg}$

Metabolic Rate:  $2.088 \text{ nmol}/\text{min}/\text{mg}$

% remaining at 60 min:  $92.29 \pm 0.17$  %

Metabolic Parameters:

Half-life:  $616 \pm 103.87$  min

$V_d$ :  $100 \mu\text{L}/\text{mg}$

Intrinsic clearance:  $0.1125 \mu\text{L}/\text{min}/\text{mg}$

Metabolic Rate:  $2.25 \text{ nmol}/\text{min}/\text{mg}$

% remaining at 60 min:  $92.11 \pm 0.13$  %

Note: The peak area ratios and natural log values are calculated using Microsoft excel 2010 and linear regression analysis is calculated using GraphPad prism.

# Mouse Liver Microsomal Assay

Principal Investigator: Dr. Alexander Arnold

Operator: Revathi Kodali

Test Compound: **8I**

Concentration: 10  $\mu\text{M}$

Date: 05-11-2016

Facility: Milwaukee Institute for Drug Discovery

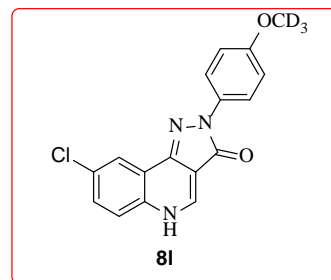

## Assay Protocol

Each evaluation included six independent assays carried out three at a time, on two different days

- Preparation of solutions:
  - 1 mM test compound in DMSO.
  - 1  $\mu\text{M}$  4,5 Di Phenyl Imidazole in ice cold Acetonitrile (ISTD).
- For a total volume of Microsomal Assay Mixture (MAM) 390  $\mu\text{L}$ , sufficient for seven time points, combine the following
  - 282  $\mu\text{L}$  of 18.2 m $\Omega$  of water.
  - 80  $\mu\text{L}$  of 0.5 M potassium phosphate buffer (pH 7.4)
  - 20  $\mu\text{L}$  of NADPH A. (Corning life sciences, Cat # 451220)
  - 4  $\mu\text{L}$  of NADPH B. (Corning life sciences, Cat # 451200)
  - 4  $\mu\text{L}$  of test compound.
- Sonicate MAM for 5 min and meanwhile thaw microsomes (20 mg/mL) (Life technologies, Cat # MSMC-PL) on ice.
- Aliquot 100  $\mu\text{L}$  of ice cold ISTD into seven separate 1.5 mL conical vials and label them the time points for 0, 10, 20, 30, 40, 50, and 60 min.
- Arrange the timer. Microsomes (Final concentration of 0.5 mg/mL) should be added to all time points except the zero time point.
- Add 50  $\mu\text{L}$  of the MAM solution to the conical vial labelled as zero time point. Place the remaining MAM solution in the incubator (37  $^{\circ}\text{C}$ ) for 5 min and initiate the reaction with addition of microsomes (8.8  $\mu\text{L}$ ) and record the time.
- At the end of each time interval remove 50  $\mu\text{L}$  and add to 100  $\mu\text{L}$  ISTD in conical vial, sonicate for 10 sec and spin down at 10,000 rpm for 5 minutes.
- Take 100  $\mu\text{L}$  of supernatant and transfer to Spin-X HPLC filter tubes (Corning Incorporated, Cat # 8169) and centrifuge at 13,000 rpm for 5 minutes and take 5  $\mu\text{L}$  from this solution and dilute in 495  $\mu\text{L}$  of LCMS grade methanol (Fischer scientific, CAS # 67-56-1) in an 2mL glass auto sampler vial (Microsolv, Cat # 95025-WCV)
- The samples are analyzed by LCMS-8040. (Shimadzu)

**Data:**

Day 1:

| Time (min) | Assay 1             |                | Assay 2             |                | Assay 3             |                | % remaining |         |         |
|------------|---------------------|----------------|---------------------|----------------|---------------------|----------------|-------------|---------|---------|
|            | DK-I-93-1 Peak area | ISTD Peak area | DK-I-93-1 Peak area | ISTD Peak area | DK-I-93-1 Peak area | ISTD Peak area | Assay 1     | Assay 2 | Assay 3 |
| 0          | 247869              | 200832         | 242560              | 198728         | 240012              | 200383         | 100.01      | 99.96   | 99.98   |
| 10         | 241961              | 198938         | 229981              | 189972         | 228890              | 192038         | 98.56       | 99.14   | 99.49   |
| 20         | 219944              | 189239         | 219837              | 190398         | 227377              | 198723         | 94.18       | 94.56   | 95.50   |
| 30         | 219892              | 192783         | 223091              | 198289         | 222356              | 199873         | 92.43       | 92.14   | 92.86   |
| 40         | 215733              | 190283         | 223609              | 199089         | 202388              | 187327         | 91.87       | 91.98   | 90.18   |
| 50         | 217308              | 200038         | 210655              | 198289         | 201168              | 193989         | 88.03       | 87.00   | 86.56   |
| 60         | 210081              | 198238         | 199705              | 190098         | 197997              | 199723         | 85.87       | 86.03   | 82.75   |

Table 1: Peak areas and % remaining values

Day 2:

| Time (min) | Assay 1             |                | Assay 2             |                | Assay 3              |                | (% remaining) |         |         |
|------------|---------------------|----------------|---------------------|----------------|----------------------|----------------|---------------|---------|---------|
|            | DK-I-93-1 Peak area | ISTD Peak area | DK-I-93-1 Peak area | ISTD Peak area | DK-II-93-1 Peak area | ISTD Peak area | Assay 1       | Assay 2 | Assay 3 |
| 0          | 223619              | 198287         | 256949              | 198289         | 230099               | 200812         | 99.97         | 99.98   | 99.98   |
| 10         | 216310              | 198732         | 253937              | 200198         | 222023               | 199128         | 96.49         | 97.87   | 97.29   |
| 20         | 214081              | 201832         | 243196              | 200928         | 208449               | 192983         | 94.03         | 93.39   | 94.25   |
| 30         | 211543              | 200783         | 238604              | 199289         | 210719               | 198997         | 93.40         | 92.38   | 92.40   |
| 40         | 207923              | 201838         | 235187              | 198181         | 198300               | 189877         | 91.32         | 91.56   | 91.13   |
| 50         | 197590              | 198328         | 224951              | 199823         | 201107               | 199887         | 88.32         | 86.86   | 87.79   |
| 60         | 203382              | 208278         | 213838              | 192566         | 203202               | 208787         | 86.56         | 85.68   | 84.926  |

Table 2: Peak areas and % remaining values

**Calculation:**

From the peak area, Calculate the following

$$\text{Peak area ratio} = \frac{\text{Peak area of test compound (DK-I-93-1)}}{\text{Peak area of internal standard (ISTD)}}$$

$$\% \text{ remaining at time T} = \frac{\text{Peak area ratio at particular time T}}{\text{Peak area ratio at zero time point}} * 100$$

(T = 0, 10, 20,30,40,50 and 60)

## DATA ANALYSIS:

### Day 1

Linear regression analysis:

Slope:  $-0.002795 \pm 0.0001334$

At X= 60, Y =  $4.445 \pm 0.004847$

$R^2 = 0.9579$

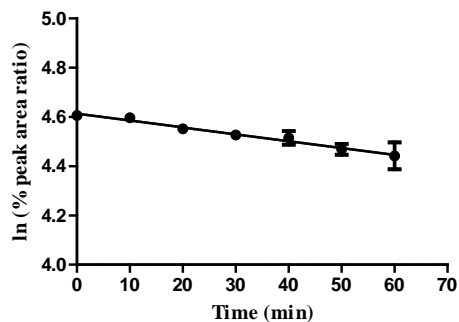

### Day 2

Linear regression analysis:

Slope:  $-0.002487 \pm 9.365e-005$

At X = 60, Y =  $4.453 \pm 0.003377$

$R^2 = 0.9738$

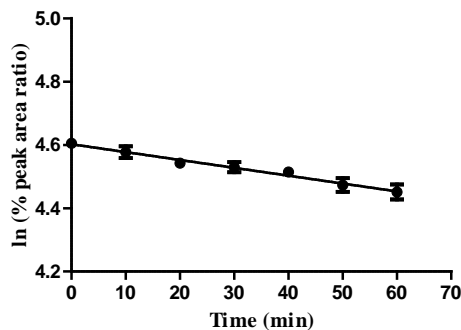

Metabolic Parameters:

Half-life:  $247.94 \pm 11.92$  min

$V_d$ : 100  $\mu$ L/mg

Intrinsic clearance: 0.2795  $\mu$ L/min/mg

Metabolic Rate: 5.59 nmol/min/mg

% remaining at 60 min:  $85.19 \pm 0.09$  %

Metabolic Parameters:

Half-life: 277.86 min

$V_d$ : 100  $\mu$ L/mg

Intrinsic clearance: 0.2494  $\mu$ L/min/mg

Metabolic Rate: 4.988 nmol/min/mg

% remaining at 60 min:  $85.88 \pm 0.06$  %

Note: The peak area ratios and natural log values are calculated using Microsoft excel 2010 and linear regression analysis is calculated using GraphPad prism.

# Human Liver Microsomal Assay

Principal Investigator: Dr. Alexander Arnold

Operator: Revathi Kodali

Test Compound: **8m**

Concentration: 10  $\mu$ M

Date: 05-31-2016

Facility: Milwaukee Institute for Drug Discovery

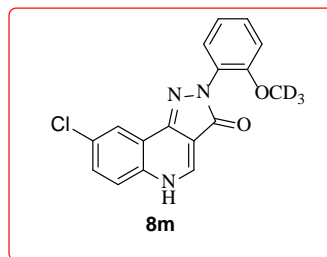

## Assay Protocol

Each evaluation included six independent assays carried out three at a time, on two different days

1. Preparation of solutions:
  - a. 1 mM test compound in DMSO.
  - b. 1  $\mu$ M 4,5 Di Phenyl Imidazole in ice cold Acetonitrile (ISTD).
2. For a total volume of Microsomal Assay Mixture (MAM) 390  $\mu$ L, sufficient for seven time points, combine the following
  - a. 282  $\mu$ L of 18.2 m $\Omega$  of water.
  - b. 80  $\mu$ L of 0.5 M potassium phosphate buffer (p<sup>H</sup> 7.4)
  - c. 20  $\mu$ L of NADPH A. (Corning life sciences, Cat # 451220)
  - d. 4  $\mu$ L of NADPH B. (Corning life sciences, Cat # 451200)
  - e. 4  $\mu$ L of test compound.
3. Sonicate MAM for 5 min and meanwhile thaw microsomes (20 mg/mL) (BD Gentest, Cat # 452156) on ice.
4. Aliquot 100  $\mu$ L of ice cold ISTD into seven separate 1.5 mL conical vials and label them the time points for 0, 10, 20, 30, 40, 50, and 60 min.
5. Arrange the timer. Microsomes (Final concentration of 0.5 mg/mL) should be added to all time points except the zero time point.
6. Add 50  $\mu$ L of the MAM solution to the conical vial labelled as zero time point. Place the remaining MAM solution in the incubator (37  $^{\circ}$ C) for 5 min and initiate the reaction with addition of microsomes (8.8  $\mu$ L) and record the time.
7. At the end of each time interval remove 50  $\mu$ L and add to 100  $\mu$ L ISTD in conical vial, sonicate for 10 sec and spin down at 10,000 rpm for 5 minutes.
8. Take 100  $\mu$ L of supernatant and transfer to Spin-X HPLC filter tubes (Corning Incorporated, Cat # 8169) and centrifuge at 13,000 rpm for 5 minutes and take 5  $\mu$ L from this solution and dilute in 495  $\mu$ L of LCMS grade methanol (Fischer scientific, CAS # 67-56-1) in an 2mL glass auto sampler vial (Microsolv, Cat # 95025-WCV)
9. The samples are analyzed by LCMS-8040. (Shimadzu)

**Data:**

Day 1:

| Time (min) | Assay 1             |                | Assay 2             |                | Assay 3             |                | % remaining |         |         |
|------------|---------------------|----------------|---------------------|----------------|---------------------|----------------|-------------|---------|---------|
|            | DK-I-87-1 Peak area | ISTD Peak area | DK-I-87-1 Peak area | ISTD Peak area | DK-I-87-1 Peak area | ISTD Peak area | Assay 1     | Assay 2 | Assay 3 |
| 0          | 3152581             | 2574057        | 3090759             | 2547745        | 3041212             | 2506826        | 99.98       | 100.01  | 100.01  |
| 10         | 2808908             | 2335235        | 2912951             | 2501008        | 3038858             | 2554152        | 98.19       | 96.01   | 98.08   |
| 20         | 2866087             | 2400484        | 2847348             | 2427550        | 3040589             | 2629818        | 97.46       | 96.69   | 95.31   |
| 30         | 2972032             | 2516908        | 2927928             | 2523366        | 2843286             | 2411572        | 96.39       | 95.65   | 97.19   |
| 40         | 2710230             | 2301818        | 2876918             | 2476615        | 2874748             | 2490507        | 96.11       | 95.76   | 95.15   |
| 50         | 2957325             | 2548271        | 2899982             | 2513844        | 2742462             | 2389247        | 94.73       | 95.10   | 94.62   |
| 60         | 2886265             | 2480002        | 2892799             | 2482830        | 2789089             | 2399249        | 95.00       | 96.05   | 95.83   |

Table 1: Peak areas and % remaining values

Day 2:

| Time (min) | Assay 1             |                | Assay 2             |                | Assay 3             |                | (% remaining) |         |         |
|------------|---------------------|----------------|---------------------|----------------|---------------------|----------------|---------------|---------|---------|
|            | DK-I-87-1 Peak area | ISTD Peak area | DK-I-87-1 Peak area | ISTD Peak area | DK-I-87-1 Peak area | ISTD Peak area | Assay 1       | Assay 2 | Assay 3 |
| 0          | 3064533             | 2514855        | 3043938             | 2506906        | 3099337             | 2509389        | 99.96         | 100.01  | 100.00  |
| 10         | 3025303             | 2515223        | 2932365             | 2477887        | 3077022             | 2522920        | 98.67         | 97.48   | 98.75   |
| 20         | 2918654             | 2479369        | 2875835             | 2458655        | 3122423             | 2592134        | 96.56         | 96.34   | 97.53   |
| 30         | 2959314             | 2499725        | 2920979             | 2521593        | 2905454             | 2453499        | 97.11         | 95.41   | 95.88   |
| 40         | 2905799             | 2468160        | 2862172             | 2445543        | 3022306             | 2568476        | 96.58         | 96.40   | 95.27   |
| 50         | 2993719             | 2551914        | 2886596             | 2500423        | 2911271             | 2452557        | 96.23         | 95.09   | 96.11   |
| 60         | 2858457             | 2445646        | 2914618             | 2493893        | 2867156             | 2457617        | 95.88         | 96.26   | 94.46   |

Table 2: Peak areas and % remaining values

**Calculation:**

From the peak area, Calculate the following

$$\text{Peak area ratio} = \frac{\text{Peak area of test compound (DK-I-87-1)}}{\text{Peak area of internal standard (ISTD)}}$$

$$\% \text{ remaining at time T} = \frac{\text{Peak area ratio at particular time T}}{\text{Peak area ratio at zero time point}} * 100$$

(T = 0, 10, 20,30,40,50 and 60)

## DATA ANALYSIS:

### Day 1

Linear regression analysis:

Slope:  $-0.0007000 \pm 0.0001150$

At X= 60, Y =  $4.550 \pm 0.004145$

$R^2 = 0.6612$

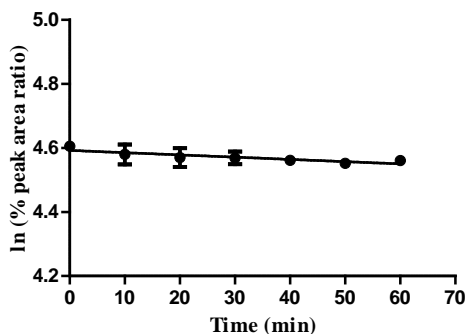

### Day 2

Linear regression analysis:

Slope:  $-0.0006988 \pm 0.0001008$

At X = 60, Y =  $4.553 \pm 0.003633$

$R^2 = 0.7168$

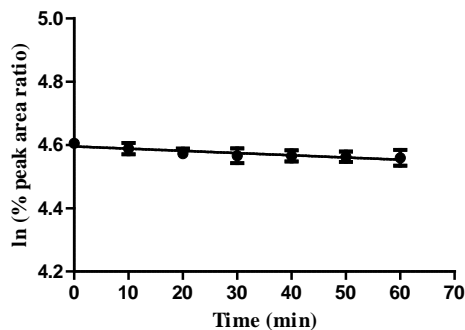

Metabolic Parameters:

Half-life:  $990 \pm 162.64$  min

$V_d$ :  $100 \mu\text{L}/\text{mg}$

Intrinsic clearance:  $0.07 \mu\text{L}/\text{min}/\text{mg}$

Metabolic Rate:  $1.4 \text{ nmol}/\text{min}/\text{mg}$

% remaining at 60 min:  $94.63 \pm 0.08$  %

Metabolic Parameters:

Half-life:  $991.70 \pm 143.05$  min

$V_d$ :  $100 \mu\text{L}/\text{mg}$

Intrinsic clearance:  $0.06988 \mu\text{L}/\text{min}/\text{mg}$

Metabolic Rate:  $1.3976 \text{ nmol}/\text{min}/\text{mg}$

% remaining at 60 min:  $94.91 \pm 0.07$  %

Note: The peak area ratios and natural log values are calculated using Microsoft excel 2010 and linear regression analysis is calculated using GraphPad prism.



# Mouse Liver Microsomal Assay

Principal Investigator: Dr. Alexander Arnold

Operator: Revathi Kodali

Test Compound: **8m**

Concentration: 10  $\mu$ M

Date: 05-31-2016

Facility: Milwaukee Institute for Drug Discovery

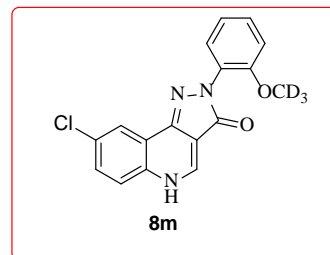

## Assay Protocol

Each evaluation included six independent assays carried out three at a time, on two different days

1. Preparation of solutions:
  - a. 1 mM test compound in DMSO.
  - b. 1  $\mu$ M 4,5 Di Phenyl Imidazole in ice cold Acetonitrile (ISTD).
2. For a total volume of Microsomal Assay Mixture (MAM) 390  $\mu$ L, sufficient for seven time points, combine the following
  - a. 282  $\mu$ L of 18.2 m $\Omega$  of water.
  - b. 80  $\mu$ L of 0.5 M potassium phosphate buffer (p<sup>H</sup> 7.4)
  - c. 20  $\mu$ L of NADPH A. (Corning life sciences, Cat # 451220)
  - d. 4  $\mu$ L of NADPH B. (Corning life sciences, Cat # 451200)
  - e. 4  $\mu$ L of test compound.
3. Sonicate MAM for 5 min and meanwhile thaw microsomes (20 mg/mL) (Life technologies, Cat # MSMC-PL) on ice.
4. Aliquot 100  $\mu$ L of ice cold ISTD into seven separate 1.5 mL conical vials and label them the time points for 0, 10, 20, 30, 40, 50, and 60 min.
5. Arrange the timer. Microsomes (Final concentration of 0.5 mg/mL) should be added to all time points except the zero time point.
6. Add 50  $\mu$ L of the MAM solution to the conical vial labelled as zero time point. Place the remaining MAM solution in the incubator (37  $^{\circ}$ C) for 5 min and initiate the reaction with addition of microsomes (8.8  $\mu$ L) and record the time.
7. At the end of each time interval remove 50  $\mu$ L and add to 100  $\mu$ L ISTD in conical vial, sonicate for 10 sec and spin down at 10,000 rpm for 5 minutes.
8. Take 100  $\mu$ L of supernatant and transfer to Spin-X HPLC filter tubes (Corning Incorporated, Cat # 8169) and centrifuge at 13,000 rpm for 5 minutes and take 5  $\mu$ L from this solution and dilute in 495  $\mu$ L of LCMS grade methanol (Fischer scientific, CAS # 67-56-1) in an 2mL glass auto sampler vial (Microsolv, Cat # 95025-WCV)
9. The samples are analyzed by LCMS-8040. (Shimadzu)

**Data:**

Day 1:

| Time (min) | Assay 1             |                | Assay 2             |                | Assay 3             |                | % remaining |         |         |
|------------|---------------------|----------------|---------------------|----------------|---------------------|----------------|-------------|---------|---------|
|            | DK-I-87-1 Peak area | ISTD Peak area | DK-I-87-1 Peak area | ISTD Peak area | DK-I-87-1 Peak area | ISTD Peak area | Assay 1     | Assay 2 | Assay 3 |
| 0          | 3010880             | 2496127        | 3000020             | 2474890        | 3119712             | 2577903        | 100.01      | 100.01  | 100.01  |
| 10         | 2919613             | 2469905        | 3060634             | 2584737        | 2940036             | 2414532        | 98.01       | 97.70   | 100.63  |
| 20         | 2877808             | 2467796        | 2948704             | 2550083        | 2891272             | 2464767        | 96.69       | 95.40   | 96.94   |
| 30         | 2949345             | 2509812        | 2864981             | 2476848        | 2814761             | 2424509        | 97.44       | 95.43   | 95.94   |
| 40         | 2874816             | 2447825        | 2859953             | 2478746        | 2787443             | 2412483        | 97.38       | 95.19   | 95.49   |
| 50         | 2823464             | 2438940        | 2907401             | 2505846        | 2929879             | 2500532        | 95.99       | 95.73   | 96.83   |
| 60         | 2868479             | 2500485        | 2916626             | 2545748        | 2888867             | 2478648        | 95.12       | 94.52   | 96.32   |

Table 1: Peak areas and % remaining values

Day 2:

| Time (min) | Assay 1             |                | Assay 2             |                | Assay 3             |                | (% remaining) |         |         |
|------------|---------------------|----------------|---------------------|----------------|---------------------|----------------|---------------|---------|---------|
|            | DK-I-87-1 Peak area | ISTD Peak area | DK-I-87-1 Peak area | ISTD Peak area | DK-I-87-1 Peak area | ISTD Peak area | Assay 1       | Assay 2 | Assay 3 |
| 0          | 3063855             | 2554326        | 3017647             | 2477860        | 3122426             | 2581928        | 100.04        | 99.98   | 100.02  |
| 10         | 3073622             | 2574381        | 3128942             | 2598728        | 2931678             | 2492897        | 99.57         | 98.85   | 97.27   |
| 20         | 2896000             | 2493902        | 3052088             | 2606005        | 2961703             | 2533688        | 96.85         | 96.15   | 96.68   |
| 30         | 2857230             | 2502888        | 2998628             | 2583360        | 3062090             | 2603003        | 95.21         | 95.29   | 97.30   |
| 40         | 2887437             | 2489385        | 2914665             | 2515120        | 2981544             | 2573374        | 96.73         | 95.14   | 95.83   |
| 50         | 2896283             | 2494688        | 2913298             | 2498493        | 2828265             | 2495987        | 96.82         | 95.73   | 93.72   |
| 60         | 2883458             | 2492776        | 2987679             | 2537837        | 2861939             | 2487628        | 96.47         | 96.65   | 95.15   |

Table 2: Peak areas and % remaining values

**Calculation:**

From the peak area, Calculate the following

$$\text{Peak area ratio} = \frac{\text{Peak area of test compound (DK-I-87-1)}}{\text{Peak area of internal standard (ISTD)}}$$

$$\% \text{ remaining at time T} = \frac{\text{Peak area ratio at particular time T}}{\text{Peak area ratio at zero time point}} * 100$$

(T = 0, 10, 20,30,40,50 and 60)

## DATA ANALYSIS:

### Day 1

Linear regression analysis:

Slope:  $-0.0007107 \pm 0.0001294$

At X= 60, Y =  $4.553 \pm 0.004665$

$R^2 = 0.6136$

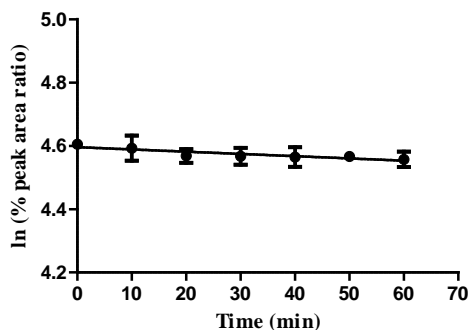

### Day 2

Linear regression analysis:

Slope:  $-0.0006857 \pm 0.0001368$

At X = 60, Y =  $4.553 \pm 0.004934$

$R^2 = 0.5692$

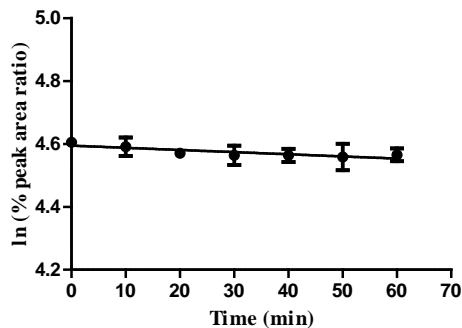

Metabolic Parameters:

Half-life:  $975.09 \pm 177.5$  min

$V_d$ :  $100 \mu\text{L}/\text{mg}$

Intrinsic clearance:  $0.07107 \mu\text{L}/\text{min}/\text{mg}$

Metabolic Rate:  $1.4214 \text{ nmol}/\text{min}/\text{mg}$

% remaining at 60 min:  $94.91 \pm 0.10$  %

Metabolic Parameters:

Half-life:  $1010.64 \pm 201.62$  min

$V_d$ :  $100 \mu\text{L}/\text{mg}$

Intrinsic clearance:  $0.06857 \mu\text{L}/\text{min}/\text{mg}$

Metabolic Rate:  $1.3714 \text{ nmol}/\text{min}/\text{mg}$

% remaining at 60 min:  $94.91 \pm 0.10$  %

Note: The peak area ratios and natural log values are calculated using Microsoft excel 2010 and linear regression analysis is calculated using GraphPad prism.

# Human Liver Microsomal Assay

Principal Investigator: Dr. Alexander Arnold

Operator: Revathi Kodali

Test Compound: **13e**

Concentration: 10  $\mu$ M

Date: 05-26-2016

Facility: Milwaukee Institute for Drug Discovery

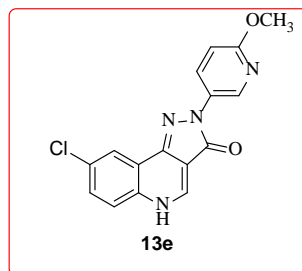

## Assay Protocol

Each evaluation included six independent assays carried out three at a time, on two different days

1. Preparation of solutions:
  - a. 1 mM test compound in DMSO.
  - b. 1  $\mu$ M 4,5 Di Phenyl Imidazole in ice cold Acetonitrile (ISTD).
2. For a total volume of Microsomal Assay Mixture (MAM) 390  $\mu$ L, sufficient for seven time points, combine the following
  - a. 282  $\mu$ L of 18.2 m $\Omega$  of water.
  - b. 80  $\mu$ L of 0.5 M potassium phosphate buffer (pH 7.4)
  - c. 20  $\mu$ L of NADPH A. (Corning life sciences, Cat # 451220)
  - d. 4  $\mu$ L of NADPH B. (Corning life sciences, Cat # 451200)
  - e. 4  $\mu$ L of test compound.
3. Sonicate MAM for 5 min and meanwhile thaw microsomes (20 mg/mL) (BD Gentest, Cat # 452156) on ice.
4. Aliquot 100  $\mu$ L of ice cold ISTD into seven separate 1.5 mL conical vials and label them the time points for 0, 10, 20, 30, 40, 50, and 60 min.
5. Arrange the timer. Microsomes (Final concentration of 0.5 mg/mL) should be added to all time points except the zero time point.
6. Add 50  $\mu$ L of the MAM solution to the conical vial labelled as zero time point. Place the remaining MAM solution in the incubator (37  $^{\circ}$ C) for 5 min and initiate the reaction with addition of microsomes (8.8  $\mu$ L) and record the time.
7. At the end of each time interval remove 50  $\mu$ L and add to 100  $\mu$ L ISTD in conical vial, sonicate for 10 sec and spin down at 10,000 rpm for 5 minutes.
8. Take 100  $\mu$ L of supernatant and transfer to Spin-X HPLC filter tubes (Corning Incorporated, Cat # 8169) and centrifuge at 13,000 rpm for 5 minutes and take 5  $\mu$ L from this solution and dilute in 495  $\mu$ L of LCMS grade methanol (Fischer scientific, CAS # 67-56-1) in an 2mL glass auto sampler vial (Microsolv, Cat # 95025-WCV)
9. The samples are analyzed by LCMS-8040. (Shimadzu)

**Data:**

Day 1:

| Time (min) | Assay 1              |                | Assay 2              |                | Assay 3              |                | % remaining |         |         |
|------------|----------------------|----------------|----------------------|----------------|----------------------|----------------|-------------|---------|---------|
|            | DK-II-18-1 Peak area | ISTD Peak area | DK-II-18-1 Peak area | ISTD Peak area | DK-II-18-1 Peak area | ISTD Peak area | Assay 1     | Assay 2 | Assay 3 |
| 0          | 5644208              | 1919825        | 5875547              | 1981129        | 5841039              | 1934689        | 99.99       | 99.99   | 100.00  |
| 10         | 5456553              | 1899842        | 5706009              | 1973504        | 5797339              | 1962833        | 97.69       | 97.48   | 97.83   |
| 20         | 5328278              | 1918500        | 5552056              | 1938966        | 5512970              | 1884596        | 94.46       | 96.54   | 96.89   |
| 30         | 5168256              | 1864504        | 5636298              | 2016714        | 5444451              | 1881687        | 94.28       | 94.22   | 95.83   |
| 40         | 5385979              | 1966025        | 5540361              | 2025809        | 5515331              | 1975225        | 93.18       | 92.20   | 92.48   |
| 50         | 5440986              | 2009443        | 5449974              | 1939177        | 5358680              | 1895764        | 92.09       | 94.75   | 93.62   |
| 60         | 5504710              | 2003905        | 5206503              | 1888636        | 5485574              | 1981129        | 93.43       | 92.94   | 91.71   |

Table 1: Peak areas and % remaining values

Day 2:

| Time (min) | Assay 1              |                | Assay 2              |                | Assay 3              |                | (% remaining) |         |         |
|------------|----------------------|----------------|----------------------|----------------|----------------------|----------------|---------------|---------|---------|
|            | DK-II-18-1 Peak area | ISTD Peak area | DK-II-18-1 Peak area | ISTD Peak area | DK-II-18-1 Peak area | ISTD Peak area | Assay 1       | Assay 2 | Assay 3 |
| 0          | 5710121              | 2003409        | 5613818              | 1965608        | 5604288              | 1995291        | 100.00        | 100.00  | 99.99   |
| 10         | 5452301              | 1929979        | 5571224              | 1958058        | 5522406              | 2000126        | 99.12         | 99.62   | 98.29   |
| 20         | 5400422              | 1918141        | 5301727              | 1920970        | 5297920              | 1926830        | 98.78         | 96.63   | 97.88   |
| 30         | 5182982              | 1899424        | 5302594              | 1936282        | 5227006              | 1955810        | 95.74         | 95.88   | 95.14   |
| 40         | 5159406              | 1912916        | 5164528              | 1949451        | 5194723              | 1988147        | 94.63         | 92.76   | 93.01   |
| 50         | 4880937              | 1855401        | 5027967              | 1935829        | 5150225              | 2000688        | 92.30         | 90.94   | 91.64   |
| 60         | 5141039              | 1926599        | 4959117              | 1880283        | 5016219              | 1915448        | 93.63         | 92.34   | 93.23   |

Table 2: Peak areas and % remaining values

**Calculation:**

From the peak area, Calculate the following

$$\text{Peak area ratio} = \frac{\text{Peak area of test compound (DK-II-18-1)}}{\text{Peak area of internal standard (ISTD)}}$$

$$\% \text{ remaining at time T} = \frac{\text{Peak area ratio at particular time T}}{\text{Peak area ratio at zero time point}} * 100$$

(T = 0, 10, 20,30,40,50 and 60)

## DATA ANALYSIS:

### Day 1

Linear regression analysis:

Slope:  $-0.001251 \pm 0.0001340$

At X= 60, Y =  $4.519 \pm 0.004832$

$R^2 = 0.8210$

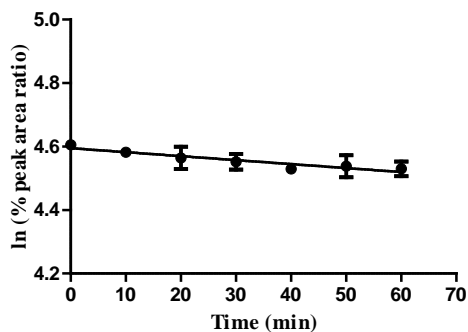

### Day 2

Linear regression analysis:

Slope:  $-0.001481 \pm 0.0001282$

At X = 60, Y =  $4.517 \pm 0.004621$

$R^2 = 0.8754$

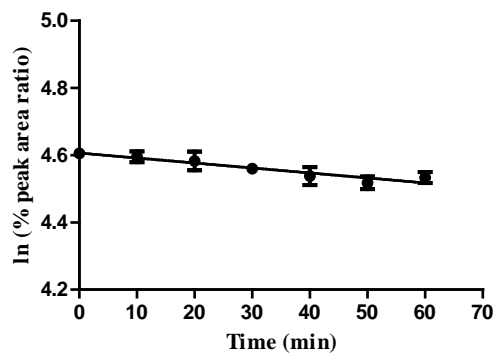

Metabolic Parameters:

Half-life:  $554 \pm 48$  min

$V_d$ :  $100 \mu\text{L}/\text{mg}$

Intrinsic clearance:  $0.1251 \mu\text{L}/\text{min}/\text{mg}$

Metabolic Rate:  $2.502 \text{ nmol}/\text{min}/\text{mg}$

% remaining at 60 min:  $91.74 \pm 0.10\%$

Metabolic Parameters:

Half-life:  $468 \pm 40$  min

$V_d$ :  $100 \mu\text{L}/\text{mg}$

Intrinsic clearance:  $0.1481 \mu\text{L}/\text{min}/\text{mg}$

Metabolic Rate:  $2.962 \text{ nmol}/\text{min}/\text{mg}$

% remaining at 60 min:  $91.56 \pm 0.10 \%$

Note: The peak area ratios and natural log values are calculated using Microsoft excel 2010 and linear regression analysis is calculated using GraphPad prism.

# Mouse Liver Microsomal Assay

Principal Investigator: Dr. Alexander Arnold

Operator: Revathi Kodali

Test Compound: **13e**

Concentration: 10  $\mu\text{M}$

Date: 05-26-2016

Facility: Milwaukee Institute for Drug Discovery

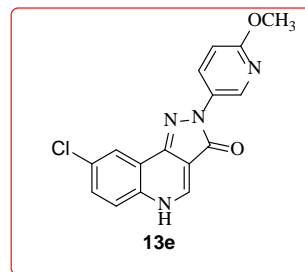

## Assay Protocol

Each evaluation included six independent assays carried out three at a time, on two different days

1. Preparation of solutions:
  - a. 1 mM test compound in DMSO.
  - b. 1  $\mu\text{M}$  4,5 Di Phenyl Imidazole in ice cold Acetonitrile (ISTD).
2. For a total volume of Microsomal Assay Mixture (MAM) 390  $\mu\text{L}$ , sufficient for seven time points, combine the following
  - a. 282  $\mu\text{L}$  of 18.2 m $\Omega$  of water.
  - b. 80  $\mu\text{L}$  of 0.5 M potassium phosphate buffer (pH 7.4)
  - c. 20  $\mu\text{L}$  of NADPH A. (Corning life sciences, Cat # 451220)
  - d. 4  $\mu\text{L}$  of NADPH B. (Corning life sciences, Cat # 451200)
  - e. 4  $\mu\text{L}$  of test compound.
3. Sonicate MAM for 5 min and meanwhile thaw microsomes (20 mg/mL) (Life technologies, Cat # MSMC-PL) on ice.
4. Aliquot 100  $\mu\text{L}$  of ice cold ISTD into seven separate 1.5 mL conical vials and label them the time points for 0, 10, 20, 30, 40, 50, and 60 min.
5. Arrange the timer. Microsomes (Final concentration of 0.5 mg/mL) should be added to all time points except the zero time point.
6. Add 50  $\mu\text{L}$  of the MAM solution to the conical vial labelled as zero time point. Place the remaining MAM solution in the incubator (37  $^{\circ}\text{C}$ ) for 5 min and initiate the reaction with addition of microsomes (8.8  $\mu\text{L}$ ) and record the time.
7. At the end of each time interval remove 50  $\mu\text{L}$  and add to 100  $\mu\text{L}$  ISTD in conical vial, sonicate for 10 sec and spin down at 10,000 rpm for 5 minutes.
8. Take 100  $\mu\text{L}$  of supernatant and transfer to Spin-X HPLC filter tubes (Corning Incorporated, Cat # 8169) and centrifuge at 13,000 rpm for 5 minutes and take 5  $\mu\text{L}$  from this solution and dilute in 495  $\mu\text{L}$  of LCMS grade methanol (Fischer scientific, CAS # 67-56-1) in a 2mL glass auto sampler vial (Microsolv, Cat # 95025-WCV)
9. The samples are analyzed by LCMS-8040. (Shimadzu)

**Data:**

Day 1:

| Time (min) | Assay 1              |                | Assay 2              |                | Assay 3              |                | % remaining |         |         |
|------------|----------------------|----------------|----------------------|----------------|----------------------|----------------|-------------|---------|---------|
|            | DK-II-18-1 Peak area | ISTD Peak area | DK-II-18-1 Peak area | ISTD Peak area | DK-II-18-1 Peak area | ISTD Peak area | Assay 1     | Assay 2 | Assay 3 |
| 0          | 4937563              | 1972562        | 5251403              | 1995612        | 5086726              | 1981323        | 100.00      | 100.01  | 100.01  |
| 10         | 4743029              | 2003783        | 5151998              | 2000212        | 5005602              | 1988213        | 94.56       | 97.89   | 98.07   |
| 20         | 4568830              | 1954232        | 5062891              | 2003111        | 4934856              | 2000123        | 93.40       | 96.06   | 96.11   |
| 30         | 4439613              | 1968634        | 4805231              | 1941987        | 4731044              | 1961422        | 90.09       | 94.04   | 93.96   |
| 40         | 4389231              | 1987724        | 4773953              | 1973222        | 4667774              | 1985162        | 88.22       | 91.95   | 91.59   |
| 50         | 4226640              | 1963123        | 4573238              | 1968173        | 4496211              | 1961134        | 86.01       | 88.31   | 89.31   |
| 60         | 4119508              | 1948631        | 4436071              | 1982333        | 4386336              | 1971123        | 84.46       | 85.05   | 86.68   |

Table 1: Peak areas and % remaining values

Day 2:

| Time (min) | Assay 1              |                | Assay 2              |                | Assay 3              |                | (% remaining) |         |         |
|------------|----------------------|----------------|----------------------|----------------|----------------------|----------------|---------------|---------|---------|
|            | DK-II-18-1 Peak area | ISTD Peak area | DK-II-18-1 Peak area | ISTD Peak area | DK-II-18-1 Peak area | ISTD Peak area | Assay 1       | Assay 2 | Assay 3 |
| 0          | 5010208              | 1974234        | 5302584              | 1989204        | 5058876              | 2000125        | 99.99         | 99.98   | 100.01  |
| 10         | 4862143              | 2001223        | 5170493              | 1956723        | 4837587              | 1939444        | 95.72         | 99.11   | 98.62   |
| 20         | 4641383              | 1962434        | 4986012              | 1922437        | 4623018              | 1914324        | 93.18         | 97.28   | 95.49   |
| 30         | 4706895              | 1962123        | 4947326              | 2004601        | 4676723              | 2000220        | 94.51         | 92.57   | 92.45   |
| 40         | 4539738              | 1981983        | 4819685              | 2000281        | 4537177              | 1921683        | 90.24         | 90.37   | 93.35   |
| 50         | 4412058              | 2002404        | 4444467              | 1945434        | 4381492              | 1963739        | 86.81         | 85.69   | 88.22   |
| 60         | 4214014              | 1934115        | 4422823              | 1981423        | 4265317              | 1944343        | 85.84         | 83.72   | 86.74   |

Table 2: Peak areas and % remaining values

**Calculation:**

From the peak area, Calculate the following

$$\text{Peak area ratio} = \frac{\text{Peak area of test compound (DK-II-18-1)}}{\text{Peak area of internal standard (ISTD)}}$$

$$\% \text{ remaining at time T} = \frac{\text{Peak area ratio at particular time T}}{\text{Peak area ratio at zero time point}} * 100$$

(T = 0, 10, 20,30,40,50 and 60)



## DATA ANALYSIS:

### Day 1

Linear regression analysis:

Slope:  $-0.002564 \pm 0.0001760$

At X= 60, Y =  $4.451 \pm 0.006346$

$R^2 = 0.9178$

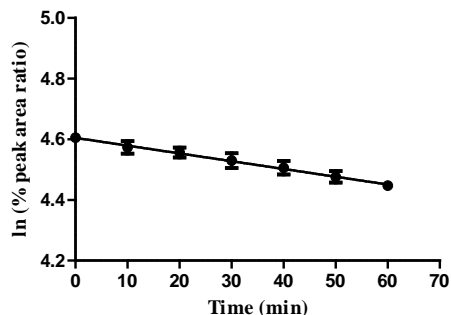

### Day 2

Linear regression analysis:

Slope:  $-0.002679 \pm 0.0001699$

At X = 60, Y =  $4.449 \pm 0.006127$

$R^2 = 0.9290$

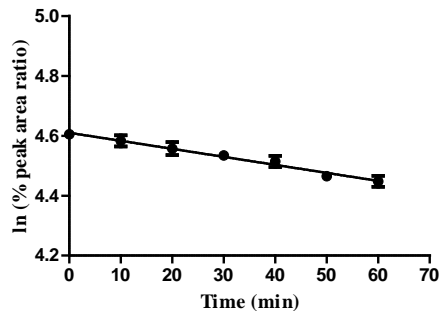

Metabolic Parameters:

Half-life:  $270.28 \pm 18.55$  min

$V_d$ :  $100 \mu\text{L}/\text{mg}$

Intrinsic clearance:  $0.2564 \mu\text{L}/\text{min}/\text{mg}$

Metabolic Rate:  $5.128 \text{ nmol}/\text{min}/\text{mg}$

% remaining at 60 min:  $85.7 \pm 0.12\%$

Metabolic Parameters:

Half-life:  $258.67 \pm 16.4$  min

$V_d$ :  $100 \mu\text{L}/\text{mg}$

Intrinsic clearance:  $0.2679 \mu\text{L}/\text{min}/\text{mg}$

Metabolic Rate:  $5.358 \text{ nmol}/\text{min}/\text{mg}$

% remaining at 60 min:  $85.54 \pm 0.11\%$

Note: The peak area ratios and natural log values are calculated using Microsoft excel 2010 and linear regression analysis is calculated using GraphPad prism.

# Human Liver Microsomal Assay

Principal Investigator: Dr. Alexander Arnold

Operator: Revathi Kodali

Test Compound: **13f**

Concentration: 10  $\mu$ M

Date: 05-11-2016

Facility: Milwaukee Institute for Drug Discovery

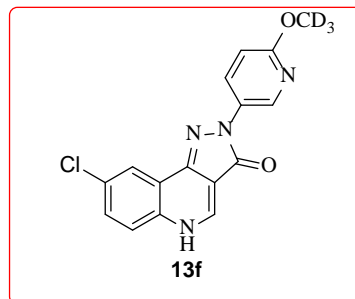

## Assay Protocol

Each evaluation included six independent assays carried out three at a time, on two different days

1. Preparation of solutions:
  - a. 1 mM test compound in DMSO.
  - b. 1  $\mu$ M 4,5 Di Phenyl Imidazole in ice cold Acetonitrile (ISTD).
2. For a total volume of Microsomal Assay Mixture (MAM) 390  $\mu$ L, sufficient for seven time points, combine the following
  - a. 282  $\mu$ L of 18.2 m $\Omega$  of water.
  - b. 80  $\mu$ L of 0.5 M potassium phosphate buffer (pH 7.4)
  - c. 20  $\mu$ L of NADPH A. (Corning life sciences, Cat # 451220)
  - d. 4  $\mu$ L of NADPH B. (Corning life sciences, Cat # 451200)
  - e. 4  $\mu$ L of test compound.
3. Sonicate MAM for 5 min and meanwhile thaw microsomes (20 mg/mL) (BD Gentest, Cat # 452156) on ice.
4. Aliquot 100  $\mu$ L of ice cold ISTD into seven separate 1.5 mL conical vials and label them the time points for 0, 10, 20, 30, 40, 50, and 60 min.
5. Arrange the timer. Microsomes (Final concentration of 0.5 mg/mL) should be added to all time points except the zero time point.
6. Add 50  $\mu$ L of the MAM solution to the conical vial labelled as zero time point. Place the remaining MAM solution in the incubator (37  $^{\circ}$ C) for 5 min and initiate the reaction with addition of microsomes (8.8  $\mu$ L) and record the time.
7. At the end of each time interval remove 50  $\mu$ L and add to 100  $\mu$ L ISTD in conical vial, sonicate for 10 sec and spin down at 10,000 rpm for 5 minutes.
8. Take 100  $\mu$ L of supernatant and transfer to Spin-X HPLC filter tubes (Corning Incorporated, Cat # 8169) and centrifuge at 13,000 rpm for 5 minutes and take 5  $\mu$ L from this solution and dilute in 495  $\mu$ L of LCMS grade methanol (Fischer scientific, CAS # 67-56-1) in a 2mL glass auto sampler vial (Microsolv, Cat # 95025-WCV)
9. The samples are analyzed by LCMS-8040. (Shimadzu)

**Data:**

Day 1:

| Time (min) | Assay 1              |                | Assay 2              |                | Assay 3              |                | % remaining |         |         |
|------------|----------------------|----------------|----------------------|----------------|----------------------|----------------|-------------|---------|---------|
|            | DK-II-59-1 Peak area | ISTD Peak area | DK-II-59-1 Peak area | ISTD Peak area | DK-II-59-1 Peak area | ISTD Peak area | Assay 1     | Assay 2 | Assay 3 |
| 0          | 3214207              | 196202         | 3239494              | 197689         | 3238583              | 200205         | 100.00      | 99.99   | 100.00  |
| 10         | 3173922              | 195337         | 3033035              | 189883         | 3108369              | 194321         | 99.18       | 97.47   | 98.88   |
| 20         | 3191550              | 200098         | 3261666              | 208782         | 3003935              | 190879         | 97.36       | 95.33   | 97.28   |
| 30         | 3099038              | 197935         | 3121234              | 200528         | 2905054              | 192940         | 95.57       | 94.98   | 93.08   |
| 40         | 2898276              | 189598         | 3008858              | 196575         | 2893897              | 189441         | 93.31       | 93.40   | 94.43   |
| 50         | 2855181              | 189062         | 3105323              | 199671         | 2992260              | 197581         | 92.18       | 94.90   | 93.62   |
| 60         | 3053840              | 200759         | 3071294              | 200786         | 2996742              | 194351         | 92.85       | 93.34   | 95.32   |

Table 1: Peak areas and % remaining values

Day 2:

| Time (min) | Assay 1              |                | Assay 2              |                | Assay 3              |                | (% remaining) |         |         |
|------------|----------------------|----------------|----------------------|----------------|----------------------|----------------|---------------|---------|---------|
|            | DK-II-59-1 Peak area | ISTD Peak area | DK-II-59-1 Peak area | ISTD Peak area | DK-II-59-1 Peak area | ISTD Peak area | Assay 1       | Assay 2 | Assay 3 |
| 0          | 3395328              | 205696         | 3206463              | 199836         | 3202311              | 199243         | 99.99         | 100.00  | 100.00  |
| 10         | 3197486              | 196263         | 3107429              | 195452         | 2971772              | 189697         | 98.69         | 99.08   | 97.47   |
| 20         | 2980275              | 190238         | 2969809              | 189676         | 3060284              | 199223         | 94.90         | 97.58   | 95.57   |
| 30         | 2995384              | 192622         | 3081130              | 201603         | 2942815              | 196349         | 94.20         | 95.25   | 93.25   |
| 40         | 2963889              | 191551         | 2906813              | 196822         | 3090401              | 201279         | 93.73         | 92.04   | 95.53   |
| 50         | 3237009              | 207483         | 2995395              | 199070         | 3007720              | 198190         | 94.51         | 93.78   | 94.42   |
| 60         | 3179593              | 200002         | 3092217              | 199044         | 2949833              | 192390         | 96.30         | 96.82   | 95.39   |

Table 2: Peak areas and % remaining values

**Calculation:**

From the peak area, Calculate the following

$$\text{Peak area ratio} = \frac{\text{Peak area of test compound (DK-II-59-1)}}{\text{Peak area of internal standard (ISTD)}}$$

$$\% \text{ remaining at time T} = \frac{\text{Peak area ratio at particular time T}}{\text{Peak area ratio at zero time point}} * 100$$

(T = 0, 10, 20,30,40,50 and 60)

## DATA ANALYSIS:

### Day 1

Linear regression analysis:

Slope:  $-0.0001161 \pm 0.0001473$

At X= 60, Y =  $4.527 \pm 0.005309$

$R^2 = 0.7658$

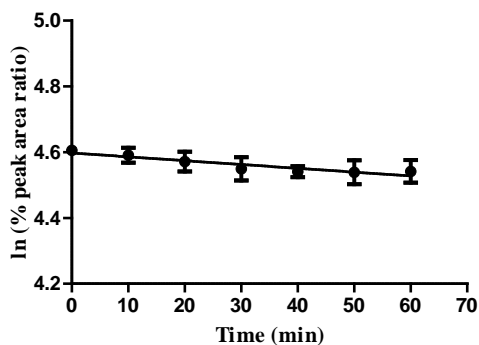

Metabolic Parameters:

Half-life:  $596.89 \pm 75.73$  min

$V_d$ : 100  $\mu\text{L}/\text{mg}$

Intrinsic clearance: 0.1161  $\mu\text{L}/\text{min}/\text{mg}$

Metabolic Rate: 2.322 nmol/min/mg

% remaining at 60 min:  $92.4 \pm 0.10$  %

Note: The peak area ratios and natural log values are calculated using Microsoft excel 2010 and linear regression analysis is calculated using GraphPad prism.

### Day 2

Linear regression analysis:

Slope:  $-0.0008107 \pm 0.0002054$

At X = 60, Y =  $4.541 \pm 0.007406$

$R^2 = 0.4505$

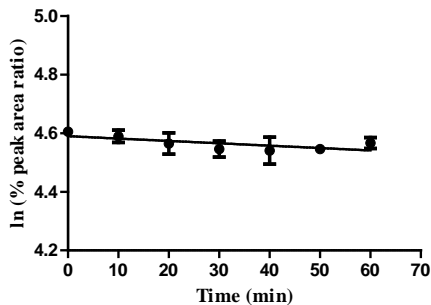

Metabolic Parameters:

Half-life:  $854.81 \pm 216.57$  min

$V_d$ : 100  $\mu\text{L}/\text{mg}$

Intrinsic clearance: 0.08107  $\mu\text{L}/\text{min}/\text{mg}$

Metabolic Rate: 1.6214 nmol/min/mg

% remaining at 60 min:  $93.78 \pm 0.15$  %

# Mouse Liver Microsomal Assay

Principal Investigator: Dr. Alexander Arnold

Operator: Revathi Kodali

Test Compound: **13f**

Concentration: 10  $\mu$ M

Date: 05-11-2016

Facility: Milwaukee Institute for Drug Discovery

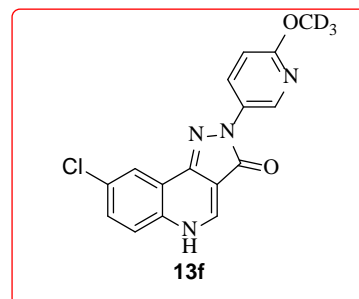

## Assay Protocol

Each evaluation included six independent assays carried out three at a time, on two different days

1. Preparation of solutions:
  - a. 1 mM test compound in DMSO.
  - b. 1  $\mu$ M 4,5 Di Phenyl Imidazole in ice cold Acetonitrile (ISTD).
2. For a total volume of Microsomal Assay Mixture (MAM) 390  $\mu$ L, sufficient for seven time points, combine the following
  - a. 282  $\mu$ L of 18.2 m $\Omega$  of water.
  - b. 80  $\mu$ L of 0.5 M potassium phosphate buffer (pH 7.4)
  - c. 20  $\mu$ L of NADPH A. (Corning life sciences, Cat # 451220)
  - d. 4  $\mu$ L of NADPH B. (Corning life sciences, Cat # 451200)
  - e. 4  $\mu$ L of test compound.
3. Sonicate MAM for 5 min and meanwhile thaw microsomes (20 mg/mL) (Life technologies, Cat # MSMC-PL) on ice.
4. Aliquot 100  $\mu$ L of ice cold ISTD into seven separate 1.5 mL conical vials and label them the time points for 0, 10, 20, 30, 40, 50, and 60 min.
5. Arrange the timer. Microsomes (Final concentration of 0.5 mg/mL) should be added to all time points except the zero time point.
6. Add 50  $\mu$ L of the MAM solution to the conical vial labelled as zero time point. Place the remaining MAM solution in the incubator (37  $^{\circ}$ C) for 5 min and initiate the reaction with addition of microsomes (8.8  $\mu$ L) and record the time.
7. At the end of each time interval remove 50  $\mu$ L and add to 100  $\mu$ L ISTD in conical vial, sonicate for 10 sec and spin down at 10,000 rpm for 5 minutes.
8. Take 100  $\mu$ L of supernatant and transfer to Spin-X HPLC filter tubes (Corning Incorporated, Cat # 8169) and centrifuge at 13,000 rpm for 5 minutes and take 5  $\mu$ L from this solution and dilute in 495  $\mu$ L of LCMS grade methanol (Fischer scientific, CAS # 67-56-1) in a 2mL glass auto sampler vial (Microsolv, Cat # 95025-WCV)
9. The samples are analyzed by LCMS-8040. (Shimadzu)

**Data:**

Day 1:

| Time (min) | Assay 1              |                | Assay 2              |                | Assay 3              |                | % remaining |         |         |
|------------|----------------------|----------------|----------------------|----------------|----------------------|----------------|-------------|---------|---------|
|            | DK-II-59-1 Peak area | ISTD Peak area | DK-II-59-1 Peak area | ISTD Peak area | DK-II-59-1 Peak area | ISTD Peak area | Assay 1     | Assay 2 | Assay 3 |
| 0          | 3434185              | 199292         | 3403798              | 199962         | 3467119              | 198537         | 100.00      | 100.00  | 100.00  |
| 10         | 3261135              | 192712         | 3308124              | 200914         | 3316748              | 193077         | 98.20       | 96.73   | 98.37   |
| 20         | 3277305              | 198836         | 3252309              | 201825         | 3294910              | 194431         | 95.65       | 94.66   | 97.04   |
| 30         | 3195052              | 200928         | 3204258              | 202859         | 3226537              | 202460         | 92.27       | 92.79   | 91.26   |
| 40         | 3116114              | 198399         | 3109879              | 202925         | 3283568              | 207620         | 91.14       | 90.03   | 90.56   |
| 50         | 3075182              | 199859         | 2943205              | 199172         | 3189757              | 206428         | 89.29       | 86.81   | 88.48   |
| 60         | 2962666              | 201067         | 2891865              | 203629         | 2942467              | 196355         | 85.50       | 83.43   | 85.81   |

Table 1: Peak areas and % remaining values

Day 2:

| Time (min) | Assay 1              |                | Assay 2              |                | Assay 3              |                | (% remaining) |         |         |
|------------|----------------------|----------------|----------------------|----------------|----------------------|----------------|---------------|---------|---------|
|            | DK-II-59-1 Peak area | ISTD Peak area | DK-II-59-1 Peak area | ISTD Peak area | DK-II-59-1 Peak area | ISTD Peak area | Assay 1       | Assay 2 | Assay 3 |
| 0          | 3272456              | 203581         | 3398083              | 203758         | 3394417              | 199950         | 100.00        | 100.00  | 100.00  |
| 10         | 3194621              | 200636         | 3224902              | 198751         | 3152045              | 190949         | 99.05         | 97.29   | 97.23   |
| 20         | 3118089              | 199275         | 3116033              | 200838         | 3175198              | 198429         | 97.34         | 93.03   | 94.26   |
| 30         | 3030724              | 196565         | 3012793              | 200320         | 3136068              | 198920         | 95.92         | 90.18   | 92.86   |
| 40         | 2867077              | 195909         | 2931859              | 199978         | 3054711              | 193801         | 91.04         | 87.91   | 92.84   |
| 50         | 2812061              | 200539         | 2890102              | 197907         | 2933773              | 200393         | 87.23         | 87.56   | 86.24   |
| 60         | 2718349              | 203636         | 2806729              | 199949         | 2908503              | 200605         | 83.04         | 84.17   | 85.40   |

Table 2: Peak areas and % remaining values

**Calculation:**

From the peak area, Calculate the following

$$\text{Peak area ratio} = \frac{\text{Peak area of test compound (DK-II-59-1)}}{\text{Peak area of internal standard (ISTD)}}$$

$$\% \text{ remaining at time T} = \frac{\text{Peak area ratio at particular time T}}{\text{Peak area ratio at zero time point}} * 100$$

(T = 0, 10, 20,30,40,50 and 60)

## DATA ANALYSIS:

### Day 1

Linear regression analysis:

Slope:  $-0.002686 \pm 0.0001145$

At X= 60, Y =  $4.448 \pm 0.004129$

$R^2 = 0.9666$

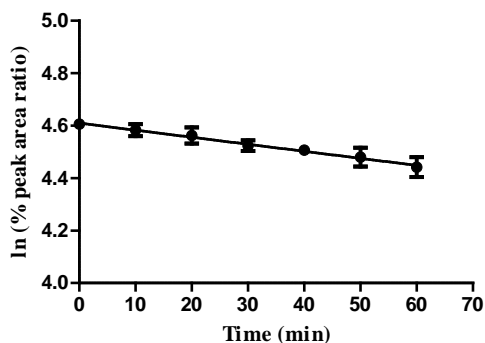

### Day 2

Linear regression analysis:

Slope:  $-0.002849 \pm 0.0001933$

At X = 60, Y =  $4.440 \pm 0.006969$

$R^2 = 0.9196$

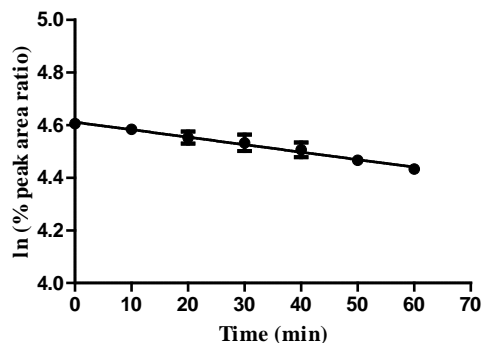

Metabolic Parameters:

Half-life:  $258.004 \pm 10.99$  min

$V_d$ : 100  $\mu$ L/mg

Intrinsic clearance: 0.2686  $\mu$ L/min/mg

Metabolic Rate: 5.372 nmol/min/mg

% remaining at 60 min:  $85.45 \pm 0.07$  %

Metabolic Parameters:

Half-life:  $243.24 \pm 16.5$  min

$V_d$ : 100  $\mu$ L/mg

Intrinsic clearance: 0.2849  $\mu$ L/min/mg

Metabolic Rate: 5.698 nmol/min/mg

% remaining at 60 min:  $84.77 \pm 0.13$  %

Note: The peak area ratios and natural log values are calculated using Microsoft excel 2010 and linear regression analysis is calculated using GraphPad prism.

# Human Liver Microsomal Assay

Principal Investigator: Dr. Alexander Arnold

Operator: Revathi Kodali

Test Compound: **8n**

Concentration: 10  $\mu$ M

Date: 04-13-2016

Facility: Milwaukee Institute for Drug Discovery

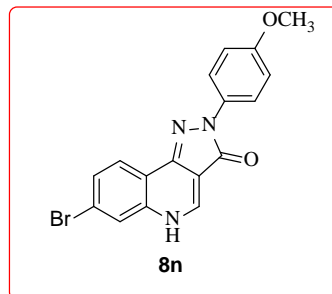

## Assay Protocol

Each evaluation included six independent assays carried out three at a time, on two different days

1. Preparation of solutions:
  - a. 1 mM test compound in DMSO.
  - b. 0.5  $\mu$ M 4,5 Diphenyl Imidazole in ice cold Acetonitrile (ISTD).
2. For a total volume of Microsomal Assay Mixture (MAM) 390  $\mu$ L, sufficient for seven time points, combine the following
  - a. 282  $\mu$ L of 18.2 m $\Omega$  of water.
  - b. 80  $\mu$ L of 0.5 M potassium phosphate buffer (p<sup>H</sup> 7.4)
  - c. 20  $\mu$ L of NADPH A. (Corning life sciences, Cat # 451220)
  - d. 4  $\mu$ L of NADPH B. (Corning life sciences, Cat # 451200)
  - e. 4  $\mu$ L of test compound.
3. Sonicate MAM for 5 min and meanwhile thaw microsomes (20 mg/mL) (BD Gentest, Cat # 452156) on ice.
4. Aliquot 100  $\mu$ L of ice cold ISTD into seven separate 1.5 mL conical vials and label them the time points for 0, 10, 20, 30, 40, 50, and 60 min.
5. Arrange the timer. Microsomes (Final concentration of 0.5 mg/mL) should be added to all time points except the zero time point.
6. Add 50  $\mu$ L of the MAM solution to the conical vial labelled as zero time point. Place the remaining MAM solution in the incubator (37 °C) for 5 min and initiate the reaction with addition of microsomes (8.8  $\mu$ L) and record the time.
7. At the end of each time interval remove 50  $\mu$ L and add to 100  $\mu$ L ISTD in conical vial, sonicate for 10 sec and spin down at 10,000 rpm for 5 minutes.
8. Take 100  $\mu$ L of supernatant and transfer to Spin-X HPLC filter tubes (Corning Incorporated, Cat # 8169) and centrifuge at 13,000 rpm for 5 minutes and take 5  $\mu$ L from this solution and dilute in 495  $\mu$ L of LCMS grade methanol (Fischer scientific, CAS # 67-56-1) in a 2mL glass auto sampler vial (Microsolv, Cat # 95025-WCV)
9. The samples are analyzed by LCMS-8040. (Shimadzu)



**Data:**

Day 1:

| Time (min) | Assay 1           |                | Assay 2           |                | Assay 3           |                | % remaining |         |         |
|------------|-------------------|----------------|-------------------|----------------|-------------------|----------------|-------------|---------|---------|
|            | LAU 463 Peak area | ISTD Peak area | LAU 463 Peak area | ISTD Peak area | LAU 463 Peak area | ISTD Peak area | Assay 1     | Assay 2 | Assay 3 |
| 0          | 40017             | 110382         | 41858             | 119807         | 38420             | 110467         | 99.87       | 100.10  | 99.94   |
| 10         | 36405             | 108314         | 36156             | 110853         | 34332             | 107107         | 92.59       | 93.45   | 92.10   |
| 20         | 35068             | 111286         | 33804             | 108649         | 33885             | 114225         | 86.80       | 89.14   | 85.24   |
| 30         | 31839             | 109123         | 30803             | 108326         | 29669             | 103425         | 80.37       | 81.47   | 82.43   |
| 40         | 29562             | 109819         | 29855             | 110849         | 28562             | 110188         | 74.15       | 77.17   | 74.48   |
| 50         | 24886             | 99310          | 25961             | 103663         | 27453             | 109407         | 69.03       | 71.75   | 72.10   |
| 60         | 23335             | 100114         | 25309             | 115500         | 26763             | 116484         | 64.21       | 62.78   | 66.02   |

Table 1: Peak areas and % remaining values

Day 2:

| Time (min) | Assay 1           |                | Assay 2           |                | Assay 3           |                | (% remaining) |         |         |
|------------|-------------------|----------------|-------------------|----------------|-------------------|----------------|---------------|---------|---------|
|            | LAU 463 Peak area | ISTD Peak area | LAU 463 Peak area | ISTD Peak area | LAU 463 Peak area | ISTD Peak area | Assay 1       | Assay 2 | Assay 3 |
| 0          | 49475             | 117867         | 49987             | 119544         | 48124             | 110902         | 99.94         | 100.03  | 99.98   |
| 10         | 45683             | 118348         | 44098             | 114025         | 47589             | 117783         | 91.90         | 92.52   | 93.09   |
| 20         | 39116             | 104050         | 37792             | 102482         | 38666             | 103094         | 89.50         | 88.22   | 86.41   |
| 30         | 42354             | 116764         | 36851             | 107165         | 37992             | 110412         | 86.36         | 82.26   | 79.28   |
| 40         | 34884             | 102256         | 38809             | 117335         | 33961             | 102324         | 81.22         | 79.12   | 76.47   |
| 50         | 39590             | 126003         | 34528             | 108682         | 35448             | 110883         | 74.80         | 76.00   | 73.66   |
| 60         | 33816             | 121431         | 32387             | 118994         | 38044             | 127573         | 66.30         | 65.11   | 68.71   |

Table 2: Peak areas and % remaining values

**Calculation:**

From the peak area, Calculate the following

$$\text{Peak area ratio} = \frac{\text{Peak area of test compound (LAU 463)}}{\text{Peak area of internal standard (Verapamil)}}$$

$$\% \text{ remaining at time T} = \frac{\text{Peak area ratio at particular time T}}{\text{Peak area ratio at zero time point}} * 100$$

(T = 0, 10, 20,30,40,50 and 60)

## DATA ANALYSIS:

### Day 1

Linear regression analysis:

Slope:  $-0.007155 \pm 0.0001949$

At X= 60, Y =  $4.178 \pm 0.007028$

$R^2 = 0.9861$

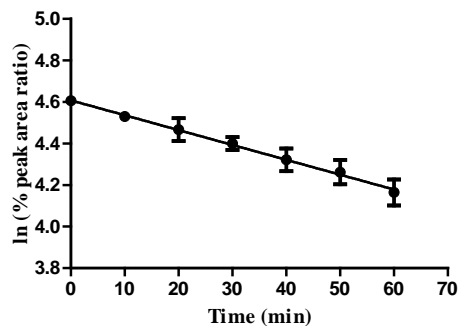

### Day 2

Linear regression analysis:

Slope:  $-0.006250 \pm 0.0002926$

At X = 60, Y =  $4.228 \pm 0.01055$

$R^2 = 0.9600$

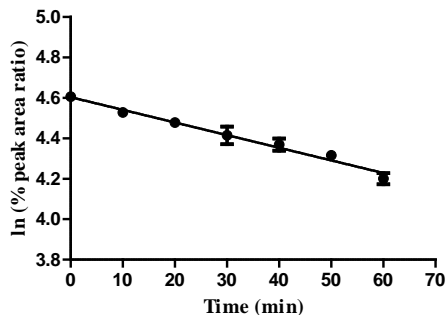

Metabolic Parameters:

Half-life:  $96.85 \pm 2.63$  min

$V_d$ : 100  $\mu$ L/mg

Intrinsic clearance: 0.7155  $\mu$ L/min/mg

Metabolic Rate: 14.31 nmol/min/mg

% remaining at 60 min:  $65.23 \pm 0.10$  %

Metabolic Parameters:

Half-life:  $110.88 \pm 5.19$  min

$V_d$ : 100  $\mu$ L/mg

Intrinsic clearance: 0.625  $\mu$ L/min/mg

Metabolic Rate: 12.5 nmol/min/mg

% remaining at 60 min:  $68.5 \pm 0.17$  %

Note: The peak area ratios and natural log values are calculated using Microsoft excel 2010 and linear regression analysis is calculated using GraphPad prism.

# Mouse Liver Microsomal Assay

Principal Investigator: Dr. Alexander Arnold  
Operator: Revathi Kodali  
Test Compound: **8n**  
Concentration: 10  $\mu\text{M}$   
Date: 04-13-2016  
Facility: Milwaukee Institute for Drug Discovery

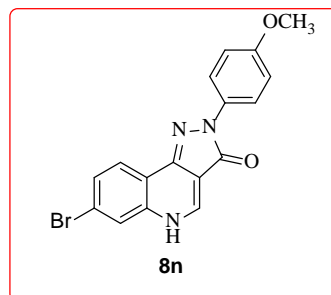

## Assay Protocol

Each evaluation included six independent assays carried out three at a time, on two different days

1. Preparation of solutions:
  - a. 1 mM test compound in DMSO.
  - b. 0.5  $\mu\text{M}$  4,5 Diphenyl Imidazole in ice cold Acetonitrile (ISTD).
2. For a total volume of Microsomal Assay Mixture (MAM) 390  $\mu\text{L}$ , sufficient for seven time points, combine the following
  - a. 282  $\mu\text{L}$  of 18.2 m $\Omega$  of water.
  - b. 80  $\mu\text{L}$  of 0.5 M potassium phosphate buffer (pH 7.4)
  - c. 20  $\mu\text{L}$  of NADPH A. (Corning life sciences, Cat # 451220)
  - d. 4  $\mu\text{L}$  of NADPH B. (Corning life sciences, Cat # 451200)
  - e. 4  $\mu\text{L}$  of test compound.
3. Sonicate MAM for 5 min and meanwhile thaw microsomes (20 mg/mL) (Life technologies, Cat # MSMC-PL) on ice.
4. Aliquot 100  $\mu\text{L}$  of ice cold ISTD into seven separate 1.5 mL conical vials and label them the time points for 0, 10, 20, 30, 40, 50, and 60 min.
5. Arrange the timer. Microsomes (Final concentration of 0.5 mg/mL) should be added to all time points except the zero time point.
6. Add 50  $\mu\text{L}$  of the MAM solution to the conical vial labelled as zero time point. Place the remaining MAM solution in the incubator (37  $^{\circ}\text{C}$ ) for 5 min and initiate the reaction with addition of microsomes (8.8  $\mu\text{L}$ ) and record the time.
7. At the end of each time interval remove 50  $\mu\text{L}$  and add to 100  $\mu\text{L}$  ISTD in conical vial, sonicate for 10 sec and spin down at 10,000 rpm for 5 minutes.
8. Take 100  $\mu\text{L}$  of supernatant and transfer to Spin-X HPLC filter tubes (Corning Incorporated, Cat # 8169) and centrifuge at 13,000 rpm for 5 minutes and take 5  $\mu\text{L}$  from this solution and dilute in 495  $\mu\text{L}$  of LCMS grade methanol (Fischer scientific, CAS # 67-56-1) in a 2mL glass auto sampler vial (Microsolv, Cat # 95025-WCV)
9. The samples are analyzed by LCMS-8040. (Shimadzu)

**Data:**

Day 1:

| Time (min) | Assay 1           |                | Assay 2           |                | Assay 3           |                | % remaining |         |         |
|------------|-------------------|----------------|-------------------|----------------|-------------------|----------------|-------------|---------|---------|
|            | LAU 463 Peak area | ISTD Peak area | LAU 463 Peak area | ISTD Peak area | LAU 463 Peak area | ISTD Peak area | Assay 1     | Assay 2 | Assay 3 |
| 0          | 48890             | 112924         | 49279             | 113143         | 49215             | 113661         | 99.98       | 99.89   | 100.00  |
| 10         | 45153             | 112247         | 43675             | 107282         | 47056             | 117053         | 92.90       | 93.37   | 92.84   |
| 20         | 38035             | 103753         | 42468             | 116346         | 40403             | 109584         | 84.66       | 83.71   | 85.14   |
| 30         | 39080             | 108516         | 39403             | 111577         | 40013             | 113332         | 83.17       | 80.99   | 81.53   |
| 40         | 34991             | 101201         | 34999             | 104471         | 35979             | 112089         | 79.85       | 76.83   | 74.13   |
| 50         | 33923             | 105799         | 32017             | 103609         | 34231             | 110384         | 74.05       | 70.87   | 71.61   |
| 60         | 30997             | 104638         | 31893             | 109310         | 32070             | 112609         | 68.41       | 66.91   | 65.77   |

Table 1: Peak areas and % remaining values

Day 2:

| Time (min) | Assay 1           |                | Assay 2           |                | Assay 3           |                | (% remaining) |         |         |
|------------|-------------------|----------------|-------------------|----------------|-------------------|----------------|---------------|---------|---------|
|            | LAU 463 Peak area | ISTD Peak area | LAU 463 Peak area | ISTD Peak area | LAU 463 Peak area | ISTD Peak area | Assay 1       | Assay 2 | Assay 3 |
| 0          | 49868             | 114209         | 48673             | 113475         | 50609             | 115332         | 99.91         | 99.98   | 99.95   |
| 10         | 45918             | 111248         | 43511             | 106649         | 45190             | 108674         | 94.45         | 95.10   | 94.72   |
| 20         | 40638             | 108555         | 41931             | 111724         | 43760             | 113925         | 85.66         | 87.48   | 87.49   |
| 30         | 39591             | 107243         | 41207             | 112646         | 40629             | 107987         | 84.47         | 85.27   | 85.70   |
| 40         | 42615             | 117892         | 38437             | 108907         | 39788             | 108268         | 82.71         | 82.26   | 83.71   |
| 50         | 37730             | 112216         | 35424             | 110108         | 39287             | 115905         | 76.94         | 74.99   | 77.21   |
| 60         | 34666             | 113551         | 30020             | 105567         | 32646             | 109583         | 69.86         | 66.28   | 67.86   |

Table 2: Peak areas and % remaining values

**Calculation:**

From the peak area, Calculate the following

$$\text{Peak area ratio} = \frac{\text{Peak area of test compound (LAU 463)}}{\text{Peak area of internal standard (Verapamil)}}$$

$$\% \text{ remaining at time T} = \frac{\text{Peak area ratio at particular time T}}{\text{Peak area ratio at zero time point}} * 100$$

(T = 0, 10, 20,30,40,50 and 60)

## DATA ANALYSIS:

### Day 1

Linear regression analysis:

Slope:  $-0.006435 \pm 0.0002287$

At X= 60, Y =  $4.208 \pm 0.008246$

$R^2 = 0.9766$

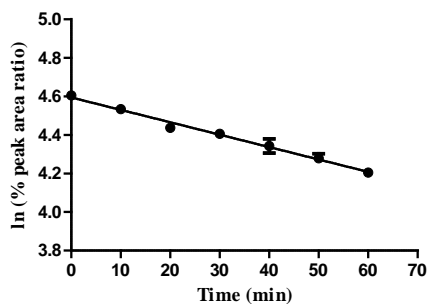

### Day 2

Linear regression analysis:

Slope:  $-0.005840 \pm 0.0003190$

At X = 60, Y =  $4.259 \pm 0.01150$

$R^2 = 0.9464$

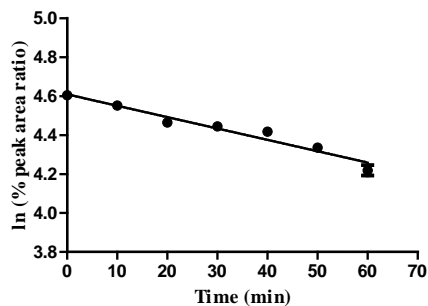

Metabolic Parameters:

Half-life:  $107.69 \pm 3.82$  min

$V_d$ :  $100 \mu\text{L}/\text{mg}$

Intrinsic clearance:  $0.6435 \mu\text{L}/\text{min}/\text{mg}$

Metabolic Rate:  $12.87 \text{ nmol}/\text{min}/\text{mg}$

% remaining at 60 min:  $67.22 \pm 0.13$  %

Metabolic Parameters:

Half-life:  $118.66 \pm 6.48$  min

$V_d$ :  $100 \mu\text{L}/\text{mg}$

Intrinsic clearance:  $0.584 \mu\text{L}/\text{min}/\text{mg}$

Metabolic Rate:  $11.68 \text{ nmol}/\text{min}/\text{mg}$

% remaining at 60 min:  $70.7 \pm 0.19$  %

Note: The peak area ratios and natural log values are calculated using Microsoft excel 2010 and linear regression analysis is calculated using GraphPad prism.

# Human Liver Microsomal Assay

Principal Investigator: Dr. Alexander Arnold

Operator: Revathi Kodali

Test Compound: **8o**

Concentration: 10  $\mu$ M

Date: 05-05-2016

Facility: Milwaukee Institute for Drug Discovery

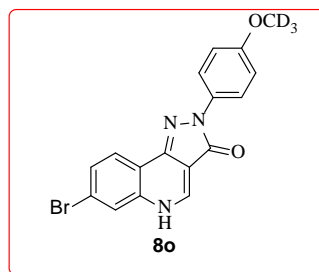

## Assay Protocol

Each evaluation included six independent assays carried out three at a time, on two different days

1. Preparation of solutions:
  - a. 1 mM test compound in DMSO.
  - b. 0.5  $\mu$ M 4,5 Diphenyl Imidazole in ice cold Acetonitrile (ISTD).
2. For a total volume of Microsomal Assay Mixture (MAM) 390  $\mu$ L, sufficient for seven time points, combine the following
  - a. 282  $\mu$ L of 18.2 m $\Omega$  of water.
  - b. 80  $\mu$ L of 0.5 M potassium phosphate buffer (p<sup>H</sup> 7.4)
  - c. 20  $\mu$ L of NADPH A. (Corning life sciences, Cat # 451220)
  - d. 4  $\mu$ L of NADPH B. (Corning life sciences, Cat # 451200)
  - e. 4  $\mu$ L of test compound.
3. Sonicate MAM for 5 min and meanwhile thaw microsomes (20 mg/mL) (BD Gentest, Cat # 452156) on ice.
4. Aliquot 100  $\mu$ L of ice cold ISTD into seven separate 1.5 mL conical vials and label them the time points for 0, 10, 20, 30, 40, 50, and 60 min.
5. Arrange the timer. Microsomes (Final concentration of 0.5 mg/mL) should be added to all time points except the zero time point.
6. Add 50  $\mu$ L of the MAM solution to the conical vial labelled as zero time point. Place the remaining MAM solution in the incubator (37  $^{\circ}$ C) for 5 min and initiate the reaction with addition of microsomes (8.8  $\mu$ L) and record the time.
7. At the end of each time interval remove 50  $\mu$ L and add to 100  $\mu$ L ISTD in conical vial, sonicate for 10 sec and spin down at 10,000 rpm for 5 minutes.
8. Take 100  $\mu$ L of supernatant and transfer to Spin-X HPLC filter tubes (Corning Incorporated, Cat # 8169) and centrifuge at 13,000 rpm for 5 minutes and take 5  $\mu$ L from this solution and dilute in 495  $\mu$ L of LCMS grade methanol (Fischer scientific, CAS # 67-56-1) in a 2mL glass auto sampler vial (Microsolv, Cat # 95025-WCV)
9. The samples are analyzed by LCMS-8040. (Shimadzu)

**Data:**

Day 1:

| Time (min) | Assay 1             |                | Assay 2             |                | Assay 3             |                | % remaining |         |         |
|------------|---------------------|----------------|---------------------|----------------|---------------------|----------------|-------------|---------|---------|
|            | DK-I-58-1 Peak area | ISTD Peak area | DK-I-58-1 Peak area | ISTD Peak area | DK-I-58-1 Peak area | ISTD Peak area | Assay 1     | Assay 2 | Assay 3 |
| 0          | 52579               | 105204         | 49506               | 99051          | 48659               | 98086          | 99.95       | 99.96   | 100.01  |
| 10         | 45825               | 93541          | 44451               | 93116          | 48471               | 98801          | 97.97       | 95.47   | 98.91   |
| 20         | 43583               | 94565          | 43623               | 95700          | 46503               | 99016          | 92.17       | 91.16   | 94.68   |
| 30         | 42546               | 96285          | 40594               | 92790          | 42711               | 96764          | 88.37       | 87.49   | 88.99   |
| 40         | 40999               | 96785          | 41454               | 96231          | 41457               | 96490          | 84.72       | 86.15   | 86.62   |
| 50         | 37334               | 91894          | 39270               | 94259          | 40259               | 95854          | 81.25       | 83.32   | 84.67   |
| 60         | 39122               | 95274          | 39560               | 97477          | 37942               | 93234          | 82.12       | 81.16   | 82.04   |

Table 1: Peak areas and % remaining values

Day 2:

| Time (min) | Assay 1             |                | Assay 2             |                | Assay 3             |                | (% remaining) |         |         |
|------------|---------------------|----------------|---------------------|----------------|---------------------|----------------|---------------|---------|---------|
|            | DK-I-58-1 Peak area | ISTD Peak area | DK-I-58-1 Peak area | ISTD Peak area | DK-I-58-1 Peak area | ISTD Peak area | Assay 1       | Assay 2 | Assay 3 |
| 0          | 49813               | 99775          | 51634               | 107495         | 53015               | 106527         | 100.05        | 100.07  | 99.93   |
| 10         | 48894               | 100371         | 46330               | 100245         | 51318               | 103178         | 97.62         | 96.28   | 99.87   |
| 20         | 46014               | 97980          | 45490               | 99937          | 46137               | 100422         | 94.11         | 94.83   | 92.25   |
| 30         | 45730               | 101697         | 42043               | 99140          | 44245               | 99348          | 90.11         | 88.34   | 89.42   |
| 40         | 42831               | 97947          | 40003               | 95150          | 41764               | 97359          | 87.63         | 87.58   | 86.13   |
| 50         | 41858               | 98511          | 44806               | 109872         | 42381               | 101831         | 85.15         | 84.95   | 83.57   |
| 60         | 43517               | 106102         | 40987               | 101673         | 42905               | 101517         | 82.19         | 83.98   | 84.86   |

Table 2: Peak areas and % remaining values

**Calculation:**

From the peak area, Calculate the following

$$\text{Peak area ratio} = \frac{\text{Peak area of test compound (DK-I-58-1)}}{\text{Peak area of internal standard (Verapamil)}}$$

$$\% \text{ remaining at time T} = \frac{\text{Peak area ratio at particular time T}}{\text{Peak area ratio at zero time point}} * 100$$

(T = 0, 10, 20,30,40,50 and 60)

## DATA ANALYSIS:

### Day 1

Linear regression analysis:

Slope:  $-0.003567 \pm 0.0001743$

At X= 60, Y =  $4.389 \pm 0.006286$

$R^2 = 0.9566$

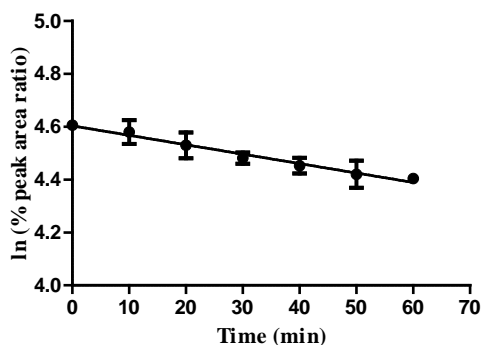

### Day 2

Linear regression analysis:

Slope:  $-0.003224 \pm 0.0001677$

At X = 60, Y =  $4.411 \pm 0.006045$

$R^2 = 0.9511$

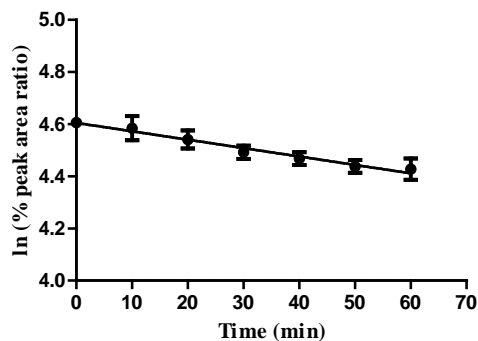

Metabolic Parameters:

Half-life:  $194.28 \pm 9.48$  min

$V_d$ : 100  $\mu$ L/mg

Intrinsic clearance: 0.3567  $\mu$ L/min/mg

Metabolic Rate: 7.134 nmol/min/mg

% remaining at 60 min:  $80.55 \pm 0.11$  %

Metabolic Parameters:

Half-life:  $214.95 \pm 11.18$  min

$V_d$ : 100  $\mu$ L/mg

Intrinsic clearance: 0.3224  $\mu$ L/min/mg

Metabolic Rate: 6.448 nmol/min/mg

% remaining at 60 min:  $82.35 \pm 0.11$  %

Note: The peak area ratios and natural log values are calculated using Microsoft excel 2010 and linear regression analysis is calculated using GraphPad prism.



# Mouse Liver Microsomal Assay

Principal Investigator: Dr. Alexander Arnold

Operator: Revathi Kodali

Test Compound: **8o**

Concentration: 10  $\mu$ M

Date: 05-05-2016

Facility: Milwaukee Institute for Drug Discovery

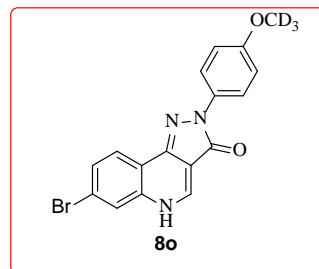

## Assay Protocol

Each evaluation included six independent assays carried out three at a time, on two different days

1. Preparation of solutions:
  - a. 1 mM test compound in DMSO.
  - b. 0.5  $\mu$ M 4,5 Diphenyl Imidazole in ice cold Acetonitrile (ISTD).
2. For a total volume of Microsomal Assay Mixture (MAM) 390  $\mu$ L, sufficient for seven time points, combine the following
  - a. 282  $\mu$ L of 18.2 m $\Omega$  of water.
  - b. 80  $\mu$ L of 0.5 M potassium phosphate buffer (p<sup>H</sup> 7.4)
  - c. 20  $\mu$ L of NADPH A. (Corning life sciences, Cat # 451220)
  - d. 4  $\mu$ L of NADPH B. (Corning life sciences, Cat # 451200)
  - e. 4  $\mu$ L of test compound.
3. Sonicate MAM for 5 min and meanwhile thaw microsomes (20 mg/mL) (BD Gentest, Cat # 452156) on ice.
4. Aliquot 100  $\mu$ L of ice cold ISTD into seven separate 1.5 mL conical vials and label them the time points for 0, 10, 20, 30, 40, 50, and 60 min.
5. Arrange the timer. Microsomes (Final concentration of 0.5 mg/mL) should be added to all time points except the zero time point.
6. Add 50  $\mu$ L of the MAM solution to the conical vial labelled as zero time point. Place the remaining MAM solution in the incubator (37 °C) for 5 min and initiate the reaction with addition of microsomes (8.8  $\mu$ L) and record the time.
7. At the end of each time interval remove 50  $\mu$ L and add to 100  $\mu$ L ISTD in conical vial, sonicate for 10 sec and spin down at 10,000 rpm for 5 minutes.
8. Take 100  $\mu$ L of supernatant and transfer to Spin-X HPLC filter tubes (Corning Incorporated, Cat # 8169) and centrifuge at 13,000 rpm for 5 minutes and take 5  $\mu$ L from this solution and dilute in 495  $\mu$ L of LCMS grade methanol (Fischer scientific, CAS # 67-56-1) in an 2mL glass auto sampler vial (Microsolv, Cat # 95025-WCV)
9. The samples are analyzed by LCMS-8040. (Shimadzu)

**Data:**

Day 1:

| Time (min) | Assay 1             |                | Assay 2             |                | Assay 3             |                | % remaining |         |         |
|------------|---------------------|----------------|---------------------|----------------|---------------------|----------------|-------------|---------|---------|
|            | DK-I-58-1 Peak area | ISTD Peak area | DK-I-58-1 Peak area | ISTD Peak area | DK-I-58-1 Peak area | ISTD Peak area | Assay 1     | Assay 2 | Assay 3 |
| 0          | 45407               | 99025          | 45778               | 109217         | 48351               | 111002         | 99.90       | 100.03  | 99.90   |
| 10         | 39689               | 88172          | 39750               | 98111          | 47817               | 112502         | 98.06       | 96.69   | 97.48   |
| 20         | 38346               | 95002          | 36676               | 101161         | 40927               | 111059         | 87.93       | 86.5    | 84.52   |
| 30         | 36091               | 94410          | 37944               | 107423         | 36126               | 98426          | 83.28       | 84.30   | 84.18   |
| 40         | 38332               | 101105         | 37964               | 110739         | 40143               | 115678         | 82.59       | 81.82   | 79.59   |
| 50         | 37879               | 103619         | 29626               | 91731          | 30557               | 93383          | 79.64       | 77.08   | 75.05   |
| 60         | 35899               | 101755         | 28546               | 92601          | 31989               | 100220         | 76.86       | 73.57   | 73.20   |

Table 1: Peak areas and % remaining values

Day 2:

| Time (min) | Assay 1             |                | Assay 2             |                | Assay 3             |                | (% remaining) |         |         |
|------------|---------------------|----------------|---------------------|----------------|---------------------|----------------|---------------|---------|---------|
|            | DK-I-58-1 Peak area | ISTD Peak area | DK-I-58-1 Peak area | ISTD Peak area | DK-I-58-1 Peak area | ISTD Peak area | Assay 1       | Assay 2 | Assay 3 |
| 0          | 47531               | 108669         | 49814               | 114293         | 53117               | 126614         | 100.09        | 99.96   | 99.88   |
| 10         | 41907               | 100372         | 46729               | 109931         | 47056               | 115838         | 95.54         | 97.49   | 96.72   |
| 20         | 39682               | 102754         | 44889               | 113608         | 43666               | 116211         | 88.37         | 90.62   | 89.46   |
| 30         | 36906               | 100187         | 42827               | 112938         | 41706               | 120148         | 84.29         | 86.97   | 82.64   |
| 40         | 32951               | 94121          | 40182               | 112083         | 36083               | 105504         | 80.11         | 82.22   | 81.43   |
| 50         | 32511               | 95049          | 36769               | 103352         | 35590               | 109154         | 78.27         | 81.59   | 77.63   |
| 60         | 31896               | 99642          | 34866               | 105232         | 34822               | 111570         | 73.25         | 75.99   | 74.31   |

Table 2: Peak areas and % remaining values

**Calculation:**

From the peak area, Calculate the following

$$\text{Peak area ratio} = \frac{\text{Peak area of test compound (DK-I-58-1)}}{\text{Peak area of internal standard (Verapamil)}}$$

$$\% \text{ remaining at time T} = \frac{\text{Peak area ratio at particular time T}}{\text{Peak area ratio at zero time point}} * 100$$

(T = 0, 10, 20,30,40,50 and 60)

## DATA ANALYSIS:

### Day 1

Linear regression analysis:

Slope:  $-0.005018 \pm 0.0003001$

At X= 60, Y =  $4.296 \pm 0.01082$

$R^2 = 0.9364$

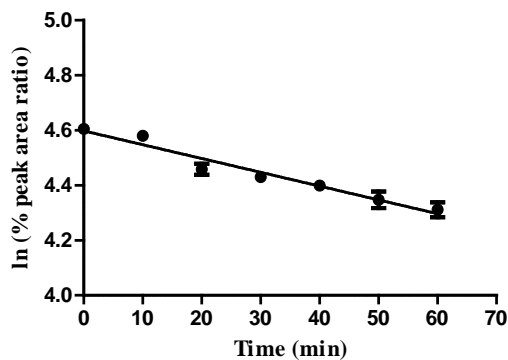

Metabolic Parameters:

Half-life:  $138.10 \pm 8.25$  min

$V_d$ :  $100 \mu\text{L}/\text{mg}$

Intrinsic clearance:  $0.5018 \mu\text{L}/\text{min}/\text{mg}$

Metabolic Rate:  $10.036 \text{ nmol}/\text{min}/\text{mg}$

% remaining at 60 min:  $73.40 \pm 0.18$  %

Note: The peak area ratios and natural log values are calculated using Microsoft excel 2010 and linear regression analysis is calculated using GraphPad prism.

### Day 2

Linear regression analysis:

Slope:  $-0.004920 \pm 0.0002135$

At X = 60, Y =  $4.308 \pm 0.007697$

$R^2 = 0.9511$

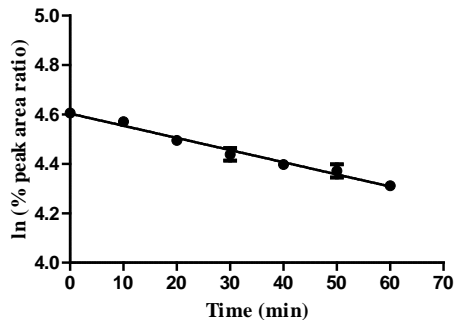

Metabolic Parameters:

Half-life:  $140.85 \pm 6.11$  min

$V_d$ :  $100 \mu\text{L}/\text{mg}$

Intrinsic clearance:  $0.492 \mu\text{L}/\text{min}/\text{mg}$

Metabolic Rate:  $9.84 \text{ nmol}/\text{min}/\text{mg}$

% remaining at 60 min:  $74.29 \pm 0.13$  %

# Human Liver Microsomal Assay

Principal Investigator: Dr. Alexander Arnold

Operator: Revathi Kodali

Test Compound: **8p**

Concentration: 10  $\mu$ M

Date: 02-28-2017

Facility: Milwaukee Institute for Drug Discovery

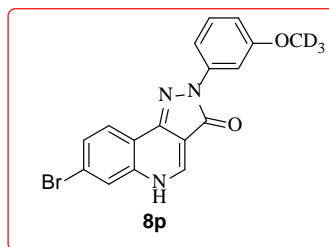

## Assay Protocol

Each evaluation included six independent assays carried out three at a time, on two different days

1. Preparation of solutions:
  - a. 1 mM test compound in DMSO.
  - b. 3  $\mu$ M Verapamil in ice cold Acetonitrile (ISTD).
2. For a total volume of Microsomal Assay Mixture (MAM) 390  $\mu$ L, sufficient for seven time points, combine the following
  - a. 282  $\mu$ L of 18.2 m $\Omega$  of water.
  - b. 80  $\mu$ L of 0.5 M potassium phosphate buffer (p<sup>H</sup> 7.4)
  - c. 20  $\mu$ L of NADPH A. (Corning life sciences, Cat # 451220)
  - d. 4  $\mu$ L of NADPH B. (Corning life sciences, Cat # 451200)
  - e. 4  $\mu$ L of test compound.
3. Sonicate MAM for 5 min and meanwhile thaw microsomes (20 mg/mL) (BD Gentest, Cat # 452156) on ice.
4. Aliquot 100  $\mu$ L of ice cold ISTD into seven separate 1.5 mL conical vials and label them the time points for 0, 10, 20, 30, 40, 50, and 60 min.
5. Arrange the timer. Microsomes (Final concentration of 0.5 mg/mL) should be added to all time points except the zero time point.
6. Add 50  $\mu$ L of the MAM solution to the conical vial labelled as zero time point. Place the remaining MAM solution in the incubator (37  $^{\circ}$ C) for 5 min and initiate the reaction with addition of microsomes (8.8  $\mu$ L) and record the time.
7. At the end of each time interval remove 50  $\mu$ L and add to 100  $\mu$ L ISTD in conical vial, sonicate for 10 sec and spin down at 10,000 rpm for 5 minutes.
8. Take 100  $\mu$ L of supernatant and transfer to Spin-X HPLC filter tubes (Corning Incorporated, Cat # 8169) and centrifuge at 13,000 rpm for 5 minutes and take 5  $\mu$ L from this solution and dilute in 495  $\mu$ L of LCMS grade methanol (Fischer scientific, CAS # 67-56-1) in a 2mL glass auto sampler vial (Microsolv, Cat # 95025-WCV)
9. The samples are analyzed by LCMS-8040. (Shimadzu)

**Data:**

Day 1:

| Time (min) | Assay 1             |                     | Assay 2             |                     | Assay 3             |                     | % remaining |         |         |
|------------|---------------------|---------------------|---------------------|---------------------|---------------------|---------------------|-------------|---------|---------|
|            | DK-I-92-1 Peak area | Verapamil Peak area | DK-I-92-1 Peak area | Verapamil Peak area | DK-I-92-1 Peak area | Verapamil Peak area | Assay 1     | Assay 2 | Assay 3 |
| 0          | 59983               | 321908              | 58272               | 320874              | 62965               | 326832              | 100.18      | 99.78   | 99.82   |
| 10         | 50570               | 320891              | 51796               | 331636              | 59165               | 330127              | 84.72       | 85.81   | 92.86   |
| 20         | 48532               | 331288              | 48615               | 332097              | 50049               | 327548              | 78.76       | 80.43   | 79.17   |
| 30         | 45866               | 320891              | 42178               | 326711              | 45910               | 327644              | 76.84       | 70.93   | 72.60   |
| 40         | 42711               | 331008              | 40045               | 323974              | 41991               | 330194              | 69.37       | 67.91   | 65.89   |
| 50         | 39783               | 322898              | 43199               | 326744              | 43192               | 327634              | 66.24       | 72.64   | 68.30   |
| 60         | 40250               | 321356              | 41123               | 330100              | 45947               | 331073              | 67.33       | 68.44   | 71.90   |

Table 1: Peak areas and % remaining values

Day 2:

| Time (min) | Assay 1             |                     | Assay 2             |                     | Assay 3             |                     | (% remaining) |         |         |
|------------|---------------------|---------------------|---------------------|---------------------|---------------------|---------------------|---------------|---------|---------|
|            | DK-I-92-1 Peak area | Verapamil Peak area | DK-I-92-1 Peak area | Verapamil Peak area | DK-I-92-1 Peak area | Verapamil Peak area | Assay 1       | Assay 2 | Assay 3 |
| 0          | 58466               | 325834              | 57839               | 331063              | 61445               | 328646              | 100.24        | 99.83   | 99.98   |
| 10         | 52258               | 327543              | 50774               | 327534              | 52235               | 327167              | 89.13         | 88.58   | 85.37   |
| 20         | 43637               | 300183              | 44263               | 327846              | 46981               | 326348              | 81.21         | 77.14   | 76.98   |
| 30         | 44482               | 328643              | 41357               | 324543              | 43352               | 320087              | 75.61         | 72.81   | 72.42   |
| 40         | 41402               | 325673              | 39919               | 329634              | 40509               | 326849              | 71.02         | 69.20   | 66.27   |
| 50         | 39693               | 328964              | 40765               | 331208              | 41609               | 326183              | 67.40         | 70.33   | 68.21   |
| 60         | 39214               | 330132              | 39549               | 330974              | 42418               | 323491              | 66.35         | 68.28   | 70.12   |

Table 2: Peak areas and % remaining values

**Calculation:**

From the peak area, Calculate the following

$$\text{Peak area ratio} = \frac{\text{Peak area of test compound (DK-I-92-1)}}{\text{Peak area of internal standard (Verapamil)}}$$

$$\% \text{ remaining at time T} = \frac{\text{Peak area ratio at particular time T}}{\text{Peak area ratio at zero time point}} * 100$$

(T = 0, 10, 20,30,40,50 and 60)

## DATA ANALYSIS:

### Day 1

Linear regression analysis:

Slope:  $-0.006219 \pm 0.0006880$

At X= 60, Y =  $4.161 \pm 0.02481$

$R^2 = 0.8114$

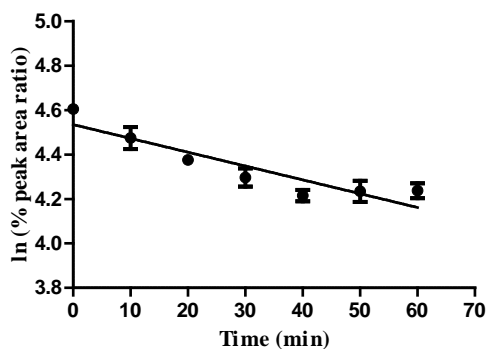

Metabolic Parameters:

Half-life:  $111 \pm 12$  min

$V_d$ :  $100 \mu\text{L}/\text{mg}$

Intrinsic clearance:  $0.6219 \mu\text{L}/\text{min}/\text{mg}$

Metabolic Rate:  $12.43 \text{ nmol}/\text{min}/\text{mg}$

% remaining at 60 min:  $64 \pm 0.32 \%$

### Day 2

Linear regression analysis:

Slope:  $-0.006312 \pm 0.0006039$

At X = 60, Y =  $4.157 \pm 0.02178$

$R^2 = 0.8518$

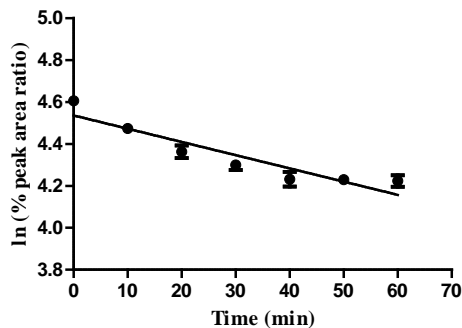

Metabolic Parameters:

Half-life:  $109 \pm 10$  min

$V_d$ :  $100 \mu\text{L}/\text{mg}$

Intrinsic clearance:  $0.6312 \mu\text{L}/\text{min}/\text{mg}$

Metabolic Rate:  $12.624 \text{ nmol}/\text{min}/\text{mg}$

% remaining at 60 min:  $63 \pm 0.33 \%$

Note: The peak area ratios and natural log values are calculated using Microsoft excel 2010 and linear regression analysis is calculated using GraphPad prism.

# Mouse Liver Microsomal Assay

Principal Investigator: Dr. Alexander Arnold

Operator: Revathi Kodali

Test Compound: **8p**

Concentration: 10  $\mu$ M

Date: 02-28-2017

Facility: Milwaukee Institute for Drug Discovery

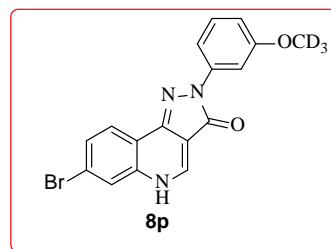

## Assay Protocol

Each evaluation included six independent assays carried out three at a time, on two different days

1. Preparation of solutions:
  - a. 1 mM test compound in DMSO.
  - b. 3  $\mu$ M Verapamil in ice cold Acetonitrile (ISTD).
2. For a total volume of Microsomal Assay Mixture (MAM) 390  $\mu$ L, sufficient for seven time points, combine the following
  - a. 282  $\mu$ L of 18.2 m $\Omega$  of water.
  - b. 80  $\mu$ L of 0.5 M potassium phosphate buffer (p<sup>H</sup> 7.4)
  - c. 20  $\mu$ L of NADPH A. (Corning life sciences, Cat # 451220)
  - d. 4  $\mu$ L of NADPH B. (Corning life sciences, Cat # 451200)
  - e. 4  $\mu$ L of test compound.
3. Sonicate MAM for 5 min and meanwhile thaw microsomes (20 mg/mL) (Life technologies, Cat # MSMC-PL) on ice.
4. Aliquot 100  $\mu$ L of ice cold ISTD into seven separate 1.5 mL conical vials and label them the time points for 0, 10, 20, 30, 40, 50, and 60 min.
5. Arrange the timer. Microsomes (Final concentration of 0.5 mg/mL) should be added to all time points except the zero time point.
6. Add 50  $\mu$ L of the MAM solution to the conical vial labelled as zero time point. Place the remaining MAM solution in the incubator (37  $^{\circ}$ C) for 5 min and initiate the reaction with addition of microsomes (8.8  $\mu$ L) and record the time.
7. At the end of each time interval remove 50  $\mu$ L and add to 100  $\mu$ L ISTD in conical vial, sonicate for 10 sec and spin down at 10,000 rpm for 5 minutes.
8. Take 100  $\mu$ L of supernatant and transfer to Spin-X HPLC filter tubes (Corning Incorporated, Cat # 8169) and centrifuge at 13,000 rpm for 5 minutes and take 5  $\mu$ L from this solution and dilute in 495  $\mu$ L of LCMS grade methanol (Fischer scientific, CAS # 67-56-1) in a 2mL glass auto sampler vial (Microsolv, Cat # 95025-WCV)
9. The samples are analyzed by LCMS-8040. (Shimadzu)

**Data:**

Day 1:

| Time (min) | Assay 1             |                     | Assay 2             |                     | Assay 3             |                     | % remaining |         |         |
|------------|---------------------|---------------------|---------------------|---------------------|---------------------|---------------------|-------------|---------|---------|
|            | DK-I-92-1 Peak area | Verapamil Peak area | DK-I-92-1 Peak area | Verapamil Peak area | DK-I-92-1 Peak area | Verapamil Peak area | Assay 1     | Assay 2 | Assay 3 |
| 0          | 56473               | 328643              | 54532               | 330183              | 56831               | 328124              | 99.90       | 100.09  | 100.11  |
| 10         | 52879               | 326447              | 52410               | 328634              | 53076               | 320843              | 94.17       | 96.65   | 95.62   |
| 20         | 49695               | 325843              | 49012               | 327634              | 49066               | 327843              | 88.67       | 90.66   | 86.51   |
| 30         | 49248               | 328643              | 47078               | 328634              | 46463               | 327563              | 87.12       | 86.82   | 81.99   |
| 40         | 47758               | 325766              | 44351               | 324451              | 44309               | 325684              | 85.23       | 82.84   | 78.64   |
| 50         | 46538               | 329766              | 42829               | 319874              | 46234               | 330198              | 82.04       | 81.14   | 80.93   |
| 60         | 43351               | 300784              | 44611               | 320073              | 46103               | 321843              | 83.79       | 84.47   | 82.80   |

Table 1: Peak areas and % remaining values

Day 2:

| Time (min) | Assay 1             |                     | Assay 2             |                     | Assay 3             |                     | (% remaining) |         |         |
|------------|---------------------|---------------------|---------------------|---------------------|---------------------|---------------------|---------------|---------|---------|
|            | DK-I-92-1 Peak area | Verapamil Peak area | DK-I-92-1 Peak area | Verapamil Peak area | DK-I-92-1 Peak area | Verapamil Peak area | Assay 1       | Assay 2 | Assay 3 |
| 0          | 64419               | 324783              | 61391               | 326673              | 62173               | 327893              | 100.17        | 99.96   | 99.79   |
| 10         | 63199               | 327912              | 58288               | 327684              | 58681               | 326874              | 97.33         | 94.61   | 94.48   |
| 20         | 58267               | 331287              | 52796               | 326943              | 54301               | 328743              | 88.82         | 85.89   | 86.93   |
| 30         | 55696               | 327564              | 50682               | 331084              | 52864               | 325873              | 85.87         | 81.42   | 85.38   |
| 40         | 52483               | 328634              | 51361               | 327439              | 51100               | 328964              | 80.65         | 83.43   | 81.75   |
| 50         | 53109               | 320734              | 52568               | 323289              | 52717               | 330023              | 83.62         | 86.49   | 84.07   |
| 60         | 54167               | 331674              | 51031               | 334087              | 52001               | 326484              | 82.48         | 81.24   | 83.82   |

Table 2: Peak areas and % remaining values

**Calculation:**

From the peak area, Calculate the following

$$\text{Peak area ratio} = \frac{\text{Peak area of test compound (DK-I-92-1)}}{\text{Peak area of internal standard (Verapamil)}}$$

$$\% \text{ remaining at time T} = \frac{\text{Peak area ratio at particular time T}}{\text{Peak area ratio at zero time point}} * 100$$

(T = 0, 10, 20,30,40,50 and 60)



## DATA ANALYSIS:

### Day 1

Linear regression analysis:

Slope:  $-0.003323 \pm 0.0004092$

At X= 60, Y =  $4.376 \pm 0.01475$

$R^2 = 0.7763$

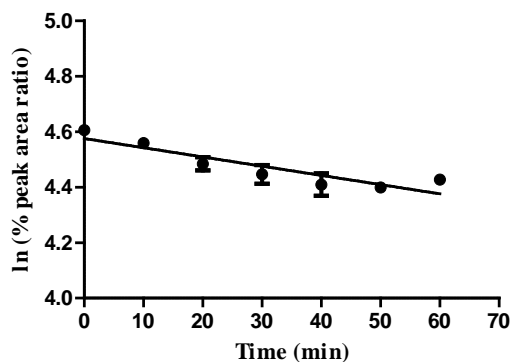

Metabolic Parameters:

Half-life:  $208 \pm 25$  min

$V_d$ :  $100 \mu\text{L}/\text{mg}$

Intrinsic clearance:  $0.3323 \mu\text{L}/\text{min}/\text{mg}$

Metabolic Rate:  $6.646 \text{ nmol}/\text{min}/\text{mg}$

% remaining at 60 min:  $79 \pm 0.26 \%$

### Day 2

Linear regression analysis:

Slope:  $-0.003129 \pm 0.0004255$

At X = 60, Y =  $4.381 \pm 0.01534$

$R^2 = 0.7399$

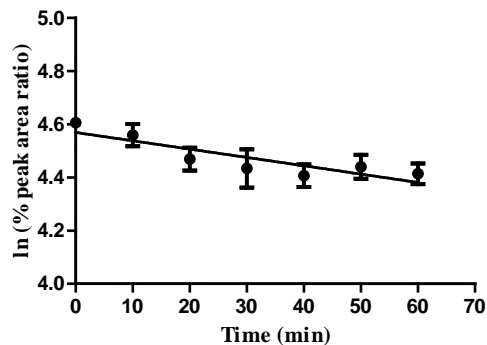

Metabolic Parameters:

Half-life:  $221 \pm 30$  min

$V_d$ :  $100 \mu\text{L}/\text{mg}$

Intrinsic clearance:  $0.3129 \mu\text{L}/\text{min}/\text{mg}$

Metabolic Rate:  $6.258 \text{ nmol}/\text{min}/\text{mg}$

% remaining at 60 min:  $80 \pm 0.30 \%$

Note: The peak area ratios and natural log values are calculated using Microsoft excel 2010 and linear regression analysis is calculated using GraphPad prism.

# Human Liver Microsomal Assay

Principal Investigator: Dr. Alexander Arnold

Operator: Revathi Kodali

Test Compound: **8q**

Concentration: 10  $\mu$ M

Date: 08-15-2016

Facility: Milwaukee Institute for Drug Discovery

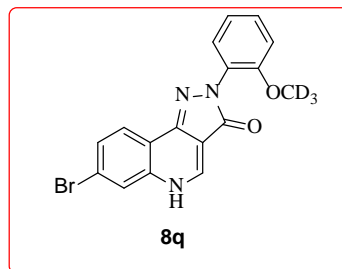

## Assay Protocol

Each evaluation included six independent assays carried out three at a time, on two different days

1. Preparation of solutions:
  - a. 1 mM test compound in DMSO.
  - b. 1  $\mu$ M 4,5 Di Phenyl Imidazole in ice cold Acetonitrile (ISTD).
2. For a total volume of Microsomal Assay Mixture (MAM) 390  $\mu$ L, sufficient for seven time points, combine the following
  - a. 282  $\mu$ L of 18.2 m $\Omega$  of water.
  - b. 80  $\mu$ L of 0.5 M potassium phosphate buffer (pH 7.4)
  - c. 20  $\mu$ L of NADPH A. (Corning life sciences, Cat # 451220)
  - d. 4  $\mu$ L of NADPH B. (Corning life sciences, Cat # 451200)
  - e. 4  $\mu$ L of test compound.
3. Sonicate MAM for 5 min and meanwhile thaw microsomes (20 mg/mL) (BD Biosciences, Cat # 452156) on ice.
4. Aliquot 100  $\mu$ L of ice cold ISTD into seven separate 1.5 mL conical vials and label them the time points for 0, 10, 20, 30, 40, 50, and 60 min.
5. Arrange the timer. Microsomes (Final concentration of 0.5 mg/mL) should be added to all time points except the zero time point.
6. Add 50  $\mu$ L of the MAM solution to the conical vial labelled as zero time point. Place the remaining MAM solution in the incubator (37  $^{\circ}$ C) for 5 min and initiate the reaction with addition of microsomes (8.8  $\mu$ L) and record the time.
7. At the end of each time interval remove 50  $\mu$ L and add to 100  $\mu$ L ISTD in conical vial, sonicate for 10 sec and spin down at 10,000 rpm for 5 minutes.
8. Take 100  $\mu$ L of supernatant and transfer to Spin-X HPLC filter tubes (Corning Incorporated, Cat # 8169) and centrifuge at 13,000 rpm for 5 minutes and take 5  $\mu$ L from this solution and dilute in 495  $\mu$ L of LCMS grade methanol (Fischer scientific, CAS # 67-56-1) in an 2mL glass auto sampler vial (Microsolv, Cat # 95025-WCV)
9. The samples are analyzed by LCMS-8040. (Shimadzu)

**Data:**

Day 1:

| Time (min) | Assay 1             |                | Assay 2             |                | Assay 3             |                | % remaining |         |         |
|------------|---------------------|----------------|---------------------|----------------|---------------------|----------------|-------------|---------|---------|
|            | DK-I-89-1 Peak area | ISTD Peak area | DK-I-89-1 Peak area | ISTD Peak area | DK-I-89-1 Peak area | ISTD Peak area | Assay 1     | Assay 2 | Assay 3 |
| 0          | 565063              | 1986723        | 588540              | 1967352        | 555706              | 1976123        | 100.14      | 100.05  | 100.07  |
| 10         | 543616              | 1967237        | 563545              | 1967235        | 547671              | 1976236        | 97.30       | 95.80   | 98.62   |
| 20         | 526501              | 1967236        | 539026              | 1896235        | 516591              | 1897823        | 94.23       | 95.07   | 96.86   |
| 30         | 504039              | 1967236        | 545481              | 2000823        | 500945              | 1897236        | 90.21       | 91.18   | 93.96   |
| 40         | 522804              | 1963562        | 562762              | 1987328        | 511914              | 1967263        | 93.75       | 94.70   | 92.60   |
| 50         | 525487              | 2000732        | 541596              | 1966237        | 524543              | 1987623        | 92.48       | 92.12   | 93.91   |
| 60         | 529045              | 1967235        | 542507              | 1956253        | 527483              | 1965232        | 94.69       | 92.74   | 95.51   |

Table 1: Peak areas and % remaining values

Day 2:

| Time (min) | Assay 1             |                | Assay 2             |                | Assay 3             |                | (% remaining) |         |         |
|------------|---------------------|----------------|---------------------|----------------|---------------------|----------------|---------------|---------|---------|
|            | DK-I-89-1 Peak area | ISTD Peak area | DK-I-89-1 Peak area | ISTD Peak area | DK-I-89-1 Peak area | ISTD Peak area | Assay 1       | Assay 2 | Assay 3 |
| 0          | 542091              | 2008782        | 528526              | 1962632        | 563729              | 1989123        | 99.94         | 100.10  | 100.14  |
| 10         | 497942              | 1899972        | 498199              | 1967236        | 535488              | 2000126        | 97.06         | 94.14   | 94.60   |
| 20         | 508446              | 1972628        | 496390              | 1978236        | 528768              | 1988367        | 95.46         | 93.28   | 93.96   |
| 30         | 507591              | 1988316        | 500842              | 1956625        | 538342              | 1976213        | 94.55         | 95.15   | 96.25   |
| 40         | 511063              | 1987236        | 509942              | 1972637        | 515849              | 1963256        | 95.24         | 96.10   | 92.84   |
| 50         | 497689              | 1967262        | 497074              | 1976236        | 545138              | 2008362        | 93.69         | 93.50   | 95.91   |
| 60         | 506687              | 1972367        | 508595              | 1978236        | 516138              | 1967235        | 95.14         | 95.57   | 92.70   |

Table 2: Peak areas and % remaining values

**Calculation:**

From the peak area, Calculate the following

$$\text{Peak area ratio} = \frac{\text{Peak area of test compound (DK-I-89-1)}}{\text{Peak area of internal standard (ISTD)}}$$

$$\% \text{ remaining at time T} = \frac{\text{Peak area ratio at particular time T}}{\text{Peak area ratio at zero time point}} * 100$$

(T = 0, 10, 20,30,40,50 and 60)

## DATA ANALYSIS:

### Day 1

Linear regression analysis:

Slope:  $-0.001035 \pm 0.0002435$

At X= 60, Y =  $4.523 \pm 0.0008781$

$R^2 = 0.4871$

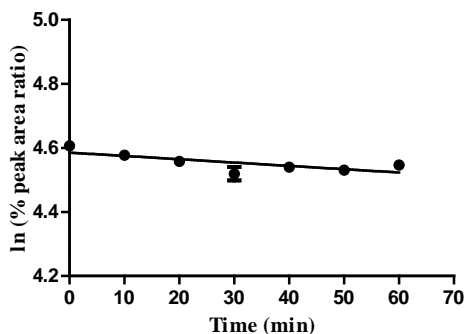

### Day 2

Linear regression analysis:

Slope:  $-0.0006738 \pm 0.0002075$

At X = 60, Y =  $4.539 \pm 0.007480$

$R^2 = 0.3570$

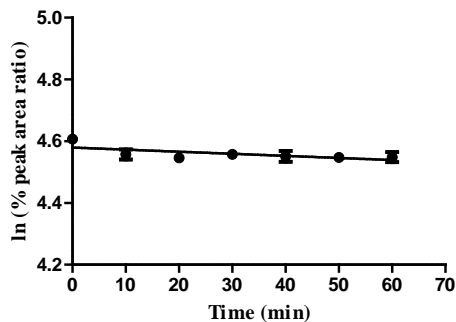

Metabolic Parameters:

Half-life:  $669.5652 \pm 157.52$  min

$V_d$ : 100  $\mu\text{L}/\text{mg}$

Intrinsic clearance: 0.1035  $\mu\text{L}/\text{min}/\text{mg}$

Metabolic Rate: 2.07 nmol/min/mg

% remaining at 60 min:  $92.11 \pm 0.17$  %

Metabolic Parameters:

Half-life:  $1028.95 \pm 316.72$  min

$V_d$ : 100  $\mu\text{L}/\text{mg}$

Intrinsic clearance: 0.06738  $\mu\text{L}/\text{min}/\text{mg}$

Metabolic Rate: 1.3476 nmol/min/mg

% remaining at 60 min:  $93.59 \pm 0.15$  %

Note: The peak area ratios and natural log values are calculated using Microsoft excel 2010 and linear regression analysis is calculated using GraphPad prism.

# Mouse Liver Microsomal Assay

Principal Investigator: Dr. Alexander Arnold

Operator: Revathi Kodali

Test Compound: **8q**

Concentration: 10  $\mu$ M

Date: 08-15-2016

Facility: Milwaukee Institute for Drug Discovery

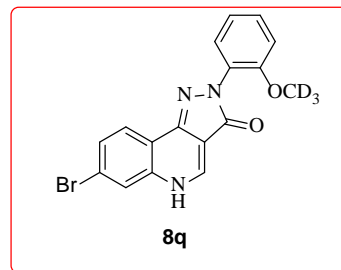

## Assay Protocol

Each evaluation included six independent assays carried out three at a time, on two different days

1. Preparation of solutions:
  - a. 1 mM test compound in DMSO.
  - b. 1  $\mu$ M 4,5 Di Phenyl Imidazole in ice cold Acetonitrile (ISTD).
2. For a total volume of Microsomal Assay Mixture (MAM) 390  $\mu$ L, sufficient for seven time points, combine the following
  - a. 282  $\mu$ L of 18.2 m $\Omega$  of water.
  - b. 80  $\mu$ L of 0.5 M potassium phosphate buffer (pH 7.4)
  - c. 20  $\mu$ L of NADPH A. (Corning life sciences, Cat # 451220)
  - d. 4  $\mu$ L of NADPH B. (Corning life sciences, Cat # 451200)
  - e. 4  $\mu$ L of test compound.
3. Sonicate MAM for 5 min and meanwhile thaw microsomes (20 mg/mL) (Life technologies, Cat # MSMC-PL) on ice.
4. Aliquot 100  $\mu$ L of ice cold ISTD into seven separate 1.5 mL conical vials and label them the time points for 0, 10, 20, 30, 40, 50, and 60 min.
5. Arrange the timer. Microsomes (Final concentration of 0.5 mg/mL) should be added to all time points except the zero time point.
6. Add 50  $\mu$ L of the MAM solution to the conical vial labelled as zero time point. Place the remaining MAM solution in the incubator (37  $^{\circ}$ C) for 5 min and initiate the reaction with addition of microsomes (8.8  $\mu$ L) and record the time.
7. At the end of each time interval remove 50  $\mu$ L and add to 100  $\mu$ L ISTD in conical vial, sonicate for 10 sec and spin down at 10,000 rpm for 5 minutes.
8. Take 100  $\mu$ L of supernatant and transfer to Spin-X HPLC filter tubes (Corning Incorporated, Cat # 8169) and centrifuge at 13,000 rpm for 5 minutes and take 5  $\mu$ L from this solution and dilute in 495  $\mu$ L of LCMS grade methanol (Fischer scientific, CAS # 67-56-1) in a 2mL glass auto sampler vial (Microsolv, Cat # 95025-WCV)
9. The samples are analyzed by LCMS-8040. (Shimadzu)

**Data:**

Day 1:

| Time (min) | Assay 1             |                | Assay 2             |                | Assay 3             |                | % remaining |         |         |
|------------|---------------------|----------------|---------------------|----------------|---------------------|----------------|-------------|---------|---------|
|            | DK-I-89-1 Peak area | ISTD Peak area | DK-I-89-1 Peak area | ISTD Peak area | DK-I-89-1 Peak area | ISTD Peak area | Assay 1     | Assay 2 | Assay 3 |
| 0          | 576315              | 1967238        | 541302              | 1967322        | 566955              | 1967623        | 99.98       | 100.05  | 100.04  |
| 10         | 512948              | 1967625        | 464987              | 2007882        | 498225              | 1976723        | 88.97       | 84.21   | 87.51   |
| 20         | 451074              | 1956523        | 459273              | 1976235        | 481299              | 1897262        | 78.68       | 84.50   | 88.08   |
| 30         | 440035              | 2008287        | 424206              | 1965232        | 425241              | 1976232        | 74.78       | 78.49   | 74.71   |
| 40         | 413011              | 1942356        | 407167              | 1962362        | 401432              | 1987233        | 72.57       | 75.45   | 70.14   |
| 50         | 395228              | 1976233        | 356213              | 1976232        | 384691              | 1999733        | 68.25       | 65.54   | 66.79   |
| 60         | 366164              | 1972362        | 333006              | 1965253        | 347012              | 1978273        | 63.36       | 61.61   | 60.90   |

Table 1: Peak areas and % remaining values

Day 2:

| Time (min) | Assay 1             |                | Assay 2             |                | Assay 3             |                | (% remaining) |         |         |
|------------|---------------------|----------------|---------------------|----------------|---------------------|----------------|---------------|---------|---------|
|            | DK-I-89-1 Peak area | ISTD Peak area | DK-I-89-1 Peak area | ISTD Peak area | DK-I-89-1 Peak area | ISTD Peak area | Assay 1       | Assay 2 | Assay 3 |
| 0          | 549917              | 1976232        | 529475              | 1967253        | 575556              | 1976253        | 100.09        | 100.05  | 100.08  |
| 10         | 496314              | 1967232        | 459274              | 1956232        | 489236              | 1976232        | 90.75         | 87.27   | 85.07   |
| 20         | 458183              | 1972632        | 407367              | 1923762        | 459517              | 2000872        | 83.55         | 78.71   | 78.92   |
| 30         | 432253              | 1977623        | 391427              | 1952352        | 414530              | 1998762        | 78.62         | 74.53   | 71.26   |
| 40         | 395301              | 1955235        | 363066              | 2008273        | 416702              | 1962352        | 72.72         | 67.20   | 72.97   |
| 50         | 350019              | 1956232        | 359469              | 2000072        | 369384              | 1962533        | 64.36         | 66.81   | 64.68   |
| 60         | 338001              | 1997232        | 334995              | 1976232        | 363915              | 1976318        | 60.87         | 63.01   | 63.27   |

Table 2: Peak areas and % remaining values

**Calculation:**

From the peak area, Calculate the following

$$\text{Peak area ratio} = \frac{\text{Peak area of test compound (DK-I-89-1)}}{\text{Peak area of internal standard (ISTD)}}$$

$$\% \text{ remaining at time T} = \frac{\text{Peak area ratio at particular time T}}{\text{Peak area ratio at zero time point}} * 100$$

(T = 0, 10, 20,30,40,50 and 60)

## DATA ANALYSIS:

### Day 1

Linear regression analysis:

Slope:  $-0.007506 \pm 0.0003722$

At X= 60, Y =  $4.124 \pm 0.01342$

$R^2 = 0.9554$

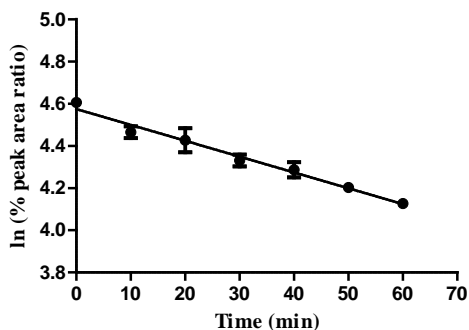

### Day 2

Linear regression analysis:

Slope:  $-0.000738 \pm 0.0002075$

At X = 60, Y =  $4.539 \pm 0.007480$

$R^2 = 0.9480$

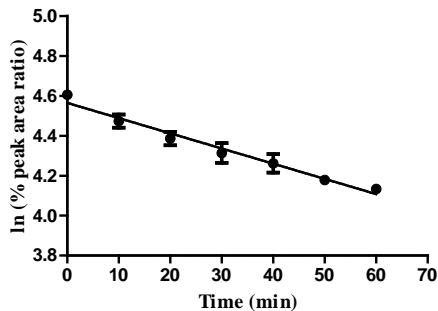

Metabolic Parameters:

Half-life:  $93.32 \pm 4.577$  min

$V_d$ : 100  $\mu\text{L}/\text{mg}$

Intrinsic clearance: 0.7506  $\mu\text{L}/\text{min}/\text{mg}$

Metabolic Rate: 15.012  $\text{nmol}/\text{min}/\text{mg}$

% remaining at 60 min:  $61.80 \pm 0.2\%$

Metabolic Parameters:

Half-life:  $91.01 \pm 4.89$  min

$V_d$ : 100  $\mu\text{L}/\text{mg}$

Intrinsic clearance: 0.7614  $\mu\text{L}/\text{min}/\text{mg}$

Metabolic Rate: 15.228  $\text{nmol}/\text{min}/\text{mg}$

% remaining at 60 min:  $60.82 \pm 0.21 \%$

Note: The peak area ratios and natural log values are calculated using Microsoft excel 2010 and linear regression analysis is calculated using GraphPad prism.

# Human Liver Microsomal Assay

Principal Investigator: Dr. Alexander Arnold

Operator: Revathi Kodali

Test Compound: **13g**

Concentration: 10  $\mu$ M

Date: 05-26-2016

Facility: Milwaukee Institute for Drug Discovery

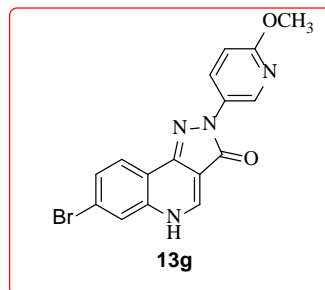

## Assay Protocol

Each evaluation included six independent assays carried out three at a time, on two different days

1. Preparation of solutions:
  - a. 1 mM test compound in DMSO.
  - b. 2  $\mu$ M 4,5 Di Phenyl Imidazole in ice cold Acetonitrile (ISTD).
2. For a total volume of Microsomal Assay Mixture (MAM) 390  $\mu$ L, sufficient for seven time points, combine the following
  - a. 282  $\mu$ L of 18.2 m $\Omega$  of water.
  - b. 80  $\mu$ L of 0.5 M potassium phosphate buffer (pH 7.4)
  - c. 20  $\mu$ L of NADPH A. (Corning life sciences, Cat # 451220)
  - d. 4  $\mu$ L of NADPH B. (Corning life sciences, Cat # 451200)
  - e. 4  $\mu$ L of test compound.
3. Sonicate MAM for 5 min and meanwhile thaw microsomes (20 mg/mL) (BD Gentest, Cat # 452156) on ice.
4. Aliquot 100  $\mu$ L of ice cold ISTD into seven separate 1.5 mL conical vials and label them the time points for 0, 10, 20, 30, 40, 50, and 60 min.
5. Arrange the timer. Microsomes (Final concentration of 0.5 mg/mL) should be added to all time points except the zero time point.
6. Add 50  $\mu$ L of the MAM solution to the conical vial labelled as zero time point. Place the remaining MAM solution in the incubator (37  $^{\circ}$ C) for 5 min and initiate the reaction with addition of microsomes (8.8  $\mu$ L) and record the time.
7. At the end of each time interval remove 50  $\mu$ L and add to 100  $\mu$ L ISTD in conical vial, sonicate for 10 sec and spin down at 10,000 rpm for 5 minutes.
8. Take 100  $\mu$ L of supernatant and transfer to Spin-X HPLC filter tubes (Corning Incorporated, Cat # 8169) and centrifuge at 13,000 rpm for 5 minutes and take 5  $\mu$ L from this solution and dilute in 495  $\mu$ L of LCMS grade methanol (Fischer scientific, CAS # 67-56-1) in an 2mL glass auto sampler vial (Microsolv, Cat # 95025-WCV)
9. The samples are analyzed by LCMS-8040. (Shimadzu)



**Data:**

Day 1:

| Time (min) | Assay 1              |                | Assay 2              |                | Assay 3              |                | % remaining |         |         |
|------------|----------------------|----------------|----------------------|----------------|----------------------|----------------|-------------|---------|---------|
|            | DK-II-48-1 Peak area | ISTD Peak area | DK-II-48-1 Peak area | ISTD Peak area | DK-II-48-1 Peak area | ISTD Peak area | Assay 1     | Assay 2 | Assay 3 |
| 0          | 1239575              | 409876         | 1282331              | 408077         | 1272732              | 424404         | 100.00      | 100.01  | 99.99   |
| 10         | 1272583              | 421502         | 1278046              | 415028         | 1275562              | 432495         | 99.84       | 98.00   | 98.34   |
| 20         | 1254337              | 431729         | 1305269              | 428021         | 1229879              | 422496         | 96.07       | 97.05   | 97.06   |
| 30         | 1221632              | 426097         | 1270878              | 425579         | 1208114              | 431322         | 94.80       | 95.04   | 93.39   |
| 40         | 1213285              | 426869         | 1251740              | 426921         | 1237850              | 438598         | 93.99       | 93.31   | 94.10   |
| 50         | 1206569              | 425741         | 1245491              | 420860         | 1245919              | 441826         | 93.71       | 94.18   | 94.02   |
| 60         | 1193565              | 413673         | 1243063              | 414198         | 1229125              | 429212         | 95.41       | 95.51   | 95.48   |

Table 1: Peak areas and % remaining values

Day 2:

| Time (min) | Assay 1              |                | Assay 2              |                | Assay 3              |                | (% remaining) |         |         |
|------------|----------------------|----------------|----------------------|----------------|----------------------|----------------|---------------|---------|---------|
|            | DK-II-48-1 Peak area | ISTD Peak area | DK-II-48-1 Peak area | ISTD Peak area | DK-II-48-1 Peak area | ISTD Peak area | Assay 1       | Assay 2 | Assay 3 |
| 0          | 1370833              | 444955         | 1198733              | 408906         | 1220048              | 417681         | 99.99         | 99.98   | 100.00  |
| 10         | 1328181              | 436723         | 1164859              | 407987         | 1222948              | 422920         | 98.71         | 97.37   | 98.99   |
| 20         | 1336173              | 447939         | 1160980              | 415555         | 1180805              | 419134         | 96.81         | 95.28   | 96.44   |
| 30         | 1288471              | 435125         | 1118801              | 402193         | 1145140              | 415499         | 96.11         | 94.87   | 94.35   |
| 40         | 1303844              | 448160         | 1129419              | 413993         | 1175925              | 416876         | 94.42         | 93.04   | 96.57   |
| 50         | 1310818              | 441914         | 1141621              | 409483         | 1163535              | 424257         | 96.27         | 95.08   | 93.89   |
| 60         | 1272477              | 436169         | 1153092              | 414963         | 1182693              | 435717         | 94.69         | 94.77   | 92.92   |

Table 2: Peak areas and % remaining values

**Calculation:**

From the peak area, Calculate the following

$$\text{Peak area ratio} = \frac{\text{Peak area of test compound (DK-II-48-1)}}{\text{Peak area of internal standard (ISTD)}}$$

$$\% \text{ remaining at time T} = \frac{\text{Peak area ratio at particular time T}}{\text{Peak area ratio at zero time point}} * 100$$

(T = 0, 10, 20,30,40,50 and 60)

## DATA ANALYSIS:

### Day 1

Linear regression analysis:

Slope:  $-0.0009583 \pm 0.0001613$

At X = 60, Y =  $4.537 \pm 0.005817$

$R^2 = 0.6500$

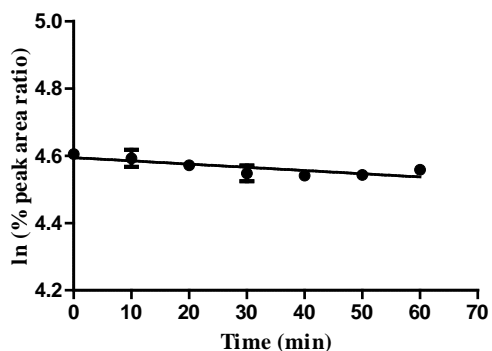

### Day 2

Linear regression analysis:

Slope:  $-0.0009464 \pm 0.0001399$

At X = 60, Y =  $4.538 \pm 0.005045$

$R^2 = 0.7066$

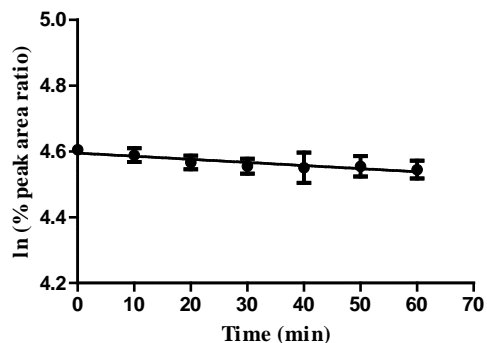

Metabolic Parameters:

Half-life:  $723.15 \pm 121$  min

$V_d$ : 100  $\mu$ L/mg

Intrinsic clearance: 0.09583  $\mu$ L/min/mg

Metabolic Rate: 1.9166 nmol/min/mg

% remaining at 60 min:  $93.41 \pm 0.12\%$

Metabolic Parameters:

Half-life:  $732.24 \pm 108.2$  min

$V_d$ : 100  $\mu$ L/mg

Intrinsic clearance: 0.09464  $\mu$ L/min/mg

Metabolic Rate: 1.8928 nmol/min/mg

% remaining at 60 min:  $93.5 \pm 0.10\%$

Note: The peak area ratios and natural log values are calculated using Microsoft excel 2010 and linear regression analysis is calculated using GraphPad prism.

# Mouse Liver Microsomal Assay

Principal Investigator: Dr. Alexander Arnold  
Operator: Revathi Kodali  
Test Compound: **13g**  
Concentration: 10  $\mu$ M  
Date: 05-26-2016  
Facility: Milwaukee Institute for Drug Discovery

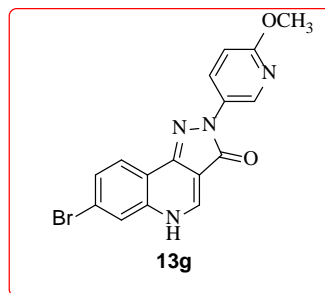

## Assay Protocol

Each evaluation included six independent assays carried out three at a time, on two different days

1. Preparation of solutions:
  - a. 1 mM test compound in DMSO.
  - b. 2  $\mu$ M 4,5 Di Phenyl Imidazole in ice cold Acetonitrile (ISTD).
2. For a total volume of Microsomal Assay Mixture (MAM) 390  $\mu$ L, sufficient for seven time points, combine the following
  - a. 282  $\mu$ L of 18.2 m $\Omega$  of water.
  - b. 80  $\mu$ L of 0.5 M potassium phosphate buffer (p<sup>H</sup> 7.4)
  - c. 20  $\mu$ L of NADPH A. (Corning life sciences, Cat # 451220)
  - d. 4  $\mu$ L of NADPH B. (Corning life sciences, Cat # 451200)
  - e. 4  $\mu$ L of test compound.
3. Sonicate MAM for 5 min and meanwhile thaw microsomes (20 mg/mL) (Life technologies, Cat # MSMC-PL) on ice.
4. Aliquot 100  $\mu$ L of ice cold ISTD into seven separate 1.5 mL conical vials and label them the time points for 0, 10, 20, 30, 40, 50, and 60 min.
5. Arrange the timer. Microsomes (Final concentration of 0.5 mg/mL) should be added to all time points except the zero time point.
6. Add 50  $\mu$ L of the MAM solution to the conical vial labelled as zero time point. Place the remaining MAM solution in the incubator (37 °C) for 5 min and initiate the reaction with addition of microsomes (8.8  $\mu$ L) and record the time.
7. At the end of each time interval remove 50  $\mu$ L and add to 100  $\mu$ L ISTD in conical vial, sonicate for 10 sec and spin down at 10,000 rpm for 5 minutes.
8. Take 100  $\mu$ L of supernatant and transfer to Spin-X HPLC filter tubes (Corning Incorporated, Cat # 8169) and centrifuge at 13,000 rpm for 5 minutes and take 5  $\mu$ L from this solution and dilute in 495  $\mu$ L of LCMS grade methanol (Fischer scientific, CAS # 67-56-1) in an 2mL glass auto sampler vial (Microsolv, Cat # 95025-WCV)
9. The samples are analyzed by LCMS-8040. (Shimadzu)

**Data:**

Day 1:

| Time (min) | Assay 1              |                | Assay 2              |                | Assay 3              |                | % remaining |         |         |
|------------|----------------------|----------------|----------------------|----------------|----------------------|----------------|-------------|---------|---------|
|            | DK-II-48-1 Peak area | ISTD Peak area | DK-II-48-1 Peak area | ISTD Peak area | DK-II-48-1 Peak area | ISTD Peak area | Assay 1     | Assay 2 | Assay 3 |
| 0          | 1285705              | 419827         | 1242554              | 422780         | 1356651              | 447903         | 100.01      | 100.00  | 99.99   |
| 10         | 1284540              | 435905         | 1313352              | 447517         | 1327774              | 441532         | 96.23       | 99.85   | 99.28   |
| 20         | 1292275              | 437096         | 1264515              | 444110         | 1274051              | 435877         | 96.55       | 96.88   | 96.49   |
| 30         | 1287912              | 429522         | 1236947              | 446158         | 1274901              | 437129         | 97.92       | 94.33   | 96.28   |
| 40         | 1254958              | 444035         | 1226739              | 439257         | 1271572              | 442179         | 92.30       | 95.02   | 94.93   |
| 50         | 1237554              | 436140         | 1245217              | 450546         | 1280902              | 443536         | 92.66       | 94.03   | 95.34   |
| 60         | 1254241              | 438615         | 1282355              | 457098         | 1250474              | 439668         | 93.38       | 95.45   | 93.89   |

Table 1: Peak areas and % remaining values

Day 2:

| Time (min) | Assay 1              |                | Assay 2              |                | Assay 3              |                | (% remaining) |         |         |
|------------|----------------------|----------------|----------------------|----------------|----------------------|----------------|---------------|---------|---------|
|            | DK-II-48-1 Peak area | ISTD Peak area | DK-II-48-1 Peak area | ISTD Peak area | DK-II-48-1 Peak area | ISTD Peak area | Assay 1       | Assay 2 | Assay 3 |
| 0          | 1307622              | 464746         | 1292157              | 462060         | 1295383              | 483598         | 99.98         | 99.98   | 99.98   |
| 10         | 1286526              | 464981         | 1272404              | 460828         | 1283952              | 495797         | 98.32         | 98.71   | 96.66   |
| 20         | 1243863              | 463202         | 1260023              | 460005         | 1173740              | 463148         | 95.42         | 97.93   | 94.59   |
| 30         | 1227268              | 468808         | 1222300              | 454360         | 1178574              | 460559         | 93.02         | 96.18   | 95.52   |
| 40         | 1232887              | 472905         | 1269061              | 482260         | 1113808              | 448574         | 92.64         | 94.08   | 92.68   |
| 50         | 1293819              | 482688         | 1280879              | 488503         | 1177897              | 471287         | 95.25         | 93.74   | 93.29   |
| 60         | 1236291              | 469676         | 1283362              | 474787         | 1150736              | 458568         | 93.54         | 96.64   | 93.67   |

Table 2: Peak areas and % remaining values

**Calculation:**

From the peak area, Calculate the following

$$\text{Peak area ratio} = \frac{\text{Peak area of test compound (DK-II-48-1)}}{\text{Peak area of internal standard (ISTD)}}$$

$$\% \text{ remaining at time T} = \frac{\text{Peak area ratio at particular time T}}{\text{Peak area ratio at zero time point}} * 100$$

(T = 0, 10, 20,30,40,50 and 60)

## DATA ANALYSIS:

### Day 1

Linear regression analysis:

Slope:  $-0.001060 \pm 0.0001535$

At X= 60, Y =  $4.535 \pm 0.005534$

$R^2 = 0.7150$

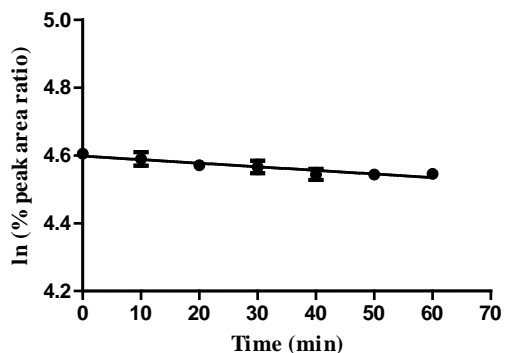

### Day 2

Linear regression analysis:

Slope:  $-0.0009786 \pm 0.0001849$

At X = 60, Y =  $4.533 \pm 0.006666$

$R^2 = 0.5959$

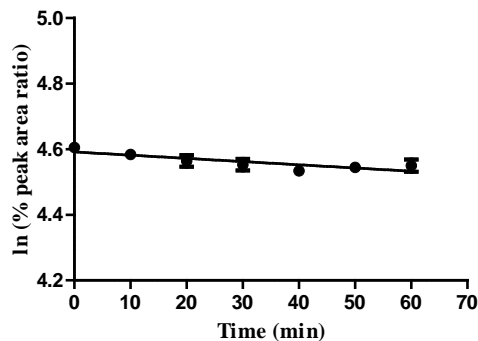

Metabolic Parameters:

Half-life:  $653.15 \pm 94.58$  min

$V_d$ : 100  $\mu$ L/mg

Intrinsic clearance: 0.1061  $\mu$ L/min/mg

Metabolic Rate: 2.122 nmol/min/mg

% remaining at 60 min:  $93.22 \pm 0.11\%$

Metabolic Parameters:

Half-life:  $708.15 \pm 133.8$  min

$V_d$ : 100  $\mu$ L/mg

Intrinsic clearance: 0.09786  $\mu$ L/min/mg

Metabolic Rate: 1.9572 nmol/min/mg

% remaining at 60 min:  $93.03 \pm 0.13\%$

Note: The peak area ratios and natural log values are calculated using Microsoft excel 2010 and linear regression analysis is calculated using GraphPad prism.

# Human Liver Microsomal Assay

Principal Investigator: Dr. Alexander Arnold

Operator: Revathi Kodali

Test Compound: **13h**

Concentration: 10  $\mu$ M

Date: 05-26-2016

Facility: Milwaukee Institute for Drug Discovery

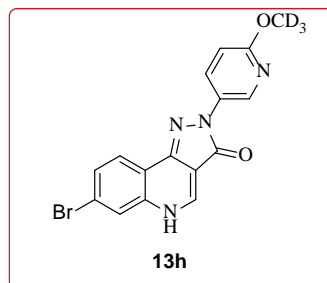

## Assay Protocol

Each evaluation included six independent assays carried out three at a time, on two different days

1. Preparation of solutions:
  - a. 1 mM test compound in DMSO.
  - b. 1  $\mu$ M 4,5 Di Phenyl Imidazole in ice cold Acetonitrile (ISTD).
2. For a total volume of Microsomal Assay Mixture (MAM) 390  $\mu$ L, sufficient for seven time points, combine the following
  - a. 282  $\mu$ L of 18.2 m $\Omega$  of water.
  - b. 80  $\mu$ L of 0.5 M potassium phosphate buffer (p<sup>H</sup> 7.4)
  - c. 20  $\mu$ L of NADPH A. (Corning life sciences, Cat # 451220)
  - d. 4  $\mu$ L of NADPH B. (Corning life sciences, Cat # 451200)
  - e. 4  $\mu$ L of test compound.
3. Sonicate MAM for 5 min and meanwhile thaw microsomes (20 mg/mL) (BD Gentest, Cat # 452156) on ice.
4. Aliquot 100  $\mu$ L of ice cold ISTD into seven separate 1.5 mL conical vials and label them the time points for 0, 10, 20, 30, 40, 50, and 60 min.
5. Arrange the timer. Microsomes (Final concentration of 0.5 mg/mL) should be added to all time points except the zero time point.
6. Add 50  $\mu$ L of the MAM solution to the conical vial labelled as zero time point. Place the remaining MAM solution in the incubator (37 °C) for 5 min and initiate the reaction with addition of microsomes (8.8  $\mu$ L) and record the time.
7. At the end of each time interval remove 50  $\mu$ L and add to 100  $\mu$ L ISTD in conical vial, sonicate for 10 sec and spin down at 10,000 rpm for 5 minutes.
8. Take 100  $\mu$ L of supernatant and transfer to Spin-X HPLC filter tubes (Corning Incorporated, Cat # 8169) and centrifuge at 13,000 rpm for 5 minutes and take 5  $\mu$ L from this solution and dilute in 495  $\mu$ L of LCMS grade methanol (Fischer scientific, CAS # 67-56-1) in an 2mL glass auto sampler vial (Microsolv, Cat # 95025-WCV)
9. The samples are analyzed by LCMS-8040. (Shimadzu)

**Data:**

Day 1:

| Time (min) | Assay 1              |                | Assay 2              |                | Assay 3              |                | % remaining |         |         |
|------------|----------------------|----------------|----------------------|----------------|----------------------|----------------|-------------|---------|---------|
|            | DK-II-58-1 Peak area | ISTD Peak area | DK-II-58-1 Peak area | ISTD Peak area | DK-II-58-1 Peak area | ISTD Peak area | Assay 1     | Assay 2 | Assay 3 |
| 0          | 1421837              | 1942342        | 1419848              | 1962134        | 1417715              | 1912342        | 100.00      | 99.94   | 100.04  |
| 10         | 1380499              | 1892342        | 1403676              | 1955231        | 1459331              | 1961234        | 99.66       | 99.15   | 100.41  |
| 20         | 1378668              | 1912344        | 1392460              | 1942316        | 1386585              | 1891234        | 98.48       | 99.02   | 98.94   |
| 30         | 1368091              | 1923804        | 1423956              | 2000134        | 1363567              | 1886236        | 97.15       | 98.33   | 97.55   |
| 40         | 1380251              | 1923424        | 1423495              | 2012342        | 1449749              | 1978234        | 98.03       | 97.70   | 98.90   |
| 50         | 1411529              | 1979443        | 1414892              | 1965474        | 1408869              | 1933454        | 97.41       | 99.43   | 98.33   |
| 60         | 1423608              | 1983905        | 1398364              | 1962344        | 1456496              | 1991273        | 98.03       | 98.42   | 98.71   |

Table 1: Peak areas and % remaining values

Day 2:

| Time (min) | Assay 1              |                | Assay 2              |                | Assay 3              |                | (% remaining) |         |         |
|------------|----------------------|----------------|----------------------|----------------|----------------------|----------------|---------------|---------|---------|
|            | DK-II-58-1 Peak area | ISTD Peak area | DK-II-58-1 Peak area | ISTD Peak area | DK-II-58-1 Peak area | ISTD Peak area | Assay 1       | Assay 2 | Assay 3 |
| 0          | 1508498              | 2008329        | 1480681              | 1967456        | 1471597              | 1992344        | 100.01        | 99.94   | 99.94   |
| 10         | 1441371              | 1924324        | 1470155              | 1963452        | 1457755              | 2000126        | 99.73         | 99.43   | 98.62   |
| 20         | 1435215              | 1934535        | 1458718              | 1949042        | 1405631              | 1922344        | 98.78         | 99.39   | 98.94   |
| 30         | 1424084              | 1899991        | 1437127              | 1943214        | 1402880              | 1931234        | 99.80         | 98.21   | 98.29   |
| 40         | 1421610              | 1923434        | 1440579              | 1949987        | 1412381              | 1943244        | 98.41         | 98.10   | 98.35   |
| 50         | 1418164              | 1889474        | 1423051              | 1934324        | 1427904              | 2000688        | 99.94         | 97.70   | 96.57   |
| 60         | 1410739              | 1934543        | 1429296              | 1923444        | 1416949              | 1934324        | 97.10         | 98.68   | 99.12   |

Table 2: Peak areas and % remaining values

**Calculation:**

From the peak area, Calculate the following

$$\text{Peak area ratio} = \frac{\text{Peak area of test compound (DK-II-58-1)}}{\text{Peak area of internal standard (ISTD)}}$$

$$\% \text{ remaining at time T} = \frac{\text{Peak area ratio at particular time T}}{\text{Peak area ratio at zero time point}} * 100$$

(T = 0, 10, 20,30,40,50 and 60)

## DATA ANALYSIS:

### Day 1

Linear regression analysis:

Slope:  $-0.0003012 \pm 8.169e^{-005}$

At X= 60, Y =  $4.583 \pm 0.002945$

$R^2 = 0.4171$

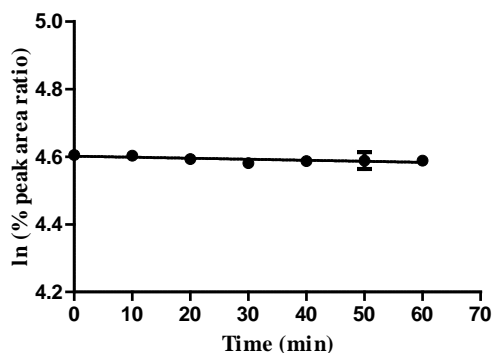

### Day 2

Linear regression analysis:

Slope:  $-0.0002976 \pm 8.722e^{-005}$

At X = 60, Y =  $4.584 \pm 0.003145$

$R^2 = 0.3799$

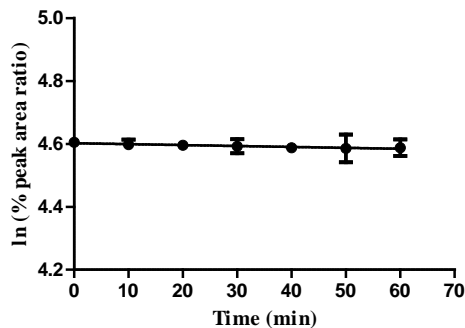

Metabolic Parameters:

Half-life: 2300.8 min

$V_d$ : 100  $\mu\text{L}/\text{mg}$

Intrinsic clearance: 0.03012  $\mu\text{L}/\text{min}/\text{mg}$

Metabolic Rate: 0.6024 nmol/min/mg

% remaining at 60 min:  $97.80 \pm 0.06 \%$

Metabolic Parameters:

Half-life: 2328.6 min

$V_d$ : 100  $\mu\text{L}/\text{mg}$

Intrinsic clearance: 0.02976  $\mu\text{L}/\text{min}/\text{mg}$

Metabolic Rate: 0.5952 nmol/min/mg

% remaining at 60 min:  $97.90 \pm 0.06 \%$

Note: The peak area ratios and natural log values are calculated using Microsoft excel 2010 and linear regression analysis is calculated using GraphPad prism.



# Mouse Liver Microsomal Assay

Principal Investigator: Dr. Alexander Arnold

Operator: Revathi Kodali

Test Compound: **13h**

Concentration: 10  $\mu$ M

Date: 05-26-2016

Facility: Milwaukee Institute for Drug Discovery

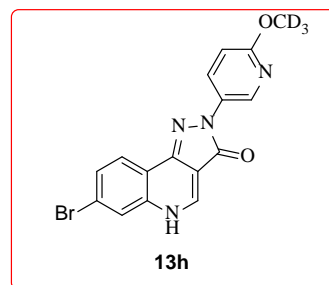

## Assay Protocol

Each evaluation included six independent assays carried out three at a time, on two different days

1. Preparation of solutions:
  - a. 1 mM test compound in DMSO.
  - b. 1  $\mu$ M 4,5 Di Phenyl Imidazole in ice cold Acetonitrile (ISTD).
2. For a total volume of Microsomal Assay Mixture (MAM) 390  $\mu$ L, sufficient for seven time points, combine the following
  - a. 282  $\mu$ L of 18.2 m $\Omega$  of water.
  - b. 80  $\mu$ L of 0.5 M potassium phosphate buffer (pH 7.4)
  - c. 20  $\mu$ L of NADPH A. (Corning life sciences, Cat # 451220)
  - d. 4  $\mu$ L of NADPH B. (Corning life sciences, Cat # 451200)
  - e. 4  $\mu$ L of test compound.
3. Sonicate MAM for 5 min and meanwhile thaw microsomes (20 mg/mL) (Life technologies, Cat # 452156) on ice.
4. Aliquot 100  $\mu$ L of ice cold ISTD into seven separate 1.5 mL conical vials and label them the time points for 0, 10, 20, 30, 40, 50, and 60 min.
5. Arrange the timer. Microsomes (Final concentration of 0.5 mg/mL) should be added to all time points except the zero time point.
6. Add 50  $\mu$ L of the MAM solution to the conical vial labelled as zero time point. Place the remaining MAM solution in the incubator (37  $^{\circ}$ C) for 5 min and initiate the reaction with addition of microsomes (8.8  $\mu$ L) and record the time.
7. At the end of each time interval remove 50  $\mu$ L and add to 100  $\mu$ L ISTD in conical vial, sonicate for 10 sec and spin down at 10,000 rpm for 5 minutes.
8. Take 100  $\mu$ L of supernatant and transfer to Spin-X HPLC filter tubes (Corning Incorporated, Cat # 8169) and centrifuge at 13,000 rpm for 5 minutes and take 5  $\mu$ L from this solution and dilute in 495  $\mu$ L of LCMS grade methanol (Fischer scientific, CAS # 67-56-1) in a 2mL glass auto sampler vial (Microsolv, Cat # 95025-WCV)
9. The samples are analyzed by LCMS-8040. (Shimadzu)

**Data:**

Day 1:

| Time (min) | Assay 1              |                | Assay 2              |                | Assay 3              |                | % remaining |         |         |
|------------|----------------------|----------------|----------------------|----------------|----------------------|----------------|-------------|---------|---------|
|            | DK-II-58-1 Peak area | ISTD Peak area | DK-II-58-1 Peak area | ISTD Peak area | DK-II-58-1 Peak area | ISTD Peak area | Assay 1     | Assay 2 | Assay 3 |
| 0          | 1435197              | 1954234        | 1423673              | 1973613        | 1424627              | 1943243        | 100.05      | 100.04  | 100.01  |
| 10         | 1443000              | 2001324        | 1412024              | 2000234        | 1404550              | 1928213        | 98.23       | 97.91   | 99.37   |
| 20         | 1409619              | 1932414        | 1417757              | 2003412        | 1435097              | 2000123        | 99.38       | 98.15   | 97.88   |
| 30         | 1386905              | 1910094        | 1380284              | 1956728        | 1427626              | 1971422        | 98.92       | 97.83   | 98.79   |
| 40         | 1388622              | 1952344        | 1392320              | 1931324        | 1413076              | 1935162        | 96.90       | 99.98   | 99.61   |
| 50         | 1415644              | 1952344        | 1365942              | 1924234        | 1407763              | 1942342        | 98.78       | 98.45   | 98.87   |
| 60         | 1400478              | 1928631        | 1362173              | 1934144        | 1405660              | 1962361        | 98.93       | 97.68   | 97.72   |

Table 1: Peak areas and % remaining values

Day 2:

| Time (min) | Assay 1              |                | Assay 2              |                | Assay 3              |                | (% remaining) |         |         |
|------------|----------------------|----------------|----------------------|----------------|----------------------|----------------|---------------|---------|---------|
|            | DK-II-58-1 Peak area | ISTD Peak area | DK-II-58-1 Peak area | ISTD Peak area | DK-II-58-1 Peak area | ISTD Peak area | Assay 1       | Assay 2 | Assay 3 |
| 0          | 1415534              | 1978364        | 1437757              | 2000783        | 1431126              | 1978362        | 99.93         | 99.94   | 100.05  |
| 10         | 1406743              | 1997364        | 1404661              | 1958912        | 1415235              | 1967532        | 98.36         | 99.73   | 99.48   |
| 20         | 1412266              | 1989874        | 1401648              | 1989783        | 1416480              | 2000732        | 99.12         | 97.97   | 97.92   |
| 30         | 1352676              | 1897634        | 1408788              | 1967562        | 1400171              | 1967623        | 99.55         | 99.58   | 98.42   |
| 40         | 1407009              | 1974777        | 1391135              | 1940782        | 1423223              | 1996723        | 99.51         | 99.69   | 98.58   |
| 50         | 1378771              | 1962365        | 1390888              | 1963265        | 1395581              | 1965356        | 98.12         | 98.53   | 98.21   |
| 60         | 1421844              | 2000837        | 1403716              | 1987673        | 1412645              | 1967236        | 99.24         | 98.22   | 99.32   |

Table 2: Peak areas and % remaining values

**Calculation:**

From the peak area, Calculate the following

$$\text{Peak area ratio} = \frac{\text{Peak area of test compound (DK-II-58-1)}}{\text{Peak area of internal standard (ISTD)}}$$

$$\% \text{ remaining at time T} = \frac{\text{Peak area ratio at particular time T}}{\text{Peak area ratio at zero time point}} * 100$$

(T = 0, 10, 20,30,40,50 and 60)

## DATA ANALYSIS:

### Day 1

Linear regression analysis:

Slope:  $-0.0001821 \pm 9.454e^{-005}$

At X= 60, Y =  $4.587 \pm 0.003409$

$R^2 = 0.1634$

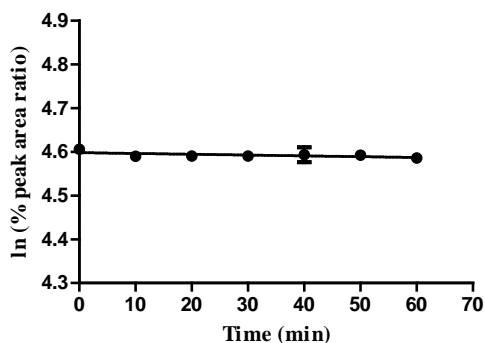

### Day 2

Linear regression analysis:

Slope:  $-0.0001476 \pm 7.506e^{-005}$

At X = 60, Y =  $4.591 \pm 0.002706$

$R^2 = 0.1691$

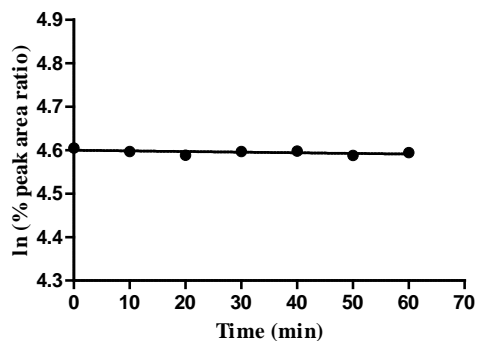

Metabolic Parameters:

Half-life: 3805.6 min

$V_d$ : 100  $\mu\text{L}/\text{mg}$

Intrinsic clearance: 0.01821  $\mu\text{L}/\text{min}/\text{mg}$

Metabolic Rate: 0.3642 nmol/min/mg

% remaining at 60 min:  $98.19 \pm 0.07 \%$

Metabolic Parameters:

Half-life: 4695.12 min

$V_d$ : 100  $\mu\text{L}/\text{mg}$

Intrinsic clearance: 0.01476  $\mu\text{L}/\text{min}/\text{mg}$

Metabolic Rate: 0.2952 nmol/min/mg

% remaining at 60 min:  $98.59 \pm 0.05 \%$

Note: The peak area ratios and natural log values are calculated using Microsoft excel 2010 and linear regression analysis is calculated using GraphPad prism.
